# Supplementary material for: Plasmodium ARK1 regulates spindle formation during atypical mitosis and forms a divergent chromosomal passenger complex
Source: Research Square preprint supplement (doi:10.21203/rs.3.rs-7473364/v1), 2025-09-25
Supplement: Supplementary file 2 [file 23b21c7b9fe8c8b6c4118b74.xlsx]

## Sheet: Supplementary Table 2, Tab 1
Supplementary Table 2. Protein identification for LC-MS/MS for ARK1-GFP and WT-GFP
Supplementary Table 2	interactomics ARK1
volcano plot	ratio and p-values relative iBAQ values for male gamonts and schizont samples (WT vs ARK1-GFP)
ARK1 schizonts	schizonts (8-9hrs) WT vs. ARK1-GFP - different quantitative/qualitative values: unique peptides; coverage; intensity;ibaq;relative ibaq;LFQ;MS counts
ARK1 gametocytes	male gametocytes (1.5mins) WT vs. ARK1-GFP - different quantitative/qualitative values: unique peptides; coverage; intensity;ibaq;relative ibaq;LFQ;MS counts

## Sheet: Supplementary Table 2, Tab 2
	info		enrichment-statistics			relative iBAQ samples (scaled)
PBANKA ID	gene name	category	LOG_2(ratio)	-LOG_10(p)	FDR (0.05) & ratio>2	SCH_WT_1	SCH_WT_2	G_WT_1	G_WT_2	SCH_ARK1_1	SCH_ARK1_2	G_ARK1_1	G_ARK1_2
PBANKA_0104100	ARK1	CPC	2.58586	4.87439	TRUE	2.44134	2.31017	2.06354	2.40659	11.7717	13.0553	15.7861	14.751
PBANKA_1343200	INCENP2	CPC	2.34752	5.02802	TRUE	2.16573	2.28128	2.12601	2.24684	9.70091	11.1075	12.9099	11.1701
PBANKA_1353900	INCENP1	CPC	2.20906	5.3757	TRUE	2.2169	2.09093	2.32287	2.49283	9.43013	10.6052	11.919	10.2305
PBANKA_1326900	POLA-B	DNA replication & repair	2.03155	4.28616	TRUE	2.14694	2.17704	2.25031	2.33645	7.50329	8.4893	10.1441	10.2943
PBANKA_1336900	MCM10-like	DNA replication & repair	1.81599	2.83744	FALSE	2.1413	2.36254	2.04505	2.23612	5.74166	6.51172	10.1441	8.5347
PBANKA_0207200	207200	background/unknown	1.71946	3.97763	FALSE	2.13396	2.16306	2.06502	2.20699	6.05842	6.48184	8.5509	7.12773
PBANKA_0803000	ORC2	DNA replication & repair	1.56965	2.92194	FALSE	2.02377	2.47503	2.12819	2.02312	5.56286	7.35182	7.93268	4.82896
PBANKA_1337600	1337600	DNA replication & repair	1.56943	3.31301	FALSE	2.1435	2.06377	2.34686	2.464	5.33631	6.11924	8.34504	6.96414
PBANKA_0924100	924100	background/unknown	1.53817	0.991318	FALSE	2.08655	2.01423	2.36546	2.23109	0.0182258	7.16943	9.18068	8.89087
PBANKA_1103100	ADF1	background/unknown	1.5279	1.47986	FALSE	2.18166	2.30945	2.08288	2.42647	6.42057	7.62752	2.31411	9.59193
PBANKA_1116300	MQO	background/unknown	1.5081	4.769	FALSE	2.19609	2.33862	2.0349	2.45522	6.37033	7.28435	5.71691	6.29815
PBANKA_0303300	CDC45	DNA replication & repair	1.47263	1.00946	FALSE	2.09075	2.00295	2.22586	2.25467	5.89519	0.481	8.93107	8.48855
PBANKA_0706700	DTC	background/unknown	1.40267	1.70291	FALSE	2.33133	2.05715	2.09123	2.08092	6.45899	6.80604	2.33201	7.03643
PBANKA_1102900	CDC6	DNA replication & repair	1.37954	1.95438	FALSE	2.07635	6.84234	2.07973	2.1516	6.69077	7.6674	10.4375	9.41884
PBANKA_0312500	ORC5	DNA replication & repair	1.35281	0.779603	FALSE	2.3398	2.04248	2.44268	2.09429	3.88798	0.411999	10.1339	8.3466
PBANKA_1409900	AP1M1	background/unknown	1.26918	0.922379	FALSE	2.25618	2.40566	2.42992	2.38502	7.59435	0.207985	7.91247	7.12653
PBANKA_1402500	CAPH	chromatin architecture	1.26819	1.61752	FALSE	2.28169	2.26516	2.32296	2.03178	6.45326	7.01027	5.63188	2.34495
PBANKA_0808500	808500	background/unknown	1.26532	0.613306	FALSE	2.42795	2.44408	2.09723	2.29411	10.2757	0.421218	9.46304	2.10731
PBANKA_0513900	ORC3	DNA replication & repair	1.25435	0.807261	FALSE	2.30054	2.20524	2.09422	2.08148	4.1634	0.440814	8.82722	7.27912
PBANKA_0517200	HAD1	background/unknown	1.25116	1.66063	FALSE	2.07778	8.99639	2.37376	2.07764	8.3762	9.16768	9.29601	10.116
PBANKA_1108700	SMC4	chromatin architecture	1.17619	1.68488	FALSE	6.75435	2.21287	2.14472	2.3277	5.75558	7.20866	9.31872	8.08793
PBANKA_1448900	POLE-B	DNA replication & repair	1.17252	0.840038	FALSE	2.19026	2.44167	2.43176	2.24182	0.243343	5.94739	8.26696	6.51736
PBANKA_1426500	CUL1	background/unknown	1.13338	0.742296	FALSE	2.18042	2.48358	2.00837	2.06879	0.477832	3.96951	8.59118	6.1371
PBANKA_1111600	1111600	background/unknown	1.09491	1.14987	FALSE	12.9943	2.48501	2.4604	2.42327	10.5063	10.9593	10.9696	11.06
PBANKA_0202500	RFC-like	DNA replication & repair	1.07394	0.683928	FALSE	2.25375	2.23005	2.13653	2.19915	4.34419	0.357139	8.76011	5.10505
PBANKA_0621300	AKiT1	KT_spindle_MTOC	1.04719	3.84103	FALSE	2.07035	2.23376	2.03636	2.28141	3.75008	4.58478	5.01933	4.46293
PBANKA_0209300	ARP1	background/unknown	1.04591	1.45721	FALSE	2.4572	2.31202	2.01701	7.28577	5.68264	7.23472	8.17398	7.96259
PBANKA_1321700	BP1	background/unknown	1.03145	0.887836	FALSE	2.45802	6.92977	2.38188	2.20681	8.72892	9.91875	2.11195	7.80946
PBANKA_1358300	MSH2	DNA replication & repair	1.01976	0.807006	FALSE	2.0002	2.47772	2.403	2.35063	2.26923	2.23491	8.09506	6.11854
PBANKA_0812000	PRIM2	DNA replication & repair	1.00751	1.06929	FALSE	9.67029	2.38537	2.07791	2.05329	6.84969	7.268	9.65712	8.76781
PBANKA_0300600	PHIST	background/unknown	0.987475	0.892211	FALSE	7.27665	2.47048	2.37518	2.24542	8.10058	9.32348	2.44492	8.61809
PBANKA_1358800	SPC25	KT_spindle_MTOC	0.959739	0.496397	FALSE	2.30934	2.0836	2.35048	2.08938	5.87534	0.241461	8.86257	2.20007
PBANKA_0516600	LRR1	background/unknown	0.952146	1.254	FALSE	2.32055	2.34697	2.48111	8.15379	7.35027	7.94626	8.14649	6.1633
PBANKA_1442200	SOC2	DNA replication & repair	0.948901	1.10505	FALSE	2.21238	2.11694	2.47312	2.41016	2.51484	3.36285	7.12705	4.77927
PBANKA_1026300	SYCP2L1	background/unknown	0.940367	0.985218	FALSE	9.93606	2.08543	2.21773	2.49974	7.06595	7.63936	9.71327	7.70376
PBANKA_1312000	CAPG2	chromatin architecture	0.935823	1.00935	FALSE	2.23855	2.41401	2.4309	2.41139	3.90688	4.71556	7.4283	2.11274
PBANKA_1348800	ORC4	DNA replication & repair	0.916695	0.888395	FALSE	9.551	2.02428	2.25335	2.10274	6.08758	6.32575	9.2047	8.45699
PBANKA_0717500	CBP20	background/unknown	0.904964	0.843856	FALSE	2.26544	11.4907	2.35314	2.22924	9.5947	9.60091	7.42575	7.71745
PBANKA_0933900	GLO1	background/unknown	0.902145	0.471086	FALSE	2.21253	2.20886	2.05812	2.42632	0.392366	5.10762	2.23341	8.91021
PBANKA_0804300	MSH2-2	DNA replication & repair	0.897897	1.22639	FALSE	2.12637	2.30174	7.39284	8.5772	7.46772	8.76707	11.4555	10.3186
PBANKA_1131100	ADSS	background/unknown	0.894304	0.945601	FALSE	10.3154	2.4847	2.30568	2.39576	7.96692	8.88121	6.96781	8.71444
PBANKA_0822900	DNAI1b	background/unknown	0.885338	0.370504	FALSE	2.40381	2.0538	2.47811	2.45584	0.176305	0.434943	8.33792	8.3989
PBANKA_0920100	920100	background/unknown	0.829436	0.493229	FALSE	2.12874	2.12346	7.81554	2.06916	6.76639	0.383808	10.279	7.69191
PBANKA_0409800	ICAP4	background/unknown	0.787541	0.449249	FALSE	2.01676	2.15349	2.26992	2.49185	5.67669	0.152922	7.30118	2.28704
PBANKA_1127000	CEPT	background/unknown	0.767634	0.474059	FALSE	12.0822	2.03113	2.27397	2.38484	9.97704	10.3294	9.53204	2.12059
PBANKA_0941200	941200	background/unknown	0.763538	0.621672	FALSE	2.01294	7.66122	2.11973	2.03075	7.34973	7.39359	6.38587	2.34018
PBANKA_1347600	1347600	background/unknown	0.745399	0.470325	FALSE	2.27576	11.2859	2.13699	2.02869	9.38155	9.90781	2.26906	8.16043
PBANKA_0809000	809000	background/unknown	0.741749	0.889639	FALSE	2.46334	7.87411	2.15262	2.45896	6.54952	7.07323	5.98165	5.39339
PBANKA_0904500	AOS1	background/unknown	0.741277	0.899171	FALSE	2.19287	6.97994	2.04275	2.26069	6.11685	4.50742	6.38453	5.51884
PBANKA_0501700	501700	background/unknown	0.727559	1.0005	FALSE	2.29003	7.79245	2.12109	8.43171	7.72104	8.40068	9.22901	8.81792
PBANKA_1204800	PhLP3	background/unknown	0.726669	0.426771	FALSE	8.68427	2.33583	2.39625	2.1961	7.34302	0.222247	9.69211	8.57834
PBANKA_1007200	RPA1	background/unknown	0.726222	0.665324	FALSE	2.34143	7.29291	2.0517	2.40258	6.73998	7.43092	6.53587	2.60005
PBANKA_0510200	510200	background/unknown	0.72413	0.454619	FALSE	11.1841	2.30414	2.04348	2.05528	9.10268	9.73244	7.95698	2.25996
PBANKA_0931100	931100	background/unknown	0.710713	0.824938	FALSE	2.42438	2.34266	10.4332	11.136	9.08758	10.0662	11.654	12.2945
PBANKA_1337500	STU2	KT_spindle_MTOC	0.70909	0.934578	FALSE	6.25753	2.02466	2.21951	2.46064	4.2877	5.24802	6.62506	5.02971
PBANKA_1105400	SUMO	background/unknown	0.70582	0.835166	FALSE	2.23088	10.6195	2.22628	10.6728	10.3107	10.6814	10.7961	10.2111
PBANKA_1034100	FANCJ	DNA replication & repair	0.698478	0.840031	FALSE	9.25573	7.27738	2.11845	2.18777	6.95545	7.8945	10.1552	8.81272
PBANKA_0110200	LSM12	background/unknown	0.683612	0.444705	FALSE	2.1955	10.5934	2.26768	2.12202	8.63899	8.29898	8.46309	2.19046
PBANKA_1122800	1122800	background/unknown	0.679194	0.373834	FALSE	2.04253	2.38887	10.0521	2.26125	7.26246	0.386861	9.39257	9.77059
PBANKA_0202300	202300	background/unknown	0.677816	0.599481	FALSE	2.17885	6.89353	2.06013	2.32414	6.36685	6.8378	2.2086	6.11356
PBANKA_0410400	GSK3	background/unknown	0.671874	0.376673	FALSE	2.44441	2.27673	2.42439	8.48651	0.0863161	6.01873	9.75196	9.04704
PBANKA_1451500	1451500	background/unknown	0.656268	0.355527	FALSE	9.87277	2.11983	2.31055	2.21596	7.65934	0.122062	9.13573	9.117
PBANKA_0943200	CK2beta1	background/unknown	0.652248	0.739121	FALSE	10.9261	2.35678	2.34524	6.44178	7.89766	8.02096	9.7761	8.99074
PBANKA_0712100	712100	background/unknown	0.651516	0.78903	FALSE	9.69631	7.81341	2.47101	2.29367	7.25381	7.96045	9.9451	9.82966
PBANKA_0307100	Timeless/Tof1	DNA replication & repair	0.648576	0.853139	FALSE	5.26925	5.83084	2.23277	2.15934	4.11287	5.18758	7.60486	7.3806
PBANKA_0715200	EIF3G	expression	0.600246	0.590691	FALSE	11.0645	13.283	2.06126	2.20324	10.7493	10.9287	11.4407	10.2563
PBANKA_0402800	EHD	background/unknown	0.57925	0.45678	FALSE	2.23589	7.84265	2.10653	2.45302	6.80942	6.81246	6.05744	2.19102
PBANKA_1217000	1217000	background/unknown	0.575468	0.461847	FALSE	2.33177	7.70746	2.12587	2.42452	6.20083	6.24939	2.19128	7.09937
PBANKA_1358900	1358900	background/unknown	0.561432	0.29254	FALSE	2.05267	2.08853	2.17846	2.29803	0.117594	3.48514	7.04634	2.06835
PBANKA_1416900	SMC2	chromatin architecture	0.560364	0.521405	FALSE	8.21393	6.49548	2.11558	2.0023	5.33563	4.87144	10.127	7.42946
PBANKA_1243900	AKiT5	KT_spindle_MTOC	0.560021	0.370121	FALSE	2.33406	2.35507	2.26318	2.14906	0.280335	5.18738	5.64951	2.30083
PBANKA_1129100	POLE-A	DNA replication & repair	0.534132	0.582214	FALSE	8.54612	7.99047	2.00995	2.23374	6.41954	7.00334	9.23112	7.43731
PBANKA_1117500	RPL27a	ribosome	0.522034	0.452373	FALSE	15.7372	16.0904	2.46775	2.29608	13.987	14.188	13.0406	11.3288
PBANKA_0818500	818500	background/unknown	0.518479	0.325817	FALSE	5.88975	7.19418	2.27063	2.44585	6.08453	0.305409	9.7374	9.37076
PBANKA_1223300	RAB18	background/unknown	0.512949	0.455519	FALSE	13.5698	13.3453	2.1619	2.07674	11.3917	11.4935	11.2302	10.3397
PBANKA_0501300	POLD-A	DNA replication & repair	0.502493	0.519507	FALSE	10.7178	10.018	2.22311	2.44051	8.4458	8.58526	9.8078	9.14354
PBANKA_0813400	813400	background/unknown	0.49706	0.205435	FALSE	2.24198	2.33876	2.03757	2.38471	0.028679	0.233236	5.4596	6.98475
PBANKA_0834300	GCP3B	background/unknown	0.478649	0.455355	FALSE	2.48751	6.37336	2.38501	2.48466	5.54499	5.61754	5.89178	2.07835
PBANKA_0836800	EMAP1	background/unknown	0.475108	0.537457	FALSE	2.46747	9.60398	2.48438	8.59078	8.20797	8.80719	7.47106	7.68809
PBANKA_1135000	YOP1L	background/unknown	0.466008	0.401339	FALSE	15.0002	14.326	2.38287	2.48223	12.6253	12.7949	10.6605	11.1472
PBANKA_1226600	TUBG	KT_spindle_MTOC	0.463596	0.441743	FALSE	10.9937	11.0783	2.25017	2.20637	8.8701	9.1031	9.4801	9.12879
PBANKA_0819300	EIF3F	expression	0.458782	0.392964	FALSE	13.6204	13.7183	2.08001	2.43747	11.7928	11.6634	10.3342	9.99211
PBANKA_0512700	512700	background/unknown	0.45563	0.429012	FALSE	11.7339	2.04454	2.48009	8.2748	8.79433	8.68077	7.54582	8.62362
PBANKA_1310400	CEN2	background/unknown	0.454551	0.36818	FALSE	15.298	15.7568	2.0946	2.49016	13.5193	13.3146	10.9149	11.0901
PBANKA_1361500	CFAP52	KT_spindle_MTOC	0.448919	0.173854	FALSE	2.09584	2.21285	2.35047	6.78123	0.452147	0.0974226	8.82336	8.97344
PBANKA_1452500	1452500	background/unknown	0.448774	0.424824	FALSE	11.367	11.3446	2.30167	2.33736	9.367	9.10576	9.47514	9.38231
PBANKA_1033100	1033100	background/unknown	0.446873	0.427508	FALSE	10.9848	10.0552	2.08106	2.41457	8.46697	8.04713	9.23829	9.05487
PBANKA_0307800	307800	background/unknown	0.443494	0.384065	FALSE	13.1321	13.0939	2.16954	2.43544	11.3138	11.118	9.35532	10.1398
PBANKA_0706800	706800	background/unknown	0.441686	0.405838	FALSE	11.9758	11.7556	2.42507	2.31861	10.2102	10.2559	9.66665	8.54188
PBANKA_0306500	ARMT1	DNA replication & repair	0.43565	0.22677	FALSE	2.37123	9.73028	2.38367	2.1145	7.13547	0.44389	8.76002	6.11202
PBANKA_1104800	ALP2b	background/unknown	0.433485	0.203488	FALSE	2.25303	2.14234	2.45515	2.34524	0.382652	0.397172	5.87072	5.76826
PBANKA_0314200	CDPK1	background/unknown	0.432627	0.616221	FALSE	8.74368	2.0283	6.45501	6.62136	6.4831	7.04074	9.72798	8.93602
PBANKA_1103000	SRSF12	background/unknown	0.432433	0.371337	FALSE	14.1847	12.5289	2.28147	2.44144	11.5788	10.6689	9.96809	10.208
PBANKA_1417900	1417900	background/unknown	0.431752	0.263527	FALSE	2.49206	6.37773	2.36375	5.03648	0.392689	4.39692	9.23465	7.92189
PBANKA_0100800	100800	background/unknown	0.431237	0.437428	FALSE	8.80344	8.78894	2.35773	2.41467	5.74612	7.78008	9.29156	7.33866
PBANKA_1365200	TXNDC5	background/unknown	0.428292	0.344808	FALSE	14.5188	14.2023	2.35394	2.07685	12.1031	12.2639	9.63399	10.6095
PBANKA_0623100	623100	background/unknown	0.423517	0.322094	FALSE	7.67794	2.15364	2.42935	2.3836	5.25365	6.27961	2.12455	5.98333
PBANKA_1405100	1405100	background/unknown	0.421262	0.395033	FALSE	10.6493	10.5638	2.39638	2.07167	8.64364	8.706	8.5613	8.47868
PBANKA_0922300	ThrRS	background/unknown	0.416859	0.430528	FALSE	8.51896	9.17882	2.39655	2.15798	6.99402	7.47428	6.942	8.29692
PBANKA_0813900	RPN8	expression	0.415263	0.368881	FALSE	11.8425	12.1957	2.41564	2.32873	9.88628	8.27849	9.90304	10.315
PBANKA_0937100	VPS35	background/unknown	0.406397	0.373745	FALSE	10.8989	10.1627	2.3518	2.12877	8.52267	8.55725	9.1001	7.67297
PBANKA_0819800	gammaGCS	background/unknown	0.405207	0.272167	FALSE	8.65857	2.10074	2.39261	2.07785	6.35676	6.50663	4.86682	2.43825
PBANKA_0919600	NOT2	background/unknown	0.400581	0.260693	FALSE	8.8571	2.08839	2.06485	2.1703	5.85687	5.43672	6.36982	2.37563
PBANKA_1348100	1348100	background/unknown	0.400396	0.344127	FALSE	12.6404	12.7696	2.3963	2.30178	10.543	10.0756	9.43089	9.68928
PBANKA_1030600	1030600	background/unknown	0.39767	0.265864	FALSE	2.2158	2.02922	10.1185	9.76232	9.25887	10.1237	2.22517	10.1751
PBANKA_1320400	1320400	background/unknown	0.39036	0.194437	FALSE	10.196	2.4925	2.09349	2.2787	0.24116	6.5326	8.17489	7.41309
PBANKA_0903900	SEC21	background/unknown	0.384474	0.300832	FALSE	12.0709	12.2751	2.07686	2.07357	10.5298	10.875	8.40588	7.3882
PBANKA_0103900	103900	background/unknown	0.382598	0.31419	FALSE	12.3651	12.4517	2.3795	2.08182	10.4448	10.5115	8.71797	8.49528
PBANKA_1035100	NOP1	background/unknown	0.378439	0.30903	FALSE	12.2221	12.5637	2.24977	2.29262	10.6341	10.705	8.11564	8.67005
PBANKA_0913700	913700	background/unknown	0.376365	0.302703	FALSE	12.3512	12.9392	2.31131	2.01136	10.6249	9.97951	9.21584	8.61945
PBANKA_1125500	1125500	background/unknown	0.375043	0.342882	FALSE	10.9902	10.324	2.40068	2.30403	8.76551	8.91226	7.93416	8.13144
PBANKA_1025800	1025800	background/unknown	0.370628	0.293046	FALSE	12.4842	12.3983	2.17035	2.10166	10.4479	10.3141	9.2632	7.669
PBANKA_0613200	POLA-A	DNA replication & repair	0.367724	0.50754	FALSE	9.23261	7.97804	2.47311	5.60225	6.6707	7.22248	9.83553	8.8982
PBANKA_0706400	DCC1	background/unknown	0.36603	0.370394	FALSE	8.85061	8.17176	2.4499	2.10179	6.45726	7.07558	7.62593	6.6459
PBANKA_1431500	RSPH9	background/unknown	0.362039	0.137397	FALSE	2.36649	2.4365	2.45896	7.73894	0.480302	0.109149	8.71149	9.97882
PBANKA_0309100	ERF1	background/unknown	0.361677	0.469099	FALSE	11.0702	10.0902	2.33832	5.94678	8.90482	9.29931	9.68741	9.94351
PBANKA_1431900	1431900	background/unknown	0.360951	0.298485	FALSE	11.399	11.8539	2.11644	2.21362	9.61091	9.12989	8.19092	8.49232
PBANKA_1107300	NPL4	background/unknown	0.356598	0.320452	FALSE	9.19193	11.3007	2.38458	2.34872	8.69411	8.41748	7.1832	8.00453
PBANKA_1137200	SEC24A	background/unknown	0.352413	0.310119	FALSE	10.7465	10.7744	2.13994	2.44183	8.75891	8.52953	8.21584	7.82085
PBANKA_1302200	SEC62	background/unknown	0.352329	0.284552	FALSE	11.5036	11.4015	2.04457	2.11511	9.27468	9.38295	7.9962	7.89769
PBANKA_0913400	PPM8	background/unknown	0.350949	0.290592	FALSE	9.6509	11.2765	2.05993	2.331	8.92389	9.25314	7.84899	6.26493
PBANKA_1026600	SEY1	background/unknown	0.339828	0.268426	FALSE	11.1091	11.6793	2.09855	2.07764	9.58766	9.4112	7.27963	7.84806
PBANKA_0623300	623300	background/unknown	0.338449	0.283243	FALSE	11.3516	11.0102	2.31529	2.3171	9.12651	9.46551	6.99513	8.54419
PBANKA_1407600	RPL24	ribosome	0.336191	0.391351	FALSE	15.0482	15.3241	2.18577	9.49758	13.3728	13.5683	13.4062	12.7445
PBANKA_0401600	NSF	background/unknown	0.332899	0.263696	FALSE	11.924	11.8759	2.26772	2.03423	9.4382	9.06187	9.20716	7.68817
PBANKA_1419100	1419100	background/unknown	0.332891	0.458386	FALSE	2.07576	7.79013	10.0339	8.3157	7.77588	8.52566	9.07537	10.1615
PBANKA_1101400	RAP2/3	background/unknown	0.324329	0.268795	FALSE	11.5227	9.89724	2.40596	2.07533	8.75424	8.79187	7.04126	7.84315
PBANKA_1337100	SF1	background/unknown	0.323654	0.285445	FALSE	10.462	10.6667	2.35824	2.45289	8.7753	8.53864	7.66992	7.47981
PBANKA_1211300	ATG18	background/unknown	0.317522	0.259791	FALSE	10.6599	10.8793	2.45075	2.20844	8.85434	8.78178	9.04576	5.96634
PBANKA_1000600	1000600	background/unknown	0.314581	0.423923	FALSE	2.24102	12.1246	11.0443	9.72143	11.0225	11.2759	10.964	10.4287
PBANKA_1211700	1211700	background/unknown	0.313409	0.269508	FALSE	8.84436	9.56592	2.16464	2.00271	7.58992	7.74205	6.36684	6.35707
PBANKA_1107200	CAF40	background/unknown	0.312405	0.266547	FALSE	10.9906	10.9037	2.46696	2.38281	8.92263	8.9772	8.15305	7.15736
PBANKA_0406800	PRPF19	background/unknown	0.310374	0.237104	FALSE	11.9219	12.0456	2.05898	2.3336	10.06	9.42358	8.7318	6.95188
PBANKA_0207000	SERCA	background/unknown	0.301242	0.344461	FALSE	11.1807	11.9897	2.03954	6.6313	9.81152	9.59507	10.0441	9.7843
PBANKA_1331400	MORC	background/unknown	0.296387	0.246411	FALSE	10.1444	10.6178	2.28864	2.40414	8.86398	8.80189	7.037	6.55751
PBANKA_0511400	nPrx	background/unknown	0.294493	0.199043	FALSE	15.2166	15.1843	2.2151	2.29335	12.977	12.3758	7.92564	9.53619
PBANKA_0607400	PPM11	background/unknown	0.293568	0.411031	FALSE	12.3352	10.6823	5.51183	4.19299	9.53464	9.90505	10.6999	9.96705
PBANKA_1220300	PARE	background/unknown	0.290127	0.23424	FALSE	10.8553	10.1624	2.44009	2.04132	8.48432	8.81695	6.55336	7.32432
PBANKA_1350700	cTrpRS	background/unknown	0.287788	0.254623	FALSE	9.22833	8.7346	2.26332	2.06826	6.92596	6.55147	6.57499	7.16399
PBANKA_1028700	RPN13	expression	0.28496	0.11586	FALSE	2.44612	2.41613	2.29065	9.60802	8.58434	0.166884	2.1787	9.49118
PBANKA_0826700	PV5	background/unknown	0.284343	0.176528	FALSE	2.42332	2.436	12.0213	9.52476	9.28226	9.66382	2.15879	11.053
PBANKA_1234800	RPS9	ribosome	0.282778	0.312331	FALSE	16.3676	16.3636	2.24524	10.8293	14.423	14.4332	13.7961	13.0721
PBANKA_0937700	RPL36	ribosome	0.281652	0.145772	FALSE	2.17107	2.42121	11.5051	12.2555	0.0722685	11.5864	12.2491	10.5576
PBANKA_0311000	SEC31	background/unknown	0.279552	0.219958	FALSE	11.4854	11.396	2.44052	2.22407	9.57276	8.86554	7.6062	7.39121
PBANKA_0906900	DNAJC7	background/unknown	0.275967	0.263402	FALSE	6.80874	8.87466	2.32752	2.27022	6.46216	6.51952	5.69534	5.87949
PBANKA_0105400	105400	background/unknown	0.273546	0.199446	FALSE	11.7753	11.7733	2.02773	2.33368	9.82002	9.2484	8.5347	6.13383
PBANKA_0931200	HSP101	background/unknown	0.27214	0.198921	FALSE	12.5675	12.4633	2.33119	2.47966	10.5975	10.7654	7.54879	7.12503
PBANKA_1458300	kinesin-13	background/unknown	0.271963	0.345156	FALSE	2.46802	6.08801	6.68091	7.82043	5.57391	5.38124	9.35128	7.53419
PBANKA_1027900	SMB1	background/unknown	0.270444	0.192816	FALSE	12.0687	12.3592	2.04699	2.3386	10.1609	10.0476	6.35733	8.18845
PBANKA_1202700	1202700	background/unknown	0.270237	0.203119	FALSE	10.9113	10.7869	2.11391	2.25812	9.11547	9.1411	7.21571	5.96864
PBANKA_1222100	1222100	background/unknown	0.268628	0.206911	FALSE	9.62698	10.4934	2.14834	2.02061	7.99478	8.43801	7.0934	5.73425
PBANKA_1414400	1414400	background/unknown	0.266876	0.236576	FALSE	8.86983	9.07144	2.02732	2.46997	7.07171	6.89205	6.68523	6.34908
PBANKA_1415000	PRP40	background/unknown	0.261354	0.208429	FALSE	10.8525	11.1954	2.44981	2.29147	9.08413	8.38836	7.39538	7.24175
PBANKA_0524300	524300	background/unknown	0.259645	0.202342	FALSE	11.7509	10.9955	2.4343	2.34435	8.98989	9.27759	6.92988	7.75511
PBANKA_1417300	SEC63	background/unknown	0.258594	0.210397	FALSE	8.28954	9.92855	2.0395	2.20296	7.45985	5.80815	7.34827	6.25356
PBANKA_0524200	ETRAMP	background/unknown	0.25818	0.147081	FALSE	14.2299	10.1931	2.33245	2.44562	11.4742	12.2917	8.74255	2.41521
PBANKA_0617200	RPS10	ribosome	0.257186	0.289462	FALSE	2.47754	11.999	10.5708	11.7999	7.38954	11.3556	12.9703	12.3224
PBANKA_0314500	RPS26	ribosome	0.247891	0.264168	FALSE	15.6236	15.7901	2.10582	10.8035	13.6272	13.5929	13.4726	11.9396
PBANKA_1234200	RPS24	ribosome	0.245477	0.288527	FALSE	15.0609	15.1161	2.48674	11.8582	13.1327	13.0543	13.4968	13.0962
PBANKA_1231500	USP2	background/unknown	0.244711	0.189302	FALSE	10.7845	10.6031	2.12636	2.42521	8.76659	7.99948	7.67726	6.29087
PBANKA_1463200	VPS26	background/unknown	0.244339	0.330649	FALSE	2.41475	7.56947	8.3583	9.20276	7.18808	7.26404	9.67648	8.50017
PBANKA_1123500	ISWI	DNA replication & repair	0.24174	0.277482	FALSE	9.59963	10.4146	2.29883	5.6581	8.37324	8.48891	8.84127	7.37016
PBANKA_0712900	HMGB2	background/unknown	0.2386	0.128847	FALSE	14.1203	13.8152	2.25996	2.08275	12.1235	12.7714	2.0601	11.1284
PBANKA_0831800	831800	background/unknown	0.234373	0.157605	FALSE	2.37898	2.30932	2.45908	2.32577	0.127385	4.3101	2.26338	4.44332
PBANKA_0617100	RPL11a	ribosome	0.234102	0.251894	FALSE	15.3379	15.5736	2.16916	11.0257	13.3777	13.3151	13.1667	12.0174
PBANKA_1320200	SCC3	chromatin architecture	0.227492	0.311719	FALSE	7.1258	6.22186	2.38686	4.85432	4.86637	5.16621	7.24311	6.82968
PBANKA_1358700	APC4	background/unknown	0.226521	0.181664	FALSE	9.58503	10.1191	2.38549	2.1083	7.76132	6.86521	6.83341	6.8519
PBANKA_1358600	IDH	background/unknown	0.225961	0.125855	FALSE	2.1671	2.48518	8.26061	7.16631	6.76124	0.146136	7.25214	9.32422
PBANKA_0415500	SEC27	background/unknown	0.22593	0.163487	FALSE	11.7884	11.8367	2.20616	2.47383	9.47017	8.88997	8.5609	6.18266
PBANKA_1109600	RSP9	KT_spindle_MTOC	0.223623	0.202438	FALSE	8.76395	7.23016	2.39018	2.29675	5.70895	5.24967	6.63071	6.55913
PBANKA_0523100	EIF4A3	expression	0.21857	0.155049	FALSE	11.0172	11.8755	2.42529	2.45129	9.71351	10.0201	6.56313	6.01505
PBANKA_0209200	PIESP15	background/unknown	0.215166	0.173193	FALSE	10.895	9.53744	2.41739	2.40999	7.77741	6.91367	7.232	7.39944
PBANKA_1434200	RRS	expression	0.214305	0.207127	FALSE	12.0168	12.4066	2.36945	5.59035	10.0323	9.80474	8.82583	8.90645
PBANKA_1302600	PRIM1	DNA replication & repair	0.213722	0.260487	FALSE	9.67433	8.71218	2.44787	6.83973	7.08517	7.46074	10.0393	7.5078
PBANKA_0616100	616100	background/unknown	0.20999	0.158988	FALSE	10.6394	11.2126	2.43848	2.27994	8.15299	8.65214	6.67107	7.25733
PBANKA_1103400	RPL31	ribosome	0.209882	0.21704	FALSE	14.4226	14.4215	2.11532	9.51082	11.9656	11.2112	12.2353	11.3954
PBANKA_1144100	ABCE1	background/unknown	0.207597	0.15173	FALSE	10.7622	10.3317	2.0156	2.49167	8.46205	8.59187	6.78387	5.72543
PBANKA_1400600	RhopH1A	background/unknown	0.206809	0.200083	FALSE	12.9773	11.2719	2.26376	6.36984	10.3535	10.6727	8.22334	8.70157
PBANKA_1227400	CNA	background/unknown	0.206669	0.0733486	FALSE	2.3733	8.71168	2.01582	2.2066	0.149648	0.461106	8.54282	8.51147
PBANKA_1105100	MSH6	DNA replication & repair	0.203244	0.421578	FALSE	11.3624	10.6784	5.63631	7.6314	9.22487	9.83285	11.274	10.3185
PBANKA_0924400	SNU13	background/unknown	0.195402	0.105534	FALSE	13.0773	11.164	2.02453	2.13975	11.1252	11.5084	2.49242	7.3997
PBANKA_1409600	MNS1	background/unknown	0.195109	0.176331	FALSE	2.00296	7.19106	11.5311	11.6049	6.59125	7.77225	11.5561	11.0922
PBANKA_1340300	1340300	background/unknown	0.194835	0.197555	FALSE	12.0506	12.3654	2.40297	6.73144	10.3118	10.5096	8.82648	8.75361
PBANKA_1449000	MiGS	background/unknown	0.189591	0.182384	FALSE	2.26655	8.80801	12.0697	12.2106	8.01525	7.75193	11.7757	12.7772
PBANKA_1303700	VAMP	background/unknown	0.186534	0.169704	FALSE	13.1749	13.4227	2.35302	6.30221	11.1802	10.8968	9.14853	8.89311
PBANKA_1434700	CHC	background/unknown	0.186475	0.127275	FALSE	11.1831	11.1098	2.39294	2.0787	9.12536	8.72842	7.40847	5.19527
PBANKA_0410600	RPL26	ribosome	0.18583	0.192893	FALSE	15.329	15.5874	2.30641	11.6862	13.5266	13.507	11.2885	12.7605
PBANKA_0833600	CSE1	background/unknown	0.182057	0.196465	FALSE	11.0378	11.3667	2.36123	6.68971	9.06465	8.68119	8.88214	9.05826
PBANKA_0929600	NOP56	background/unknown	0.181283	0.114022	FALSE	12.5904	12.8785	2.48765	2.07226	10.7068	10.6143	6.91315	5.8152
PBANKA_1120800	SRP68	background/unknown	0.180055	0.126421	FALSE	10.4418	10.1123	2.09982	2.1468	8.46605	7.20155	5.28607	7.14368
PBANKA_1023500	EIF3H	background/unknown	0.179934	0.204333	FALSE	10.8422	12.8141	2.41967	9.3006	9.95574	9.37447	10.8406	9.90482
PBANKA_1309700	DDX5	background/unknown	0.176012	0.119704	FALSE	12.581	12.1666	2.49526	2.3547	10.3292	9.14073	6.93172	7.03646
PBANKA_0817700	HoMu	background/unknown	0.176005	0.164887	FALSE	12.8651	12.8039	2.23678	7.13311	11.1272	11.2073	8.77389	8.47672
PBANKA_1457800	ARFGAP1	background/unknown	0.174309	0.187837	FALSE	12.191	2.00792	12.0797	10.6986	9.94112	10.1091	9.88178	11.794
PBANKA_1313800	SRP54	expression	0.174288	0.183453	FALSE	11.1568	11.9848	2.18893	7.58093	9.68025	8.95344	9.95336	8.55056
PBANKA_0602800	UBC	background/unknown	0.172104	0.18756	FALSE	11.3446	11.3828	2.2909	9.64842	9.3217	8.34736	11.9438	9.44607
PBANKA_1010600	CAM	background/unknown	0.169946	0.195028	FALSE	11.0867	2.32759	10.7693	11.3645	9.25874	9.06213	11.0465	10.6248
PBANKA_1014900	1014900	background/unknown	0.168305	0.144571	FALSE	12.7203	13.4829	2.27233	6.12678	11.2303	10.8533	9.13201	7.66833
PBANKA_1239200	RBG1	background/unknown	0.164191	0.11054	FALSE	11.9816	12.1336	2.25042	2.38987	9.8246	8.53047	7.32893	6.53758
PBANKA_0311800	ACS9	background/unknown	0.163208	0.0827342	FALSE	2.32163	6.51365	2.42155	2.46611	0.379667	5.72171	2.48617	6.77904
PBANKA_1338400	1338400	background/unknown	0.161414	0.176722	FALSE	2.13167	12.2059	12.6383	11.8225	10.8194	10.9645	10.7726	10.835
PBANKA_0709100	RPL22	ribosome	0.157958	0.161955	FALSE	14.5051	14.7935	2.37331	10.7171	12.4481	12.091	11.934	10.8206
PBANKA_0823100	SAMS	background/unknown	0.15629	0.132399	FALSE	13.7985	13.6781	2.01994	7.10553	11.6825	11.7667	8.69872	8.64204
PBANKA_0522900	BRR2	background/unknown	0.15591	0.104296	FALSE	10.8369	10.7707	2.442	2.05212	8.91218	8.6524	6.247	5.26893
PBANKA_0302500	HT1	background/unknown	0.155227	0.140693	FALSE	13.3344	12.2787	2.25715	6.84774	10.7564	10.8949	8.32006	8.69047
PBANKA_0937200	937200	background/unknown	0.147342	0.136095	FALSE	10.0227	10.2994	2.42281	5.10476	8.64342	8.85813	7.87717	5.46554
PBANKA_1008200	PKG	background/unknown	0.147142	0.16437	FALSE	10.6551	10.5496	2.4616	7.15471	8.83455	8.83651	8.60685	7.85242
PBANKA_0205200	205200	background/unknown	0.145435	0.104831	FALSE	9.47854	8.79208	2.11045	2.34735	7.18567	7.45132	6.13173	4.37037
PBANKA_1207000	NOP5	background/unknown	0.144342	0.0865231	FALSE	12.3212	12.9595	2.24811	2.27015	10.685	10.3338	6.58663	5.32913
PBANKA_1102200	MSP8	background/unknown	0.14395	0.122871	FALSE	14.2483	12.8353	8.00805	2.14231	11.6384	12.2598	7.0682	10.1742
PBANKA_0316000	RFC1	DNA replication & repair	0.142378	0.309205	FALSE	12.1671	11.0198	6.98398	8.82253	9.43048	9.52017	12.3687	11.7185
PBANKA_1201100	1201100	background/unknown	0.138123	0.104838	FALSE	8.98042	8.81551	2.19096	2.41674	6.94467	6.00329	6.98719	4.71943
PBANKA_0925400	DHC4A	KT_spindle_MTOC	0.135049	0.139355	FALSE	5.88574	4.45956	3.63109	5.60819	3.55579	3.09329	7.09124	7.7661
PBANKA_0938300	HSPJ2	background/unknown	0.13452	0.145018	FALSE	10.1049	9.74317	2.13789	6.93534	8.11452	7.72742	7.43573	8.47002
PBANKA_1345600	eEF-Tu	background/unknown	0.13206	0.136509	FALSE	9.0246	9.90836	2.33498	6.0478	8.17607	8.76627	6.82331	6.16851
PBANKA_1003400	UIS14	background/unknown	0.131379	0.0474657	FALSE	2.08806	2.02951	2.28958	2.18448	0.155994	0.246577	6.59634	2.41186
PBANKA_0912100	CK1	background/unknown	0.118668	0.220093	FALSE	13.9883	14.0162	8.07017	8.06654	11.9736	11.9518	12.4154	11.5846
PBANKA_1221600	1221600	background/unknown	0.118405	0.0768398	FALSE	7.95856	7.90836	2.08673	2.30591	6.10901	6.30674	7.4651	2.1116
PBANKA_0917500	SMC1	chromatin architecture	0.11636	0.174152	FALSE	10.4173	11.2155	5.02036	6.32485	8.82263	8.73571	9.76539	8.42435
PBANKA_0804100	804100	background/unknown	0.108583	0.0640747	FALSE	9.48835	10.7173	2.3886	2.41436	8.47688	8.6883	2.20817	7.5902
PBANKA_1244000	1244000	background/unknown	0.10728	0.11501	FALSE	10.6525	10.9355	2.32658	9.55775	9.16413	9.2745	9.89171	7.72595
PBANKA_0101000	101000	background/unknown	0.107055	0.110427	FALSE	12.7451	12.827	2.36215	10.5424	10.5953	10.6457	9.82546	10.3739
PBANKA_1416300	RPS19	ribosome	0.104579	0.203287	FALSE	15.7371	16.1299	9.3538	9.67676	13.9003	13.9436	13.7151	13.165
PBANKA_0418000	DDX60	background/unknown	0.0973738	0.0717757	FALSE	8.94483	8.95823	2.18842	2.48406	6.98467	6.52225	5.75109	4.89386
PBANKA_0943100	NOT1	background/unknown	0.0952009	0.0650389	FALSE	9.62579	9.75039	2.41537	2.41651	7.77981	7.63479	6.2408	4.20399
PBANKA_1321000	1321000	background/unknown	0.0918612	0.154434	FALSE	13.9835	13.7811	7.9954	7.63364	11.9612	11.9156	10.9986	11.3711
PBANKA_0105300	EDC4-like	background/unknown	0.0905499	0.0713887	FALSE	7.74973	7.11672	2.2734	2.25016	5.30824	5.38124	6.12502	3.83151
PBANKA_1202200	EFTUD2	background/unknown	0.0901195	0.058792	FALSE	10.3223	10.2881	2.24541	2.18916	8.13121	7.44095	5.54208	5.54512
PBANKA_1023900	GST	background/unknown	0.0883627	0.0402298	FALSE	2.01033	2.29602	11.8444	11.6418	0.0781396	7.45223	10.5453	11.4723
PBANKA_0801200	801200	background/unknown	0.0878054	0.0730015	FALSE	11.5307	12.3291	2.09385	6.38807	9.88053	9.45378	8.23934	6.79759
PBANKA_0611800	611800	background/unknown	0.0869903	0.0530256	FALSE	8.67113	9.39427	2.20178	2.42399	7.53526	6.9301	7.47582	2.1603
PBANKA_0803400	RPS28	ribosome	0.0868406	0.0401174	FALSE	13.2362	13.6303	2.45194	2.07141	11.3821	0.250511	11.4436	10.2611
PBANKA_1434100	DRPC	background/unknown	0.0841622	0.0819448	FALSE	8.5623	9.42083	2.25359	5.42415	7.8445	7.31955	6.23823	5.80009
PBANKA_1412100	1412100	background/unknown	0.0839399	0.0459028	FALSE	11.4712	11.6028	2.33032	2.24305	9.74193	9.28475	7.80412	2.47295
PBANKA_0109200	SPT5	DNA replication & repair	0.0838738	0.0519225	FALSE	7.06079	9.02504	2.00559	2.15444	6.59925	6.14032	6.45153	2.26667
PBANKA_1231200	PhLP1	background/unknown	0.0825548	0.0459848	FALSE	11.0642	10.5758	2.45863	2.12043	8.78253	9.03537	2.26837	7.67689
PBANKA_0612300	AKiT7/MAD1	KT_spindle_MTOC	0.0812193	0.0274186	FALSE	8.2372	2.13054	2.1788	2.41167	0.116685	0.112215	8.75356	6.84202
PBANKA_0403800	403800	background/unknown	0.0794734	0.0455323	FALSE	9.85049	9.84196	2.45852	2.29286	8.38856	8.87714	6.4683	2.09413
PBANKA_1242700	AP1B	background/unknown	0.0789649	0.0687595	FALSE	10.7095	10.3188	2.28673	5.58988	8.57598	8.83894	6.545	6.57123
PBANKA_1011400	TOP2	chromatin architecture	0.0757614	0.140007	FALSE	11.3206	10.419	6.30787	7.01079	8.83409	9.01491	10.1961	8.90345
PBANKA_0206500	RAB5c	background/unknown	0.074711	0.0375926	FALSE	12.5331	12.1181	2.21814	2.01938	10.4074	10.4416	7.42702	2.14812
PBANKA_1338300	RPL6	ribosome	0.0729635	0.157358	FALSE	14.6999	15.9773	9.37676	10.5671	13.4893	13.4727	13.5477	12.7373
PBANKA_0619200	PSOP1	background/unknown	0.0727856	0.059777	FALSE	2.33434	8.33072	11.8562	11.7814	7.20159	6.12728	11.3858	11.3629
PBANKA_1214200	1214200	background/unknown	0.0706284	0.0654247	FALSE	12.3355	12.1048	2.32272	8.71246	9.97514	10.211	7.42977	9.63942
PBANKA_0519900	519900	background/unknown	0.0700152	0.0565592	FALSE	11.656	11.8899	6.55619	2.08934	9.7859	9.78364	8.14135	6.08141
PBANKA_1429400	DYNLL2a	background/unknown	0.0668567	0.0300286	FALSE	2.11509	2.28467	10.6008	11.7036	6.42791	0.0485767	10.7719	10.7224
PBANKA_0919100	PV1	background/unknown	0.0640083	0.0362383	FALSE	9.90483	9.48593	2.17039	2.33232	8.0852	8.75236	2.40046	5.73941
PBANKA_0912200	SRP72	background/unknown	0.0602552	0.0378584	FALSE	9.93534	11.2952	2.43679	2.46616	8.85334	7.88054	4.89704	5.61719
PBANKA_0210600	USP	background/unknown	0.059608	0.0418625	FALSE	8.57297	9.81546	2.49834	2.33197	7.08229	6.22976	6.17339	4.71271
PBANKA_0401100	SRPK1	background/unknown	0.0594811	0.0583005	FALSE	8.72129	9.37121	2.20108	5.94786	7.25077	7.4212	6.90934	5.76464
PBANKA_0931300	DPAP1	background/unknown	0.0594675	0.0351233	FALSE	9.71825	7.52175	2.25739	2.05751	6.9082	7.47692	2.40215	5.6747
PBANKA_1324100	UCHL3	background/unknown	0.0587967	0.0327065	FALSE	8.23427	10.1349	2.02825	2.02736	7.06111	6.6561	7.57172	2.06866
PBANKA_1139400	DOA1	background/unknown	0.0586211	0.0582811	FALSE	9.46126	9.55466	6.532	2.26523	7.39391	6.21216	7.65858	7.7019
PBANKA_1120200	PDX1	background/unknown	0.0585851	0.0556738	FALSE	11.9506	12.6145	2.34532	9.29433	10.148	9.92889	8.68474	8.94363
PBANKA_1131600	MCM6	DNA replication & repair	0.0571789	0.21514	FALSE	11.378	10.8434	9.39392	9.72179	9.40328	10.05	12.0849	11.4703
PBANKA_1428700	EIF3A	expression	0.0570472	0.0817914	FALSE	14.2897	15.1884	7.19378	9.29187	13.0189	13.1905	11.0668	10.5415
PBANKA_0416000	RhopH3	background/unknown	0.0530773	0.0663954	FALSE	14.0041	12.944	6.64491	7.16589	11.6084	11.8745	8.70239	10.101
PBANKA_0710900	LSM3	background/unknown	0.0513968	0.025314	FALSE	12.3586	12.4681	2.12737	2.08136	10.3834	10.1742	2.02893	7.50194
PBANKA_0507300	DHC4B	KT_spindle_MTOC	0.0504053	0.0199655	FALSE	2.31029	2.12141	4.06252	5.21571	0.264675	0.129725	6.63323	7.16977
PBANKA_0610200	MCM5	DNA replication & repair	0.0497311	0.180336	FALSE	11.8359	12.3746	9.63275	10.0438	10.2676	10.8762	12.5278	11.7546
PBANKA_1323000	1323000	background/unknown	0.0464852	0.0191083	FALSE	2.22951	8.35786	2.46611	2.39915	7.35866	0.14148	6.15457	2.30392
PBANKA_1012800	1012800	background/unknown	0.0454782	0.0405268	FALSE	12.5319	12.3201	2.41343	7.96163	10.1392	9.43121	8.18158	8.60327
PBANKA_1334300	EXP2	background/unknown	0.0445657	0.067033	FALSE	13.4077	11.2849	7.60349	7.07208	10.755	11.3697	8.42336	10.0551
PBANKA_1455100	RFC4	DNA replication & repair	0.0436807	0.132334	FALSE	13.1633	12.6313	9.07622	10.7391	11.0768	11.3887	12.6914	11.8552
PBANKA_0314700	RFC2	DNA replication & repair	0.0434874	0.117369	FALSE	13.3211	12.8717	9.24364	10.1595	10.9231	11.0974	12.9589	12.0119
PBANKA_1019700	1019700	background/unknown	0.0358782	0.0256569	FALSE	11.1925	12.7443	2.09015	5.76649	10.2008	9.54732	7.00317	5.84281
PBANKA_1459900	SRPRB	background/unknown	0.0358346	0.0190863	FALSE	11.57	10.4932	2.42046	2.37299	9.37915	8.44721	7.70356	2.00219
PBANKA_0405500	RPL7	ribosome	0.0341466	0.0689243	FALSE	15.3847	15.8518	10.1142	10.273	13.6135	13.503	13.473	12.2706
PBANKA_0520200	AAC1	background/unknown	0.0334278	0.141243	FALSE	13.0948	10.3409	10.5465	11.5065	10.8946	11.3113	12.4759	11.8733
PBANKA_1225700	1225700	background/unknown	0.0328698	0.0182236	FALSE	8.90372	10.8971	2.41453	2.1657	8.36339	7.71148	6.54727	2.32072
PBANKA_1356700	Kelch13	background/unknown	0.032744	0.0131758	FALSE	2.2325	8.10932	2.09228	2.45226	7.27442	0.0122619	5.58675	2.35467
PBANKA_0928200	928200	background/unknown	0.0318051	0.0280343	FALSE	10.7418	11.3364	2.28328	7.46023	9.24592	9.02176	7.7589	6.50448
PBANKA_0717000	717000	background/unknown	0.0313995	0.029023	FALSE	11.205	11.4552	2.37147	9.24005	9.30666	9.46757	6.73094	9.52062
PBANKA_0807000	RPB1	expression	0.0294616	0.0231406	FALSE	9.47201	11.0353	2.29936	4.84987	8.41712	7.40055	6.72394	5.68551
PBANKA_1354400	RPL18	ribosome	0.0260405	0.0484122	FALSE	15.9321	16.1958	10.1021	10.4663	14.0241	14.0216	13.5553	12.0551
PBANKA_1308900	HRS1	background/unknown	0.0257122	0.0223118	FALSE	10.0755	10.5261	6.62596	2.09703	8.54519	8.08558	6.58329	6.6378
PBANKA_1003100	PRPF8	background/unknown	0.0253116	0.0153486	FALSE	10.0637	10.4711	2.31722	2.41694	8.29148	7.74082	5.08032	4.6036
PBANKA_0517500	BDP1	background/unknown	0.0241125	0.0126964	FALSE	10.0843	10.7439	2.07128	2.20596	8.41861	7.75934	7.3351	2.01556
PBANKA_1451600	UBA2	background/unknown	0.0237552	0.0116833	FALSE	7.97256	10.3043	2.31946	2.12817	7.50127	0.438233	7.90207	7.26017
PBANKA_1326800	RFC3	DNA replication & repair	0.0234941	0.0703499	FALSE	10.3768	10.8993	9.24929	10.0238	8.67982	9.35466	11.9724	11.2081
PBANKA_1332100	1332100	background/unknown	0.0227797	0.0130114	FALSE	10.195	7.49969	2.39879	2.38536	7.68256	7.08042	2.05525	6.01835
PBANKA_1241800	MCM3	DNA replication & repair	0.0213736	0.0698814	FALSE	12.078	11.233	9.41137	9.96967	9.77847	10.1217	12.1684	11.2607
PBANKA_1446800	CPN60	background/unknown	0.0208598	0.0165741	FALSE	13.2721	12.2817	2.24593	8.04022	10.6841	10.4456	6.89504	8.33711
PBANKA_1463000	G377	background/unknown	0.017541	0.0411828	FALSE	10.9944	11.0414	9.34502	10.2202	9.19849	8.68779	13.0467	11.1769
PBANKA_0823900	RPB3	background/unknown	0.0172556	0.00865545	FALSE	11.7555	12.0458	2.17686	2.35698	9.90338	9.22467	7.52312	2.02486
PBANKA_0803100	MCM7	DNA replication & repair	0.0161171	0.0520276	FALSE	12.0062	11.5162	9.83637	9.71362	9.74203	10.0864	12.0519	11.676
PBANKA_1222300	SEC28	background/unknown	0.0153488	0.00778421	FALSE	11.5241	11.4443	2.02759	2.2655	9.30174	9.07607	6.81863	2.35665
PBANKA_1120100	1120100	background/unknown	0.0146478	0.0146363	FALSE	9.59495	9.41229	2.43516	8.67034	7.2177	6.44522	8.4007	8.35641
PBANKA_1024900	MCM2	DNA replication & repair	0.0144508	0.0485267	FALSE	11.7518	11.3838	9.81895	10.0109	9.62584	10.0753	12.2903	11.4065
PBANKA_0604800	EIF3C	expression	0.0140028	0.0242782	FALSE	12.6429	13.5537	7.84262	8.59306	11.1705	10.8061	11.1938	9.87761
PBANKA_0912700	912700	background/unknown	0.0138796	0.00727096	FALSE	10.8153	10.3902	2.0096	2.23899	8.53164	8.18824	6.66686	2.31339
PBANKA_0619100	RPS5	ribosome	0.0138261	0.0412728	FALSE	12.9006	12.6896	10.6229	10.6005	10.7847	10.6986	13.7259	12.0551
PBANKA_0604200	604200	background/unknown	0.0135151	0.00827296	FALSE	8.89392	9.21537	2.41613	2.15405	7.15565	6.8403	5.82041	3.07658
PBANKA_1232500	EIF3B	expression	0.0123149	0.0212977	FALSE	13.6538	14.3003	8.333	9.18896	12.0897	11.764	11.4718	10.5403
PBANKA_0716000	SMC3	chromatin architecture	0.0104784	0.0191606	FALSE	11.3086	10.7291	7.01109	7.48952	8.95793	8.80267	10.4725	8.57155
PBANKA_1242800	EIF3E	expression	0.0102902	0.0152694	FALSE	13.1876	13.3646	7.62338	7.70186	11.2454	10.9706	10.3119	9.64922
PBANKA_1210200	PREBP	background/unknown	0.00986625	0.0130833	FALSE	13.8203	14.1251	7.2593	8.15624	12.0376	11.8792	10.077	9.66469
PBANKA_0830200	RhopH2	background/unknown	0.00918663	0.0149526	FALSE	13.4365	12.7324	7.87237	8.11479	11.1463	11.29	9.7703	10.2187
PBANKA_1350600	NUDC	background/unknown	0.0091476	0.00782923	FALSE	9.97663	11.1432	8.70332	2.04177	8.28618	5.88859	8.47739	9.41548
PBANKA_0602700	NAPL	background/unknown	0.00721161	0.0184213	FALSE	15.2965	14.4326	12.0568	10.0749	12.6781	12.7637	13.474	13.2049
PBANKA_0922100	RPS18	ribosome	0.00624419	0.0121005	FALSE	16.2537	16.5185	10.3199	11.4373	14.376	14.222	13.263	12.9048
PBANKA_0717800	RPL15	ribosome	0.00512785	0.0125063	FALSE	16.2462	16.5974	11.4742	12.1681	14.3652	14.4421	14.3664	13.5134
PBANKA_1354500	RPL18-2	ribosome	0.00155629	0.0030778	FALSE	17.7369	18.1007	11.8439	12.4005	15.8796	15.7103	14.9567	13.6002
PBANKA_0831000	MSP1	background/unknown	0.000127248	6.52512e-05	FALSE	11.9904	10.6108	2.4251	2.3685	9.25064	9.61599	2.43809	6.09247
PBANKA_0919300	919300	background/unknown	-0.000642376	0.0013423	FALSE	12.9214	11.6676	9.55191	7.70603	10.3229	10.2972	10.5881	10.6203
PBANKA_1426100	1426100	background/unknown	-0.00212383	0.00111777	FALSE	10.9439	10.7333	2.41327	2.41415	8.87492	8.66335	6.86644	2.06088
PBANKA_1018400	PRMT1	background/unknown	-0.00260631	0.00249106	FALSE	10.32	10.5889	2.46083	8.58794	8.40221	8.08302	6.91822	8.49654
PBANKA_0313800	ATPalpha	background/unknown	-0.00375982	0.00757329	FALSE	11.2461	10.1173	7.272	7.44085	8.63821	8.53536	9.94283	8.86599
PBANKA_0811600	811600	background/unknown	-0.00619361	0.00342545	FALSE	9.17982	9.93346	2.1318	2.15149	7.97449	7.69436	3.65739	3.9701
PBANKA_0942500	Trx-mero	background/unknown	-0.0064735	0.00309063	FALSE	2.36372	2.06897	10.5634	11.0846	6.04785	6.30238	2.09284	11.5209
PBANKA_1427200	PPM5	background/unknown	-0.0072084	0.00301717	FALSE	2.10084	2.48344	2.04805	7.0104	4.5057	0.183691	6.81509	2.07025
PBANKA_1206100	EIF3D	expression	-0.00771249	0.0164424	FALSE	13.1882	14.2783	9.36273	9.66422	12.027	11.9052	11.624	10.6893
PBANKA_1232200	SPT16	DNA replication & repair	-0.00830945	0.0259014	FALSE	13.2377	12.8316	10.169	10.1358	11.0154	11.1038	12.0674	11.9212
PBANKA_0310000	SIS1	background/unknown	-0.00931481	0.0290302	FALSE	12.6291	10.2004	9.30858	9.40236	10.1269	10.7246	10.0201	10.4015
PBANKA_0912300	TSN	background/unknown	-0.0103453	0.0226549	FALSE	12.8346	12.806	8.78962	8.9584	10.7174	10.584	11.4663	10.3109
PBANKA_1424200	1424200	background/unknown	-0.0113855	0.00985117	FALSE	11.3214	10.2435	2.27532	7.20049	8.40829	8.46487	7.4982	6.42533
PBANKA_0404300	404300	background/unknown	-0.0130876	0.00464166	FALSE	2.15904	2.12096	6.39515	2.02811	0.467124	0.0480728	4.64826	7.42507
PBANKA_1317500	GluPho	background/unknown	-0.0143467	0.0302223	FALSE	11.6351	12.0801	7.63221	8.48422	10.019	10.0948	9.71225	9.61138
PBANKA_1228000	1-CysPxn	background/unknown	-0.0177035	0.0410565	FALSE	13.0687	13.09	8.95663	9.62362	11.5271	11.7417	10.3777	10.5468
PBANKA_1402600	1402600	background/unknown	-0.0177659	0.0474286	FALSE	10.6374	8.17674	8.84211	8.744	7.6826	8.16901	9.90246	10.2006
PBANKA_1209000	eIF2beta	background/unknown	-0.0179035	0.040807	FALSE	13.1855	12.825	8.45773	9.83623	11.1247	11.3031	10.6039	10.7264
PBANKA_1106700	RPL4	ribosome	-0.0186113	0.0402719	FALSE	16.8115	17.1599	11.5186	12.1619	14.996	15.0073	14.2615	12.6482
PBANKA_1324400	RPL27	ribosome	-0.0201985	0.0467679	FALSE	16.0755	16.5349	11.2462	11.7102	14.1991	14.0646	13.864	12.6667
PBANKA_0827500	NADSYN	background/unknown	-0.0202952	0.0106519	FALSE	10.6565	10.6895	2.22243	2.2236	8.56167	8.52924	2.35448	5.98631
PBANKA_0936500	RFC5	background/unknown	-0.0215748	0.0910358	FALSE	13.6232	12.5826	11.061	10.9608	11.2076	11.5096	12.621	12.1736
PBANKA_1449400	SF3B3	background/unknown	-0.0222131	0.0132832	FALSE	4.0742	3.37643	2.09685	2.2876	4.16277	0.305356	4.99452	2.1916
PBANKA_1415600	MCM4	DNA replication & repair	-0.0229414	0.0752012	FALSE	12.2643	11.5169	10.0541	10.505	9.75824	9.84887	12.5086	11.5251
PBANKA_0941800	H2B	background/unknown	-0.0230646	0.0904978	FALSE	16.0981	14.8358	12.8184	12.5715	13.4816	13.9034	13.327	14.7185
PBANKA_0718800	SAR1	background/unknown	-0.0252293	0.066695	FALSE	13.3353	11.943	8.74177	10.1525	10.9882	10.8805	11.1917	10.3464
PBANKA_1006100	FEN1	DNA replication & repair	-0.0271327	0.0154269	FALSE	8.40771	2.13906	6.5412	6.3825	0.103418	5.97766	9.20741	7.74471
PBANKA_0514500	RPN9	expression	-0.0276742	0.0536843	FALSE	13.418	13.5984	9.21677	8.60202	11.5714	11.6033	9.84792	10.9607
PBANKA_1204900	1204900	background/unknown	-0.0281623	0.0471457	FALSE	13.3386	13.5629	8.50869	8.59363	11.7284	12.1829	9.97322	9.26869
PBANKA_0414600	RPS15A	ribosome	-0.0296591	0.0807803	FALSE	15.8624	16.0538	11.8113	11.5906	13.8852	13.7469	13.7772	12.7831
PBANKA_1305300	SSRP1	DNA replication & repair	-0.0300168	0.109066	FALSE	13.2319	12.8592	10.1016	10.4377	11.1863	11.335	11.5345	11.6144
PBANKA_0404600	AHA1	background/unknown	-0.0300315	0.0650459	FALSE	12.4995	11.345	8.54909	7.9853	10.4427	10.4123	9.0635	9.62856
PBANKA_0105600	IF-2	expression	-0.0300898	0.0470398	FALSE	12.0471	12.3086	7.00407	7.61714	10.3167	10.1965	9.48026	8.17884
PBANKA_0720300	EIF3M	background/unknown	-0.0303498	0.0607501	FALSE	13.9225	14.6704	9.20305	9.78095	12.3232	12.1685	10.9202	11.1746
PBANKA_0511900	RPL3	ribosome	-0.0309652	0.0863993	FALSE	14.8981	15.1101	10.8108	11.5123	13.0584	13.2656	13.0595	11.8365
PBANKA_1033900	RPS8	ribosome	-0.0358952	0.0857844	FALSE	16.9664	17.1812	11.817	12.4272	15.0887	15.0333	13.6713	13.1637
PBANKA_1028400	RPL10	ribosome	-0.0360613	0.103318	FALSE	13.8421	14.2511	10.1909	10.9912	11.98	11.5955	13.0925	11.391
PBANKA_1134200	1134200	background/unknown	-0.0363729	0.0625129	FALSE	13.399	13.3856	8.56758	8.05757	11.3951	11.1949	9.52826	10.2107
PBANKA_0941900	H4	background/unknown	-0.0379759	0.292207	FALSE	17.1375	16.2405	14.764	14.8561	14.9956	15.3986	15.5149	15.4524
PBANKA_1019500	RPL5	ribosome	-0.0382005	0.106008	FALSE	15.6728	15.6142	11.5396	11.4124	13.6367	13.5349	13.1914	12.4588
PBANKA_0906400	RPL35e	ribosome	-0.0383241	0.0838659	FALSE	15.5745	17.0794	10.996	12.1814	14.6589	14.7908	12.9438	11.9742
PBANKA_0917400	PF16	background/unknown	-0.0383264	0.0976299	FALSE	9.61181	9.11548	9.50739	9.43886	7.83261	7.34697	10.635	10.8714
PBANKA_1209800	PMSB5	background/unknown	-0.0385702	0.0322639	FALSE	7.46699	2.26082	11.3939	11.4679	6.72994	7.01111	8.01533	9.97348
PBANKA_0811300	811300	background/unknown	-0.0390093	0.11045	FALSE	12.6337	12.5497	9.45153	9.04276	10.4765	10.4043	10.7246	10.9072
PBANKA_1329300	RPS3A	ribosome	-0.0400774	0.173901	FALSE	15.435	15.5779	12.3866	12.948	13.5208	13.4902	14.4128	13.3801
PBANKA_1143600	AlaRS	background/unknown	-0.0405386	0.0393921	FALSE	10.2576	10.4426	2.37538	8.20393	8.26672	6.85851	7.45145	7.83615
PBANKA_0605400	605400	background/unknown	-0.0409197	0.0203651	FALSE	10.7217	11.0572	2.01131	2.04491	8.6745	8.82734	2.05848	5.55231
PBANKA_0938600	CK2alpha	background/unknown	-0.0415277	0.170905	FALSE	12.008	12.5925	9.87969	9.96674	10.4974	10.5432	11.1133	11.0319
PBANKA_1423600	RPS16	ribosome	-0.0416138	0.152643	FALSE	15.1669	15.3043	12.2746	11.9648	13.0987	12.7841	14.3766	12.8956
PBANKA_0903600	DYN1	background/unknown	-0.0427306	0.074878	FALSE	14.1478	14.431	8.61097	9.59983	12.3133	12.2483	11.2377	9.62492
PBANKA_0401500	401500	background/unknown	-0.0433418	0.0629357	FALSE	11.9355	11.5763	6.31495	6.97239	9.6444	9.56834	8.37634	8.12096
PBANKA_1229200	RPL19	ribosome	-0.0434946	0.226646	FALSE	13.8363	14.4207	12.5634	12.1304	12.2387	12.5005	14.1746	12.4643
PBANKA_0942900	FRS1beta	background/unknown	-0.043807	0.0681295	FALSE	11.556	11.2372	6.04991	7.38262	9.31695	9.38623	8.23329	8.2058
PBANKA_1032100	RAP1	background/unknown	-0.0441458	0.0217845	FALSE	11.3926	10.644	2.00738	2.4271	9.06213	9.76066	4.59829	2.25231
PBANKA_1115200	GEP	background/unknown	-0.0449575	0.152524	FALSE	11.8135	9.98863	10.5119	10.7404	9.0198	9.31333	11.6933	11.7069
PBANKA_1401300	RPS7	ribosome	-0.045981	0.129889	FALSE	15.2167	15.2757	10.6632	12.4124	13.4226	13.6795	13.1281	11.6575
PBANKA_0307000	RPL37e	ribosome	-0.0464637	0.105047	FALSE	16.9071	17.1276	11.8007	11.7548	14.8479	14.8259	13.2048	12.8863
PBANKA_0508100	CHD1	background/unknown	-0.0469942	0.0261187	FALSE	8.84071	9.50973	2.20316	2.00089	7.21556	6.97578	5.5831	2.05721
PBANKA_1411300	EIF4G	expression	-0.0475435	0.0864588	FALSE	12.2335	12.7742	7.22488	8.70719	10.6183	10.3362	9.47676	9.18125
PBANKA_0940900	RUVB2	background/unknown	-0.0483729	0.101458	FALSE	13.134	13.3005	8.38715	9.28122	11.2057	11.1967	10.173	10.0732
PBANKA_0834400	QCR1	background/unknown	-0.0483931	0.121105	FALSE	11.9174	10.0422	8.15509	7.85611	9.17093	9.39918	8.5934	9.55477
PBANKA_0715900	USP13	background/unknown	-0.049378	0.139742	FALSE	10.7637	10.7116	8.64631	7.26638	9.0517	9.15522	9.02	8.9031
PBANKA_1456100	RPS17	ribosome	-0.0501612	0.238779	FALSE	15.6134	15.9554	13.1345	12.9292	13.7949	13.8019	14.6079	13.4584
PBANKA_0823000	823000	background/unknown	-0.0517512	0.102335	FALSE	12.6056	11.1068	8.05689	7.87812	10.0627	10.4598	9.40972	8.31818
PBANKA_1019400	RPL7-3	ribosome	-0.0520158	0.121786	FALSE	16.6382	16.8736	11.675	12.0003	14.806	14.8632	13.1356	12.3573
PBANKA_1237800	MDR1	background/unknown	-0.0520757	0.0782245	FALSE	12.6451	11.8725	7.11843	6.99208	10.176	9.97502	8.73697	8.37063
PBANKA_1321200	VPS4	background/unknown	-0.0525403	0.0489237	FALSE	9.09523	10.1127	2.11325	7.70642	7.79091	6.77117	7.80327	5.62412
PBANKA_1453300	ACS11	background/unknown	-0.0525492	0.15231	FALSE	11.5252	10.8246	8.35988	8.24329	8.99851	9.20669	9.27907	10.0755
PBANKA_1018600	RPL21	ribosome	-0.0525723	0.136192	FALSE	16.3073	17.0335	12.2028	11.9919	14.6951	14.6557	13.6382	12.4876
PBANKA_0614500	EIF3I	expression	-0.0532368	0.123509	FALSE	13.6476	13.9411	9.71209	9.23353	11.7451	10.7652	11.5079	10.8302
PBANKA_1432500	1432500	background/unknown	-0.0547906	0.02478	FALSE	2.23504	6.74306	2.15836	2.19463	5.47391	0.151675	5.16796	2.04075
PBANKA_1231700	RPL2	ribosome	-0.0563425	0.154901	FALSE	15.7147	16.018	11.9081	11.4045	13.9247	13.9572	13.0265	12.0287
PBANKA_0721700	RANBP1	background/unknown	-0.0564393	0.203534	FALSE	8.50042	11.4546	10.5492	9.33288	9.32481	9.69436	8.79376	10.4958
PBANKA_1220200	1220200	background/unknown	-0.0566703	0.0291791	FALSE	11.4619	8.78793	2.34665	2.26071	8.75439	8.3868	4.67914	2.07937
PBANKA_1126500	ACS	background/unknown	-0.0569174	0.0573636	FALSE	12.6382	12.4563	5.99823	5.78264	10.7057	10.4894	6.29246	7.96134
PBANKA_1445400	SEC13	background/unknown	-0.0571343	0.23281	FALSE	8.74885	10.3116	8.06394	8.78903	8.11938	7.89205	9.47503	9.03245
PBANKA_1423500	RPL13-2	ribosome	-0.0574353	0.192785	FALSE	13.6742	13.7386	10.1181	11.3921	11.7261	11.0454	12.8599	11.3822
PBANKA_0803600	803600	background/unknown	-0.0585883	0.114207	FALSE	11.7869	11.6936	7.34	7.65247	9.80288	9.22833	8.82295	9.0877
PBANKA_1317400	P23	background/unknown	-0.0588521	0.300048	FALSE	13.092	12.8005	10.9365	11.2885	10.8999	10.9228	11.7812	12.5902
PBANKA_0618900	618900	background/unknown	-0.05894	0.172041	FALSE	13.6177	13.3129	10.0284	9.7594	11.5758	11.5509	10.89	10.8314
PBANKA_0203800	FRS1alpha	background/unknown	-0.0600045	0.0322449	FALSE	9.71604	10.107	2.38029	2.25189	8.38508	8.13709	4.90353	2.03321
PBANKA_1236300	DDX1	DNA replication & repair	-0.0600496	0.0337912	FALSE	9.88934	10.2722	2.34489	2.31317	7.89515	7.17336	6.5557	2.1835
PBANKA_0110400	EIF3L	expression	-0.0601069	0.0927311	FALSE	13.544	13.4206	7.84436	8.34789	11.5648	11.6924	8.70971	9.42883
PBANKA_0810600	810600	background/unknown	-0.061081	0.0359363	FALSE	8.73266	8.68324	2.14223	2.29453	6.86846	7.14173	4.53316	2.40343
PBANKA_1438000	PKAr	background/unknown	-0.0611551	0.0285621	FALSE	2.03463	2.29691	10.51	9.94411	0.4079	5.54645	8.195	9.60765
PBANKA_1202400	RPL13	ribosome	-0.0612434	0.115825	FALSE	15.4658	15.7903	10.2859	10.2809	13.6494	13.5352	12.1623	10.3221
PBANKA_0605300	EIF5	expression	-0.0621118	0.0297001	FALSE	8.2352	11.2551	2.08342	2.2719	8.73551	0.451868	7.06676	6.58666
PBANKA_0830000	830000	background/unknown	-0.0630135	0.237725	FALSE	10.3961	11.5494	8.67651	8.84431	9.29413	9.01733	9.38696	10.0813
PBANKA_1427700	RUVB1	background/unknown	-0.0637176	0.197623	FALSE	9.78216	11.0327	7.88426	8.80983	8.82852	7.98251	10.1549	8.92254
PBANKA_1425100	KARalpha	background/unknown	-0.0646234	0.210704	FALSE	13.2791	14.0705	10.2296	10.3788	11.7662	11.2924	11.3863	11.4123
PBANKA_1238800	KARbeta	background/unknown	-0.0665716	0.272013	FALSE	15.1327	15.2626	12.0384	11.9756	13.1625	13.022	13.1716	12.5996
PBANKA_1338600	RPL23	ribosome	-0.0667515	0.374271	FALSE	14.9951	15.6164	12.6933	13.002	13.4795	13.5739	13.7026	13.005
PBANKA_0503600	RPL30e	ribosome	-0.0675613	0.198393	FALSE	16.9014	17.2538	12.3647	13.058	15.0739	14.9622	13.6456	13.1706
PBANKA_0408600	EIF3K	expression	-0.0683798	0.126783	FALSE	13.921	14.1862	8.72465	9.14315	11.9533	11.8049	9.97059	10.1179
PBANKA_0916100	916100	background/unknown	-0.0696299	0.273358	FALSE	11.3628	9.89785	10.8938	10.1803	8.7595	9.50501	10.15	11.9254
PBANKA_0407600	AS	background/unknown	-0.070849	0.252533	FALSE	13.2336	13.1949	10.2604	9.95679	11.138	11.1849	11.2612	10.8262
PBANKA_0107400	OAT	background/unknown	-0.0720082	0.240524	FALSE	14.9659	14.3353	11.1924	11.0894	12.6575	12.6786	11.4918	12.2437
PBANKA_1355100	RPS6	ribosome	-0.072399	0.278753	FALSE	16.0643	16.0283	12.4895	12.79	14.1165	14.0559	13.758	12.6335
PBANKA_0906500	RPL28	ribosome	-0.074393	0.172301	FALSE	16.7269	16.9568	11.5773	11.9258	14.7232	14.6712	12.9057	12.0126
PBANKA_1318400	6PGD	background/unknown	-0.0745832	0.298605	FALSE	15.5715	15.7943	12.2182	12.5204	13.7689	13.6532	13.1808	12.6748
PBANKA_1326400	GAPDH	background/unknown	-0.0758243	1.10454	FALSE	18.1149	17.5333	16.8494	16.7362	15.8607	16.0989	16.7029	17.0264
PBANKA_1017900	PEPC	background/unknown	-0.0760738	0.163618	FALSE	11.3613	11.1543	8.1212	6.81478	9.20513	8.88571	8.62943	8.80759
PBANKA_1331900	eIF4A	background/unknown	-0.0778795	0.656205	FALSE	16.0908	15.998	13.9949	14.2141	14.2567	14.5346	13.8956	14.4422
PBANKA_1305100	RPL1	ribosome	-0.0786622	0.425462	FALSE	13.1382	12.6378	11.129	10.8773	10.8819	11.3512	12.3103	10.7034
PBANKA_0604300	TRP1	background/unknown	-0.0789271	0.42174	FALSE	14.3009	12.3476	13.6634	13.5178	11.3583	12.0651	13.3551	14.1854
PBANKA_1422400	1422400	background/unknown	-0.0791788	0.147547	FALSE	11.013	11.6307	6.66576	7.52049	9.31733	9.03364	8.14122	8.371
PBANKA_0909600	ApiAP2	background/unknown	-0.0802515	0.0534682	FALSE	7.62042	6.71894	2.17595	2.02451	5.34352	4.68637	5.29246	2.21434
PBANKA_0412800	eIF4E	background/unknown	-0.0817234	0.512266	FALSE	14.0474	13.7117	11.9376	11.604	11.9421	12.0598	12.5466	11.9269
PBANKA_1111400	INO1	background/unknown	-0.0819764	0.043204	FALSE	11.1679	11.6836	2.38163	2.27853	8.9976	8.75881	2.25377	5.98177
PBANKA_0719300	DHFR-TS	background/unknown	-0.082105	0.177514	FALSE	10.2751	9.8152	6.64555	7.21833	8.25214	7.97173	6.765	9.08687
PBANKA_1031900	eIF2gamma	background/unknown	-0.0829431	0.311569	FALSE	13.4471	13.1551	10.2224	10.3928	11.2643	11.5107	10.5258	11.2785
PBANKA_1362900	KRS1	background/unknown	-0.0832211	0.291915	FALSE	13.7983	13.8067	10.2918	10.7945	11.9677	11.8279	11.0387	11.1277
PBANKA_1210800	HGPRT	background/unknown	-0.0840389	0.320176	FALSE	17.1976	17.0809	13.7221	13.3894	15.2029	15.1947	13.0987	14.4199
PBANKA_1127800	DnaJA	background/unknown	-0.0844704	0.284926	FALSE	10.8316	10.9952	8.42132	7.97376	9.18731	8.88386	8.90728	9.06977
PBANKA_1013100	RPL14	ribosome	-0.0848288	0.208445	FALSE	16.4488	16.8188	11.4246	12.2547	14.5879	14.5402	12.6319	11.9351
PBANKA_1406800	RPS27	ribosome	-0.0856766	0.322063	FALSE	16.3679	16.2234	12.811	12.4089	14.0747	13.9598	13.4801	12.9634
PBANKA_1025200	CBF5	background/unknown	-0.0866039	0.0425324	FALSE	11.7643	12.3692	2.22232	2.32367	10.1621	9.68441	2.21724	4.94476
PBANKA_1137900	PCNA1	background/unknown	-0.0867145	0.839005	FALSE	12.2488	12.7559	12.6383	12.4804	10.7168	11.6505	12.1118	12.7204
PBANKA_0610900	HSP40	background/unknown	-0.0869288	0.508109	FALSE	15.0572	15.402	12.6766	12.7604	13.2288	13.1114	13.4204	12.867
PBANKA_1403800	GCN1	background/unknown	-0.0870395	0.0511324	FALSE	9.40749	9.28494	2.49261	2.24783	7.23296	7.14808	5.65189	2.02801
PBANKA_1116800	BFR1	background/unknown	-0.0870419	0.282129	FALSE	13.5091	13.7513	10.0398	10.5258	11.8105	11.847	10.8822	10.4861
PBANKA_1023400	GR	background/unknown	-0.0872951	0.0637027	FALSE	9.08041	10.0825	7.08044	2.28163	7.96443	8.39458	2.0304	8.46072
PBANKA_1127700	NAPRT	background/unknown	-0.0878881	0.240557	FALSE	13.0888	13.1912	9.20986	9.54806	11.2475	10.7748	9.97114	10.3827
PBANKA_1217700	DOZI/DDX6	background/unknown	-0.088489	0.880681	FALSE	15.8104	14.9929	14.029	14.3055	13.3638	13.3769	14.5113	14.3674
PBANKA_1232100	SR1	background/unknown	-0.0886112	0.148964	FALSE	15.7443	15.4062	9.8124	9.6621	13.5437	13.5095	10.3851	10.1708
PBANKA_1206900	TUBB	background/unknown	-0.0894037	0.955976	FALSE	16.9985	16.9691	17.001	16.8839	15.0353	14.9691	16.9454	16.8256
PBANKA_0615200	CDPK4	background/unknown	-0.0895776	0.445853	FALSE	13.6827	11.5977	12.4994	12.8368	10.8216	10.7893	13.1782	12.7803
PBANKA_1121700	LRS1	background/unknown	-0.0897835	0.228539	FALSE	11.3583	12.0197	7.6907	8.71564	9.79975	9.56499	9.1397	8.8794
PBANKA_0807600	RPS11	ribosome	-0.0903042	0.365562	FALSE	15.5472	16.0744	12.6554	12.7505	13.9381	13.8256	13.859	11.9445
PBANKA_0930300	930300	background/unknown	-0.0907526	0.709391	FALSE	16.217	15.7234	13.8092	13.8925	13.8841	14.0869	14.1399	13.895
PBANKA_1113000	PNP	background/unknown	-0.0909211	0.702828	FALSE	17.6169	17.6379	15.3012	15.218	15.6458	15.6511	15.2524	15.2075
PBANKA_0919900	PFK11	background/unknown	-0.0911391	0.417553	FALSE	11.3007	9.63693	9.18052	9.58185	8.44353	8.73979	9.73566	10.3507
PBANKA_0918000	RPP0	ribosome	-0.0918903	1.00705	FALSE	14.1085	13.8531	13.0836	12.7859	12.1553	12.1039	13.0939	13.1563
PBANKA_1364200	RPL17	ribosome	-0.0922711	0.215373	FALSE	14.8903	15.6548	11.0051	11.9069	13.4365	13.5426	13.7472	9.4189
PBANKA_0306800	UAP56	background/unknown	-0.0932211	0.580992	FALSE	14.4831	13.9386	11.883	12.1049	12.3615	11.9379	12.3005	12.5303
PBANKA_1126400	1126400	background/unknown	-0.0935564	0.168497	FALSE	11.5326	12.0591	7.04141	7.30886	9.59635	8.98375	8.70257	8.27693
PBANKA_0401800	401800	background/unknown	-0.0938333	0.0575992	FALSE	8.21903	9.31471	2.37374	2.4284	6.50487	5.01954	7.19446	2.2105
PBANKA_1441100	HAD2	background/unknown	-0.0941685	0.662527	FALSE	12.8902	11.7223	11.4841	12.126	10.4442	10.7804	11.4208	12.5302
PBANKA_1231800	RPL12	ribosome	-0.0945658	0.443062	FALSE	16.1964	15.9475	13.0539	12.9513	14.0367	14.1702	13.1035	13.1493
PBANKA_0522700	TUBA2	background/unknown	-0.0949145	0.474442	FALSE	15.8564	15.8416	16.9685	17.1031	13.8504	13.6921	17.1035	16.9358
PBANKA_1448200	1448200	background/unknown	-0.0952392	0.0648782	FALSE	7.96881	8.22516	2.0224	2.33116	5.99653	5.43116	4.25921	3.548
PBANKA_0939600	PAIP1	expression	-0.0954609	0.155889	FALSE	9.07558	9.58714	4.57679	6.70395	7.58748	6.82314	7.1304	6.48525
PBANKA_1137800	GAC	background/unknown	-0.0960212	0.35705	FALSE	13.3657	14.0114	10.3585	10.7139	11.7533	11.4061	11.3493	10.8211
PBANKA_1334100	PMSB2	background/unknown	-0.0983749	0.487805	FALSE	12.5551	12.2512	9.96023	10.6347	10.728	11.1438	9.71456	10.8222
PBANKA_1237900	QCR2	background/unknown	-0.0989079	0.433689	FALSE	11.1195	9.53239	8.59153	9.29053	8.36337	8.32614	9.47849	9.81272
PBANKA_1122900	HK	background/unknown	-0.0991326	0.396241	FALSE	14.5654	15.1393	11.7472	11.6814	12.942	12.7462	11.3902	12.5265
PBANKA_0109100	TK	background/unknown	-0.0991628	0.336973	FALSE	12.7904	12.4164	9.21913	9.88253	10.3121	9.97364	9.98287	11.0967
PBANKA_1452300	1452300	background/unknown	-0.0999571	0.0560662	FALSE	10.1126	10.4245	2.44855	2.4006	8.3149	8.11879	4.8527	2.40057
PBANKA_1360300	ALBA4	background/unknown	-0.0999813	1.32473	FALSE	15.6927	15.2742	14.9318	14.7657	13.4693	13.8059	14.2242	15.1033
PBANKA_0926600	GCN20	background/unknown	-0.100797	0.0849337	FALSE	8.28703	8.34122	2.38166	6.57245	6.60147	6.99681	7.79923	2.45848
PBANKA_0924900	ERF3	background/unknown	-0.101513	0.594216	FALSE	11.3152	12.1103	10.0756	9.87619	9.82663	9.73673	10.8359	10.0308
PBANKA_0203000	CAF1C	background/unknown	-0.101536	0.801722	FALSE	14.2473	13.5249	14.1912	14.0285	11.8361	12.6138	13.218	14.5188
PBANKA_0708000	SEC23	background/unknown	-0.102507	0.150474	FALSE	12.0339	11.8209	6.58976	6.78637	9.99091	8.98189	8.49454	7.21
PBANKA_1437300	GRP94	background/unknown	-0.104608	0.458879	FALSE	13.2914	10.8284	13.4546	13.1126	10.7935	10.9106	12.0113	13.4265
PBANKA_0418200	RAB7	background/unknown	-0.104847	0.400039	FALSE	13.1299	12.8361	9.71422	10.4069	10.8412	11.1207	10.0527	10.8421
PBANKA_1009100	1009100	background/unknown	-0.104955	0.252276	FALSE	11.5852	11.6676	7.73522	8.07467	9.56023	9.17565	9.26544	8.3205
PBANKA_0707400	707400	background/unknown	-0.105528	0.837646	FALSE	12.2812	11.7115	10.5404	10.5498	10.092	10.2097	10.8765	10.7248
PBANKA_1347700	IRS1	background/unknown	-0.105622	0.309014	FALSE	11.0764	11.5079	8.26783	8.06462	9.34496	8.37174	9.34229	9.1104
PBANKA_1340400	LDH2	background/unknown	-0.105673	0.630685	FALSE	13.6538	13.405	14.2354	14.09	11.6161	11.7439	13.5766	14.536
PBANKA_0943600	RPP1	ribosome	-0.106839	0.733173	FALSE	15.3151	15.8446	12.6819	14.7708	13.5963	13.4382	13.539	13.8551
PBANKA_1359200	ALBA2	background/unknown	-0.107997	0.557535	FALSE	12.6288	10.616	12.2827	11.8849	10.0172	11.2127	10.2598	12.5032
PBANKA_0828000	TIS11-like	background/unknown	-0.10848	0.425901	FALSE	9.57753	9.61273	7.88332	8.11694	7.73631	8.08482	9.51191	7.30845
PBANKA_0510900	RPS2	ribosome	-0.108551	1.43214	FALSE	14.3342	14.1296	13.0916	13.0491	12.3251	12.5151	12.7939	13.0128
PBANKA_0941500	RPS4	ribosome	-0.109087	0.317802	FALSE	15.2005	15.3519	10.674	11.8018	13.2106	13.0624	11.5173	11.3761
PBANKA_0942700	SNF2L	DNA replication & repair	-0.109276	0.0627553	FALSE	9.4911	9.88368	2.10172	2.21675	7.45408	6.75369	5.33446	2.42268
PBANKA_1039600	RPN6	expression	-0.109462	0.178923	FALSE	12.156	11.8417	8.43912	6.31815	10.0099	10.0125	7.38384	8.51698
PBANKA_1010800	CAF16	background/unknown	-0.109898	0.477683	FALSE	12.5316	13.1213	10.724	10.4031	10.844	10.7413	9.74076	12.0229
PBANKA_1016300	1016300	background/unknown	-0.110071	0.85326	FALSE	12.3018	10.8593	11.1936	12.0117	9.91986	10.3254	11.2342	11.4809
PBANKA_1426900	DBP1	background/unknown	-0.110189	0.653729	FALSE	13.199	13.2593	10.9731	11.1384	11.4215	11.4656	11.4179	10.6934
PBANKA_0816400	PFK9	background/unknown	-0.110422	0.323283	FALSE	14.2311	14.516	10.4499	10.5706	12.3675	12.1243	10.4196	11.1892
PBANKA_1459300	ACT1	background/unknown	-0.110736	1.43092	FALSE	16.4948	16.0625	15.0262	14.7077	14.2751	14.2648	14.586	14.5629
PBANKA_1117700	MDH	background/unknown	-0.110903	1.05225	FALSE	14.0628	13.4701	12.8735	12.6467	11.5967	11.7477	13.1062	12.6769
PBANKA_1028300	PP1	background/unknown	-0.111248	0.477389	FALSE	11.7966	11.8712	9.29238	9.57789	9.81914	10.1003	9.07564	10.3862
PBANKA_1303800	TIM	background/unknown	-0.111905	0.936313	FALSE	14.535	13.712	13.6323	13.6855	12.1097	12.1761	12.7794	14.3525
PBANKA_0616700	NEK4	background/unknown	-0.112017	0.5936	FALSE	11.2728	10.1807	9.61822	10.0067	8.68888	9.18609	10.9479	9.18683
PBANKA_1420600	H2B.Z	background/unknown	-0.11238	0.264405	FALSE	14.8009	14.2391	9.77487	10.818	12.4306	12.6664	11.3945	9.42196
PBANKA_1217600	H2A.Z	background/unknown	-0.113594	0.605902	FALSE	16.5487	16.1913	13.6103	13.4994	14.3217	14.4963	13.4027	13.0973
PBANKA_0103300	103300	background/unknown	-0.113664	0.0605985	FALSE	10.1661	10.8704	2.11382	2.38593	8.55557	8.30724	4.2572	2.4815
PBANKA_0505100	ARF1	background/unknown	-0.113924	0.951271	FALSE	14.8962	14.0065	12.6716	12.6457	12.3892	12.5437	12.4635	12.7067
PBANKA_0107300	CCT6	background/unknown	-0.114155	0.718531	FALSE	14.4668	14.9312	12.283	12.3961	12.786	12.4793	12.2038	12.4939
PBANKA_1211000	GMPS	background/unknown	-0.114296	0.816618	FALSE	12.7073	12.518	10.6096	11.1917	10.5547	10.7236	10.7249	11.4414
PBANKA_1235600	SAHH	background/unknown	-0.115371	0.47484	FALSE	15.756	16.1632	12.8895	12.5176	14.0053	13.8062	11.9798	13.1292
PBANKA_1325600	ValRs	expression	-0.117427	0.0727455	FALSE	9.78553	9.49917	2.04343	2.30526	7.49341	4.17209	4.83766	5.28282
PBANKA_0929900	HSP90	background/unknown	-0.117852	0.48835	FALSE	9.62726	8.92963	8.73445	7.97597	7.4359	7.69149	7.61088	9.76262
PBANKA_0716500	716500	background/unknown	-0.118538	0.0414484	FALSE	2.11064	5.68703	2.08323	2.17182	0.474639	0.271193	7.91919	2.43699
PBANKA_1351800	RPN3	expression	-0.118652	0.262161	FALSE	12.9013	13.0865	8.59119	8.68278	10.8051	10.4743	8.74811	9.8186
PBANKA_1009500	1009500	background/unknown	-0.119415	0.425546	FALSE	8.35033	8.7218	7.46332	8.14395	6.6179	6.75084	9.32437	7.39026
PBANKA_1406700	CPSII	background/unknown	-0.119541	0.244366	FALSE	12.7316	13.615	8.64165	8.63176	11.2917	10.7398	9.14372	8.97613
PBANKA_1435200	FD4	background/unknown	-0.119855	0.461309	FALSE	11.3575	10.7281	9.03347	9.25185	8.68223	8.31503	10.7943	9.36098
PBANKA_0417500	RPL32	ribosome	-0.11987	0.592632	FALSE	14.9421	15.0588	11.9794	12.6133	13.0466	13.1129	12.4834	11.5979
PBANKA_1306200	tRIP	background/unknown	-0.120805	1.29459	FALSE	12.4816	12.4686	11.4606	11.2973	10.6652	10.4828	11.3473	11.3805
PBANKA_0711900	HSP70	background/unknown	-0.120975	2.48954	FALSE	17.8825	17.5804	16.9453	16.6225	15.7373	15.8251	15.9095	16.0064
PBANKA_0405200	CCT2	background/unknown	-0.121035	1.10492	FALSE	15.1035	14.8334	12.9264	13.4845	13.0237	12.8821	12.7005	13.2072
PBANKA_0712600	14-3-3I	background/unknown	-0.12105	2.05044	FALSE	17.2396	16.8055	16.0123	15.7606	15.014	15.277	15.1305	15.0993
PBANKA_1456200	rabGDI	background/unknown	-0.121243	0.812554	FALSE	13.0273	12.6561	11.1519	10.7403	10.6466	10.6277	11.0867	11.3796
PBANKA_0211500	PMSA5	background/unknown	-0.122153	0.539627	FALSE	13.5896	14.3026	10.909	11.5999	12.0423	12.1965	10.6203	11.4502
PBANKA_1025500	1025500	background/unknown	-0.123219	0.0936565	FALSE	6.42365	6.80799	2.40219	2.10955	5.00614	5.13156	3.75417	2.39898
PBANKA_0404800	404800	background/unknown	-0.123477	0.403769	FALSE	9.73172	8.29563	10.4995	10.4886	7.44747	8.10165	9.86593	10.4001
PBANKA_1458000	1458000	background/unknown	-0.1236	0.0495036	FALSE	2.0487	2.25416	2.02691	2.25567	0.0273767	0.32835	2.06999	5.45481
PBANKA_1301300	CITH	background/unknown	-0.123932	1.00343	FALSE	14.3403	13.5389	14.4688	14.2403	11.9004	12.1723	13.6572	14.2001
PBANKA_1135100	RPS15	ribosome	-0.124258	0.896078	FALSE	14.0021	12.8934	12.2299	12.0988	11.7846	11.7606	12.7266	10.7253
PBANKA_0715600	RPT3	expression	-0.125858	0.54585	FALSE	13.6932	13.1899	11.0605	10.3264	11.526	11.4333	10.3423	10.936
PBANKA_0927800	927800	background/unknown	-0.127059	0.0800813	FALSE	8.97068	8.71886	2.44332	2.05569	6.33597	5.68827	2.42778	5.86595
PBANKA_1132400	1132400	background/unknown	-0.127512	0.0665647	FALSE	2.39894	2.29429	2.37457	2.46296	0.488887	0.207733	4.49574	3.53218
PBANKA_1239900	ACS10	background/unknown	-0.12808	0.605997	FALSE	13.2557	12.6641	10.344	10.4239	10.7979	11.1274	10.3204	10.4758
PBANKA_1125600	PK	background/unknown	-0.128113	1.96221	FALSE	15.8604	15.8994	14.7744	15.0794	13.9104	13.6481	14.1192	14.7004
PBANKA_1340100	LDH	background/unknown	-0.128924	1.78522	FALSE	16.6041	16.1861	16.2817	16.4482	14.5868	14.7983	14.3435	16.1904
PBANKA_1145800	MAHRP1a	background/unknown	-0.129548	0.615128	FALSE	16.3964	16.0175	13.4296	12.7921	14.0312	13.9771	12.8146	12.777
PBANKA_0308600	NRS1	background/unknown	-0.129812	0.621719	FALSE	14.191	14.1005	11.4633	11.4343	12.1299	12.0108	10.744	11.8995
PBANKA_1214300	ENO	background/unknown	-0.129925	1.67881	FALSE	16.6685	15.9365	15.876	16.1674	14.2857	14.3907	14.4058	15.9986
PBANKA_1016700	LRR	background/unknown	-0.129996	1.29612	FALSE	14.9349	14.18	12.8047	13.2615	12.5627	12.8261	12.328	12.7096
PBANKA_0310900	CCT8	background/unknown	-0.130136	1.04526	FALSE	13.647	14.1087	11.7689	12.3804	11.8431	11.6783	11.736	12.1705
PBANKA_0502200	RPN5	expression	-0.131741	0.52809	FALSE	14.0513	13.7898	11.2263	10.5405	11.8963	11.5925	10.3998	11.3899
PBANKA_0406500	CCT7	background/unknown	-0.132368	1.01798	FALSE	14.5844	14.8554	12.7309	12.6922	12.8123	12.6669	11.9951	12.5789
PBANKA_1030100	ACT2	background/unknown	-0.132395	0.841379	FALSE	12.3592	11.2793	11.4729	11.4222	9.73221	9.57899	11.4613	11.6808
PBANKA_1118600	CDC48	background/unknown	-0.132625	1.37776	FALSE	14.0031	13.899	12.5441	12.3468	11.9551	11.9315	11.9131	12.3565
PBANKA_1237600	1237600	background/unknown	-0.133353	0.0902345	FALSE	7.83032	8.32722	2.44798	2.40728	6.03318	5.4128	5.62033	2.09127
PBANKA_1003800	1003800	background/unknown	-0.133905	1.17481	FALSE	13.0356	12.6203	11.4385	11.43	10.8446	10.7894	10.7843	11.805
PBANKA_0619900	OLA1	background/unknown	-0.134249	0.361925	FALSE	12.0364	11.6147	7.72399	9.2609	9.73493	9.53887	8.17759	9.57382
PBANKA_0408400	408400	background/unknown	-0.135233	1.17801	FALSE	11.1957	12.3249	11.3906	11.4774	9.92274	9.84936	11.1569	11.3088
PBANKA_0704700	704700	background/unknown	-0.138123	0.573368	FALSE	11.1396	10.4389	12.5725	12.5964	9.25614	9.62152	11.8875	11.7142
PBANKA_1219300	HSP110c	background/unknown	-0.138228	1.09914	FALSE	14.8294	14.7008	13.274	12.514	12.7882	12.7362	11.9467	12.7929
PBANKA_1444100	CCT3	background/unknown	-0.138556	0.961245	FALSE	14.9267	15.2049	12.7186	12.9795	13.0894	12.7823	12.065	12.7807
PBANKA_0814200	EF-1beta	background/unknown	-0.13975	1.45954	FALSE	13.6315	14.2799	12.8356	12.4558	11.9487	12.0523	11.6847	12.6052
PBANKA_0821700	821700	background/unknown	-0.1398	1.28358	FALSE	11.9269	12.2844	10.6738	10.7781	10.2847	10.253	10.0834	10.8248
PBANKA_0104400	NDK	background/unknown	-0.140111	0.0620917	FALSE	2.35162	5.55412	2.22941	4.6189	0.36908	0.24193	6.80542	5.97211
PBANKA_0417700	TUBA1	background/unknown	-0.140466	2.05501	FALSE	13.4994	13.6736	12.912	12.698	11.6266	11.6908	12.5952	11.9736
PBANKA_1130500	PMSA7	background/unknown	-0.14112	0.609549	FALSE	14.2517	13.7895	11.1444	11.5119	11.9986	12.0016	10.074	11.899
PBANKA_0808200	PMSA3	background/unknown	-0.141469	0.748149	FALSE	13.6542	13.386	11.2743	11.0783	11.4923	11.5478	10.1955	11.5438
PBANKA_1206600	RPT4	expression	-0.141936	0.673034	FALSE	12.4135	12.1091	10.0309	9.61358	10.303	10.3178	9.43488	9.97307
PBANKA_1439200	PABP1	background/unknown	-0.142607	1.69154	FALSE	13.8053	13.2129	12.3741	12.6615	11.5328	11.6472	11.5002	12.4744
PBANKA_1329700	RPN2	expression	-0.143623	0.75455	FALSE	11.3169	11.2349	9.57369	8.83351	9.43371	9.27416	8.87739	9.49261
PBANKA_0835300	835300	background/unknown	-0.144752	0.607255	FALSE	12.4268	12.6643	10.458	9.30934	10.6282	10.1995	9.55224	10.1962
PBANKA_1216500	CYP19A	background/unknown	-0.144891	1.54454	FALSE	15.9356	15.7489	14.049	14.6303	13.8352	14.0547	13.0236	13.6824
PBANKA_1117400	1117400	background/unknown	-0.144953	0.104692	FALSE	12.4814	11.7365	2.35865	9.65195	10.1152	9.95621	2.24822	10.4457
PBANKA_0823400	PGK	background/unknown	-0.145229	1.58503	FALSE	15.3393	14.745	15.0337	14.8198	13.0115	13.1661	13.0646	14.9557
PBANKA_0303600	RPN1	expression	-0.145408	0.496752	FALSE	12.7691	12.5755	9.32907	9.87952	10.6567	10.4914	8.8731	10.2603
PBANKA_0518700	MRS1	background/unknown	-0.145422	0.569886	FALSE	11.4395	11.8479	8.51998	9.38518	9.66214	9.28475	9.04703	9.24884
PBANKA_1452600	1452600	background/unknown	-0.145537	1.60487	FALSE	13.7532	14.0428	12.5326	12.367	11.9544	11.9721	11.8108	11.9019
PBANKA_0919000	RPN7	expression	-0.146133	0.45961	FALSE	12.6894	12.2902	8.72269	9.69689	10.5356	9.95825	8.95253	9.77219
PBANKA_0304900	SERA3	background/unknown	-0.146257	0.0787156	FALSE	10.829	7.55964	2.43038	2.49591	7.7082	8.15491	2.32089	2.88318
PBANKA_0312400	RPB2	background/unknown	-0.146758	0.167931	FALSE	7.92341	8.91487	2.43524	6.87187	6.57761	5.55898	6.12651	5.35345
PBANKA_1330300	1330300	background/unknown	-0.146798	0.0960854	FALSE	8.3628	8.38779	2.33739	2.40128	6.2503	6.21952	4.74157	2.19885
PBANKA_1214700	1214700	background/unknown	-0.147383	1.25226	FALSE	12.0807	11.2416	11.479	11.5235	9.63289	9.78731	11.422	10.9838
PBANKA_0833000	PFN	background/unknown	-0.148102	0.495822	FALSE	12.4365	8.75995	13.1584	12.8766	9.95132	10.7436	10.6772	11.2512
PBANKA_1362000	ERS1	background/unknown	-0.148294	0.672033	FALSE	12.7296	12.7973	9.70109	10.5016	10.7266	10.3181	10.2489	9.96902
PBANKA_1218200	CCT5	background/unknown	-0.148652	2.09554	FALSE	13.5745	13.4862	12.5127	12.734	11.768	11.712	11.3889	12.3172
PBANKA_0916200	TCP1	background/unknown	-0.149808	1.10267	FALSE	15.0276	15.1908	12.9919	12.981	13.1226	12.994	12.255	12.2776
PBANKA_1461800	RPT6	expression	-0.14988	1.02491	FALSE	12.8634	12.9703	11.0418	10.8472	11.0296	11.001	10.3623	10.6207
PBANKA_1205000	GBP2	background/unknown	-0.15016	0.681793	FALSE	15.6864	15.8476	12.7428	12.7126	13.7281	13.5744	11.8515	12.2019
PBANKA_0917900	RPT5	expression	-0.150244	0.833634	FALSE	12.908	12.1306	10.4371	10.2401	10.5469	10.5767	9.74668	10.3241
PBANKA_1010500	HOP	background/unknown	-0.1508	1.10148	FALSE	13.5209	13.51	11.5587	11.7019	11.5659	11.5445	10.6403	11.5494
PBANKA_0914300	914300	background/unknown	-0.151055	1.96461	FALSE	13.2276	12.6145	11.9605	11.966	11.0464	11.0595	11.0509	11.6644
PBANKA_1032700	CELF2	background/unknown	-0.152014	1.3026	FALSE	13.0396	13.6926	12.021	11.6994	11.5612	11.6621	11.5244	10.6593
PBANKA_1328100	1328100	background/unknown	-0.152749	0.50212	FALSE	11.1783	10.5925	8.04848	8.05586	8.92919	8.22828	7.92544	8.9871
PBANKA_1131900	PP5	background/unknown	-0.153167	0.597662	FALSE	11.1844	11.3844	8.4848	8.8026	9.37915	9.14073	8.42184	8.89984
PBANKA_1410400	1410400	background/unknown	-0.153528	1.38859	FALSE	13.0489	12.8039	11.3104	11.4154	11.0204	11.0455	10.5366	11.0721
PBANKA_0703900	RACK1	background/unknown	-0.155166	1.73176	FALSE	15.9248	15.7225	14.4686	14.2567	13.828	13.9531	12.959	13.4763
PBANKA_1320900	TRX1	background/unknown	-0.155262	0.933017	FALSE	13.3323	13.3476	11.8196	11.696	12.0004	12.0753	9.79892	11.1995
PBANKA_1410000	RPT1	expression	-0.155348	0.605786	FALSE	13.3094	12.8026	10.3577	9.90042	10.9791	10.8707	9.45153	10.3351
PBANKA_1221200	RPL34	ribosome	-0.155463	0.091077	FALSE	14.4477	15.0538	2.00083	9.99378	0.391983	11.9947	12.8591	12.0112
PBANKA_1429600	PRS	background/unknown	-0.156525	0.424241	FALSE	10.5996	10.6545	7.78634	7.54941	8.86738	9.07135	6.94024	7.94879
PBANKA_1134100	CCT4	background/unknown	-0.15655	1.1316	FALSE	15.1103	15.1121	13.0628	13.0227	13.0448	12.97	11.739	12.7638
PBANKA_0107100	PMSA2	background/unknown	-0.15665	1.51043	FALSE	13.7492	13.2248	12.0696	12.2098	11.476	11.4943	10.9199	12.0895
PBANKA_1314800	eEF2	expression	-0.156708	1.34569	FALSE	15.968	16.1162	14.0934	14.201	14.0431	13.954	13.3099	12.8569
PBANKA_1430800	Trx-Px2	background/unknown	-0.157627	0.0720513	FALSE	2.18251	2.4817	2.41141	7.91082	0.283213	4.49516	6.41866	2.23828
PBANKA_0819900	NAPS	background/unknown	-0.157931	3.00793	FALSE	13.798	13.8023	13.6845	13.292	11.9117	12.3153	11.9198	12.7709
PBANKA_1308600	ALDO2	background/unknown	-0.158541	1.47303	FALSE	15.3719	15.0549	16.0448	15.847	13.1262	12.9912	14.4434	15.2723
PBANKA_1454800	FD1	background/unknown	-0.1588	0.0683468	FALSE	2.35123	2.45556	2.43978	2.36814	0.381632	0.14256	5.80195	2.28642
PBANKA_1352000	EF-1gamma	background/unknown	-0.159866	2.13816	FALSE	14.2794	15.1311	13.9634	13.6292	13.0102	12.8851	12.1819	12.9467
PBANKA_1145500	NCBP1	background/unknown	-0.160088	0.0868944	FALSE	9.8084	10.5457	2.27611	2.29968	8.27805	7.90305	2.12149	4.00892
PBANKA_1319200	AP1G	background/unknown	-0.161464	0.0949853	FALSE	8.50426	9.5524	2.11755	2.10494	6.89452	6.18068	4.7232	2.12176
PBANKA_1036600	1036600	background/unknown	-0.162615	0.953007	FALSE	12.2289	12.1858	10.3488	10.0628	10.1956	10.2608	9.21037	10.3811
PBANKA_0818900	BIP	background/unknown	-0.163727	0.958876	FALSE	14.2869	12.3054	14.8099	14.511	11.6071	12.011	12.1651	14.1314
PBANKA_0905000	RPS21	ribosome	-0.163737	1.43005	FALSE	14.6682	14.4447	13.0483	12.4598	12.4406	12.334	11.9151	12.071
PBANKA_1138200	RUVB3	background/unknown	-0.165086	1.05079	FALSE	12.2153	12.7006	10.6477	10.5148	10.2706	9.52391	10.7798	10.5218
PBANKA_1364300	1364300	background/unknown	-0.166047	1.46765	FALSE	13.4207	12.8962	11.7042	11.6309	11.0962	11.1504	10.4802	11.527
PBANKA_1301400	PMSA1	background/unknown	-0.167363	0.660111	FALSE	14.6464	13.8392	11.7571	11.6734	12.3238	12.5454	9.44817	11.9123
PBANKA_1210900	1210900	background/unknown	-0.168253	0.773715	FALSE	10.2223	11.5366	11.994	11.6913	8.94226	8.87595	11.1687	11.4547
PBANKA_1432200	MDV1	background/unknown	-0.168346	0.514974	FALSE	11.0729	10.0678	13.1135	12.1619	8.64719	8.89188	11.3028	12.462
PBANKA_1214000	HSP60	background/unknown	-0.168466	0.792658	FALSE	12.0469	9.91443	11.2998	9.63995	9.33189	9.61993	8.47131	10.7497
PBANKA_1137000	BLN	background/unknown	-0.16905	0.664286	FALSE	11.1739	8.94072	10.3209	10.7593	8.364	8.06688	9.17489	11.0341
PBANKA_1404900	RPT10B	expression	-0.169131	1.16947	FALSE	12.7822	12.9711	10.8658	10.9459	10.7954	10.4515	10.197	10.8595
PBANKA_0403000	RPL44	ribosome	-0.169735	0.119419	FALSE	14.5079	14.5245	2.35499	13.3956	12.4927	12.4926	12.4017	2.42535
PBANKA_1204400	ALBA3	background/unknown	-0.169981	2.32917	FALSE	15.2012	15.2943	14.6135	14.6471	13.2325	13.7225	12.3507	13.8088
PBANKA_1460400	FKBP35	background/unknown	-0.17037	2.3836	FALSE	12.5285	11.8118	11.7958	11.6056	10.5871	11.0559	10.0302	10.7508
PBANKA_1112300	RAB1b	background/unknown	-0.171155	0.649963	FALSE	12.8273	12.5077	9.76932	9.86993	10.5701	10.7851	8.96228	9.62549
PBANKA_1424300	1424300	background/unknown	-0.171441	0.395357	FALSE	14.5879	14.9488	9.77427	10.6845	12.6758	12.1628	9.14141	10.4138
PBANKA_1348900	1348900	background/unknown	-0.171877	0.833093	FALSE	11.012	10.7389	8.14482	10.085	8.90223	8.60266	8.58654	9.39896
PBANKA_1022300	1022300	background/unknown	-0.172535	1.39098	FALSE	11.0045	10.3175	11.0416	11.3203	8.68982	9.3159	10.5498	10.2045
PBANKA_1222900	RPN10	expression	-0.173052	1.71907	FALSE	11.5163	11.7606	10.5752	10.1223	9.85809	9.79077	9.59413	9.76082
PBANKA_0407700	RPP2	ribosome	-0.173435	1.03698	FALSE	14.3106	14.6334	12.0609	12.4791	12.4489	12.3978	11.8256	10.7534
PBANKA_1302800	TPx1	background/unknown	-0.175174	2.53214	FALSE	14.83	13.9169	15.2451	14.8687	12.5529	12.8315	13.4203	13.3258
PBANKA_0210200	DRS1	background/unknown	-0.175331	0.408846	FALSE	10.6147	10.2979	7.28544	6.94867	8.34432	7.72454	6.42397	8.63182
PBANKA_0212100	eIF2alpha	background/unknown	-0.176864	0.446183	FALSE	12.8822	12.9887	9.52532	8.92199	10.8616	10.9686	8.03365	9.3411
PBANKA_0938400	ERC	background/unknown	-0.180292	0.780682	FALSE	10.7946	9.87024	11.2884	10.5181	9.19468	9.53235	7.58958	11.1654
PBANKA_1450200	SHMT	background/unknown	-0.181765	1.24547	FALSE	12.2168	11.4502	11.8183	12.3194	9.54129	9.71382	10.9239	11.9668
PBANKA_1309500	1309500	background/unknown	-0.182526	0.487912	FALSE	11.429	11.285	7.92186	8.57029	9.53647	9.52981	7.00909	8.47152
PBANKA_0930900	UCH54	background/unknown	-0.183176	0.112677	FALSE	8.7493	10.1741	5.92615	2.30192	7.83917	0.092628	6.8212	9.16101
PBANKA_1312700	GEST	background/unknown	-0.183497	1.31487	FALSE	11.4548	10.9682	12.2976	11.5603	9.1376	9.58031	11.0061	11.0294
PBANKA_1034400	PM4	background/unknown	-0.183685	1.4651	FALSE	14.5616	13.6886	12.8934	12.6042	12.1946	12.4882	10.7048	11.9346
PBANKA_0405400	RPS12	ribosome	-0.184572	0.938009	FALSE	14.7678	14.6524	12.2255	12.3606	12.7736	12.8336	11.1065	10.807
PBANKA_1008800	1008800	background/unknown	-0.185375	0.711541	FALSE	10.2629	10.3233	10.9502	11.0618	8.52888	8.05972	9.01295	11.8602
PBANKA_0513600	ADA	background/unknown	-0.186482	0.670962	FALSE	12.4736	11.9922	10.1708	10.2621	10.5258	10.8941	7.54212	10.4925
PBANKA_0204200	204200	background/unknown	-0.186792	0.770698	FALSE	14.0725	9.91891	11.8726	11.6776	10.4531	9.73514	10.1477	11.432
PBANKA_0404700	GRX1	background/unknown	-0.188945	0.950956	FALSE	12.8071	11.9261	14.5608	14.1317	10.4502	10.8943	13.2324	12.2908
PBANKA_0910200	PPM2	background/unknown	-0.191145	1.38154	FALSE	10.8878	10.697	9.30188	9.09246	8.97507	8.65715	8.45451	8.9314
PBANKA_1202100	1202100	background/unknown	-0.194984	0.48016	FALSE	10.609	10.6192	7.39495	7.26874	8.644	8.52679	7.72027	6.46354
PBANKA_1144000	RPN11	expression	-0.195924	1.39783	FALSE	11.3009	11.8691	9.70735	10.3234	9.44257	8.8764	9.55139	9.84448
PBANKA_1113400	PSOP12	background/unknown	-0.199714	0.458911	FALSE	12.3038	9.08919	12.0338	12.0904	8.71754	7.03412	12.0939	11.7873
PBANKA_0611600	RRM1	background/unknown	-0.200643	0.498323	FALSE	10.2211	9.80908	12.9348	12.6587	8.10087	8.05919	11.1936	12.3464
PBANKA_1346600	QRS1	background/unknown	-0.203361	2.49585	FALSE	10.4911	10.7428	9.51528	9.89076	8.8374	8.7817	8.75718	8.9205
PBANKA_1322700	DBP5	background/unknown	-0.20513	0.318002	FALSE	11.7983	11.4347	6.37027	7.03112	9.43036	8.91248	6.12009	7.31594
PBANKA_0609900	609900	background/unknown	-0.205441	0.975564	FALSE	12.8905	13.5666	10.5282	10.9685	10.9986	9.47943	11.1308	9.98017
PBANKA_1309900	LAP	background/unknown	-0.206088	0.848624	FALSE	11.468	11.6624	9.93664	9.07514	9.48584	9.07355	7.67345	10.2995
PBANKA_1145900	MAHRP1b	background/unknown	-0.206301	0.562329	FALSE	13.4561	13.227	10.8422	9.05186	11.2399	11.1644	8.02122	9.94546
PBANKA_1117000	H2A	background/unknown	-0.208376	0.131879	FALSE	12.2888	2.25137	11.3447	11.21	10.8981	0.0341543	11.0737	10.1001
PBANKA_1425000	PPIL4	background/unknown	-0.20935	0.115661	FALSE	9.48759	8.59577	2.40873	2.22865	7.50518	7.54833	2.36656	2.23171
PBANKA_0601100	PIC	background/unknown	-0.210493	0.0713837	FALSE	2.21694	10.0288	2.36905	2.48101	0.119084	0.132377	9.04322	5.48025
PBANKA_1433500	1433500	background/unknown	-0.212017	0.0898966	FALSE	8.24843	2.17414	2.03461	5.96852	0.40592	0.466322	7.68854	7.34665
PBANKA_1450300	ATPbeta	background/unknown	-0.214264	1.69892	FALSE	11.5818	10.0185	9.59167	10.1422	8.72595	8.61896	9.12488	9.15964
PBANKA_1004000	cGLO2	background/unknown	-0.215869	1.00929	FALSE	11.2412	11.0486	9.78303	8.6603	9.32345	9.53165	7.82917	8.38803
PBANKA_1425400	1425400	background/unknown	-0.218135	0.148528	FALSE	7.97429	7.84662	2.20738	2.25838	5.69228	5.59704	3.85314	2.2975
PBANKA_0702800	702800	background/unknown	-0.218201	2.28637	FALSE	13.8277	12.9968	13.7563	13.4092	11.4232	11.6028	10.7281	12.6577
PBANKA_0214000	DHC1	KT_spindle_MTOC	-0.219255	0.288447	FALSE	7.75487	7.20342	3.06397	6.57797	5.06811	4.8342	7.19133	4.03817
PBANKA_0402100	GCP3A	background/unknown	-0.220604	0.100066	FALSE	2.28675	8.24912	2.14521	2.37711	0.369554	4.51723	6.02386	2.01239
PBANKA_0802300	802300	background/unknown	-0.223025	0.1416	FALSE	7.62896	8.95726	2.11131	2.23324	6.4477	5.17211	4.19804	2.11495
PBANKA_1135700	CELF1	background/unknown	-0.223957	1.02775	FALSE	13.1884	13.1618	10.514	10.6719	11.1269	10.6105	9.72358	9.24004
PBANKA_1032300	CTPS	background/unknown	-0.228955	0.206008	FALSE	5.88534	5.99234	2.09717	7.24473	4.15652	4.41063	2.33407	7.20444
PBANKA_0941100	941100	background/unknown	-0.229179	1.05829	FALSE	11.7806	11.5124	9.3655	9.42462	9.54279	9.69537	8.09724	8.56658
PBANKA_1242000	USP14	background/unknown	-0.229254	0.194929	FALSE	9.48831	8.91038	2.30843	6.44295	7.44834	7.09359	2.31709	6.30206
PBANKA_0824700	TRXR	background/unknown	-0.231075	0.906875	FALSE	8.4853	7.49593	10.0537	9.66858	6.69932	6.9854	8.61048	8.12414
PBANKA_1440700	UBA1	background/unknown	-0.232467	1.44282	FALSE	10.1593	9.44203	9.61475	9.69872	7.93372	8.22595	7.25887	9.70492
PBANKA_0410300	RPN12	expression	-0.235853	1.20767	FALSE	11.816	11.7304	9.61456	10.207	9.70436	10.2348	8.49713	8.39097
PBANKA_1444000	MIF	background/unknown	-0.236274	1.79219	FALSE	14.8884	15.0502	12.9922	13.7751	12.8062	12.7237	11.4532	11.1566
PBANKA_1126200	DJ1	background/unknown	-0.241467	2.39552	FALSE	14.3126	13.9452	13.3159	12.631	11.9319	11.8197	10.7053	11.3941
PBANKA_1226500	PMSB4	background/unknown	-0.246537	2.36322	FALSE	12.0301	11.5894	11.8672	11.4401	9.73409	9.04502	9.8352	10.9411
PBANKA_0914400	UIS24	background/unknown	-0.2484	1.41107	FALSE	13.4336	11.9699	14.3853	11.398	10.8744	11.2402	9.73919	11.2367
PBANKA_0833100	M18AAP	background/unknown	-0.251145	1.17436	FALSE	9.86881	8.92434	10.5359	9.39134	7.28873	7.04921	8.55912	9.63694
PBANKA_1213600	CysRS	background/unknown	-0.251397	1.43599	FALSE	10.1199	11.078	10.9056	11.2628	8.73901	7.77102	9.29185	10.6294
PBANKA_0615400	615400	background/unknown	-0.251936	1.13442	FALSE	10.9224	11.282	9.65963	9.24666	9.10278	8.7115	6.99811	9.71106
PBANKA_0919800	919800	background/unknown	-0.254651	0.154891	FALSE	10.14	8.84158	2.32017	2.04616	6.02119	5.64841	5.8981	2.00231
PBANKA_0832600	PMSB6	background/unknown	-0.261561	0.838295	FALSE	13.2053	13.4825	10.3191	11.5959	11.1766	10.9934	7.28815	11.0856
PBANKA_1233500	PUF1	background/unknown	-0.263162	0.110543	FALSE	7.81674	2.29767	2.02513	7.07261	0.33783	0.138949	8.5963	6.93563
PBANKA_1228200	GDH3	background/unknown	-0.264387	1.28792	FALSE	10.4166	10.9199	8.89819	8.39431	8.85355	8.00532	7.52945	7.77235
PBANKA_1450700	CARP	background/unknown	-0.268231	1.40474	FALSE	12.4952	12.0745	10.5955	9.95944	10.1234	10.045	8.60168	8.69851
PBANKA_1365500	IBIS1	background/unknown	-0.270444	1.19212	FALSE	13.5871	12.5901	11.2477	10.7925	10.9733	11.2179	8.59157	9.19252
PBANKA_1142800	1142800	background/unknown	-0.271554	0.942451	FALSE	11.4562	10.2973	8.04998	8.53799	8.59029	8.17962	8.26247	6.7307
PBANKA_0823500	823500	background/unknown	-0.277475	1.58677	FALSE	11.1181	9.36662	9.62718	9.28629	8.38773	8.62567	6.93878	8.55264
PBANKA_1223100	PMSA6	background/unknown	-0.280595	1.80531	FALSE	13.6195	12.4631	11.9787	11.3604	11.017	10.8013	9.12067	9.74745
PBANKA_1403400	RPB11	expression	-0.286816	0.0953906	FALSE	12.6547	2.07226	2.43385	2.0631	3.68562	0.15286	9.66385	2.25569
PBANKA_0506100	506100	background/unknown	-0.289592	0.348676	FALSE	9.15463	8.98639	4.11984	5.15796	6.98303	6.51644	3.28267	5.65012
PBANKA_0938500	938500	background/unknown	-0.292162	0.120098	FALSE	2.11403	2.10649	9.40599	9.16867	0.312254	0.351722	9.19009	8.76224
PBANKA_0928100	PGM1	background/unknown	-0.292639	0.92177	FALSE	12.7823	12.4147	10.7475	10.4316	10.4132	9.97675	6.48209	10.9898
PBANKA_0610400	ATP4	background/unknown	-0.295479	1.18589	FALSE	9.88536	10.2891	8.38887	7.51541	8.11357	7.7055	6.44513	7.13283
PBANKA_0922500	922500	background/unknown	-0.296882	0.700673	FALSE	11.1558	12.0767	8.86895	7.93198	9.8224	9.41778	6.74897	6.5984
PBANKA_1441400	PCNA2	background/unknown	-0.29826	1.74788	FALSE	11.0252	10.1289	11.4266	11.4962	8.30963	8.2696	8.66449	10.6011
PBANKA_1410300	M1AAP	background/unknown	-0.308295	1.21772	FALSE	10.9531	11.039	9.82719	9.90718	9.02988	8.95161	6.05256	9.66403
PBANKA_1018500	BTF3	background/unknown	-0.309699	0.374495	FALSE	13.5156	13.3079	9.47587	9.4554	11.4176	11.7155	2.33546	11.4469
PBANKA_0208000	C-CAP	background/unknown	-0.315474	1.41188	FALSE	10.5014	8.66009	11.4406	10.7786	7.41501	7.51713	9.18536	9.13552
PBANKA_0715500	PGM2	background/unknown	-0.319409	0.140753	FALSE	11.5212	10.5187	2.16996	2.32625	8.90334	0.0408756	10.1309	2.19086
PBANKA_1418300	PRP2	background/unknown	-0.329455	0.216592	FALSE	8.44116	7.76609	2.21679	2.33933	5.78718	5.85342	2.06772	2.81593
PBANKA_1222800	TyrRS	background/unknown	-0.333365	1.40739	FALSE	11.427	11.7841	10.2637	9.56485	9.65196	8.8154	6.59795	9.09448
PBANKA_1357200	GRP170	background/unknown	-0.338762	0.162665	FALSE	2.49998	2.22234	9.3775	7.94115	0.246666	5.60586	2.16541	9.4103
PBANKA_0517000	ETRAMP10.2	background/unknown	-0.342498	0.477228	FALSE	9.39429	11.1982	8.18577	7.97545	8.57426	8.93407	9.28589	2.19247
PBANKA_0920000	MBF1	background/unknown	-0.345286	1.27102	FALSE	13.1941	12.8193	10.8148	10.7759	10.7835	10.8567	7.99416	7.83734
PBANKA_0405300	RPS23	ribosome	-0.346442	0.478409	FALSE	12.9295	13.7873	12.0845	12.9245	12.1784	12.6291	13.4507	2.42521
PBANKA_1360500	ECT	background/unknown	-0.363861	0.184948	FALSE	11.271	11.6826	2.34264	2.15818	9.38477	7.51099	2.19392	2.24467
PBANKA_1234500	1234500	background/unknown	-0.369933	0.251751	FALSE	11.9525	12.4046	2.42116	8.60376	0.300599	7.20861	9.39595	10.474
PBANKA_0505800	DPA	background/unknown	-0.377663	1.88142	FALSE	9.57887	10.1656	12.2273	11.7459	7.96308	8.22211	7.99784	9.46573
PBANKA_1315500	SORTLR	background/unknown	-0.37865	0.947326	FALSE	10.7029	8.23428	7.20023	7.52802	5.2311	5.35892	7.47772	7.82625
PBANKA_1458700	1458700	background/unknown	-0.392049	0.20494	FALSE	8.90202	6.63043	2.00637	2.1127	0.445666	6.32696	6.15786	2.04488
PBANKA_0902300	Fd2/PFG	background/unknown	-0.399575	0.214752	FALSE	2.03575	2.37494	2.05842	2.30068	0.229315	0.0319331	4.23547	2.15149
PBANKA_0804000	RPL37	ribosome	-0.423445	0.605269	FALSE	14.2421	14.2531	11.3729	10.7824	12.1638	12.3109	10.8064	2.48605
PBANKA_1022000	RPS25	ribosome	-0.425908	0.599804	FALSE	14.5868	14.6709	11.4232	13.1674	12.5392	12.1121	13.1875	2.24428
PBANKA_1418900	Rab11a	background/unknown	-0.426299	0.615446	FALSE	12.1994	10.5243	8.60452	9.46273	9.76578	10.1086	8.34504	2.13593
PBANKA_1223800	1223800	background/unknown	-0.426821	0.241182	FALSE	2.3834	2.10895	2.47427	7.46373	4.26592	0.427146	2.22786	3.8138
PBANKA_0603200	EIF5A	background/unknown	-0.433084	1.81389	FALSE	13.3865	13.0569	13.1321	13.5133	11.2921	11.7907	8.6971	7.54168
PBANKA_1200800	TRA2B	background/unknown	-0.438759	0.58704	FALSE	13.6966	12.7847	9.49294	9.77091	11.5278	11.1325	8.88766	2.20141
PBANKA_1341500	1341500	background/unknown	-0.452834	0.749364	FALSE	9.37144	9.52988	7.66233	7.47327	7.40233	7.61874	7.8232	2.02332
PBANKA_1018300	DNAI2	KT_spindle_MTOC	-0.457226	0.254647	FALSE	16.7063	16.4667	2.25657	7.20372	14.5761	0.0599247	7.80782	8.6096
PBANKA_1439400	ASF1	background/unknown	-0.458869	0.197046	FALSE	2.13135	2.38748	9.99785	8.78742	0.00270743	0.286207	7.22189	9.44425
PBANKA_0918100	RPL38	ribosome	-0.463875	0.646951	FALSE	15.3947	15.7703	12.5463	12.465	13.5046	13.3805	11.718	2.12672
PBANKA_0929800	929800	background/unknown	-0.465376	1.17292	FALSE	8.13513	7.69323	5.58597	7.0485	5.78635	4.73216	3.47336	6.62325
PBANKA_1356300	CDT1	DNA replication & repair	-0.466328	0.194921	FALSE	10.382	9.44138	2.05585	2.01706	0.0834035	0.267726	9.51175	7.43334
PBANKA_1306900	SRPK2	background/unknown	-0.469591	0.237262	FALSE	4.71377	2.39216	2.12912	2.4794	0.122246	0.415376	5.56171	2.36049
PBANKA_1201900	RPS20	ribosome	-0.470333	0.724817	FALSE	13.6419	13.5577	12.8596	12.3735	11.7722	11.8333	12.0944	2.1459
PBANKA_0205400	PMSB3	background/unknown	-0.477615	0.75422	FALSE	13.3624	12.6554	11.1565	11.3934	11.0265	10.6402	2.21609	10.9968
PBANKA_1241900	UBC13	background/unknown	-0.478793	0.170567	FALSE	2.4658	2.33794	2.24014	9.07199	0.414915	0.467458	2.00693	8.67508
PBANKA_1207200	AK1	background/unknown	-0.481561	1.13604	FALSE	12.1045	11.2122	11.4407	10.6411	9.69649	10.1825	3.85652	8.77898
PBANKA_1426700	PPPK-DHPS	background/unknown	-0.481912	1.1368	FALSE	9.25096	11.3919	6.91611	8.74258	8.33053	6.76013	6.20076	4.7015
PBANKA_0621400	621400	background/unknown	-0.482206	0.232898	FALSE	2.4682	6.07816	2.15488	2.00151	0.0683277	0.265738	4.71967	4.03994
PBANKA_1340000	1340000	background/unknown	-0.482554	0.260607	FALSE	8.41949	9.6731	2.02419	2.39967	7.18786	0.486369	5.95444	2.48658
PBANKA_0923200	ICAP2	background/unknown	-0.489747	0.248127	FALSE	8.82967	9.78462	2.27942	2.07127	7.45481	0.17858	6.62116	2.09996
PBANKA_0704500	HEUL	background/unknown	-0.497573	0.29369	FALSE	6.71291	9.76391	2.2553	2.11568	6.69609	4.00126	2.38195	1.68714
PBANKA_1355500	CK2beta2	background/unknown	-0.501782	0.339572	FALSE	11.6326	11.8606	2.35256	7.72629	9.71939	9.63857	2.26539	2.08642
PBANKA_0315200	315200	background/unknown	-0.508029	0.254387	FALSE	10.9242	10.4689	2.47356	2.21389	0.445729	7.54012	2.04509	8.3085
PBANKA_0926700	EXP1	background/unknown	-0.510717	0.355849	FALSE	10.8371	12.5003	9.99901	2.20674	9.98659	10.2864	2.35727	2.31656
PBANKA_0416100	DHC3	KT_spindle_MTOC	-0.519248	0.379875	FALSE	5.4103	5.93687	5.60282	6.49705	0.0700114	1.15807	7.58154	7.55021
PBANKA_1023000	UNC	background/unknown	-0.532236	0.596816	FALSE	4.53693	6.98059	6.45667	6.98642	5.61942	0.258627	6.64821	4.73356
PBANKA_0824800	PABP2	background/unknown	-0.54563	0.642992	FALSE	12.5689	12.3329	9.95073	10.5511	0.0485463	10.4479	10.0024	10.6069
PBANKA_0314600	314600	background/unknown	-0.556899	0.517139	FALSE	2.30336	7.76372	7.77327	7.85025	6.60942	6.3063	2.32812	2.21964
PBANKA_0809100	PA28	background/unknown	-0.588177	1.12207	FALSE	10.247	9.80045	10.8293	10.139	8.10391	8.05789	2.11074	9.01039
PBANKA_0404000	404000	background/unknown	-0.596987	0.455273	FALSE	6.81325	6.99451	2.09135	2.44431	4.93301	3.42662	1.49008	2.27774
PBANKA_0715700	715700	background/unknown	-0.598878	0.318103	FALSE	9.4431	10.4236	2.38219	2.33732	8.21432	0.451696	5.25985	2.30763
PBANKA_1421100	1421100	background/unknown	-0.633078	0.315939	FALSE	10.9171	11.3362	2.03134	2.41281	0.0677394	7.66429	2.32296	7.15954
PBANKA_1318100	APP	background/unknown	-0.634713	1.29739	FALSE	10.7429	9.54125	10.4187	9.56605	8.13581	8.60122	2.31455	6.88433
PBANKA_1329200	DHC6	background/unknown	-0.634942	0.408677	FALSE	2.49323	2.11217	2.38587	2.1364	0.0541569	0.0140815	3.57283	2.23685
PBANKA_0704100	UBE4B	background/unknown	-0.661475	0.706549	FALSE	9.2932	11.8719	6.0167	6.26098	9.21859	6.44582	3.40504	2.07414
PBANKA_1130400	PMSA4	background/unknown	-0.677439	0.861271	FALSE	13.0839	10.5844	11.8625	11.3126	0.0108611	8.13857	10.2255	10.915
PBANKA_0920800	920800	background/unknown	-0.691079	0.866318	FALSE	11.5508	9.32988	10.9523	11.2321	0.257097	6.28211	9.45769	10.6772
PBANKA_0204800	PSOP24	background/unknown	-0.742169	0.320719	FALSE	7.76705	2.2409	2.2889	2.08808	0.392833	0.283292	5.89485	2.02891
PBANKA_0904100	RAB6	background/unknown	-0.76083	0.886297	FALSE	12.995	12.4063	9.2715	10.0223	10.6796	10.9911	2.39492	2.31149
PBANKA_1336300	1336300	background/unknown	-0.78005	0.442134	FALSE	10.0214	8.93133	2.14131	2.31793	0.308968	5.65582	5.46442	2.20466
PBANKA_0802100	802100	background/unknown	-0.797463	0.336409	FALSE	2.05214	8.08755	2.32829	2.10195	0.0585514	0.407126	5.68299	2.2343
PBANKA_1428900	BDP2	background/unknown	-0.80287	0.471248	FALSE	8.51467	9.26906	2.10345	2.34928	0.2222	4.68461	5.57037	2.26892
PBANKA_1033200	DDI1	background/unknown	-0.85314	0.330345	FALSE	9.435	2.17165	2.10598	2.08682	0.0677644	0.459962	2.23616	5.98235
PBANKA_1120700	1120700	background/unknown	-0.859607	1.07138	FALSE	13.7284	13.3004	10.9313	10.8012	11.2197	11.0108	2.48852	2.15346
PBANKA_1101300	SBP1	background/unknown	-0.894267	0.777607	FALSE	7.0651	2.12054	7.00177	6.89186	5.27572	0.127839	2.32224	4.69133
PBANKA_1218900	EF-1delta	background/unknown	-0.899598	0.533909	FALSE	11.3245	11.9427	2.19965	10.6829	0.288435	0.154019	7.24788	11.6872
PBANKA_1222400	1222400	background/unknown	-0.899936	0.466728	FALSE	2.4917	9.40627	2.29789	8.73353	7.99902	0.162948	2.02488	2.10125
PBANKA_0934200	DSK2	background/unknown	-0.903081	0.566063	FALSE	2.28153	10.7128	10.9293	10.3122	0.193141	0.204355	8.47927	9.43062
PBANKA_0617900	AIF	background/unknown	-0.929352	1.40629	FALSE	9.67888	9.28235	7.93141	9.10091	0.0214127	6.34271	5.73417	6.80172
PBANKA_1035500	VPS29	background/unknown	-0.987353	0.621955	FALSE	2.39665	9.79769	8.44687	9.24227	0.0861957	10.3371	2.15819	2.49185
PBANKA_0813500	813500	background/unknown	-0.994587	0.54688	FALSE	2.32786	2.27952	9.65374	9.13224	6.81255	0.212227	2.49431	2.22156
PBANKA_1343300	PMSB7	background/unknown	-1.07808	1.49116	FALSE	10.7509	10.2018	7.5515	9.9918	0.223154	6.31822	3.75046	7.94218
PBANKA_0407100	SF3B1	background/unknown	-1.08695	0.73634	FALSE	8.76911	9.73839	5.28408	2.35454	7.54196	0.26081	2.40584	2.09986
PBANKA_0105500	GLP2	background/unknown	-1.09033	0.744138	FALSE	9.44968	2.38053	9.86584	10.0453	0.0975301	0.20687	7.31621	7.28683
PBANKA_1427500	ACBP	background/unknown	-1.09961	0.475709	FALSE	2.10034	2.05825	11.1238	11.5457	0.416675	0.422192	9.32647	2.35378
PBANKA_0803200	803200	background/unknown	-1.5728	0.771843	FALSE	2.18126	8.04995	2.22358	2.30944	0.112495	0.350518	2.40951	2.09054
PBANKA_1036200	RBM8A	background/unknown	-1.70109	2.17282	FALSE	10.4476	10.7178	9.16657	9.50846	0.0632733	7.81298	2.33501	2.04186
PBANKA_1010000	MAM33	background/unknown	-1.89854	0.674204	FALSE	2.08195	2.37472	2.13729	11.3042	0.214864	0.28299	2.22323	2.07946
PBANKA_1132600	1132600	background/unknown	-2.56823	1.71758	FALSE	10.1978	7.60247	2.15056	7.13836	0.0919457	0.254026	2.01947	2.20207

## Sheet: Supplementary Table 2, Tab 3
Protein Info										peptides				coverage				intensity				ibaq					ribaq				LFQ								MS counts
Protein IDs	Description	gene_name	category	comment	Mol. weight [kDa]	Sequence length	Q-value	Score	Number of proteins	WT_1	WT_2	ARK1_1	ARK1_2	WT_1	WT_2	ARK1_1	ARK1_2	WT_1	WT_2	ARK1_1	ARK1_2	WT_1	WT_2	ARK1_1	ARK1_2	enrichment	WT_1	WT_2	ARK1_1	ARK1_2	WT_1	WT_2	ARK1_1	ARK1_2					WT_1	WT_2	ARK1_1	ARK1_2
PBANKA_1343200	conserved Plasmodium protein, unknown function	INCENP2	CPC		269.33	2305	0	323.31	1	0	0	60	44	0	0	32.1	24.3	0	0	14874000	10341000	0	0	150470	91410	4.44519	2.36026	2.32085	9.70091	11.1075	0	0	1431700	1182200	1029.5	1049.5	1	5	0	0	67	52
PBANKA_1353900	inner centromere protein	INCENP1	CPC		135.04	1126	0	323.31	1	0	0	21	21	0	0	22.8	23	0	0	4711300	4191800	0	0	124720	64534	4.46906	2.0135	2.46963	9.43013	10.6052	0	0	1043200	919720	1029.5	1049.5	19.5	32.5	0	0	26	22
PBANKA_0104100	aurora-related kinase ARK1	ARK1	CPC	bait	40.909	353	0	323.31	1	0	0	13	15	0	0	37.1	43.3	0	0	22160000	19444000	0	0	632170	352650	5.48057	2.36142	2.16859	11.7717	13.0553	0	0	5121000	4492700	1029.5	1049.5	51.5	27.5	0	0	19	23
PBANKA_0804300	DNA mismatch repair protein MSH2	MSH2-2	DNA replication & repair		98.111	853	0	27.679	1	1	1	7	6	0	0	10.3	8.8	0	0	848320	536060	0	0	32003	18049	3.50922	2.20718	2.41914	7.46772	8.76707	0	0	277180	265280	1029.5	1049.5	258.5	350.5	0	0	8	6
PBANKA_1442200	protein SOC2	SOC2	DNA replication & repair		623.07	5372	0	19.067	1	1	0	5	3	0	0	1.2	0.7	0	0	158550	126200	0	0	1033.3	426.21	1.23744	2.31704	2.43286	2.51484	3.36285	0	0	64783	73484	1029.5	1049.5	416.5	625	0	0	5	3
PBANKA_0931100	conserved protein, unknown function	931100			24.779	219	0	33.991	1	1	1	5	4	0	0	21	22.4	0	0	700810	672000	0	0	98360	44415	4.31094	2.01872	2.42434	9.08758	10.0662	0	0	510270	441030	1029.5	1049.5	416.5	505	0	0	5	4
PBANKA_0803000	origin recognition complex subunit 2	ORC2	DNA replication & repair		91.7	781	0	10.034	1	1	1	4	2	0	0	8.5	4.6	0	0	373300	162570	0	0	8546.2	6767.4	2.94813	2.13323	2.24741	5.56286	7.35182	0	0	0	0	1029.5	1049.5	499	784	0	0	4	2
PBANKA_1336900	MCM10	MCM10-like	DNA replication & repair		60.126	508	0	16.723	1	0	0	3	4	0	0	8.3	10.8	0	0	109630	170910	0	0	9673.8	3780.3	2.72969	2.35423	2.13471	5.74166	6.51172	0	0	54932	58230	1029.5	1049.5	607	505	0	0	3	4
PBANKA_1420300	conserved Plasmodium protein, unknown function	1420300			24.408	208	0	11.115	1	0	0	2	1	0	0	10.1	0	0	0	390670	0	0	0	46701	0	1.79343	2.40935	2.20547	8.01296	0.263413	0	0	0	0	1029.5	1049.5	607	955	0	0	3	1
PBANKA_0604700	shewanella-like protein phosphatase 2	604700			35.357	302	0.0014461	2.9598	1	0	0	2	1	0	0	7.6	0	0	0	89555	0	0	0	6967.3	0	1.34108	2.02934	2.08838	5.26818	0.253988	0	0	0	0	1029.5	1049.5	607	955	0	0	3	1
PBANKA_0312500	origin recognition complex subunit 5	ORC5	DNA replication & repair		94.44	815	0	7.6518	1	0	0	3	0	0	0	4.3	0	0	0	104390	0	0	0	2676.6	0	0.975143	2.15794	2.33212	3.88798	0.490472	0	0	0	0	1029.5	1049.5	607	1090.5	0	0	3	0
PBANKA_0202500	P-loop containing nucleoside triphosphate hydrolase	RFC-like	DNA replication & repair		123.91	1043	0	14.907	1	0	0	2	1	0	0	2.8	0	0	0	86564	0	0	0	3672.1	0	0.893619	2.49084	2.40234	4.34419	0.0284523	0	0	0	0	1029.5	1049.5	607	955	0	0	3	1
PBANKA_1116300	malate:quinone oxidoreductase	MQO			59.225	520	0	9.9183	1	1	0	3	2	0	0	7.5	4.6	0	0	167910	182120	0	0	14957	6458.2	3.3679	2.00361	2.05076	6.37033	7.28435	0	0	83334	113250	1029.5	1049.5	607	784	0	0	3	2
PBANKA_1337600	BRCT domain-containing protein	1337600	DNA replication & repair		150	1265	0	20.986	1	1	0	3	3	0	0	3.1	3.1	0	0	178550	235420	0	0	7304.2	2879.9	2.46975	2.22225	2.4161	5.33631	6.11924	0	0	143960	130520	1029.5	1049.5	607	625	0	0	3	3
PBANKA_1336100	dihydroorotase	1336100			41.696	361	0	7.884	1	1	0	3	0	0	0	10.8	0	0	0	113710	0	0	0	6672.1	0	1.336	2.11052	2.15275	5.20572	0.490022	0	0	0	0	1029.5	1049.5	607	1090.5	0	0	3	0
PBANKA_0826700	parasitophorous vacuolar protein 5	PV5			25.252	222	0	18.176	1	1	1	3	3	0	0	14.4	14.4	0	0	336050	548140	0	0	112570	33605	4.4157	2.0068	2.28382	9.28226	9.66382	0	0	252440	431380	1029.5	1049.5	607	625	0	0	3	3
PBANKA_0911400	CLPTM1 domain-containing protein	911400			76.926	648	0	23.429	1	1	1	3	2	0	0	5.4	3.9	0	0	282140	201520	0	0	20969	9404.7	3.45336	2.07226	2.17994	6.85777	7.8266	0	0	144850	137510	1029.5	1049.5	607	784	0	0	3	2
PBANKA_1402500	condensin complex subunit 2	CAPH	chromatin architecture		108.95	943	0.00075245	3.5429	1	1	1	2	2	0	0	3.5	3.5	0	0	197610	171020	0	0	15842	5340.8	3.2552	2.08204	2.05397	6.45326	7.01027	0	0	120720	130620	1029.5	1049.5	607	784	0	0	3	2
PBANKA_0942500	thioredoxin-like mero protein	Trx-mero			49.066	420	0	49.907	1	1	1	3	4	0	0	9.3	11.2	0	0	249310	395030	0	0	11961	3269.7	2.5491	2.35116	2.49377	6.04785	6.30238	0	0	112950	146470	1029.5	1049.5	607	416.5	0	0	3	5
PBANKA_1028700	26S proteasome regulatory subunit RPN13	RPN13	expression		29.569	252	0	7.0823	1	1	1	2	1	0	0	10.7	0	0	0	721200	0	0	0	69395	0	1.86708	2.15061	2.47065	8.58434	0.0438954	0	0	318330	0	1029.5	1049.5	607	955	0	0	3	1
PBANKA_0303300	conserved Plasmodium protein, unknown function	CDC45	DNA replication & repair		74.425	619	0	8.6793	1	1	1	3	1	0	0	4.4	0	0	0	239110	0	0	0	10760	0	1.32162	2.4642	2.08298	5.89519	0.11446	0	0	0	0	1029.5	1049.5	607	955	0	0	3	1
PBANKA_1345400	ER lumen protein retaining receptor 1	1345400			32.775	284	0.0014684	3.1275	1	0	0	2	1	0	0	9.5	0	0	0	355140	0	0	0	47177	0	1.92061	2.26137	2.03697	8.02759	0.227813	0	0	0	0	1029.5	1049.5	763	955	0	0	2	1
PBANKA_1358800	kinetochore protein SPC25	SPC25	KT_spindle_MTOC		25.737	216	0.00082237	5.2723	1	0	0	2	0	0	0	10.6	0	0	0	127350	0	0	0	10613	0	1.21295	2.35349	2.49859	5.87534	0.0100037	0	0	0	0	1029.5	1049.5	763	1090.5	0	0	2	0
PBANKA_1223800	V-type proton ATPase subunit a	1223800			111.08	953	0	17.957	1	0	0	2	1	0	0	4.3	0	0	0	85539	0	0	0	3478.2	0	1.01131	2.41552	2.22542	4.26592	0.427522	0	0	0	0	1029.5	1049.5	763	955	0	0	2	1
PBANKA_0513900	ORC3 domain-containing protein	ORC3	DNA replication & repair		159.82	1346	0	8.1926	1	0	0	2	1	0	0	1.7	0	0	0	136080	0	0	0	3239.6	0	0.988293	2.17572	2.23247	4.1634	0.193185	0	0	0	0	1029.5	1049.5	763	955	0	0	2	1
PBANKA_1020100	serine/threonine protein phosphatase 7	PP7			111.57	954	0.0008	4.5339	1	0	0	2	0	0	0	2.5	0	0	0	124400	0	0	0	2303.8	0	0.906333	2.32165	2.05822	3.6716	0.298021	0	0	0	0	1029.5	1049.5	763	1090.5	0	0	2	0
PBANKA_0201800	TatD-like deoxyribonuclease	TatD			52.165	440	0.00076687	3.7562	1	0	0	2	0	0	0	5.5	0	0	0	61111	0	0	0	2546.3	0	0.925125	2.13309	2.35805	3.81598	0.338883	0	0	0	0	1029.5	1049.5	763	1090.5	0	0	2	0
PBANKA_1349100	MSP7-like protein	MSP7			37.705	335	0	72.772	1	0	1	2	2	0	0	11	11	0	0	132460	272220	0	0	22740	6971.5	3.30302	2.19742	2.15297	6.97474	7.39469	0	0	84680	175060	1029.5	1049.5	763	784	0	0	2	2
PBANKA_1320700	signal peptide peptidase	1320700			47.333	411	0	6.0939	1	0	1	2	2	0	0	5.4	5.4	0	0	88181	160530	0	0	24626	5407.4	3.09332	2.44853	2.11545	7.08969	7.02815	0	0	82286	79856	1029.5	1049.5	763	625	0	0	2	3
PBANKA_1239100	alpha- and gamma-adaptin-binding protein p34	1239100			47.127	397	0	7.5213	1	0	1	2	2	0	0	6	8.1	0	0	79999	104800	0	0	8452.5	3809.5	2.55964	2.27243	2.44299	5.54696	6.52282	0	0	0	0	1029.5	1049.5	763	625	0	0	2	3
PBANKA_0209300	actin-related protein ARP1	ARP1			42.438	379	0	11.881	1	0	1	2	2	0	0	10	10	0	0	99838	133820	0	0	9286	6239.8	2.96311	2.2051	2.1543	5.68264	7.23472	0	0	0	0	1029.5	1049.5	763	784	0	0	2	2
PBANKA_0808500	conserved Plasmodium protein, unknown function	808500			9.5229	79	0.0071336	1.6269	1	0	1	2	1	0	0	24.1	0	0	0	571050	0	0	0	224120	0	2.28453	2.45595	2.15173	10.2757	0.250703	0	0	0	0	1029.5	1049.5	763	955	0	0	2	1
PBANKA_1312000	condensin-2 complex subunit G2	CAPG2	chromatin architecture		141.52	1181	0.00081766	5.0486	1	0	1	2	2	0	0	2.1	1.7	0	0	72930	67576	0	0	2711.9	1088.5	1.95839	2.0824	2.32042	3.90688	4.71556	0	0	0	0	1029.5	1049.5	763	784	0	0	2	2
PBANKA_1358600	isocitrate dehydrogenase [NADP], mitochondrial	IDH			53.74	469	0.00078125	4.1115	1	0	1	2	1	0	0	5.5	0	0	0	183860	0	0	0	19612	0	1.6002	2.04675	2.39738	6.76124	0.350229	0	0	0	0	1029.5	1049.5	763	955	0	0	2	1
PBANKA_0810500	apoptosis-related protein	810500			15.536	131	0.00082372	5.3241	1	0	1	2	0	0	0	13.7	0	0	0	76472	0	0	0	16750	0	1.51184	2.2858	2.29926	6.53367	0.39822	0	0	0	0	1029.5	1049.5	763	1090.5	0	0	2	0
PBANKA_0920100	prefoldin subunit 5	920100			25.919	223	0	9.8728	1	0	1	2	0	0	0	11.2	0	0	0	176820	0	0	0	19682	0	1.54574	2.02414	2.43326	6.76639	0.123607	0	0	0	0	1029.5	1049.5	763	1090.5	0	0	2	0
PBANKA_1437200	conserved Plasmodium protein, unknown function	1437200			58.872	508	0.00078493	4.2113	1	0	1	2	0	0	0	4.7	0	0	0	252380	0	0	0	9459.8	0	1.27487	2.44956	2.3985	5.70939	0.471275	0	0	0	0	1029.5	1049.5	763	1090.5	0	0	2	0
PBANKA_1244600	phosphoenolpyruvate/phosphate translocator	1244600			58.904	518	0	7.683	1	0	1	2	1	0	0	6.2	0	0	0	131880	0	0	0	9569.1	0	1.38793	2.05634	2.16188	5.72596	0.128624	0	0	0	0	1029.5	1049.5	763	955	0	0	2	1
PBANKA_1423900	translation initiation factor SUI1	1423900			30.687	266	0	19.529	1	0	1	2	1	0	0	15	0	0	0	141760	0	0	0	6206.1	0	1.24551	2.08014	2.21176	5.10127	0.244358	0	0	0	0	1029.5	1049.5	763	955	0	0	2	1
PBANKA_1138700	conserved Plasmodium protein, unknown function	1138700			165.35	1417	0	6.3704	1	0	1	2	1	0	0	3	0	0	0	148730	0	0	0	2338.5	0	0.817534	2.38645	2.45967	3.69316	0.268704	0	0	0	0	1029.5	1049.5	763	955	0	0	2	1
PBANKA_1105500	mediator of RNA polymerase II transcription subunit 11	1105500			15.089	129	0	19.492	1	1	0	2	0	0	0	17.1	0	0	0	236290	0	0	0	53020	0	1.80908	2.37544	2.39059	8.19604	0.426063	0	0	0	0	1029.5	1049.5	763	1090.5	0	0	2	0
PBANKA_0819000	glideosome-associated protein 50	GAP50			44.306	395	0	6.1733	1	1	0	2	1	0	0	7.8	0	0	0	303600	0	0	0	33345	0	1.74744	2.44461	2.08138	7.52698	0.381915	0	0	0	0	1029.5	1049.5	763	955	0	0	2	1
PBANKA_1122800	ribonuclease H2 subunit A	1122800			33.284	288	0	8.222	1	1	0	2	1	0	0	9.7	0	0	0	217800	0	0	0	27759	0	1.66439	2.30309	2.19394	7.26246	0.222354	0	0	0	0	1029.5	1049.5	763	955	0	0	2	1
PBANKA_1427200	protein phosphatase PPM5	PPM5			58.717	514	0	24.296	1	1	0	2	1	0	0	4.7	0	0	0	58137	0	0	0	4107.1	0	1.09333	2.39941	2.12096	4.5057	0.436559	0	0	0	0	1029.5	1049.5	763	955	0	0	2	1
PBANKA_1210100	DNA repair protein RAD23	1210100			42.162	368	0	7.7703	1	1	1	2	2	0	0	7.3	5.4	0	0	135180	102010	0	0	23494	7510.2	3.22057	2.24757	2.26216	7.0218	7.50207	0	0	0	0	1029.5	1049.5	763	784	0	0	2	2
PBANKA_1103100	actin-depolymerizing factor 1	ADF1			13.964	122	0	102.66	1	1	1	2	2	0	0	19.7	19.7	0	0	150190	186100	0	0	15487	8192.5	3.00061	2.45594	2.22581	6.42057	7.62752	0	0	117500	131670	1029.5	1049.5	763	784	0	0	2	2
PBANKA_0517300	WD repeat-containing protein 70	517300			80.11	690	0	9.4848	1	1	1	2	2	0	0	4.1	4.9	0	0	127620	196860	0	0	14085	3449.2	2.62754	2.34667	2.47273	6.28367	6.37948	0	0	0	0	1029.5	1049.5	763	784	0	0	2	2
PBANKA_1408000	H/ACA ribonucleoprotein complex subunit 1	1408000			23.025	200	0	9.788	1	1	1	2	1	0	0	14.5	0	0	0	399640	0	0	0	170960	0	2.40479	2.01683	2.11815	9.8851	0.0586809	0	0	0	0	1029.5	1049.5	763	955	0	0	2	1
PBANKA_0621300	apicomplexan kinetochore protein 1	AKiT1	KT_spindle_MTOC		205.13	1737	0.00076805	3.7641	1	1	1	2	2	0	0	1.6	1.6	0	0	93452	95711	0	0	2432.6	994.17	1.72835	2.49045	2.33199	3.75008	4.58478	0	0	70773	72643	1029.5	1049.5	763	784	0	0	2	2
PBANKA_1239800	zinc finger protein	1239800			72.512	647	0	7.7496	1	1	1	2	1	0	0	6.5	0	0	0	200630	0	0	0	30640	0	1.58527	2.35861	2.45924	7.40492	0.232666	0	0	0	0	1029.5	1049.5	763	955	0	0	2	1
PBANKA_1429400	dynein light chain 1	DYNLL2a			10.774	93	0	16.242	1	1	1	2	1	0	0	24.7	0	0	0	75381	0	0	0	15566	0	1.45515	2.04003	2.46729	6.42791	0.130906	0	0	0	0	1029.5	1049.5	763	955	0	0	2	1
PBANKA_0409800	ATP synthase F0 subunit d-like protein	ICAP4			68.784	572	0	6.852	1	1	1	2	1	0	0	4.4	0	0	0	137270	0	0	0	9247.8	0	1.30539	2.47166	2.17129	5.67669	0.384168	0	0	0	0	1029.5	1049.5	763	955	0	0	2	1
PBANKA_1323200	AP-4 complex accessory subunit Tepsin	AP4T			97.463	842	0.00081235	4.9142	1	1	1	2	1	0	0	3.9	0	0	0	82128	0	0	0	4117.1	0	1.07244	2.0167	2.36268	4.50921	0.187404	0	0	0	0	1029.5	1049.5	763	955	0	0	2	1
PBANKA_0831800	elongation factor Tu	831800			93.476	796	0	9.1597	1	0	0	1	2	0	0	0	4.1	0	0	0	58120	0	0	0	821.81	1.04722	2.04844	2.09033	0.0240888	4.3101	0	0	0	0	1029.5	1049.5	1001	784	0	0	0	2
PBANKA_0813400	alkaline phosphatase	813400			53.181	453	0.0007837	4.2082	1	0	0	0	2	0	0	0	5.3	0	0	0	58581	0	0	0	0	0.135868	2.46694	2.2308	0.238632	0.39964	0	0	0	0	1029.5	1049.5	1001	784	0	0	0	2
PBANKA_1427500	acyl-CoA binding protein	ACBP			10.3	88	0	18.406	1	0	0	0	3	0	0	0	45.5	0	0	0	198700	0	0	0	0	0.0782529	2.29805	2.12586	0.273204	0.0729803	0	0	0	0	1029.5	1049.5	1001	625	0	0	0	3
PBANKA_0923600	GrpE protein homolog, mitochondrial	MGE1			32.886	285	0	7.5145	1	0	1	1	2	0	0	0	10.9	0	0	0	166250	0	0	0	5421.6	1.69508	2.0239	2.35779	0.395389	7.03194	0	0	0	0	1029.5	1049.5	1001	784	0	0	0	2
PBANKA_0410400	glycogen synthase kinase-3 beta	GSK3			49.737	430	0	13.555	1	0	1	1	3	0	0	0	10.7	0	0	0	189380	0	0	0	2686.1	1.26538	2.49355	2.29785	0.0441903	6.01873	0	0	0	0	1029.5	1049.5	1001	625	0	0	0	3
PBANKA_1441900	DNA helicase 60	1441900			83.708	715	0.00080257	4.5992	1	0	1	1	2	0	0	0	3.1	0	0	0	153950	0	0	0	2254.8	1.36025	2.34935	2.20117	0.423619	5.76622	0	0	0	0	1029.5	1049.5	1001	625	0	0	0	3
PBANKA_1234600	EELM2 domain-containing protein	1234600			93.379	792	0	12.977	1	0	1	1	2	0	0	0	3	0	0	0	95234	0	0	0	1337.6	1.11905	2.25559	2.29277	0.0769639	5.01287	0	0	0	0	1029.5	1049.5	1001	784	0	0	0	2
PBANKA_1430800	thioredoxin peroxidase 2	Trx-Px2			24.727	215	0	6.2626	1	0	1	1	2	0	0	0	15.3	0	0	0	107520	0	0	0	934.29	1.05744	2.45494	2.16565	0.390844	4.49516	0	0	0	0	1029.5	1049.5	1001	784	0	0	0	2
PBANKA_1226800	DNA repair and recombination protein RAD54	RAD54	DNA replication & repair		121.59	1048	0	7.3241	1	0	1	1	3	0	0	0	3.6	0	0	0	121280	0	0	0	714.22	0.929596	2.42225	2.28025	0.263768	4.10766	0	0	0	0	1029.5	1049.5	1001	625	0	0	0	3
PBANKA_1358300	conserved Plasmodium protein, unknown function	MSH2	DNA replication & repair		167.03	1419	0	16.907	1	0	1	1	2	0	0	0	2.1	0	0	0	110440	0	0	0	195.02	0.534893	2.34935	2.31342	0.259177	2.23491	0	0	0	0	1029.5	1049.5	1001	784	0	0	0	2
PBANKA_0618400	tetratricopeptide repeat protein	618400			23.746	198	0.0014749	3.2045	1	0	1	0	2	0	0	0	14.6	0	0	0	68713	0	0	0	0	0.148184	2.25759	2.29831	0.25188	0.423233	0	0	0	0	1029.5	1049.5	1001	784	0	0	0	2
PBANKA_1355700	myosin A	MyoA			92.342	817	0	5.6322	1	1	0	1	3	0	0	0	6.1	0	0	0	236590	0	0	0	2502.1	1.42641	2.01872	2.38256	0.361663	5.91636	0	0	0	0	1029.5	1049.5	1001	625	0	0	0	3
PBANKA_1438000	cAMP-dependent protein kinase regulatory subunit	PKAr			49.671	436	0	12.636	1	1	0	1	2	0	0	0	5.7	0	0	0	132630	0	0	0	1936.2	1.41555	2.18023	2.00046	0.371542	5.54645	0	0	0	0	1029.5	1049.5	1001	784	0	0	0	2
PBANKA_1448900	DNA polymerase epsilon subunit B	POLE-B	DNA replication & repair		73.233	623	0	17.788	1	1	0	1	2	0	0	0	3.7	0	0	0	83069	0	0	0	2556.5	1.29389	2.25673	2.39085	0.0660552	5.94739	0	0	0	0	1029.5	1049.5	1001	784	0	0	0	2
PBANKA_0836300	cytoadherence linked asexual protein 9	836300			161.62	1349	0.0047912	2.2574	1	1	0	1	2	0	0	0	2	0	0	0	38249	0	0	0	122.86	0.385959	2.1171	2.10515	0.0613118	1.56831	0	0	0	0	1029.5	1049.5	1001	784	0	0	0	2
PBANKA_0828600	cytochrome c oxidase subunit 5B	828600			32.207	274	0.0008071	4.7713	1	1	0	0	2	0	0	0	15.7	0	0	0	104610	0	0	0	0	0.127317	2.08747	2.30701	0.202385	0.357106	0	0	0	0	1029.5	1049.5	1001	784	0	0	0	2
PBANKA_0807400	26S proteasome non-ATPase regulatory subunit 9	807400			26.007	224	0	6.7431	1	1	0	0	2	0	0	0	10.3	0	0	0	128920	0	0	0	0	0.0365448	2.38555	2.05675	0.0103034	0.152039	0	0	0	0	1029.5	1049.5	1001	625	0	0	0	3
PBANKA_0937700	60S ribosomal protein L36	RPL36	ribosome		12.726	113	0.0014717	3.175	1	1	1	1	2	0	0	0	15.9	0	0	0	533770	0	0	0	127400	2.86004	2.01907	2.19482	0.465433	11.5864	0	0	0	0	1029.5	1049.5	1001	784	0	0	0	2
PBANKA_1023900	glutathione S-transferase	GST			24.038	205	0	21.487	1	1	1	1	2	0	0	0	13.7	0	0	0	152540	0	0	0	7255.2	1.68901	2.22786	2.45502	0.457192	7.45223	0	0	0	0	1029.5	1049.5	1001	784	0	0	0	2
PBANKA_0924100	thioredoxin-like protein	924100			43.107	367	0	15.665	1	1	1	1	4	0	0	0	17.7	0	0	0	497680	0	0	0	5963.7	1.64194	2.38364	2.07506	0.15148	7.16943	0	0	0	0	1029.5	1049.5	1001	505	0	0	0	4
PBANKA_0506300	methyltransferase	506300			29.99	255	0	10.055	1	1	1	1	2	0	0	0	11.8	0	0	0	77378	0	0	0	2918.8	1.3862	2.39353	2.19855	0.226938	6.13859	0	0	0	0	1029.5	1049.5	1001	784	0	0	0	2
PBANKA_1129400	deubiquitinating enzyme MINDY	1129400			95.205	807	0	5.7507	1	1	1	1	2	0	0	0	4.1	0	0	0	180320	0	0	0	1778.4	1.24621	2.34852	2.36472	0.449891	5.4238	0	0	0	0	1029.5	1049.5	1001	784	0	0	0	2
PBANKA_1243900	apicomplexan kinetochore protein 5	AKiT5	KT_spindle_MTOC		176.43	1522	0	6.9948	1	1	1	1	2	0	0	0	1.4	0	0	0	69304	0	0	0	1509.6	1.10746	2.40376	2.29212	0.0131037	5.18738	0	0	0	0	1029.5	1049.5	1001	784	0	0	0	2
PBANKA_0621600	conserved Plasmodium protein, unknown function	621600			81.229	696	0	9.4506	1	1	1	1	2	0	0	0	4.2	0	0	0	99727	0	0	0	1476.5	1.20684	2.47874	2.08138	0.347941	5.1554	0	0	0	0	1029.5	1049.5	1001	784	0	0	0	2
PBANKA_1031600	ribosome maturation protein SBDS	1031600			71.485	617	0	5.7965	1	1	1	1	2	0	0	0	4.1	0	0	0	237510	0	0	0	734.68	1.01064	2.47862	2.11325	0.492299	4.14841	0	0	0	0	1029.5	1049.5	1001	784	0	0	0	2
PBANKA_1426500	cullin-1	CUL1			100.88	844	0	6.6882	1	1	1	1	2	0	0	0	4	0	0	0	97589	0	0	0	649	0.930819	2.34728	2.00819	0.084638	3.96951	0	0	0	0	1029.5	1049.5	1001	784	0	0	0	2
PBANKA_1358900	dynactin subunit 2	1358900			85.235	728	0	16.855	1	1	1	1	4	0	0	0	8.9	0	0	0	189140	0	0	0	463.91	0.908793	2.11247	2.27111	0.498637	3.48514	0	0	0	0	1029.5	1049.5	1001	505	0	0	0	4
PBANKA_1356800	VPS13 domain-containing protein	1356800			840.67	7126	0.004158	2.3762	1	1	1	0	2	0	0	0	0.4	0	0	0	1216600	0	0	0	0	0.147678	2.44776	2.26885	0.463913	0.232628	0	0	0	0	1029.5	1049.5	1001	784	0	0	0	2
PBANKA_1003400	amino acid decarboxylase AAD	UIS14			261.21	2262	0	26.391	1	1	1	0	2	0	0	0	1.1	0	0	0	107400	0	0	0	0	0.120538	2.49381	2.4013	0.28252	0.307529	0	0	0	0	1029.5	1049.5	1001	784	0	0	0	2
PBANKA_1010000	mitochondrial acidic protein MAM33	MAM33			28.907	252	0	5.8013	1	1	1	0	2	0	0	0	9.9	0	0	0	92557	0	0	0	0	0.0506157	2.42106	2.39208	0.144453	0.0991677	0	0	0	0	1029.5	1049.5	1001	784	0	0	0	2
PBANKA_1321700	berghepain-1	BP1			60.311	519	0	39.488	1	1	2	4	4	0	5.2	9.6	9.6	0	296260	962410	546280	0	1503.4	76710	40100	2.0066	2.3634	6.92977	8.72892	9.91875	0	248310	307650	311190	1029.5	846	416.5	505	0	2	5	4
PBANKA_1102900	cell division control protein 6	CDC6	DNA replication & repair		101.56	869	0	27.748	1	1	2	3	2	0	2.9	4.5	3	0	172370	421100	269650	0	1415	18677	8422.1	1.61999	2.02079	6.84234	6.69077	7.6674	0	0	162130	179280	1029.5	846	499	784	0	2	4	2
PBANKA_0717500	nuclear cap-binding protein subunit 2	CBP20			28.543	239	0	15.592	1	1	2	3	3	0	11.7	17.2	17.2	0	584180	512590	449150	0	35485	139790	32171	1.38567	2.36229	11.4907	9.5947	9.60091	0	436090	260070	253640	1029.5	846	499	625	0	2	4	3
PBANKA_0809000	translation initiation factor SUI1	809000			94.773	817	0	22.28	1	1	2	4	3	0	4.9	8	6.5	0	324070	342520	272890	0	2893	16935	5579	1.33908	2.2991	7.87411	6.54952	7.07323	0	198060	170760	175740	1029.5	846	499	625	0	2	4	3
PBANKA_0714200	chaperone protein ClpB1	ClpB1			119	1044	0	24.183	1	0	2	3	4	0	2.8	3.7	5.6	0	73258	203050	306980	0	0	9844.7	3275.3	2.5641	2.47226	2.23573	5.76693	6.30485	0	0	129640	170660	1029.5	846	607	505	0	2	3	4
PBANKA_0813500	SAP domain-containing protein	813500			28.217	247	0	10.994	1	0	2	3	1	0	10.9	15.4	0	0	127960	127480	0	0	0	20322	0	1.39549	2.43815	2.49148	6.81255	0.0666929	0	69632	99623	0	1029.5	846	607	955	0	2	3	1
PBANKA_1456900	translation initiation factor SUI1	1456900			12.839	115	0	26.62	1	1	2	3	3	0	30.4	39.1	38.3	0	37515	185960	158120	0	3777.6	61146	32843	1.68634	2.43426	8.25901	8.40177	9.63073	0	79307	127580	89068	1029.5	846	607	625	0	2	3	3
PBANKA_0517200	haloacid dehalogenase-like hydrolase	HAD1			33.548	296	0	12.19	1	1	2	3	2	0	9.1	10.5	6.8	0	192740	381210	332250	0	6297.8	60072	23826	1.53847	2.40707	8.99639	8.3762	9.16768	0	0	318650	297630	1029.5	846	607	784	0	2	3	2
PBANKA_1409600	meiosis-specific nuclear structural protein 1	MNS1			59.504	484	0	24.674	1	1	2	3	2	0	4.3	6.2	6	0	115790	226420	178590	0	1801.9	17432	9057	1.54099	2.12988	7.19106	6.59125	7.77225	0	76492	111000	0	1029.5	846	607	784	0	2	3	2
PBANKA_0834300	gamma-tubulin complex component	GCP3B			146.24	1242	0	32.721	1	1	2	3	4	0	2.5	3.6	4.4	0	157570	130180	187050	0	1022.3	8441	2034	1.30966	2.14988	6.37336	5.54499	5.61754	0	78905	83436	80842	1029.5	846	607	505	0	2	3	4
PBANKA_0505700	ATP-dependent RNA helicase ROK1	505700			71.006	609	0	13.514	1	1	2	3	0	0	4.8	5.4	0	0	88943	74081	0	0	783.67	4335.4	0	0.561747	2.28205	5.98986	4.58375	0.0629792	0	0	0	0	1029.5	846	607	1090.5	0	2	3	0
PBANKA_0205000	ELM2 domain-containing protein	205000			19.903	172	0	16.422	1	0	2	2	2	0	17.4	17.4	17.4	0	629140	598450	517410	0	0	436250	149610	5.28973	2.03825	2.32017	11.2366	11.8183	0	316310	377820	315380	1029.5	846	763	784	0	2	2	2
PBANKA_0207200	V-type proton ATPase subunit C	207200			45.272	383	0	14.807	1	0	2	2	2	0	8.4	7.6	8.4	0	148750	92570	94862	0	0	12049	3702.8	2.90761	2.07055	2.24236	6.05842	6.48184	0	0	0	0	1029.5	846	763	784	0	2	2	2
PBANKA_0513200	WD repeat-containing protein	513200			66.234	565	0	18.955	1	0	2	2	1	0	5.3	5.3	0	0	165200	99385	0	0	0	14330	0	1.58572	2.12701	2.06303	6.30855	0.335683	0	91922	72496	0	1029.5	846	763	955	0	2	2	1
PBANKA_0601700	AATF domain-containing protein	601700			49.796	423	0	8.1259	1	0	2	2	0	0	5	5	0	0	75792	106350	0	0	0	6741.5	0	1.23354	2.28618	2.31856	5.22065	0.45949	0	64904	85496	0	1029.5	846	763	1090.5	0	2	2	0
PBANKA_0804600	ATPase family AAA domain-containing protein 3A	804600			75.832	649	0	8.8711	1	0	2	2	1	0	4.5	3.9	0	0	110910	52487	0	0	0	4393.9	0	1.07992	2.22243	2.07296	4.60308	0.0355703	0	0	0	0	1029.5	846	763	955	0	2	2	1
PBANKA_0501700	phosphomannomutase	501700			28.311	245	0	26.262	1	1	2	2	3	0	10.6	10.6	15.9	0	133180	210020	187990	0	2733.8	38146	14001	1.64374	2.01552	7.79245	7.72104	8.40068	0	95570	182480	0	1029.5	846	763	625	0	2	2	3
PBANKA_1338400	V-type proton ATPase subunit G	1338400			14.05	121	0	29.621	1	1	2	2	3	0	17.4	17.4	26.4	0	567210	496690	546800	0	58258	326710	82782	1.51871	2.13773	12.2059	10.8194	10.9645	0	330030	365670	370060	1029.5	846	763	625	0	2	2	3
PBANKA_0806200	E3 ubiquitin-protein ligase RBX1	RBX1			12.527	107	0	8.6602	1	1	2	2	2	0	25.2	25.2	25.2	0	600680	390840	466120	0	67454	358980	78168	1.46955	2.44234	12.4174	10.9553	10.8817	0	344460	277740	325880	1029.5	846	763	784	0	2	2	2
PBANKA_0202300	UMP-CMP kinase	202300			42.985	361	0.00076453	3.7251	1	1	2	2	2	0	6.6	6.6	6.6	0	61533	94779	112790	0	1466.1	14921	4739	1.47547	2.05591	6.89353	6.36685	6.8378	0	33710	65649	79261	1029.5	846	763	784	0	2	2	2
PBANKA_1215500	translation machinery-associated protein 7	1215500			6.0773	54	0	28.466	1	1	2	2	2	0	27.8	27.8	27.8	0	81786	202670	142230	0	24470	70467	70467	1.48044	2.10826	10.9545	8.60646	10.7321	0	43277	0	90972	1029.5	846	763	784	0	2	2	2
PBANKA_0110200	lsm12	LSM12			20.9	178	0	12.297	1	1	2	2	2	0	16.9	16.9	16.9	0	266790	178510	248730	0	19052	72074	13048	1.29533	2.48273	10.5934	8.63899	8.29898	0	206260	194310	234150	1029.5	846	763	784	0	2	2	2
PBANKA_0518200	flavoprotein subunit of succinate dehydrogenase	SDHA			70.446	631	0	23.436	1	1	2	2	2	0	5.7	5.7	5.7	0	62929	54164	54360	0	562.07	5604.8	1593.1	1.30358	2.32906	5.51036	4.95424	5.26506	0	31872	34438	33516	1029.5	846	763	784	0	2	2	2
PBANKA_0314600	thioesterase/thiol ester dehydrase-isomerase	314600			59.597	504	0	23.043	1	1	2	2	2	0	6.9	6.9	6.9	0	142450	91800	185000	0	2679.9	17653	3278.6	1.2787	2.33695	7.76372	6.60942	6.3063	0	92786	58462	143580	1029.5	846	763	784	0	2	2	2
PBANKA_0904500	SUMO-activating enzyme subunit 1	AOS1			42.778	365	0	7.3743	1	1	2	2	2	0	8.5	6.3	8.5	0	183570	67423	165320	0	1556.6	12547	942.26	1.15721	2.20096	6.97994	6.11685	4.50742	0	101270	0	110130	1029.5	846	763	784	0	2	2	2
PBANKA_1222400	ubiquitin regulatory protein	1222400			27.641	239	0	55.775	1	1	2	2	1	0	12.6	12.6	0	0	162470	158320	0	0	8367.1	46252	0	0.733289	2.06256	9.40627	7.99902	0.410935	0	83738	102870	0	1029.5	846	763	955	0	2	2	1
PBANKA_0800600	centrin	CEN			12.463	107	0	20.729	1	1	2	2	1	0	23.4	28	0	0	53251	85079	0	0	17024	67041	0	0.707422	2.33609	10.431	8.53455	0.497197	0	0	0	0	1029.5	846	763	955	0	2	2	1
PBANKA_1437400	diphthine--ammonia ligase	DPH6			28.566	247	0	5.9977	1	1	2	2	1	0	8.9	8.9	0	0	173660	99160	0	0	6702.7	32265	0	0.668374	2.27565	9.08628	7.47948	0.114537	0	105310	80043	0	1029.5	846	763	955	0	2	2	1
PBANKA_1404700	conserved protein, unknown function	1404700			59.442	506	0	9.6405	1	1	2	2	1	0	6.1	6.1	0	0	117260	63752	0	0	5075.7	19226	0	0.62856	2.26653	8.68515	6.73257	0.151226	0	71954	71549	0	1029.5	846	763	955	0	2	2	1
PBANKA_1309000	ATP-dependent RNA helicase MAK5	1309000			87.928	752	0	21.224	1	1	2	2	0	0	2.9	2.9	0	0	134330	71812	0	0	1986.2	7271.9	0	0.578673	2.18787	7.33155	5.32991	0.178719	0	68040	45450	0	1029.5	846	763	1090.5	0	2	2	0
PBANKA_1122500	splicing factor-like protein 1	1122500			69.595	610	0	18.239	1	1	2	2	1	0	5.7	5.6	0	0	147160	91984	0	0	3807.4	621.04	0	0.201175	2.33197	8.27035	1.78034	0.352586	0	0	0	0	1029.5	846	763	955	0	2	2	1
PBANKA_1461100	pre-mRNA-splicing factor RBM22	1461100			44.64	385	0	24.976	1	0	2	1	2	0	8.6	0	8.6	0	133200	0	109770	0	0	0	7497	1.83164	2.13027	2.12799	0.30006	7.49953	0	103180	0	97734	1029.5	846	1001	784	0	2	0	2
PBANKA_0520400	dynamin-like protein	520400			85.807	749	0	6.5708	1	0	2	1	3	0	4.9	0	6.9	0	175640	0	339270	0	0	0	3539.6	1.54223	2.00457	2.43878	0.435849	6.4168	0	132620	0	187530	1029.5	846	1001	625	0	2	0	3
PBANKA_1357200	endoplasmic reticulum chaperone GRP170	GRP170			106.16	917	0	26.88	1	0	2	1	3	0	2.8	0	4.3	0	119010	0	468620	0	0	0	2017.6	1.24352	2.08913	2.46985	0.0633253	5.60586	0	75743	0	220190	1029.5	846	1001	505	0	2	0	4
PBANKA_0933900	glyoxalase I	GLO1			41.824	353	0	9.3265	1	0	2	1	2	0	7.9	0	13.6	0	157780	0	127260	0	0	0	1428.4	1.31751	2.10779	2.1046	0.442227	5.10762	0	0	0	0	1029.5	846	1001	784	0	2	0	2
PBANKA_0915300	conserved Plasmodium protein, unknown function	915300			123.13	1030	0	27.563	1	0	2	1	2	0	2.5	0	2.5	0	109530	0	70904	0	0	0	784.82	0.93613	2.49853	2.25458	0.205878	4.24365	0	68948	0	54418	1029.5	846	1001	784	0	2	0	2
PBANKA_1445600	serine/threonine protein kinase RIO1	1445600			94.414	796	0	13.248	1	0	2	0	1	0	3	0	0	0	176690	0	0	0	0	0	0	0.202071	2.10425	2.14214	0.428206	0.429868	0	0	0	0	1029.5	846	1001	955	0	2	0	1
PBANKA_1439400	histone chaperone ASF1	ASF1			31.315	268	0.00079302	4.4316	1	0	2	1	1	0	8.6	0	0	0	54586	0	0	0	0	0	0	0.160964	2.41105	2.23894	0.46706	0.281419	0	0	0	0	1029.5	846	1001	955	0	2	0	1
PBANKA_1125900	ankyrin-repeat protein	1125900			203.36	1778	0.00081699	5.0122	1	0	2	0	0	0	2.1	0	0	0	61452	0	0	0	0	0	0	0.152507	2.11997	2.33277	0.285452	0.393622	0	0	0	0	1029.5	846	1001	1090.5	0	2	0	0
PBANKA_1445800	ras-related protein Rab-2	1445800			24.429	213	0	6.9243	1	0	2	0	2	0	15.5	0	15.5	0	183200	0	187230	0	0	0	0	0.12461	2.06189	2.49504	0.283557	0.284282	0	182290	0	134550	1029.5	846	1001	784	0	2	0	2
PBANKA_1406200	TOM1-like protein	1406200			138.72	1200	0	8.257	1	0	2	1	0	0	2.5	0	0	0	86508	0	0	0	0	0	0	0.114107	2.41754	2.45945	0.157726	0.398775	0	0	0	0	1029.5	846	1001	1090.5	0	2	0	0
PBANKA_0702400	conserved protein, unknown function	702400			62.148	541	0.0014245	2.8535	1	0	2	0	0	0	4.1	0	0	0	56930	0	0	0	0	0	0	0.115103	2.37922	2.48819	0.209575	0.350679	0	0	0	0	1029.5	846	1001	1090.5	0	2	0	0
PBANKA_0404300	P-loop containing nucleoside triphosphate hydrolase	404300			106.31	904	0	6.1163	1	0	2	0	0	0	2.9	0	0	0	149800	0	0	0	0	0	0	0.122883	2.20525	2.18667	0.224338	0.315354	0	0	0	0	1029.5	846	1001	1090.5	0	2	0	0
PBANKA_0823300	para-aminobenzoic acid synthetase	823300			112.14	955	0.0041638	2.395	1	0	2	0	0	0	2.6	0	0	0	54540	0	0	0	0	0	0	0.11391	2.40515	2.32188	0.444536	0.0939191	0	0	0	0	1029.5	846	1001	1090.5	0	2	0	0
PBANKA_1419200	RNA-binding protein	1419200			14.981	128	0.002811	2.5745	1	0	2	0	0	0	26.6	0	0	0	176260	0	0	0	0	0	0	0.110746	2.45378	2.15562	0.0465627	0.463908	0	0	0	0	1029.5	846	1001	1090.5	0	2	0	0
PBANKA_0822900	dynein intermediate chain	DNAI1b			93.53	797	0.0028309	2.7534	1	0	2	0	0	0	3.4	0	0	0	79606	0	0	0	0	0	0	0.11715	2.47115	2.33253	0.185399	0.377355	0	0	0	0	1029.5	846	1001	1090.5	0	2	0	0
PBANKA_1440400	small subunit rRNA processing factor	1440400			50.301	426	0.00082034	5.2163	1	0	2	0	1	0	5.2	0	0	0	166120	0	0	0	0	0	0	0.116806	2.41832	2.0453	0.404968	0.11641	0	0	0	0	1029.5	846	1001	955	0	2	0	1
PBANKA_1104800	actin-like protein	ALP2b			64.701	556	0.00080972	4.8039	1	0	2	0	0	0	4.7	0	0	0	213190	0	0	0	0	0	0	0.134437	2.009	2.01659	0.452196	0.0889913	0	0	0	0	1029.5	846	1001	1090.5	0	2	0	0
PBANKA_0618200	phosphoinositide-binding protein PX1	618200			228.49	1916	0.000819	5.1446	1	0	2	0	0	0	1.5	0	0	0	73207	0	0	0	0	0	0	0.107203	2.2933	2.41795	0.0178034	0.487257	0	0	0	0	1029.5	846	1001	1090.5	0	2	0	0
PBANKA_0511500	DNA-directed RNA polymerase II subunit RPB7	511500			20.308	177	0.003499	2.5112	1	0	2	0	0	0	11.9	0	0	0	42009	0	0	0	0	0	0	0.108346	2.24023	2.36294	0.466262	0.0324726	0	0	0	0	1029.5	846	1001	1090.5	0	2	0	0
PBANKA_0718400	histone acetyltransferase	718400			116.07	985	0	16.375	1	0	2	0	2	0	2.8	0	2.5	0	157580	0	114370	0	0	0	0	0.101387	2.39697	2.39721	0.468804	0.0172652	0	0	0	0	1029.5	846	1001	784	0	2	0	2
PBANKA_1361500	WD repeat-containing protein 16	CFAP52	KT_spindle_MTOC		85.053	723	0.0041322	2.3053	1	0	2	0	0	0	3.3	0	0	0	119620	0	0	0	0	0	0	0.114241	2.18289	2.01399	0.290915	0.188542	0	0	0	0	1029.5	846	1001	1090.5	0	2	0	0
PBANKA_1014400	acid phosphatase	1014400			243.23	2092	0.00078003	4.0952	1	0	2	0	0	0	1.1	0	0	0	96556	0	0	0	0	0	0	0.103004	2.16913	2.34491	0.296483	0.16848	0	0	0	0	1029.5	846	1001	1090.5	0	2	0	0
PBANKA_0621700	type 2A phosphatase-associated protein 42	621700			50.681	422	0	10.059	1	0	2	1	1	0	6.4	0	0	0	175580	0	0	0	0	0	0	0.0841577	2.43702	2.45496	0.182772	0.228925	0	0	0	0	1029.5	846	1001	955	0	2	0	1
PBANKA_0703700	ATP-dependent RNA helicase DBP10	703700			126.11	1071	0.00079365	4.4451	1	0	2	0	0	0	3.8	0	0	0	75384	0	0	0	0	0	0	0.0818408	2.10106	2.32656	0.139181	0.223179	0	0	0	0	1029.5	846	1001	1090.5	0	2	0	0
PBANKA_0805400	DNA-directed RNA polymerases I, II, and III subunit RPABC5	805400			8.1837	69	0.00074405	3.3367	1	0	2	0	0	0	31.9	0	0	0	160460	0	0	0	0	0	0	0.0780678	2.05332	2.10544	0.0431224	0.281543	0	0	0	0	1029.5	846	1001	1090.5	0	2	0	0
PBANKA_0938500	succinate--CoA ligase [ADP-forming] subunit alpha	938500			35.528	329	0	6.4117	1	0	2	1	1	0	8.8	0	0	0	86536	0	0	0	0	0	0	0.061225	2.42807	2.2421	0.128722	0.157209	0	0	0	0	1029.5	846	1001	955	0	2	0	1
PBANKA_0902300	female development protein FD2	Fd2/PFG			316.56	2709	0.0035014	2.5136	1	0	2	0	1	0	1	0	0	0	95735	0	0	0	0	0	0	0.0641062	2.33328	2.1986	0.192641	0.0978805	0	0	0	0	1029.5	846	1001	955	0	2	0	1
PBANKA_0916400	ubiquitin-like protein	916400			87.968	775	0	5.8051	1	0	2	0	1	0	3.2	0	0	0	78361	0	0	0	0	0	0	0.0565525	2.39452	2.04567	0.15329	0.097814	0	0	0	0	1029.5	846	1001	955	0	2	0	1
PBANKA_1216100	regulator of initiation factor 2	1216100			89.213	754	0	6.1348	1	0	2	1	0	0	4.2	0	0	0	86072	0	0	0	0	0	0	0.00984358	2.01829	2.23292	0.026192	0.0156551	0	0	0	0	1029.5	846	1001	1090.5	0	2	0	0
PBANKA_1039900	DHH phosphoesterase	1039900			59.532	501	0	28.701	1	1	2	1	2	0	5.6	0	5.8	0	104520	0	114460	0	1109.9	0	3277	0.7846	2.1108	6.49197	0.444144	6.30559	0	0	0	0	1029.5	846	1001	784	0	2	0	2
PBANKA_0311800	acyl-CoA synthetase	ACS9			86.205	753	0	11.817	1	1	2	1	2	0	4.4	0	3.9	0	130420	0	195090	0	1126.7	0	2186.3	0.689247	2.29175	6.51365	0.34738	5.72171	0	0	0	0	1029.5	846	1001	784	0	2	0	2
PBANKA_1204300	CCR4-NOT transcription complex subunit 5	1204300			22.502	185	0.0008244	5.3647	1	1	2	1	2	0	18.9	0	18.9	0	149840	0	79384	0	2874.4	0	3474.5	0.669261	2.23422	7.8648	0.36886	6.39002	0	100710	0	69296	1029.5	846	1001	784	0	2	0	2
PBANKA_1359100	nuclear import protein MOG1	1359100			19.806	167	0	27.364	1	1	2	1	2	0	17.4	0	17.4	0	105990	0	88902	0	3623.7	0	3301.8	0.621605	2.07364	8.19901	0.0690549	6.31647	0	56968	0	58974	1029.5	846	1001	784	0	2	0	2
PBANKA_0815200	phospholipid or glycerol acyltransferase	815200			51.222	431	0.00081169	4.9139	1	1	2	1	2	0	7.7	0	7.7	0	113720	0	94940	0	2999.5	0	2180.2	0.581849	2.34832	7.92626	0.260577	5.71768	0	68462	0	63353	1029.5	846	1001	784	0	2	0	2
PBANKA_1450100	N6-adenosine-methyltransferase	1450100			76.327	660	0	9.2578	1	1	2	1	3	0	4.7	0	8.6	0	127910	0	150390	0	1568	0	1342.4	0.56142	2.45863	6.99047	0.286875	5.01803	0	91883	0	83083	1029.5	846	1001	625	0	2	0	3
PBANKA_1416400	nucleolar complex protein 4	1416400			107.25	911	0	18.417	1	1	2	1	3	0	4.5	0	6.1	0	132550	0	118430	0	1888.2	0	1016.2	0.532663	2.27471	7.25855	0.461616	4.6164	0	93443	0	66645	1029.5	846	1001	625	0	2	0	3
PBANKA_0721900	60S ribosomal protein L7ae/L30e	721900			27.456	234	0	17.083	1	1	2	1	2	0	13.2	0	13.2	0	178160	0	122050	0	6726	0	1723.5	0.496049	2.45211	9.09129	0.347535	5.37856	0	103470	0	80776	1029.5	846	1001	784	0	2	0	2
PBANKA_0402100	spindle pole body protein	GCP3A			217.57	1824	0	5.6153	1	1	2	1	2	0	1.4	0	1.2	0	87419	0	159880	0	3751.8	0	948.69	0.471663	2.24	8.24912	0.430102	4.51723	0	0	0	0	1029.5	846	1001	784	0	2	0	2
PBANKA_0811100	helicase SKI2W	811100			157.78	1363	0	7.6201	1	1	2	1	1	0	2.2	0	0	0	154470	0	0	0	223.86	0	0	0.101104	2.39045	4.18221	0.305349	0.359175	0	0	0	0	1029.5	846	1001	955	0	2	0	1
PBANKA_1128500	SET domain protein	1128500			727.52	6199	0.00078864	4.2692	1	1	2	1	0	0	0.3	0	0	0	33347000	0	0	0	65.191	0	0	0.103309	2.19054	2.40236	0.257828	0.216661	0	0	0	0	1029.5	846	1001	1090.5	0	2	0	0
PBANKA_1313400	exosome complex exonuclease RRP6	1313400			127.84	1087	0.00078555	4.2129	1	1	2	0	0	0	2.9	0	0	0	104250	0	0	0	272.68	0	0	0.0915832	2.03836	4.46682	0.188686	0.40708	0	0	0	0	1029.5	846	1001	1090.5	0	2	0	0
PBANKA_1119700	cleavage stimulation factor subunit 1	1119700			66.468	573	0	9.1723	1	1	2	1	1	0	5.2	0	0	0	177060	0	0	0	3065.3	0	0	0.0868999	2.05754	7.95757	0.409369	0.460943	0	0	0	0	1029.5	846	1001	955	0	2	0	1
PBANKA_1407800	U4/U6 small nuclear ribonucleoprotein PRP3	PRPF3			79.613	679	0	8.9318	1	1	2	1	0	0	4.7	0	0	0	132210	0	0	0	909.2	0	0	0.0841927	2.29449	6.20421	0.423717	0.291811	0	0	0	0	1029.5	846	1001	1090.5	0	2	0	0
PBANKA_0104400	nucleoside diphosphate kinase	NDK			196.41	1657	0.00081301	4.9393	1	1	2	0	0	0	1.4	0	0	0	115280	0	0	0	579.38	0	0	0.0797252	2.44659	5.55412	0.292096	0.345763	0	0	0	0	1029.5	846	1001	1090.5	0	2	0	0
PBANKA_1227400	serine/threonine protein phosphatase 2B catalytic subunit A	CNA			61.095	531	0.00082102	5.2343	1	1	2	1	1	0	7.5	0	0	0	200960	0	0	0	5169.9	0	0	0.080393	2.47376	8.71168	0.473077	0.426154	0	0	0	0	1029.5	846	1001	955	0	2	0	1
PBANKA_0621400	RNA-binding protein	621400			133.59	1132	0	7.5802	1	1	2	1	0	0	2.8	0	0	0	116530	0	0	0	833.13	0	0	0.0755462	2.25057	6.07816	0.132615	0.496589	0	0	0	0	1029.5	846	1001	1090.5	0	2	0	0
PBANKA_0821800	U4/U6 snRNA-associated-splicing factor	821800			57.998	491	0.00077882	4.0846	1	1	2	1	0	0	6.9	0	0	0	109330	0	0	0	1700	0	0	0.0700898	2.25982	7.10708	0.258498	0.398027	0	0	0	0	1029.5	846	1001	1090.5	0	2	0	0
PBANKA_1230800	pyridoxal kinase	PDXK			37.839	331	0	23.082	1	1	2	1	1	0	7.9	0	0	0	252490	0	0	0	9359.7	0	0	0.0686477	2.31676	9.568	0.373435	0.442427	0	0	0	0	1029.5	846	1001	955	0	2	0	1
PBANKA_1326000	GTP-binding protein	1326000			153.36	1297	0	10.006	1	1	2	1	1	0	1.9	0	0	0	215400	0	0	0	1741.6	0	0	0.0681069	2.40074	7.14196	0.334573	0.315351	0	0	0	0	1029.5	846	1001	955	0	2	0	1
PBANKA_1129700	ATP-dependent RNA helicase HAS1	1129700			67.799	591	0	6.2735	1	1	2	0	0	0	3.9	0	0	0	93338	0	0	0	2250.5	0	0	0.0655183	2.3262	7.51179	0.347035	0.297534	0	0	0	0	1029.5	846	1001	1090.5	0	2	0	0
PBANKA_1462000	THUMP domain-containing protein	1462000			37.608	324	0	8.4087	1	1	2	1	1	0	10.2	0	0	0	140470	0	0	0	2295.5	0	0	0.0669912	2.0378	7.54035	0.185524	0.456128	0	0	0	0	1029.5	846	1001	955	0	2	0	1
PBANKA_1023600	conserved Plasmodium protein, unknown function	1023600			54.907	460	0	10.704	1	1	2	1	1	0	6.5	0	0	0	205960	0	0	0	7144.1	0	0	0.0622779	2.04674	9.17829	0.453551	0.24552	0	0	0	0	1029.5	846	1001	955	0	2	0	1
PBANKA_1322500	DNA-directed RNA polymerase III subunit RPC5	1322500			87.158	739	0.0041929	2.4909	1	1	2	0	1	0	5.1	0	0	0	74843	0	0	0	651.66	0	0	0.061972	2.16852	5.72373	0.234715	0.254384	0	0	0	0	1029.5	846	1001	955	0	2	0	1
PBANKA_0112000	syntaxin-binding protein	112000			76.589	648	0.00076336	3.7073	1	1	2	0	0	0	5.9	0	0	0	63541	0	0	0	1652.7	0	0	0.0583253	2.27258	7.06637	0.239651	0.305046	0	0	0	0	1029.5	846	1001	1090.5	0	2	0	0
PBANKA_1348500	Voldacs domain-containing protein	1348500			28.763	246	0	7.8575	1	1	2	1	0	0	10.6	0	0	0	101610	0	0	0	1847.3	0	0	0.0563121	2.26029	7.22696	0.281547	0.2527	0	0	0	0	1029.5	846	1001	1090.5	0	2	0	0
PBANKA_0716500	male development protein MD5	716500			45.133	388	0	6.1105	1	1	2	1	1	0	9.5	0	0	0	78972	0	0	0	635.29	0	0	0.0542462	2.49123	5.68703	0.148945	0.294694	0	0	0	0	1029.5	846	1001	784	0	2	0	2
PBANKA_0505300	conserved Plasmodium protein, unknown function	505300			193.39	1618	0	6.1503	1	1	2	1	1	0	1.2	0	0	0	62260	0	0	0	387.89	0	0	0.0546168	2.28432	4.97526	0.188168	0.208327	0	0	0	0	1029.5	846	1001	784	0	2	0	2
PBANKA_1306400	geranylgeranyl transferase type-2 subunit alpha	1306400			84.242	699	0.00078927	4.2746	1	1	2	1	0	0	3.7	0	0	0	156150	0	0	0	1821.6	0	0	0.0545024	2.28889	7.20675	0.135391	0.382145	0	0	0	0	1029.5	846	1001	1090.5	0	2	0	0
PBANKA_0213500	ribosome biogenesis protein BRX1	213500			41.623	349	0	6.0685	1	1	2	1	1	0	6.9	0	0	0	82809	0	0	0	3318.8	0	0	0.05058	2.38088	8.0722	0.166979	0.361738	0	0	0	0	1029.5	846	1001	955	0	2	0	1
PBANKA_0618800	ATP-dependent RNA helicase DDX31	618800			91.543	791	0	22.666	1	1	2	1	1	0	3.2	0	0	0	164510	0	0	0	790.79	0	0	0.0505286	2.05167	6.00291	0.239209	0.167778	0	0	0	0	1029.5	846	1001	955	0	2	0	1
PBANKA_1135400	riboflavin kinase	1135400			82.379	706	0.0014399	2.923	1	1	2	1	1	0	4.1	0	0	0	131040	0	0	0	764.75	0	0	0.0488182	2.45144	5.9546	0.0228266	0.387541	0	0	0	0	1029.5	846	1001	955	0	2	0	1
PBANKA_0409100	pre-mRNA splicing factor	409100			50.307	422	0	22.627	1	1	2	1	1	0	5.9	0	0	0	102400	0	0	0	5674.3	0	0	0.047607	2.12507	8.84598	0.0660147	0.456284	0	0	0	0	1029.5	846	1001	955	0	2	0	1
PBANKA_1027300	Btz domain-containing protein	1027300			151.15	1263	0	9.3042	1	1	2	0	1	0	2.3	0	0	0	129760	0	0	0	918.67	0	0	0.0449135	2.4796	6.21916	0.194845	0.195847	0	0	0	0	1029.5	846	1001	955	0	2	0	1
PBANKA_0520900	antigen UB05	520900			13.978	119	0.00076394	3.719	1	1	2	0	0	0	12.6	0	0	0	176330	0	0	0	46596	0	0	0.0459309	2.34021	11.8837	0.213528	0.439788	0	0	0	0	1029.5	846	1001	1090.5	0	2	0	0
PBANKA_1435300	pre-mRNA-processing factor 17	1435300			72.765	626	0.00080906	4.7786	1	1	2	0	0	0	6.2	0	0	0	1275900	0	0	0	31070	0	0	0.0452125	2.34326	11.299	0.138356	0.478445	0	0	0	0	1029.5	846	1001	1090.5	0	2	0	0
PBANKA_1015900	transcription initiation TFIID-like	1015900			37.821	332	0	6.9129	1	1	2	0	0	0	7.8	0	0	0	192980	0	0	0	2782.9	0	0	0.0467236	2.14327	7.81813	0.18439	0.281043	0	0	0	0	1029.5	846	1001	1090.5	0	2	0	0
PBANKA_1027500	DNA-directed RNA polymerases I and III subunit RPAC2	1027500			10.858	96	0	60.409	1	1	2	1	1	0	38.5	0	0	0	441430	0	0	0	47770	0	0	0.0439412	2.05213	11.9196	0.171566	0.442368	0	0	0	0	1029.5	846	1001	955	0	2	0	1
PBANKA_1345000	PITH domain-containing protein	1345000			23.313	206	0	10.295	1	1	2	0	2	0	18.4	0	19.9	0	145800	0	165470	0	8414.7	0	0	0.0368006	2.46411	9.41445	0.431066	0.00607197	0	0	0	0	1029.5	846	1001	784	0	2	0	2
PBANKA_1228700	nucleolar protein 10	1228700			65.957	567	0	11.018	1	1	2	0	1	0	5.5	0	0	0	149120	0	0	0	3079.8	0	0	0.0350338	2.28899	7.96438	0.280423	0.0787919	0	0	0	0	1029.5	846	1001	955	0	2	0	1
PBANKA_1311000	conserved protein, unknown function	1311000			54.803	465	0	6.0266	1	1	2	0	0	0	4.7	0	0	0	152030	0	0	0	9050.3	0	0	0.0337399	2.08566	9.51951	0.366655	0.0249031	0	0	0	0	1029.5	846	1001	1090.5	0	2	0	0
PBANKA_1333000	mediator of RNA polymerase II transcription subunit 22	1333000			18.494	159	0.0014327	2.8877	1	1	2	0	0	0	12.6	0	0	0	73518	0	0	0	4363.1	0	0	0.0334125	2.14997	8.4669	0.248892	0.105844	0	0	0	0	1029.5	846	1001	1090.5	0	2	0	0
PBANKA_0808800	prefoldin-like protein	808800			35.25	302	0	14.788	1	1	2	1	1	0	10.3	0	0	0	166550	0	0	0	4106.6	0	0	0.0327034	2.32026	8.37949	0.167526	0.182392	0	0	0	0	1029.5	846	1001	955	0	2	0	1
PBANKA_1438900	GTP cyclohydrolase 1	1438900			34.31	293	0	11.645	1	1	2	1	1	0	10.6	0	0	0	91311	0	0	0	694.88	0	0	0.0311673	2.32528	5.81638	0.068909	0.184844	0	0	0	0	1029.5	846	1001	955	0	2	0	1
PBANKA_0601100	mitochondrial phosphate carrier protein	PIC			36.478	323	0	7.9155	1	1	2	1	1	0	6.8	0	0	0	305300	0	0	0	12882	0	0	0.0317708	2.00701	10.0288	0.30843	0.0739578	0	0	0	0	1029.5	846	1001	955	0	2	0	1
PBANKA_1445200	WD repeat-containing protein	1445200			50.924	434	0	5.8227	1	1	2	0	0	0	7.4	0	0	0	208710	0	0	0	5454.6	0	0	0.0253604	2.44477	8.78902	0.26654	0.0183536	0	0	0	0	1029.5	846	1001	1090.5	0	2	0	0
PBANKA_1031200	DnaJ protein	1031200			66.033	569	0	13.626	1	1	2	1	0	0	4.6	0	0	0	96203	0	0	0	1686.4	0	0	0.0258688	2.1008	7.09549	0.187963	0.049934	0	0	0	0	1029.5	846	1001	1090.5	0	2	0	0
PBANKA_1344100	myosin F	MyoF			228.25	1965	0	48.478	1	1	2	1	1	0	1.5	0	0	0	588800	0	0	0	253.44	0	0	0.0236687	2.41626	4.36126	0.116652	0.043763	0	0	0	0	1029.5	846	1001	955	0	2	0	1
PBANKA_1335200	pre-mRNA-splicing factor ISY1	1335200			23.668	201	0.00074349	3.3331	1	1	2	0	0	0	23.9	0	0	0	130940	0	0	0	17910	0	0	0.0231247	2.24454	10.5042	0.276248	0.0185633	0	0	0	0	1029.5	846	1001	1090.5	0	2	0	0
PBANKA_1454100	ATP-dependent zinc metalloprotease FTSH 1	1454100			98.48	862	0	16.55	1	1	2	1	1	0	3.7	0	0	0	102520	0	0	0	1370	0	0	0.0224086	2.06508	6.79572	0.0136994	0.184858	0	0	0	0	1029.5	846	1001	955	0	2	0	1
PBANKA_1024700	ubiquitin fusion degradation protein 1	UFD1			32.059	278	0	15.047	1	1	2	0	0	0	9.7	0	0	0	432240	0	0	0	9052.4	0	0	0.0189265	2.41352	9.51984	0.0485161	0.17734	0	0	0	0	1029.5	846	1001	1090.5	0	2	0	0
PBANKA_1356900	U4/U6 small nuclear ribonucleoprotein PRP4	1356900			71.804	615	0	7.5941	1	1	2	1	0	0	4.6	0	0	0	265800	0	0	0	4696.9	0	0	0.0102819	2.17686	8.57325	0.0579518	0.0525798	0	0	0	0	1029.5	846	1001	1090.5	0	2	0	0
PBANKA_1030600	phospholipase PL39	1030600			38.777	328	0	63.545	1	0	3	6	4	0	14.3	23.5	18.3	0	305040	785770	854220	0	0	110760	46222	4.33389	2.0299	2.44243	9.25887	10.1237	0	173310	295250	355290	1029.5	676.5	299	416.5	0	3	7	5
PBANKA_1326900	DNA polymerase alpha subunit B	POLA-B	DNA replication & repair		63.655	541	0	48.06	1	0	3	5	2	0	7.2	12	5	0	281570	446630	255860	0	0	32802	14888	3.4305	2.22599	2.4359	7.50329	8.4893	0	150520	248410	215230	1029.5	676.5	416.5	784	0	3	5	2
PBANKA_1359000	protein transport protein SEC61 subunit alpha	SEC61A			52.298	472	0	8.0943	1	1	3	5	2	0	6.1	10.6	3.8	0	376270	468960	258740	0	2986.3	71984	29310	1.76864	2.31603	7.9199	8.63718	9.46654	0	203630	233810	133210	1029.5	676.5	416.5	625	0	3	5	3
PBANKA_1463200	vacuolar protein sorting-associated protein 26	VPS26			34.617	297	0	15.607	1	1	3	4	2	0	15.2	18.2	11.1	0	407810	150100	127840	0	2342.3	26364	6367.9	1.48779	2.14437	7.56947	7.18808	7.26404	0	136700	127390	202870	1029.5	676.5	499	784	0	3	4	2
PBANKA_1409900	AP-1 complex subunit mu-1	AP1M1			52.909	459	0	7.7438	1	0	3	3	1	0	6.5	6.5	0	0	307350	284620	0	0	0	34939	0	1.89979	2.16948	2.04042	7.59435	0.403558	0	163410	185520	0	1029.5	676.5	607	955	0	3	3	1
PBANKA_1419100	dihydrolipoyllysine-residue succinyltransferase component of 2-oxoglutarate dehydrogenase complex	1419100			47.831	423	0	19.251	1	1	3	3	4	0	8.3	14.2	13	0	151960	449600	367070	0	2729.4	39624	15268	1.64446	2.1229	7.79013	7.77588	8.52566	0	231370	344020	192840	1029.5	676.5	607	505	0	3	3	4
PBANKA_0706700	dicarboxylate/tricarboxylate carrier	DTC			35.631	319	0	8.0573	1	0	3	2	2	0	9.4	6.6	6.6	0	173550	97351	63099	0	0	15905	4635.8	2.89302	2.17651	2.40868	6.45899	6.80604	0	77358	70314	41459	1029.5	676.5	763	784	0	3	2	2
PBANKA_0619200	secreted ookinete protein	PSOP1			54.714	479	0	7.797	1	1	2	2	2	0	3.5	3.8	4.4	0	221440	72400	272200	0	3970.1	26612	2896	1.28052	2.07821	8.33072	7.20159	6.12728	0	0	0	0	1029.5	676.5	763	625	0	3	2	3
PBANKA_0941200	tRNA-splicing ligase RtcB	941200			56.31	507	0	17.782	1	1	3	2	3	0	10.5	4.9	10.3	0	291630	153260	276050	0	2496.1	29490	6966.2	1.51277	2.08466	7.66122	7.34973	7.39359	0	121050	0	133460	1029.5	676.5	763	625	0	3	2	3
PBANKA_1449000	microgamete surface protein MiGS	MiGS			65.381	577	0	18.324	1	1	3	2	3	0	8	4.9	9.4	0	816760	267910	456060	0	5526.9	46775	8930.3	1.42958	2.22124	8.80801	8.01525	7.75193	0	352700	171120	197090	1029.5	676.5	763	625	0	3	2	3
PBANKA_0920900	protein disulfide-isomerase	920900			51.471	429	0	32.135	1	1	3	2	3	0	11.2	8.9	12.1	0	206160	212620	288430	0	4838.4	35587	9244.2	1.41466	2.28595	8.61607	7.62086	7.80177	0	86216	156120	120070	1029.5	676.5	763	625	0	3	2	3
PBANKA_1347600	eukaryotic translation initiation factor 6	1347600			27.214	247	0	26.499	1	1	3	2	2	0	19	12.6	12.6	0	592160	478830	452330	0	30790	120590	39797	1.43518	2.15447	11.2859	9.38155	9.90781	0	284840	308850	285910	1029.5	676.5	763	784	0	3	2	2
PBANKA_0519700	phosducin-like protein 2	519700			24.947	213	0	34.476	1	1	3	2	1	0	17.8	13.6	0	0	282670	129000	0	0	3735.1	22301	0	0.692482	2.20543	8.24269	6.94662	0.288516	0	145660	107710	0	1029.5	676.5	763	955	0	3	2	1
PBANKA_1241900	ubiquitin-conjugating enzyme E2 13	UBC13			17.205	151	0.0041783	2.4397	1	0	2	0	0	0	14.6	0	0	0	229760	0	0	0	0	0	0	0.181457	2.14233	2.473	0.39506	0.442422	0	0	0	0	1029.5	676.5	1001	1090.5	0	3	0	0
PBANKA_0822700	ribosome production factor 1	822700			39.707	333	0	7.5495	1	0	2	1	0	0	6.6	0	0	0	72274	0	0	0	0	0	0	0.130743	2.18913	2.45919	0.353418	0.254317	0	0	0	0	1029.5	676.5	1001	1090.5	0	3	0	0
PBANKA_1438300	phospholipid-transporting ATPase	1438300			187.84	1603	0	5.6688	1	0	3	1	3	0	2.4	0	2.4	0	267360	0	238850	0	0	0	976.34	1.0698	2.25133	2.23135	0.236882	4.55867	0	104190	0	112930	1029.5	676.5	1001	625	0	3	0	3
PBANKA_1336700	conserved Plasmodium protein, unknown function	1336700			69.862	607	0	7.2176	1	0	3	1	1	0	7.1	0	0	0	101390	0	0	0	0	0	0	0.0711395	2.48656	2.26205	0.250568	0.0872461	0	0	0	0	1029.5	676.5	1001	955	0	3	0	1
PBANKA_1130900	large subunit rRNA methyltransferase	1130900			114.84	978	0.00075815	3.5792	1	0	3	1	1	0	3.9	0	0	0	161750	0	0	0	0	0	0	0.0204551	2.07106	2.2615	0.0142822	0.0743407	0	0	0	0	1029.5	676.5	1001	955	0	3	0	1
PBANKA_1035500	vacuolar protein sorting-associated protein 29	VPS29			21.541	191	0	30.604	1	1	3	1	3	0	17.3	0	17.3	0	320400	0	833460	0	10975	0	53588	0.879155	2.3595	9.79769	0.351002	10.3371	0	266220	0	545380	1029.5	676.5	1001	625	0	3	0	3
PBANKA_1417900	conserved protein, unknown function	1417900			124.13	1052	0	9.615	1	1	3	1	2	0	3.9	0	2.9	0	125590	0	166270	0	1025.4	0	872.79	0.559072	2.35654	6.37773	0.486161	4.39692	0	0	0	0	1029.5	676.5	1001	784	0	3	0	2
PBANKA_1440100	DNA-binding protein	1440100			97.524	840	0	7.4094	1	1	3	1	0	0	5.2	0	0	0	148880	0	0	0	1145.6	0	0	0.0595329	2.0092	6.53765	0.212878	0.295941	0	0	0	0	1029.5	676.5	1001	1090.5	0	3	0	0
PBANKA_0802100	phosphoinositide-binding protein	802100			93.102	796	0	11.053	1	1	3	1	0	0	5.5	0	0	0	199280	0	0	0	3354.3	0	0	0.031047	2.30211	8.08755	0.140583	0.181985	0	0	0	0	1029.5	676.5	1001	1090.5	0	3	0	0
PBANKA_1007200	replication protein A1, large subunit	RPA1			135.59	1170	0	34.687	1	1	4	5	4	0	3.3	5.1	4.1	0	257080	457520	398430	0	1933.7	19325	7148.8	1.49254	2.20159	7.29291	6.73998	7.43092	0	176570	153550	177070	1029.5	563.5	349.5	505	0	4	6	4
PBANKA_0836800	erythrocyte membrane associated protein 1	EMAP1			38.263	330	0	19.784	1	1	3	4	3	0	11.5	14.8	10	0	625540	451840	350550	0	9596	53460	18558	1.40808	2.47995	9.60398	8.20797	8.80719	0	328050	273220	307720	1029.5	563.5	499	625	0	4	4	3
PBANKA_1105400	small ubiquitin-related modifier	SUMO			10.842	99	0	24.324	1	1	4	4	3	0	51.5	51.5	27.3	0	507740	468020	400500	0	19400	229620	68035	1.60833	2.4326	10.6195	10.3107	10.6814	0	218480	241330	160370	1029.5	563.5	499	505	0	4	4	4
PBANKA_1217000	peptidase	1217000			102.05	871	0	30.646	1	1	4	3	2	0	7.3	6.1	3.6	0	488390	255720	98502	0	2577.4	13299	3151.8	1.27636	2.04698	7.70746	6.20083	6.24939	0	154200	152500	126010	1029.5	563.5	499	784	0	4	4	2
PBANKA_0516600	leucine-rich repeat protein 1	LRR1			36.735	310	0	35.064	1	0	2	3	2	0	10.6	14.8	10.6	0	172330	183930	197760	0	0	29501	10218	3.44348	2.05245	2.38972	7.35027	7.94626	0	86962	94596	171890	1029.5	563.5	607	784	0	4	3	2
PBANKA_1000600	erythrocyte membrane antigen 1	1000600			35.834	319	0	55.7	1	1	4	3	4	0	18.5	12.2	18.5	0	1371600	1027300	917700	0	55066	376090	102730	1.52501	2.49719	12.1246	11.0225	11.2759	0	672480	727780	620700	1029.5	563.5	607	505	0	4	3	4
PBANKA_1323000	conserved protein, unknown function	1323000			39.699	339	0	25.233	1	1	4	3	0	0	11.8	8.6	0	0	304520	233660	0	0	4045.5	29673	0	0.742746	2.19156	8.35786	7.35866	0.476882	0	0	0	0	1029.5	563.5	607	1090.5	0	4	3	0
PBANKA_1128600	cullin-like protein	CULL			120.09	1005	0	13.847	1	1	4	2	2	0	5.2	2.8	2.8	0	585700	175250	184100	0	1502.5	18378	3129.5	1.38884	2.36417	6.92891	6.66749	6.23915	0	218960	152850	154170	1029.5	563.5	763	784	0	4	2	2
PBANKA_1458300	kinesin-13	kinesin-13			117.18	1025	0	24.622	1	1	4	2	2	0	4.1	1.4	2	0	176160	79429	101980	0	838.84	8611.9	1726.7	1.34592	2.0515	6.08801	5.57391	5.38124	0	49456	73362	0	1029.5	563.5	763	784	0	4	2	2
PBANKA_1011500	PHD finger protein PHD2	1011500			565.02	4789	0	6.4934	1	1	4	1	0	0	1.4	0	0	0	258370	0	0	0	390.79	0	0	0.0666755	2.19168	4.98601	0.434278	0.0442983	0	0	0	0	1029.5	563.5	1001	1090.5	0	4	0	0
PBANKA_0934200	ubiquitin domain-containing protein DSK2	DSK2			41.26	375	0	26.617	1	1	4	0	1	0	22.7	0	0	0	590120	0	0	0	20696	0	0	0.0311792	2.38293	10.7128	0.0899119	0.318403	0	0	0	0	1029.5	563.5	1001	955	0	4	0	1
PBANKA_0108700	RNA-binding protein 25	RBM25			80.593	679	0	12.128	1	1	4	0	0	0	7.1	0	0	0	206940	0	0	0	1187.6	0	0	0.0122368	2.40228	6.58959	0.079419	0.0306127	0	0	0	0	1029.5	563.5	1001	1090.5	0	4	0	0
PBANKA_0914200	conserved Plasmodium protein, unknown function	914200			218.17	1844	0	11.409	1	1	4	1	0	0	2.8	0	0	0	233750	0	0	0	227.68	0	0	0.00817048	2.12695	4.20662	0.0454269	0.00632143	0	0	0	0	1029.5	563.5	1001	1090.5	0	4	0	0
PBANKA_0507300	dynein heavy chain	DHC4B	KT_spindle_MTOC		623.48	5309	0	7.5733	1	0	4	1	0	0	1	0	0	0	441660	0	0	0	0	0	0	0.176804	2.22822	2.2019	0.307895	0.475367	0	0	0	0	1029.5	473	1001	1090.5	0	5	0	0
PBANKA_0610800	eukaryotic translation initiation factor eIF2A	610800			72.943	630	0	97.547	1	1	5	5	5	0	11.1	11	10.5	0	484880	461560	555560	0	1716.7	44670	13575	1.69693	2.48728	7.12118	7.94881	8.3561	0	221410	241360	198030	1029.5	396.5	416.5	416.5	0	6	5	5
PBANKA_0617200	40S ribosomal protein S10	RPS10	ribosome		16.627	137	0	54.364	1	1	2	2	2	0	22.6	22.6	22.6	0	1243500	651380	1119500	0	50474	30315	108560	1.324	2.15889	11.999	7.38954	11.3556	0	888860	376590	754020	1029.5	396.5	499	505	0	6	4	4
PBANKA_0402800	EH domain-containing protein	EHD			61.595	529	0	31.259	1	1	6	2	3	0	12.3	4.5	7	0	302210	162980	145470	0	2830.6	20278	4656.5	1.37076	2.0948	7.84265	6.80942	6.81246	0	106960	129840	101110	1029.5	396.5	763	625	0	6	2	3
PBANKA_0943200	casein kinase II beta chain	CK2beta1			27.978	243	0	30.133	1	2	1	3	3	12.8	0	15.6	17.7	885230	0	683550	887820	19984	0	43114	10761	1.18629	10.9261	2.49269	7.89766	8.02096	687730	0	510120	595990	816.5	1049.5	499	505	2	0	4	4
PBANKA_1403400	DNA-directed RNA polymerase II subunit RPB11	RPB11	expression		14.206	126	0	59.574	1	2	1	2	1	27	0	27	0	1008100	0	620940	0	66227	0	2326.3	0	0.275047	12.6547	2.26979	3.68562	0.41932	784620	0	903430	0	816.5	1049.5	499	955	2	0	4	1
PBANKA_0512500	ribosome biogenesis protein RPF2	512500			47.568	398	0	8.0299	1	2	0	2	2	14.1	0	6.3	5.3	83642	0	49997	84768	4709.3	0	12134	2777.6	1.10883	8.84087	2.10365	6.06856	6.06706	0	0	0	0	816.5	1049.5	607	784	2	0	3	2
PBANKA_1348800	origin recognition complex subunit 4	ORC4	DNA replication & repair		105.78	885	0	18.964	1	2	0	3	4	3.3	0	4.6	6.3	70003	0	169560	362100	7704.2	0	12295	3323.1	1.0741	9.551	2.00597	6.08758	6.32575	85809	0	125670	101340	816.5	1049.5	607	505	2	0	3	4
PBANKA_0300600	Plasmodium exported protein, unknown function	PHIST			72.473	650	0	18.63	1	2	1	3	2	5.2	0	8	7.5	336260	0	760490	124420	1592.5	0	49625	26543	1.85429	7.27665	2.11998	8.10058	9.32348	0	0	0	0	816.5	1049.5	607	784	2	0	3	2
PBANKA_1127000	choline/ethanolaminephosphotransferase	CEPT			44.521	390	0	18.351	1	2	1	2	2	4.9	0	4.9	4.9	631290	0	586370	489870	44534	0	182210	53306	1.41171	12.0822	2.30217	9.97704	10.3294	495030	0	458340	373410	816.5	1049.5	607	784	2	0	3	2
PBANKA_1212700	SPRY domain-containing protein	1212700			237.29	2017	0	6.1721	1	2	1	2	1	0.9	0	0.9	0	1002200	0	10359000	0	607.83	0	248110	0	1.34589	5.88709	2.02143	10.4224	0.221591	2548700	0	10704000	0	816.5	1049.5	607	955	2	0	3	1
PBANKA_0623100	tryptophan-rich protein IPIS3	623100			93.143	793	0	25.898	1	2	0	2	3	23.7	0	3.2	3.8	58302	0	119080	160180	2103.2	0	6897.5	3218.5	1.14079	7.67794	2.43194	5.25365	6.27961	0	0	0	0	816.5	1049.5	763	625	2	0	2	3
PBANKA_1427000	protein phosphatase PPM7	1427000			34.663	305	0	10.365	1	2	0	2	3	9.5	0	11.1	15.1	185440	0	114250	242320	6515.9	0	10826	1519	0.960846	9.30932	2.24336	5.90401	5.19634	119100	0	83452	132800	816.5	1049.5	763	625	2	0	2	3
PBANKA_1204800	phosducin-like protein 3	PhLP3			22.938	193	0	6.3562	1	2	0	2	1	12.4	0	12.4	0	140920	0	185750	0	4224.9	0	29353	0	0.677825	8.68427	2.48167	7.34302	0.225532	99755	0	144140	0	816.5	1049.5	763	955	2	0	2	1
PBANKA_1022800	glycine--tRNA ligase	GlyRS			95.04	812	0	33.552	1	2	0	2	1	4.2	0	3.2	0	165490	0	113330	0	2052	0	8113.4	0	0.586613	7.64239	2.24587	5.48789	0.31269	0	0	0	0	816.5	1049.5	763	955	2	0	2	1
PBANKA_1111600	prefoldin subunit 6	1111600			13.876	119	0	26.52	1	2	1	2	2	19.3	0	19.3	19.3	480560	0	577400	586600	83801	0	262960	82486	1.40547	12.9943	2.27865	10.5063	10.9593	295870	0	418830	394670	816.5	1049.5	763	784	2	0	2	2
PBANKA_1142900	suppressor of kinetochore protein 1	SKP1			18.936	162	0	16.132	1	2	1	2	2	14.8	0	11.7	14.8	876000	0	310890	675640	84455	0	292290	38862	1.36147	13.0055	2.07555	10.6588	9.87351	471740	0	0	422320	816.5	1049.5	763	784	2	0	2	2
PBANKA_0921500	small nuclear ribonucleoprotein F	SNRPF			10.031	86	0	12.204	1	2	1	2	3	22.1	0	22.1	32.6	307070	0	165350	189930	27133	0	111830	23621	1.34615	11.3673	2.32207	9.27274	9.15522	174170	0	127230	82381	816.5	1049.5	763	625	2	0	2	3
PBANKA_0314200	calcium-dependent protein kinase 1	CDPK1			60.809	523	0	55.03	1	2	1	2	2	4.8	0	5.2	5.2	119910	0	190920	154090	4402.5	0	16173	5454.8	1.22962	8.74368	2.25473	6.4831	7.04074	0	0	0	0	816.5	1049.5	763	784	2	0	2	2
PBANKA_0512700	conserved Plasmodium protein, unknown function	512700			17.014	151	0	17.022	1	2	1	2	3	21.2	0	19.2	29.8	153680	0	187020	384800	34982	0	80268	17001	1.26921	11.7339	2.03457	8.79433	8.68077	108350	0	171150	197630	816.5	1049.5	763	625	2	0	2	3
PBANKA_1227200	peptidyl-prolyl cis-trans isomerase	1227200			69.229	582	0.00074294	3.327	1	2	1	2	2	4.6	0	4.6	4.6	179000	0	311210	539360	17979	0	39393	10374	1.21755	10.7736	2.15038	7.76745	7.96812	132300	0	276510	465250	816.5	1049.5	763	784	2	0	2	2
PBANKA_1026300	conserved protein, unknown function	SYCP2L1			76.748	649	0	17.852	1	2	1	2	4	3.4	0	3.4	7.7	212510	0	297360	429160	10061	0	24224	8260	1.21371	9.93606	2.17989	7.06595	7.63936	132360	0	220850	174790	816.5	1049.5	763	505	2	0	2	4
PBANKA_0919600	CCR4-NOT transcription complex subunit 2	NOT2			77.085	665	0	22.031	1	2	1	2	2	3.5	0	3.5	4.1	61953	0	55625	147640	4762.6	0	10478	1794.4	1.02756	8.8571	2.13358	5.85687	5.43672	39784	0	58815	0	816.5	1049.5	763	784	2	0	2	2
PBANKA_1212000	conserved Plasmodium protein, unknown function	1212000			254.88	2133	0	13.451	1	2	1	2	2	1.5	0	1.5	1.5	2906200	0	4368700	3668800	390.96	0	2453.9	514.32	1.01463	5.25045	2.0395	3.76266	3.63396	3848700	0	4692600	3627100	816.5	1049.5	763	784	2	0	2	2
PBANKA_0516700	RNA polymerase II-associated protein 1	516700			183.83	1538	0	18.724	1	2	1	2	0	1.8	0	1.8	0	119150	0	76344	0	0	0	3013.4	0	1.12573	2.00146	2.0453	4.05897	0.49658	66639	0	51436	0	816.5	1049.5	763	1090.5	2	0	2	0
PBANKA_0512400	rRNA-processing protein EBP2	512400			45.289	385	0	41.447	1	2	1	2	1	7	0	7	0	143720	0	117870	0	3201.6	0	28854	0	0.736581	8.28415	2.23536	7.31828	0.430192	124930	0	83025	0	816.5	1049.5	763	955	2	0	2	1
PBANKA_1145700	U2 small nuclear ribonucleoprotein A	1145700			20.463	175	0	13.136	1	2	1	2	1	12.6	0	11.4	0	203110	0	124610	0	5743.1	0	43155	0	0.714875	9.12718	2.40467	7.89904	0.344807	0	0	0	0	816.5	1049.5	763	955	2	0	2	1
PBANKA_1316400	U1 snRNP-associated protein	1316400			37.657	318	0	29.312	1	2	1	2	1	6.9	0	8.5	0	100940	0	127830	0	1742.2	0	16097	0	0.724685	7.40626	2.12442	6.4763	0.430444	0	0	0	0	816.5	1049.5	763	955	2	0	2	1
PBANKA_1451500	conserved Plasmodium protein, unknown function	1451500			43.098	369	0.00076864	3.7817	1	2	1	2	1	4.6	0	4.6	0	91664	0	141590	0	9629.2	0	36549	0	0.665778	9.87277	2.35389	7.65934	0.480907	68953	0	112660	0	816.5	1049.5	763	955	2	0	2	1
PBANKA_1112900	CPSF domain-containing protein	1112900			257.86	2165	0	5.6859	1	2	0	1	0	1.1	0	0	0	112730	0	0	0	0	0	0	0	0.184815	2.08351	2.35096	0.382368	0.437188	0	0	0	0	816.5	1049.5	1001	1090.5	2	0	0	0
PBANKA_0714800	ribosome assembly protein RRB1	714800			50.693	444	0.0014378	2.9012	1	2	0	0	0	7.2	0	0	0	273110	0	0	0	0	0	0	0	0.149693	2.49454	2.40892	0.295428	0.438586	0	0	0	0	816.5	1049.5	1001	1090.5	2	0	0	0
PBANKA_1452800	pre-mRNA-splicing factor CWC22	1452800			106.04	901	0	15.693	1	2	0	1	0	2.4	0	0	0	164740	0	0	0	0	0	0	0	0.170227	2.44329	2.02852	0.416697	0.344526	0	0	0	0	816.5	1049.5	1001	1090.5	2	0	0	0
PBANKA_1118200	FPL domain-containing protein	1118200			164.18	1379	0.00074627	3.3717	1	2	0	0	0	1.7	0	0	0	639720	0	0	0	0	0	0	0	0.159992	2.46257	2.1435	0.331428	0.405508	0	0	0	0	816.5	1049.5	1001	1090.5	2	0	0	0
PBANKA_0712300	zinc finger protein	712300			26.187	226	0	7.7438	1	2	0	1	0	13.7	0	0	0	106570	0	0	0	0	0	0	0	0.143767	2.06108	2.30633	0.317598	0.310291	0	0	0	0	816.5	1049.5	1001	1090.5	2	0	0	0
PBANKA_1329200	dynein beta chain	DHC6			766.29	6471	0	9.6121	1	2	0	0	0	0.3	0	0	0	78653	0	0	0	0	0	0	0	0.114254	2.17922	2.30569	0.296699	0.21572	0	0	0	0	816.5	1049.5	1001	1090.5	2	0	0	0
PBANKA_1351200	zinc finger protein	1351200			65.368	546	0.0028129	2.5804	1	2	0	1	0	4.4	0	0	0	97161	0	0	0	0	0	0	0	0.105697	2.42181	2.17888	0.115132	0.371146	0	0	0	0	816.5	1049.5	1001	1090.5	2	0	0	0
PBANKA_1239700	S-adenosyl-L-methionine-dependent tRNA 4-demethylwyosine synthase	1239700			103.92	889	0	9.325	1	2	0	0	0	3.3	0	0	0	125860	0	0	0	0	0	0	0	0.0900436	2.38619	2.2646	0.0165435	0.40223	0	0	0	0	816.5	1049.5	1001	1090.5	2	0	0	0
PBANKA_0511200	U3 small nucleolar ribonucleoprotein protein MPP10	511200			80.301	677	0.0028249	2.6826	1	2	0	0	0	3.4	0	0	0	89999	0	0	0	0	0	0	0	0.0712378	2.14135	2.49792	0.198593	0.131898	0	0	0	0	816.5	1049.5	1001	1090.5	2	0	0	0
PBANKA_1458000	translation machinery-associated protein 46	1458000			39.107	333	0	6.9129	1	2	0	1	0	5.4	0	0	0	192160	0	0	0	0	0	0	0	0.0647008	2.35887	2.03705	0.24089	0.0435299	0	0	0	0	816.5	1049.5	1001	1090.5	2	0	0	0
PBANKA_1357700	aspartate carbamoyltransferase	1357700			42.866	372	0	9.2255	1	2	0	0	1	5.6	0	0	0	54173	0	0	0	2282.2	0	0	0	0.0451299	7.79578	2.16024	0.353046	0.0962682	0	0	0	0	816.5	1049.5	1001	955	2	0	0	1
PBANKA_1233500	mRNA-binding protein PUF1	PUF1			137.25	1183	0.00075358	3.5451	1	2	0	0	1	2.4	0	0	0	97267	0	0	0	2315.6	0	0	0	0.0380295	7.81674	2.36495	0.374098	0.013107	0	0	0	0	816.5	1049.5	1001	955	2	0	0	1
PBANKA_1316300	conserved Plasmodium protein, unknown function	1316300			380.84	3209	0	5.7104	1	2	0	0	1	1	0	0	0	547500	0	0	0	3791.7	0	0	0	0.0333979	8.5282	2.10078	0.193055	0.161931	0	0	0	0	816.5	1049.5	1001	955	2	0	0	1
PBANKA_0935100	RNA transcription, translation and transport factor protein	935100			33.542	277	0	7.5965	1	2	0	0	0	10.1	0	0	0	169060	0	0	0	0	0	0	0	0.0326682	2.12814	2.10038	0.0545926	0.0835457	0	0	0	0	816.5	1049.5	1001	1090.5	2	0	0	0
PBANKA_0213400	60S ribosomal export protein NMD3	213400			95.684	823	0.00079554	4.4792	1	2	0	1	1	2.6	0	0	0	126020	0	0	0	1547.1	0	0	0	0.0295057	7.23492	2.29303	0.0105236	0.270605	0	0	0	0	816.5	1049.5	1001	955	2	0	0	1
PBANKA_1007800	exosome complex component RRP4	1007800			37.167	326	0	7.1837	1	2	1	1	2	6.4	0	0	7.1	170370	0	0	121460	3753.1	0	0	3839.3	0.632033	8.51344	2.30311	0.302349	6.53406	0	0	0	0	816.5	1049.5	1001	784	2	0	0	2
PBANKA_1006100	flap endonuclease 1	FEN1	DNA replication & repair		54.542	479	0	17.75	1	2	1	1	2	8.4	0	0	8.4	185820	0	0	94172	3487.9	0	0	2610.7	0.598898	8.40771	2.23167	0.394252	5.97766	124710	0	0	97705	816.5	1049.5	1001	784	2	0	0	2
PBANKA_0605700	pre-rRNA-processing protein ESF1	605700			92.278	787	0	9.1287	1	2	1	1	2	4.1	0	0	4.1	283960	0	0	157220	3834.6	0	0	1838.6	0.559241	8.54443	2.10989	0.486502	5.47183	183020	0	0	101390	816.5	1049.5	1001	784	2	0	0	2
PBANKA_0211300	cysteine desulfurase IscS	211300			61.675	541	0	19.235	1	2	1	1	2	4.8	0	0	4.8	102910	0	0	149890	4996.3	0	0	1479.9	0.486353	8.92621	2.36575	0.33316	5.15872	64859	0	0	106620	816.5	1049.5	1001	784	2	0	0	2
PBANKA_0607800	cytosolic iron-sulfur protein assembly protein 1	607800			75.474	639	0	17.32	1	2	1	1	2	3.3	0	0	3.3	281080	0	0	202110	5944.4	0	0	642.12	0.377312	9.17689	2.36282	0.399936	3.95413	252060	0	0	228390	816.5	1049.5	1001	784	2	0	0	2
PBANKA_1454800	female development protein FD1	FD1			212.74	1854	0	7.4727	1	2	1	0	0	1.8	0	0	0	258710	0	0	0	0	0	0	0	0.192454	2.0572	2.49619	0.481638	0.394682	0	0	0	0	816.5	1049.5	1001	1090.5	2	0	0	0
PBANKA_0401900	DNA-directed RNA polymerases I, II, and III subunit RPABC2	401900			17.756	152	0	6.3195	1	2	1	0	0	24.3	0	0	0	165890	0	0	0	0	0	0	0	0.176566	2.12408	2.11976	0.302311	0.447007	0	0	0	0	816.5	1049.5	1001	1090.5	2	0	0	0
PBANKA_1205200	transmembrane protein 147	1205200			31.438	271	0.0014265	2.8559	1	2	1	0	0	10.3	0	0	0	120050	0	0	0	0	0	0	0	0.191806	2.04633	2.0766	0.364151	0.426652	0	0	0	0	816.5	1049.5	1001	1090.5	2	0	0	0
PBANKA_0502700	pre-mRNA-splicing factor RDS3	502700			12.638	111	0	13.703	1	2	1	0	0	26.1	0	0	0	79440	0	0	0	0	0	0	0	0.166815	2.03601	2.03254	0.238415	0.440281	0	0	0	0	816.5	1049.5	1001	1090.5	2	0	0	0
PBANKA_1142500	signal recognition particle receptor subunit alpha	1142500			61.858	546	0	9.036	1	2	1	1	0	5.1	0	0	0	145220	0	0	0	0	0	0	0	0.152641	2.22047	2.10375	0.302616	0.357436	0	0	0	0	816.5	1049.5	1001	1090.5	2	0	0	0
PBANKA_0928300	protein transport protein SEC16	928300			159.14	1331	0	5.7302	1	2	1	1	0	1.5	0	0	0	212660	0	0	0	0	0	0	0	0.117713	2.40537	2.21272	0.287201	0.256407	0	0	0	0	816.5	1049.5	1001	1090.5	2	0	0	0
PBANKA_0622200	bromodomain protein 6	622200			376.33	3152	0	8.3361	1	2	1	0	1	1	0	0	0	80160	0	0	0	135.39	0	0	0	0.100771	3.72055	2.40414	0.188648	0.428546	0	0	0	0	816.5	1049.5	1001	955	2	0	0	1
PBANKA_1306900	serine/threonine protein kinase	SRPK2			156.12	1325	0.00080321	4.6507	1	2	1	0	1	2.5	0	0	0	224170	0	0	0	269.51	0	0	0	0.0938477	4.71377	2.48746	0.37491	0.300909	0	0	0	0	816.5	1049.5	1001	955	2	0	0	1
PBANKA_1442400	protein KIC2	1442400			92.78	785	0.00077399	3.9279	1	2	1	1	0	4.8	0	0	0	87380	0	0	0	0	0	0	0	0.103115	2.26939	2.19735	0.253956	0.206634	0	0	0	0	816.5	1049.5	1001	1090.5	2	0	0	0
PBANKA_1453700	AP2 domain transcription factor	1453700			171.65	1485	0	6.2101	1	2	1	0	0	2	0	0	0	106430	0	0	0	0	0	0	0	0.0865985	2.47759	2.19692	0.0355537	0.369252	0	0	0	0	816.5	1049.5	1001	1090.5	2	0	0	0
PBANKA_1431500	radial spoke protein 9	RSPH9			42.169	359	0.0014695	3.1293	1	2	1	0	0	7.8	0	0	0	66351	0	0	0	0	0	0	0	0.0795605	2.07075	2.01841	0.321533	0.00380164	0	0	0	0	816.5	1049.5	1001	1090.5	2	0	0	0
PBANKA_1109800	peptidyl-prolyl cis-trans isomerase	1109800			85.451	735	0	8.4133	1	2	1	0	2	4.2	0	0	4.2	105640	0	0	84708	1622.9	0	0	0	0.0723803	7.30393	2.27517	0.488905	0.204433	0	0	0	0	816.5	1049.5	1001	784	2	0	0	2
PBANKA_1029900	AAA family ATPase	1029900			120.92	1041	0	10.591	1	2	1	1	0	2.7	0	0	0	70642	0	0	0	0	0	0	0	0.0732999	2.16827	2.2118	0.139971	0.181088	0	0	0	0	816.5	1049.5	1001	1090.5	2	0	0	0
PBANKA_1219500	chloroquine resistance transporter	1219500			48.814	425	0	24.716	1	2	1	0	2	8.5	0	0	8.5	341780	0	0	441090	25947	0	0	0	0.0625368	11.3029	2.49557	0.431354	0.431555	201390	0	0	301270	816.5	1049.5	1001	784	2	0	0	2
PBANKA_1104600	MMS19-like protein	1104600			273.94	2269	0	6.9383	1	2	1	0	1	1.2	0	0	0	46025	0	0	0	124.69	0	0	0	0.0549532	3.60177	2.34902	0.0864896	0.240525	0	0	0	0	816.5	1049.5	1001	955	2	0	0	1
PBANKA_0515200	MORN repeat-containing protein 1	515200			41.213	364	0	8.9894	1	2	1	1	1	9.1	0	0	0	94204	0	0	0	4436	0	0	0	0.052416	8.75461	2.09713	0.41968	0.149124	0	0	0	0	816.5	1049.5	1001	955	2	0	0	1
PBANKA_0906600	coproporphyrinogen-III oxidase	906600			56.806	480	0	6.8504	1	2	1	1	1	4.8	0	0	0	59417	0	0	0	841.03	0	0	0	0.0490383	6.35558	2.13016	0.393368	0.0227585	0	0	0	0	816.5	1049.5	1001	955	2	0	0	1
PBANKA_0612300	apicomplexan kinetochore protein 7	AKiT7/MAD1	KT_spindle_MTOC		99.049	832	0	16.727	1	2	1	0	2	4.2	0	0	4.2	120300	0	0	139460	3099.1	0	0	0	0.0473622	8.2372	2.35897	0.140521	0.361337	71689	0	0	106280	816.5	1049.5	1001	784	2	0	0	2
PBANKA_1243300	peptidyl-prolyl cis-trans isomerase	1243300			22.701	202	0	13.631	1	2	1	1	1	18.3	0	0	0	205570	0	0	0	6724.6	0	0	0	0.04299	9.3548	2.31343	0.419113	0.0825047	0	0	0	0	816.5	1049.5	1001	955	2	0	0	1
PBANKA_0720600	trafficking protein particle complex subunit 3	720600			21.542	187	0	28.283	1	2	1	1	1	15	0	0	0	474990	0	0	0	17194	0	0	0	0.0408538	10.7092	2.48864	0.0823557	0.456826	0	0	0	0	816.5	1049.5	1001	955	2	0	0	1
PBANKA_1439800	splicing factor 3B subunit 6	1439800			12.638	109	0.00074074	3.2488	1	2	1	1	0	23.9	0	0	0	271530	0	0	0	0	0	0	0	0.0417421	2.39426	2.07502	0.0645675	0.121989	0	0	0	0	816.5	1049.5	1001	1090.5	2	0	0	0
PBANKA_0938100	tetratricopeptide repeat protein	938100			50.486	423	0	5.7135	1	2	1	0	1	4.5	0	0	0	154240	0	0	0	4117.5	0	0	0	0.0349832	8.64712	2.41747	0.324941	0.0621335	0	0	0	0	816.5	1049.5	1001	955	2	0	0	1
PBANKA_1346800	Qa-SNARE protein	1346800			33.27	281	0	7.2945	1	2	1	1	1	8.9	0	0	0	108250	0	0	0	2012.1	0	0	0	0.0344621	7.61406	2.08075	0.16349	0.170613	0	0	0	0	816.5	1049.5	1001	955	2	0	0	1
PBANKA_0707800	U5 small nuclear ribonucleoprotein 40 kDa protein	SNRNP40			36.809	322	0	17.268	1	2	1	1	1	9	0	0	0	150820	0	0	0	5304.4	0	0	0	0.0234937	9.01254	2.35072	0.0825571	0.184408	0	0	0	0	816.5	1049.5	1001	955	2	0	0	1
PBANKA_1343000	ribose-phosphate pyrophosphokinase	1343000			61.97	544	0.00078616	4.216	1	2	1	1	1	4.8	0	0	0	130200	0	0	0	1949	0	0	0	0.0178919	7.56809	2.0339	0.124065	0.0477325	0	0	0	0	816.5	1049.5	1001	955	2	0	0	1
PBANKA_1341200	WD repeat-containing protein	1341200			38.861	331	0	6.634	1	2	1	0	1	5.4	0	0	0	30366	0	0	0	3273.7	0	0	0	0.0168023	8.31628	2.10504	0.000522265	0.17458	0	0	0	0	816.5	1049.5	1001	955	2	0	0	1
PBANKA_0524300	tryptophan-rich protein IPIS2	524300			43.729	354	0	61.512	1	2	2	5	4	9	8.2	15.5	14.1	585690	247270	668820	781830	35396	25175	91920	25712	0.803095	11.7509	10.9955	8.98989	9.27759	354820	326230	372870	384800	816.5	846	349.5	416.5	2	2	6	5
PBANKA_0307100	conserved Plasmodium protein, unknown function	Timeless/Tof1	DNA replication & repair		253.96	2137	0	36.963	1	2	2	5	3	1.3	1.4	2.5	1.5	171730	109040	298470	144080	396.09	701.88	3128.1	1509.8	0.837871	5.26925	5.83084	4.11287	5.18758	101500	0	154710	104220	816.5	846	416.5	625	2	2	5	3
PBANKA_0404700	glutaredoxin 1	GRX1			12.387	109	0	37.371	1	2	2	3	2	15.6	19.3	30.3	22.9	239940	262410	394250	368040	73608	47987	252930	78850	0.862985	12.8071	11.9261	10.4502	10.8943	0	235000	164720	216970	816.5	846	499	625	2	2	4	3
PBANKA_0931300	dipeptidyl aminopeptidase 1	DPAP1			78.695	681	0	47.864	1	2	2	4	4	5	5	8.8	9.1	112600	112760	293560	428520	8651.2	2266.1	21715	7380.4	0.834403	9.71825	7.52175	6.9082	7.47692	68739	56305	127600	173300	816.5	846	499	505	2	2	4	4
PBANKA_0721700	ran-specific GTPase-activating protein 1	RANBP1			32.079	266	0	33.568	1	2	2	3	2	13.5	11.7	14.7	12.8	343480	389620	308920	88714	3719.4	34609	115940	34324	0.953101	8.50042	11.4546	9.32481	9.69436	0	292030	318110	0	816.5	846	607	784	2	2	3	2
PBANKA_1320900	thioredoxin 1	TRX1			11.638	104	0	20.462	1	2	2	3	3	21.2	27.9	37.5	21.2	514160	1309900	715100	470780	105930	128540	740730	178780	0.902388	13.3323	13.3476	12.0004	12.0753	428780	632990	430610	410120	816.5	846	607	625	2	2	3	3
PBANKA_0905000	40S ribosomal protein S21	RPS21	ribosome		9.1904	82	0	10.854	1	2	2	3	2	22	32.9	43.9	22	1099900	994950	855600	1069600	267390	274970	1005000	213900	0.850985	14.6682	14.4447	12.4406	12.334	885060	855990	735960	1143100	816.5	846	607	625	2	2	3	3
PBANKA_1302600	DNA primase small subunit	PRIM1	DNA replication & repair		52.898	447	0	15.731	1	2	2	3	2	5.4	4.9	8.5	6.7	155150	110620	218940	251750	8391.8	5171.7	24549	7298.1	0.791118	9.67433	8.71218	7.08517	7.46074	86842	77269	117990	0	816.5	846	607	784	2	2	3	2
PBANKA_0833100	M18 aspartyl aminopeptidase	M18AAP			56.368	493	0	72.945	1	2	2	2	2	5.9	5.9	5.9	5.9	155770	186900	156100	249670	9602.8	5991	28269	5486.9	0.762934	9.86881	8.92434	7.28873	7.04921	102370	122870	114760	191430	816.5	846	607	784	2	2	3	2
PBANKA_0818500	conserved protein, unknown function	818500			77.587	665	0	16.038	1	2	2	3	1	2.4	3.9	6	0	75843	171250	242610	0	608.95	1805.8	12269	0	0.478651	5.88975	7.19418	6.08453	0.178108	0	105570	146790	0	816.5	846	607	955	2	2	3	1
PBANKA_0717400	coatomer subunit zeta	717400			25.251	219	0	59.713	1	2	2	3	1	12.8	12.8	19.2	0	237980	240570	354650	0	6742.9	29748	110890	0	0.45004	9.35872	11.2363	9.26057	0.00800251	130420	152560	188000	0	816.5	846	607	955	2	2	3	1
PBANKA_1135000	YOP1-like protein	YOP1L			18.365	153	0	19.103	1	2	2	2	2	13.7	13.7	13.7	13.7	1772800	1806200	2060900	2356200	336600	253260	1142300	294410	0.866807	15.0002	14.326	12.6253	12.7949	1138700	1126000	1603200	1727000	816.5	846	763	784	2	2	2	2
PBANKA_0918100	60S ribosomal protein L38	RPL38	ribosome		9.6737	81	0	22.645	1	2	2	2	3	25.9	25.9	25.9	38.3	2067600	1583600	1325500	1327300	442440	689200	2101300	441820	0.862672	15.3947	15.7703	13.5046	13.3805	1556300	1063100	1129000	777250	816.5	846	763	505	2	2	2	4
PBANKA_0307800	conserved Plasmodium protein, unknown function	307800			32.129	282	0	48.304	1	2	2	2	2	7.8	10.6	10.6	10.6	1078100	1681400	920750	922060	92206	107810	460230	92075	0.855324	13.1321	13.0939	11.3138	11.118	0	1118800	707410	725390	816.5	846	763	625	2	2	2	3
PBANKA_1225800	peptidyl-prolyl cis-trans isomerase	1225800			23.899	210	0	12.593	1	2	2	2	2	10	10	10	10	496800	524320	506950	411470	41147	49680	193950	50695	0.848811	11.9681	11.9761	10.0671	10.257	335720	345320	398930	325750	816.5	846	763	784	2	2	2	2
PBANKA_1312700	gamete egress and sporozoite traversal protein	GEST			28.796	249	0	9.39	1	2	2	2	2	9.2	9.2	9.2	9.2	296450	199040	380580	345930	28828	24704	101830	31715	0.834765	11.4548	10.9682	9.1376	9.58031	228400	139660	325220	280830	816.5	846	763	784	2	2	2	2
PBANKA_1027900	small nuclear ribonucleoprotein-associated protein B	SMB1			21.781	194	0	9.7991	1	2	2	2	2	9.8	9.8	12.4	11.3	647880	542180	438470	441200	44120	64788	206970	43847	0.82727	12.0687	12.3592	10.1609	10.0476	413520	315570	0	0	816.5	846	763	784	2	2	2	2
PBANKA_0302000	translocation protein SEC66	SEC66			33.145	276	0	12.097	1	2	2	2	3	9.1	9.1	9.1	13	393020	386870	345880	359500	25679	28073	106090	24706	0.820691	11.2879	11.1527	9.19672	9.22001	332840	335220	295360	278190	816.5	846	763	625	2	2	2	3
PBANKA_0505800	deoxyribose-phosphate aldolase	DPA			29.26	262	0	34.771	1	2	2	2	3	11.5	11.1	11.1	19.1	226600	241070	258440	349160	7854.5	14163	45114	12371	0.819733	9.57887	10.1656	7.96308	8.22211	0	177720	223190	0	816.5	846	763	505	2	2	2	4
PBANKA_0912700	3-oxo-5-alpha-steroid 4-dehydrogenase	912700			35.158	296	0	7.6393	1	2	2	2	2	10.1	10.1	10.1	10.1	264780	316270	193350	296090	18506	16549	66906	12084	0.78847	10.8153	10.3902	8.53164	8.18824	161770	210220	161880	226650	816.5	846	763	784	2	2	2	2
PBANKA_1033100	conserved protein, unknown function	1033100			30.48	262	0	8.2675	1	2	2	2	2	11.8	11.8	11.8	11.8	266260	433660	299130	424950	20814	13120	63973	10958	0.784888	10.9848	10.0552	8.46697	8.04713	145980	227850	193280	269780	816.5	846	763	784	2	2	2	2
PBANKA_0602800	ubiquitin-conjugating enzyme E2	UBC			16.539	147	0	37.068	1	2	2	2	2	25.9	25.9	25.9	25.9	363780	466430	160320	423480	26708	32928	115690	13493	0.777436	11.3446	11.3828	9.3217	8.34736	221670	271730	116000	278800	816.5	846	763	784	2	2	2	2
PBANKA_1454500	polyadenylation factor subunit 2	1454500			54.922	481	0	13.81	1	2	2	2	2	5.2	5.2	5.4	5.4	118730	105000	52435	93516	3896.5	4947.1	15404	2184.8	0.704796	8.56753	8.64813	6.41281	5.72072	87014	62797	0	0	816.5	846	763	784	2	2	2	2
PBANKA_1109600	conserved Plasmodium protein, unknown function	RSP9	KT_spindle_MTOC		79.69	672	0	11.36	1	2	2	2	2	3.1	3.1	3.6	4.2	64800	54758	55168	156270	4464.8	1851.4	9456.9	1576.2	0.685166	8.76395	7.23016	5.70895	5.24967	39315	29960	0	0	816.5	846	763	784	2	2	2	2
PBANKA_1432500	DNA-binding chaperone	1432500			101.17	862	0	16.8	1	2	2	2	0	3.5	3.6	3.6	0	68687	257460	91684	0	0	1320.9	8035.2	0	0.615052	2.45838	6.74306	5.47391	0.185452	0	167900	68548	0	816.5	846	763	1090.5	2	2	2	0
PBANKA_0401000	pre-mRNA-splicing factor PRP46	401000			71.343	618	0.00081433	4.9619	1	2	2	2	0	5.5	5.5	5.5	0	402960	299900	257070	0	0	14391	34283	0	0.633237	2.26497	10.1886	7.567	0.319085	230970	163930	166850	0	816.5	846	763	1090.5	2	2	2	0
PBANKA_1218600	conserved protein, unknown function	1218600			32.269	279	0	5.8373	1	2	2	2	0	9.3	6.8	9.3	0	192170	114400	121680	0	0	14782	32942	0	0.605381	2.26041	10.2273	7.50944	0.0503983	137600	0	130840	0	816.5	846	763	1090.5	2	2	2	0
PBANKA_0414800	arginase	414800			39.607	354	0	10.019	1	2	2	2	1	9.6	7.1	9.3	0	740750	227520	544130	0	1403.7	34585	75199	0	0.487348	7.09459	11.4536	8.70022	0.339207	0	0	0	0	816.5	846	763	955	2	2	2	1
PBANKA_1132000	NLI interacting factor-like phosphatase	1132000			133.78	1144	0	9.3257	1	2	2	2	1	2.8	2.5	2.4	0	105880	100760	361290	0	487.64	1707.7	9647.9	0	0.455437	5.56924	7.1136	5.7378	0.0384436	0	0	0	0	816.5	846	763	955	2	2	2	1
PBANKA_0923200	ATP synthase F0 subunit b-like protein	ICAP2			59.015	493	0	21.021	1	2	2	2	1	4.9	4.9	4.9	0	337170	227830	273410	0	4672.9	10876	31718	0	0.42194	8.82967	9.78462	7.45481	0.3993	242630	190310	245290	0	816.5	846	763	955	2	2	2	1
PBANKA_1413900	zinc finger (CCCH type) protein	1413900			48.146	420	0	8.4266	1	2	2	2	1	4.8	5	4.8	0	461960	520230	310380	0	10500	30797	75584	0	0.41443	9.99767	11.2863	8.70759	0.113107	249370	0	199690	0	816.5	846	763	955	2	2	2	1
PBANKA_1340000	dihydrofolate synthase/folylpolyglutamate synthase	1340000			53.984	472	0	6.0923	1	2	2	2	1	4.2	4.7	4.2	0	271800	222290	122700	0	3516.5	10067	26360	0	0.409257	8.41949	9.6731	7.18786	0.216659	155330	0	84491	0	816.5	846	763	955	2	2	2	1
PBANKA_0417900	nucleoporin NUP138	417900			138.29	1237	0	25.218	1	2	2	2	1	1.6	1.6	1.6	0	96038	101170	57382	0	688.99	1352.6	4274.7	0	0.356711	6.06791	6.77728	4.5634	0.0186136	68718	70045	50431	0	816.5	846	763	955	2	2	2	1
PBANKA_0505900	VPS13 domain-containing protein	505900			665.08	5611	0.0007391	3.2339	1	2	2	1	2	0.6	0.6	0	0.6	17396000	20888000	0	30867000	104740	58224	0	75347	0.43738	13.316	12.2051	0.333713	10.8287	20393000	20773000	0	30371000	816.5	846	1001	625	2	2	0	3
PBANKA_1458700	conserved Plasmodium protein, unknown function	1458700			60.408	501	0	9.8802	1	2	2	1	2	7	8	0	8	138940	162340	0	137570	4913.2	1221.7	0	3325.9	0.433048	8.90202	6.63043	0.399337	6.32696	0	0	0	0	816.5	846	1001	784	2	2	0	2
PBANKA_1128200	polyadenylate-binding protein 3	PABP3			59.315	511	0	20.539	1	2	2	1	2	5.7	5.7	0	5.7	222810	215820	0	90451	6030.1	14854	0	10068	0.418252	9.19754	10.2343	0.202499	7.92492	195140	191330	0	99218	816.5	846	1001	784	2	2	0	2
PBANKA_1363000	small nuclear ribonucleoprotein E	SNRPE			10.994	94	0	22.904	1	2	2	1	2	28.7	28.7	0	28.7	377080	413090	0	289010	72252	94270	0	29084	0.386631	12.7803	12.9003	0.47354	9.45537	239760	258660	0	227340	816.5	846	1001	784	2	2	0	2
PBANKA_1036200	RNA-binding protein 8A	RBM8A			12.582	107	0	16.143	1	2	2	1	2	16.8	17.8	0	20.6	145370	103280	0	100400	14343	20768	0	9316.3	0.385352	10.4476	10.7178	0.343173	7.81298	0	0	0	0	816.5	846	1001	784	2	2	0	2
PBANKA_0617900	apoptosis-inducing factor	AIF			74.616	655	0	20.253	1	2	2	1	4	4.7	4.7	0	6.6	307130	314730	0	381870	8418.3	7678.4	0	3362.4	0.358557	9.67888	9.28235	0.455966	6.34271	183590	181120	0	208710	816.5	846	1001	505	2	2	0	4
PBANKA_0203300	DNA-directed RNA polymerase II subunit RPB9	RPB9			26.924	226	0	29.701	1	2	2	1	2	13.7	11.9	0	13.7	193370	134160	0	125430	8361.9	12891	0	3478.6	0.328893	9.66919	10.0298	0.0871412	6.39173	132290	0	0	104720	816.5	846	1001	784	2	2	0	2
PBANKA_1343300	proteasome subunit beta type-7	PMSB7			29.811	270	0	13.843	1	2	2	1	2	8.1	8.1	0	8.1	213330	235720	0	295570	17698	14523	0	3305.8	0.317645	10.7509	10.2018	0.337293	6.31822	113060	163170	0	201790	816.5	846	1001	625	2	2	0	3
PBANKA_1137100	protein arginine N-methyltransferase 5	1137100			85.796	733	0	10.876	1	2	2	1	2	4.5	4.6	0	4.6	92704	235290	0	169500	4581.2	2505.5	0	1481	0.315034	8.80108	7.66664	0.0281085	5.15979	0	162620	0	163200	816.5	846	1001	784	2	2	0	2
PBANKA_0921400	protein phosphatase	921400			34.11	288	0	63.59	1	2	2	1	2	10.8	8.7	0	10.1	195810	195950	0	129480	7616.3	11518	0	945.99	0.256807	9.53444	9.86736	0.469406	4.51312	0	0	0	0	816.5	846	1001	784	2	2	0	2
PBANKA_0804400	conserved Plasmodium protein, unknown function	804400			215.19	1809	0	12.27	1	2	2	1	3	1.6	1.6	0	2.3	87672	75967	0	100760	997.6	868.04	0	150	0.154589	6.60189	6.13738	0.113099	1.85625	65647	57407	0	61311	816.5	846	1001	625	2	2	0	3
PBANKA_1408200	vacuolar protein sorting-associated protein 18	1408200			174.83	1471	0	8.9063	1	2	2	0	0	1.9	2.2	0	0	61950	117960	0	0	0	860.42	0	0	0.0658677	2.20334	6.12465	0.389914	0.158632	0	0	0	0	816.5	846	1001	1090.5	2	2	0	0
PBANKA_0939100	AP2 domain transcription factor AP2-P	939100			177.8	1551	0	9.0794	1	2	2	1	1	1.6	1.6	0	0	112990	182450	0	0	657.64	1467.4	0	0	0.0630658	6.00072	6.8948	0.337899	0.475368	90301	122880	0	0	816.5	846	1001	955	2	2	0	1
PBANKA_0620100	U3 small nucleolar RNA-associated protein 7	620100			69.717	603	0	18.421	1	2	2	1	0	5.3	5.3	0	0	98918	104880	0	0	0	3532.8	0	0	0.0629488	2.09699	8.16235	0.453332	0.192481	60882	60272	0	0	816.5	846	1001	1090.5	2	2	0	0
PBANKA_1208500	PI31 domain-containing protein	1208500			33.83	286	0	19.918	1	2	2	1	1	7	7.7	0	0	81390	67626	0	0	1542.7	4787.6	0	0	0.0564708	7.23081	8.60084	0.495572	0.398453	0	0	0	0	816.5	846	1001	955	2	2	0	1
PBANKA_1143000	U1 small nuclear ribonucleoprotein 70 kDa homolog	SNP1			44.831	370	0	9.1689	1	2	2	1	0	5.1	7.8	0	0	63857	166940	0	0	0	2516.1	0	0	0.0555575	2.12783	7.67273	0.191782	0.352712	0	0	0	0	816.5	846	1001	1090.5	2	2	0	0
PBANKA_1020400	nucleolar GTP-binding protein 2	1020400			58.904	504	0	18.322	1	2	2	1	1	5.2	4.4	0	0	104500	99401	0	0	1831	3870.4	0	0	0.0429333	7.47799	8.29402	0.234938	0.442207	0	0	0	0	816.5	846	1001	955	2	2	0	1
PBANKA_0314900	SUZ domain-containing protein	314900			88.564	764	0	22.327	1	2	2	0	1	4.7	4.3	0	0	106080	133670	0	0	1505.4	3658	0	0	0.0417947	7.1955	8.2126	0.167235	0.476742	0	0	0	0	816.5	846	1001	955	2	2	0	1
PBANKA_1115800	conserved Plasmodium protein, unknown function	1115800			23.255	197	0	30.005	1	2	2	0	0	12.2	12.2	0	0	154290	200970	0	0	0	12857	0	0	0.0402381	2.0098	10.026	0.351894	0.132405	145270	165390	0	0	816.5	846	1001	1090.5	2	2	0	0
PBANKA_0917800	conserved oligomeric Golgi complex subunit 2	917800			112.48	944	0	18.218	1	2	2	1	1	3.4	2.4	0	0	113500	40505	0	0	716.74	1168	0	0	0.0379762	6.12488	6.56558	0.415222	0.0667127	0	0	0	0	816.5	846	1001	955	2	2	0	1
PBANKA_1107400	conserved protein, unknown function	1107400			122.16	1052	0	15.669	1	2	2	0	2	3.5	3.4	0	3	104970	153750	0	51589	781.65	362.42	0	0	0.0371908	6.24995	4.87728	0.384638	0.029192	0	0	0	0	816.5	846	1001	784	2	2	0	2
PBANKA_1425900	protein MAP1	1425900			154.42	1303	0	31.557	1	2	2	1	1	3.1	3.1	0	0	178140	275310	0	0	2974.7	1190.5	0	0	0.0364232	8.1781	6.59311	0.208288	0.329727	112370	160700	0	0	816.5	846	1001	955	2	2	0	1
PBANKA_1453500	HD superfamily phosphohydrolase protein	1453500			91.046	781	0	19.976	1	2	2	0	1	3.6	3.6	0	0	299840	260980	0	0	1674.3	3789.5	0	0	0.0313004	7.34891	8.26355	0.182828	0.305848	187770	144270	0	0	816.5	846	1001	955	2	2	0	1
PBANKA_1213700	methionine aminopeptidase 1b	1213700			55.177	481	0.00079177	4.3149	1	2	2	1	1	6.9	5	0	0	137650	81185	0	0	1726.9	1727.4	0	0	0.0244348	7.39354	7.13014	0.10713	0.247752	0	0	0	0	816.5	846	1001	955	2	2	0	1
PBANKA_1140600	DNA-directed RNA polymerases I, II, and III subunit RPABC1	RPB5			24.042	205	0	6.8621	1	2	2	0	1	9.8	8.3	0	0	110320	133000	0	0	4513.9	5315.6	0	0	0.0234478	8.77973	8.75177	0.38705	0.024026	0	0	0	0	816.5	846	1001	955	2	2	0	1
PBANKA_0305900	protein P22	305900			25.812	218	0	13.894	1	2	2	1	1	11.9	11.9	0	0	118980	110810	0	0	6123	9915	0	0	0.0194273	9.21959	9.65115	0.243072	0.123536	72217	64635	0	0	816.5	846	1001	955	2	2	0	1
PBANKA_1034300	AP2 domain transcription factor AP2-G2	1034300			161.17	1379	0	17.851	1	2	2	1	1	2	2	0	0	150010	224610	0	0	644.3	2055	0	0	0.0183416	5.97116	7.38068	0.086445	0.15845	0	0	0	0	816.5	846	1001	955	2	2	0	1
PBANKA_0309800	arginyl-tRNA--protein transferase	ATEL1			40.455	347	0	15.568	1	2	2	0	1	7.5	7.5	0	0	213390	189830	0	0	4233.3	9699.7	0	0	0.0176728	8.68714	9.61948	0.192051	0.131479	121450	102430	0	0	816.5	846	1001	955	2	2	0	1
PBANKA_1359200	DNA/RNA-binding protein Alba 2	ALBA2			23.564	202	0	27.444	1	2	3	4	4	14.9	20.8	23.8	23.8	212880	487060	1479200	1015100	65048	19353	187350	98325	0.913317	12.6288	10.616	10.0172	11.2127	208790	209750	488260	321600	816.5	676.5	416.5	416.5	2	3	5	5
PBANKA_0712100	DNA helicase	712100			120.76	1018	0	26.284	1	2	3	5	5	2.4	3.3	5.4	6	160880	346850	598490	494200	8520.6	2773.8	27593	10319	0.868904	9.69631	7.81341	7.25381	7.96045	171080	169630	305880	270140	816.5	676.5	416.5	416.5	2	3	5	5
PBANKA_1432200	male development gene 1	MDV1			24.285	214	0	110.69	1	2	3	5	3	13.6	14.5	36	27.6	204610	357550	490800	391540	22124	13235	72485	19680	0.829634	11.0729	10.0678	8.64719	8.89188	154150	270880	324990	277850	816.5	676.5	416.5	625	2	3	5	3
PBANKA_0100800	zinc finger protein	100800			157.45	1382	0	13.457	1	2	3	5	4	2.5	3.5	4.9	4.1	293680	349070	621040	582800	4588.7	5454.3	9703.7	9106.3	0.768867	8.80344	8.78894	5.74612	7.78008	299990	183160	5	243100	816.5	676.5	416.5	505	2	3	5	4
PBANKA_1415900	zinc finger protein	1415900			18.754	165	0	84.382	1	2	3	3	2	21.2	27.9	27.9	21.2	612800	792880	661340	307410	43915	87543	339200	94478	0.886272	12.062	12.7935	10.8736	11.1551	352800	342810	333470	199750	816.5	676.5	499	784	2	3	4	2
PBANKA_0916100	nucleic acid binding protein	916100			31.772	273	0	50.236	1	2	3	4	5	10.6	13.2	17.6	22	188220	151030	481640	432750	27047	11764	78353	30102	0.859077	11.3628	9.89785	8.7595	9.50501	126590	123710	182910	177690	816.5	676.5	499	416.5	2	3	4	5
PBANKA_1004000	cytosolic glyoxalase II	cGLO2			30.362	263	0	63.248	1	2	3	4	3	14.4	17.5	24	20.9	444030	581160	697150	609630	24861	26119	115830	30663	0.845909	11.2412	11.0486	9.32345	9.53165	338730	442160	462950	401420	816.5	676.5	499	625	2	3	4	3
PBANKA_0616100	prefoldin subunit 3	616100			22.329	189	0	33.102	1	2	2	2	2	17.5	17.5	17.5	17.5	263390	437550	430570	394810	16382	29265	51461	16667	0.769042	10.6394	11.2126	8.15299	8.65214	154570	153590	187440	170490	816.5	676.5	607	625	2	3	3	3
PBANKA_1145900	membrane associated histidine-rich protein 1b	MAHRP1b			31.76	278	0	48.878	1	2	3	3	2	11.5	17.3	17.3	11.5	1492900	1416100	1279000	1473700	115420	118230	437250	95090	0.839645	13.4561	13.227	11.2399	11.1644	1301200	1143100	1559400	1628100	816.5	676.5	607	784	2	3	3	2
PBANKA_1106400	transcription factor 25	1106400			102.21	860	0	14.413	1	2	3	3	2	3.5	5.5	5.3	3.8	89680	131060	99072	110290	2450.9	1992.9	9557.9	2201.6	0.751952	7.89867	7.33641	5.72427	5.73177	72097	66380	58713	77328	816.5	676.5	607	784	2	3	3	2
PBANKA_0927800	tRNA nucleotidyltransferase	927800			90.198	748	0	16.795	1	2	3	3	4	3.3	4.5	5.7	7.4	233810	95424	179750	268780	5152.7	5195.7	14605	2136.2	0.679737	8.97068	8.71886	6.33597	5.68827	88361	86717	160200	189710	816.5	676.5	607	505	2	3	3	4
PBANKA_1032300	CTP synthase	CTPS			85.871	756	0	21.206	1	2	2	2	2	4.6	4.6	4.6	4.6	93435	126770	78865	76193	607.09	785.02	3224.2	881.12	0.721281	5.88534	5.99234	4.15652	4.41063	0	59076	60685	52902	816.5	676.5	763	784	2	3	2	2
PBANKA_0205400	proteasome subunit beta type-3	PMSB3			24.509	218	0	102.12	1	2	3	2	3	11.9	19.7	15.6	19.7	875120	1356300	727310	1189700	108160	79556	377140	66119	0.832766	13.3624	12.6554	11.0265	10.6402	894420	773820	0	865910	816.5	676.5	763	625	2	3	2	3
PBANKA_0807500	conserved Plasmodium protein, unknown function	SF3B3			283.97	2412	0	14.458	1	2	3	2	1	1.2	1.8	1.4	0	40332	196660	149920	0	173	128.06	3238.2	0	0.59869	4.0742	3.37643	4.16277	0.297846	0	133170	150470	0	816.5	676.5	763	955	2	3	2	1
PBANKA_1315600	ribosome biogenesis protein TSR1	1315600			115	985	0	12.019	1	2	3	2	0	3.1	5.2	3	0	168840	108370	61237	0	0	3670.5	7357.5	0	0.556574	2.00142	8.21752	5.3468	0.340796	0	42805	45979	0	816.5	676.5	763	1090.5	2	3	2	0
PBANKA_1016800	exosome complex component RRP41	1016800			27.883	246	0	59.972	1	2	3	1	4	11.4	16.3	0	21.1	151640	186590	0	214460	17872	12637	0	10379	0.399604	10.765	10.0011	0.329411	7.96881	101780	67097	0	93522	816.5	676.5	1001	505	2	3	0	4
PBANKA_1040100	choline kinase	CK			52.181	441	0	15.021	1	2	3	1	3	7.9	9.5	0	9.5	278100	530480	0	290190	12617	12091	0	8662.8	0.381623	10.2627	9.9374	0.000751119	7.70805	232170	406090	0	164600	816.5	676.5	1001	505	2	3	0	4
PBANKA_1336300	GTPase-activating protein	1336300			72.069	607	0	46.771	1	2	3	1	2	4.6	6.1	0	3.6	192640	208000	0	341560	10674	6020.1	0	2088.7	0.298989	10.0214	8.93133	0.0108324	5.65582	176520	94589	0	257400	816.5	676.5	1001	784	2	3	0	2
PBANKA_1452200	periodic tryptophan protein 1	1452200			58.27	501	0	13.919	1	2	3	0	1	4.8	8.2	0	0	174730	224200	0	0	1407.7	7597.1	0	0	0.0514743	7.09869	9.26699	0.383046	0.459367	103110	100040	0	0	816.5	676.5	1001	955	2	3	0	1
PBANKA_1140400	exosome complex component RRP45	1140400			59.281	511	0	13.295	1	2	3	1	1	5.7	8.8	0	0	117060	527240	0	0	10818	2759.5	0	0	0.0403432	10.0407	7.80595	0.475616	0.244376	176300	241510	0	0	816.5	676.5	1001	955	2	3	0	1
PBANKA_1464500	ATP-dependent RNA helicase DRS1	1464500			76.741	650	0	6.9195	1	2	3	1	1	4.2	6.5	0	0	79234	204430	0	0	1123.7	384.38	0	0	0.037665	6.77361	4.96215	0.404249	0.0377781	55161	108830	0	0	816.5	676.5	1001	955	2	3	0	1
PBANKA_1004800	peptidyl-tRNA hydrolase 2	1004800			21.487	189	0	9.617	1	2	3	0	2	13.8	25.9	0	13.8	227290	137040	0	135620	15069	25254	0	0	0.0353466	10.5189	11	0.299598	0.461021	131700	67604	0	91032	816.5	676.5	1001	784	2	3	0	2
PBANKA_1029700	ubiquitin-conjugating enzyme E2	1029700			35.586	306	0	35.532	1	2	3	0	0	10.8	14.4	0	0	58567	131590	0	0	0	3260.9	0	0	0.029037	2.28534	8.04681	0.27115	0.0288645	0	0	0	0	816.5	676.5	1001	1090.5	2	3	0	0
PBANKA_1132600	ubiquitin-conjugating enzyme E2	1132600			22.789	202	0	40.424	1	2	3	0	3	20.3	20.3	0	25.2	75862	119360	0	218740	12062	2396.5	0	0	0.00545234	10.1978	7.60247	0.0756139	0.021439	46535	45615	0	103750	816.5	676.5	1001	625	2	3	0	3
PBANKA_1320500	V-type H(+)-translocating pyrophosphatase	VP1			76.116	716	0	117.36	1	2	3	5	6	4.3	5.7	7.8	11.6	148610	398650	737710	886760	29326	5944.4	75860	24643	0.879203	11.4795	8.91307	8.71285	9.21632	97740	143530	195970	261570	816.5	563.5	299	293	2	4	7	7
PBANKA_1334300	exported protein 2	EXP2			31.522	269	0	83.705	1	2	4	6	6	7.4	14.5	21.2	24.2	523040	1027400	1863700	2119200	111610	30767	312440	109630	0.896009	13.4077	11.2849	10.755	11.3697	317640	511640	941420	957500	816.5	563.5	349.5	350.5	2	4	6	6
PBANKA_1201900	40S ribosomal protein S20e	RPS20	ribosome		13.513	118	0	45.363	1	2	4	4	3	17.8	24.6	24.6	16.9	594770	869070	639100	525100	131280	148690	632360	151180	0.867864	13.6419	13.5577	11.7722	11.8333	466180	519160	466060	402560	816.5	563.5	349.5	625	2	4	6	3
PBANKA_1418900	ras-related protein Rab-11A	Rab11a			24.755	216	0	73.223	1	2	4	5	3	12	22.7	27.3	18.5	236090	587500	594610	627920	48302	18161	157390	45739	0.87461	12.1994	10.5243	9.76578	10.1086	215180	211610	222690	328400	816.5	563.5	416.5	625	2	4	5	3
PBANKA_0403800	transporter	403800			86.379	735	0	62.075	1	2	3	3	2	4.2	5.6	5.6	4.4	482640	716610	665230	385410	9481.6	11317	60589	19480	0.876768	9.85049	9.84196	8.38856	8.87714	243170	247150	249610	237760	816.5	563.5	499	625	2	4	4	3
PBANKA_1360100	nucleoside transporter 1	NT1			46.011	412	0	14.061	1	2	3	2	2	5.6	7.8	5.6	5.6	1565000	1824500	1562100	1450100	120840	130410	533480	130180	0.860684	13.5223	13.3685	11.5269	11.6176	1421600	1538800	1496200	2009000	816.5	563.5	499	625	2	4	4	3
PBANKA_0707400	RNA-binding protein	707400			32.906	288	0	18.887	1	2	3	3	6	8	11.5	14.2	28.8	749700	920500	706660	730910	51121	41354	197320	49060	0.84616	12.2812	11.7115	10.092	10.2097	751380	586020	516720	456010	816.5	563.5	607	293	2	4	3	7
PBANKA_1221600	cell division cycle ATPase	1221600			128.98	1122	0	17.555	1	2	4	3	2	3.4	5.3	5	4	183680	228270	203340	158390	2554.8	2962.5	12479	3279.6	0.782493	7.95856	7.90836	6.10901	6.30674	107450	75120	123500	103640	816.5	563.5	607	784	2	4	3	2
PBANKA_0924800	golgi protein 2	GP2			135.57	1192	0	16.039	1	2	4	3	4	1.7	3.9	2.7	3.8	241890	248790	170400	235230	3459.3	3557.2	13181	2505.9	0.730712	8.39583	8.17228	6.18797	5.91855	0	103970	98828	129840	816.5	563.5	607	505	2	4	3	4
PBANKA_1418300	golgi protein 1	PRP2			148.54	1272	0	31.756	1	2	4	3	4	1.7	4.4	2.5	4.4	182530	155030	162880	330470	3569.7	2684.3	9983.9	2395.3	0.718235	8.44116	7.76609	5.78718	5.85342	0	66019	0	150710	816.5	563.5	607	505	2	4	3	4
PBANKA_0925400	dynein heavy chain	DHC4A	KT_spindle_MTOC		604.54	5176	0	55.546	1	2	4	3	3	0.6	1.2	1	1	129950	322610	239010	165780	607.26	271.31	2126.1	353.57	0.642715	5.88574	4.45956	3.55579	3.09329	93136	132830	100300	116070	816.5	563.5	607	625	2	4	3	3
PBANKA_0909600	AP2 domain transcription factor AP2-G5	ApiAP2			254.12	2192	0	29.615	1	2	4	2	3	1.8	3.1	1.5	2.4	141590	322000	116270	220290	2021	1299	7340.8	1066.7	0.699465	7.62042	6.71894	5.34352	4.68637	102060	137530	80368	111390	816.5	563.5	763	625	2	4	2	3
PBANKA_0822500	tetratricopeptide repeat protein	822500			194.17	1618	0	22.27	1	2	4	2	2	1.4	3.3	1.2	1.5	97660	327420	57897	139750	1644.1	1148.9	7326.2	681.15	0.676544	7.32265	6.5418	5.34065	4.03926	82397	101170	0	86579	816.5	563.5	763	784	2	4	2	2
PBANKA_1353700	nucleolar complex protein 2	1353700			100.4	843	0	25.876	1	2	4	1	2	2.6	5.9	0	3.2	82469	170570	0	109560	1535.1	2114.6	0	536.88	0.269039	7.22369	7.42193	0.244357	3.69589	60655	65824	0	0	816.5	563.5	1001	784	2	4	0	2
PBANKA_1300600	bromodomain protein 4	1300600			75.112	634	0	21.101	1	2	4	1	4	4.1	8.8	0	8.4	109390	176820	0	430710	12149	3314.7	0	1010.9	0.258	10.2081	8.07042	0.107002	4.60886	0	231540	0	202240	816.5	563.5	1001	505	2	4	0	4
PBANKA_1006700	U4/U6 small nuclear ribonucleoprotein PRP31	1006700			58.895	516	0	46.096	1	2	4	0	1	3.7	9.5	0	0	104680	154490	0	0	1390.2	3877.1	0	0	0.0377281	7.08065	8.29652	0.490027	0.0901246	63680	63322	0	0	816.5	563.5	1001	955	2	4	0	1
PBANKA_0915200	conserved Plasmodium protein, unknown function	915200			150.38	1277	0	47.511	1	2	4	1	1	2.1	4.5	0	0	133750	322570	0	0	982.44	1883.8	0	0	0.018797	6.5798	7.25519	0.0112459	0.248811	0	0	0	0	816.5	563.5	1001	955	2	4	0	1
PBANKA_1134800	zinc finger protein	1134800			65.584	571	0	7.8642	1	2	4	0	1	3	8.6	0	0	132330	239260	0	0	1657.9	4563.2	0	0	0.0119401	7.33471	8.53159	0.0459986	0.143447	0	0	0	0	816.5	563.5	1001	955	2	4	0	1
PBANKA_1023000	myosin-specific chaperone UNC	UNC			136.2	1153	0	22.009	1	2	5	6	1	1.9	4.4	5.3	0	109010	200400	346830	0	238.42	1557.3	8887.9	0	0.51715	4.53693	6.98059	5.61942	0.336862	77078	63656	79073	0	816.5	473	349.5	955	2	5	6	1
PBANKA_1334100	proteasome subunit beta type-2	PMSB2			22.863	195	0	30.073	1	2	5	5	3	9.7	27.7	27.7	19.5	841600	1287900	1312400	892360	61808	60114	306650	93739	0.881706	12.5551	12.2512	10.728	11.1438	475050	432850	536700	621330	816.5	473	416.5	625	2	5	5	3
PBANKA_1125500	ATPase	1125500			43.109	368	0	53.027	1	2	5	4	4	7.6	17.9	13.9	13.9	347740	504510	450360	482340	20891	15807	78680	19960	0.829389	10.9902	10.324	8.76551	8.91226	220330	237750	256980	260690	816.5	473	416.5	416.5	2	5	5	5
PBANKA_0611800	N-acetyltransferase, GNAT family	611800			59.276	508	0	44.822	1	2	5	4	4	4.3	13.6	10.6	10.2	224040	479030	156280	158820	4186.6	8297.8	33537	5052.1	0.800722	8.67113	9.39427	7.53526	6.9301	228020	111870	106070	127240	816.5	473	499	505	2	5	4	4
PBANKA_1008500	translocon component PTEX150	1008500			101.95	919	0	18.73	1	2	5	4	1	4.4	7.9	7.1	0	241170	505360	468620	0	5326.4	1298.2	18940	0	0.441742	9.01852	6.71805	6.71094	0.240554	235680	200180	245080	0	816.5	473	499	955	2	5	4	1
PBANKA_0917400	armadillo repeat protein PF16	PF16			57.749	509	0	49.089	1	2	4	3	3	5.3	11	7.9	7.9	191510	578650	188850	225000	8035.9	6839.7	41213	6744.7	0.810559	9.61181	9.11548	7.83261	7.34697	121940	165420	126510	150360	816.5	473	607	625	2	5	3	3
PBANKA_0926600	protein GCN20	GCN20			90.13	773	0	29.186	1	2	5	3	2	3.6	7.1	4.7	3.5	147970	403400	195770	191020	3208	3999.1	17556	5291.2	0.817782	8.28703	8.34122	6.60147	6.99681	0	140590	146870	151380	816.5	473	607	784	2	5	3	2
PBANKA_1434800	phospholipid-transporting ATPase 2	1434800			172.97	1515	0	20.943	1	2	5	2	3	2.2	5	1.9	3.1	191610	466590	176480	267060	3609	2589.4	14888	2384.8	0.755096	8.45695	7.71416	6.36366	5.84709	113730	129150	0	150510	816.5	473	763	625	2	5	2	3
PBANKA_1111000	RNA pseudouridylate synthase	1111000			1131.6	9556	0	14.298	1	2	4	1	0	0.2	0.6	0	0	407460	372690	0	0	0	806.85	0	0	0.0304316	2.41746	6.03191	0.114102	0.143026	0	0	0	0	816.5	473	1001	1090.5	2	5	0	0
PBANKA_1334200	RNA 3-terminal phosphate cyclase-like protein	1334200			56.989	494	0	28.356	1	2	5	0	1	4.5	16.8	0	0	141580	289010	0	0	1700.3	4424.4	0	0	0.0245578	7.37114	8.48702	0.385258	0.00418475	0	0	0	0	816.5	473	1001	955	2	5	0	1
PBANKA_0520200	ADP,ATP carrier protein 1	AAC1			33.805	301	0	64.459	1	2	5	5	3	8.3	20.3	20.3	13.6	319860	2661400	2105500	1797000	89852	15993	344190	105280	0.947525	13.0948	10.3409	10.8946	11.3113	437570	865110	820430	750720	816.5	396.5	416.5	625	2	6	5	3
PBANKA_1425000	RNA-binding protein	PPIL4			102.29	843	0	21.643	1	2	5	4	3	2.7	6.5	5	4	225590	543790	323820	304230	7372.9	4770.8	32845	7754.9	0.832451	9.48759	8.59577	7.50518	7.54833	167270	219510	0	162020	816.5	396.5	499	625	2	6	4	3
PBANKA_0503200	eukaryotic translation initiation factor subunit eIF2A	503200			246.87	2110	0	38.852	1	2	6	4	4	1.4	4.1	2.8	3.5	81871	270060	122730	167520	760.17	693.82	3852.1	664.18	0.699945	6.20975	5.81418	4.41323	4.00286	0	70609	46110	74012	816.5	396.5	499	505	2	6	4	4
PBANKA_1244000	cell cycle regulator protein	1244000			20.213	180	0	17.628	1	2	5	3	4	16.1	37.8	22.2	32.2	265650	471980	282230	226960	16532	24150	103720	25657	0.854113	10.6525	10.9355	9.16413	9.2745	156480	126410	170410	123980	816.5	396.5	607	505	2	6	3	4
PBANKA_1356700	kelch protein K13	Kelch13			85.048	738	0	25.66	1	2	6	2	0	3.9	11.4	4.1	0	126000	793690	180480	0	0	3405.3	27990	0	0.731774	2.33475	8.10932	7.27442	0.368278	153850	187150	182780	0	816.5	396.5	763	1090.5	2	6	2	0
PBANKA_0208100	heptatricopeptide repeat and RAP domain-containing protein	208100			65.718	556	0	69.545	1	2	7	5	4	5.9	16.2	11.7	10.6	204040	656730	340250	673080	21034	6376.1	58565	10633	0.816581	11	9.01422	8.33955	8.0037	187980	188450	214900	271560	816.5	336	416.5	416.5	2	7	5	5
PBANKA_1134000	U3 small nucleolar RNA-associated protein 21	1134000			145.8	1249	0	54.063	1	2	8	2	3	2.3	9.2	2.5	3.8	370570	693930	108950	243700	2628.8	4812.5	17868	1414.9	0.705729	7.99976	8.60833	6.62689	5.09392	146510	290090	97644	0	816.5	292.5	763	625	2	8	2	3
PBANKA_0938400	endoplasmic reticulum-resident calcium binding protein	ERC			39.122	342	0	88.611	1	2	10	10	8	12.6	47.1	45	32.2	242350	1787300	1528000	1243400	18243	11541	105940	30678	0.906226	10.7946	9.87024	9.19468	9.53235	74071	374220	518560	546760	816.5	220.5	187	248.5	2	10	10	8
PBANKA_1108700	structural maintenance of chromosomes protein 4	SMC4	chromatin architecture		169.62	1442	0	37.88	1	3	1	8	3	2.8	0	7.6	3.4	131730	0	540090	178780	1108.8	0	9767.6	6128.1	1.40216	6.75435	2.49156	5.75558	7.20866	77463	0	122050	87900	648.5	1049.5	221.5	625	3	0	9	3
PBANKA_0510200	conserved Plasmodium protein, unknown function	510200			36.775	310	0	22.387	1	3	1	5	2	11	0	16.1	8.1	403000	0	528630	358450	23897	0	99395	35242	1.40711	11.1841	2.20157	9.10268	9.73244	241860	0	257980	265320	648.5	1049.5	416.5	784	3	0	5	2
PBANKA_1337500	protein STU2	STU2	KT_spindle_MTOC		373.28	3198	0	18.769	1	3	1	5	2	1.1	0	2	0.8	137730	0	284970	142220	785.77	0	3531.1	1574.4	1.12385	6.25753	2.22731	4.2877	5.24802	65737	0	113670	81548	648.5	1049.5	416.5	784	3	0	5	2
PBANKA_0812000	DNA primase large subunit	PRIM2	DNA replication & repair		63.719	537	0	23.266	1	2	0	3	4	4.7	0	8.2	11.2	207330	0	217100	284520	8368.3	0	20852	6385.4	1.17099	9.67029	2.38589	6.84969	7.268	129890	0	133960	148790	648.5	1049.5	607	505	3	0	3	4
PBANKA_1209800	proteasome subunit beta type-5	PMSB5			30.61	270	0	87.088	1	2	1	2	2	12.6	0	12.6	12.6	763180	0	804490	831700	1817.1	0	19191	5343.9	1.37926	7.46699	2.49562	6.72994	7.01111	483280	0	697630	644830	648.5	1049.5	607	625	3	0	3	3
PBANKA_1117000	histone H2A	H2A			14.221	133	0.00082713	5.5484	1	2	1	2	1	17.3	0	17.3	0	710280	0	730290	0	51390	0	345020	0	0.774237	12.2888	2.12537	10.8981	0.261839	569040	0	818620	0	648.5	1049.5	607	955	3	0	3	1
PBANKA_1402900	PUB domain-containing protein	1402900			64.177	550	0	6.4191	1	3	0	2	0	8.2	0	5.8	0	227880	0	105630	0	0	0	12352	0	1.39414	2.47611	2.08597	6.09425	0.265941	126980	0	85973	0	648.5	1049.5	607	1090.5	3	0	3	0
PBANKA_1457800	ADP-ribosylation factor GTPase-activating protein 1	ARFGAP1			33.157	296	0	75.536	1	3	1	2	3	16.9	0	12.5	15.9	760740	0	686350	720350	48024	0	177730	45756	1.36702	12.191	2.47606	9.94112	10.1091	513860	0	725420	508380	648.5	1049.5	763	625	3	0	2	3
PBANKA_1010600	calmodulin	CAM			16.935	149	0	9.2099	1	3	1	2	2	30.2	0	18.8	22.8	499690	0	283090	260990	22337	0	110750	22145	1.3907	11.0867	2.08717	9.25874	9.06213	224160	0	334400	231200	648.5	1049.5	763	784	3	0	2	2
PBANKA_0302300	aspartate aminotransferase	302300			47.426	410	0	15.319	1	3	1	2	2	11.7	0	7.1	7.6	410530	0	222250	192320	5833.7	0	35732	8889.9	1.37542	9.14977	2.0265	7.62672	7.74539	184520	0	154620	208010	648.5	1049.5	763	784	3	0	2	2
PBANKA_1230500	THO complex subunit 4	1230500			19.04	158	0	37.763	1	3	1	2	4	28.5	0	14.6	36.7	288830	0	105020	359840	51405	0	120750	15003	1.2111	12.2892	2.47745	9.38346	8.5004	173630	0	0	211790	648.5	1049.5	763	505	3	0	2	4
PBANKA_1241300	Suf domain-containing protein	1241300			141.23	1180	0	10.043	1	3	1	2	2	3.8	0	1.9	2.9	352380	0	57070	206150	3325	0	10334	920.49	0.970475	8.33871	2.28557	5.83691	4.47369	189190	0	0	143430	648.5	1049.5	763	784	3	0	2	2
PBANKA_1424400	CS domain protein	1424400			37.24	313	0	7.2584	1	2	0	1	2	9.9	0	0	8	156190	0	0	128430	6421.4	0	0	2265.4	0.529007	9.28824	2.39818	0.409214	5.77298	0	0	0	0	648.5	1049.5	1001	784	3	0	0	2
PBANKA_1320400	conserved Plasmodium protein, unknown function	1320400			78.946	694	0	23.306	1	2	0	1	4	4	0	0	8.6	229250	0	0	371390	12047	0	0	3835.4	0.525393	10.196	2.26679	0.0152406	6.5326	269350	0	0	159520	648.5	1049.5	1001	505	3	0	0	4
PBANKA_1455200	ATP-dependent RNA helicase DBP9	1455200			100.68	859	0.0007764	3.9892	1	2	0	0	1	2.7	0	0	0	120190	0	0	0	298.3	0	0	0	0.0755525	4.86019	2.45203	0.201983	0.350473	0	0	0	0	648.5	1049.5	1001	955	3	0	0	1
PBANKA_1202500	WD repeat-containing protein	1202500			303.54	2562	0.00082508	5.4521	1	2	0	0	0	0.7	0	0	0	135270	0	0	0	0	0	0	0	0.0667074	2.11926	2.28879	0.0136128	0.280437	0	0	0	0	648.5	1049.5	1001	1090.5	3	0	0	0
PBANKA_0304500	conserved Plasmodium protein, unknown function	304500			195.03	1650	0.00079051	4.303	1	2	1	1	2	1.2	0	0	1.3	134720	0	0	91820	976.81	0	0	630.85	0.487733	6.5715	2.36826	0.43163	3.92859	0	0	0	0	648.5	1049.5	1001	784	3	0	0	2
PBANKA_1030500	mini-chromosome maintenance complex-binding protein	1030500			107.17	912	0	12.635	1	2	1	1	1	4.1	0	0	0	66924	0	0	0	425.93	0	0	0	0.119783	5.37404	2.01794	0.440507	0.444927	0	0	0	0	648.5	1049.5	1001	955	3	0	0	1
PBANKA_1225000	serine/threonine protein kinase, FIKK family	1225000			139.79	1192	0.00082305	5.3059	1	2	1	0	1	2.5	0	0	0	149810	0	0	0	1198.6	0	0	0	0.0791159	6.8667	2.17067	0.329032	0.385969	0	0	0	0	648.5	1049.5	1001	955	3	0	0	1
PBANKA_1033200	DNA damage-inducible protein 1	DDI1			44.258	385	0	8.7361	1	2	1	1	1	7.8	0	0	0	133760	0	0	0	7109	0	0	0	0.0331191	9.435	2.0923	0.367891	0.0138831	0	0	0	0	648.5	1049.5	1001	955	3	0	0	1
PBANKA_0939900	U6 snRNA-associated Sm-like protein LSm4	939900			14.649	132	0	12.703	1	2	1	1	1	23.5	0	0	0	698710	0	0	0	65127	0	0	0	0.011619	12.6305	2.06502	0.129613	0.041135	0	0	0	0	648.5	1049.5	1001	955	3	0	0	1
PBANKA_1441500	U3 small nucleolar RNA-interacting protein 2	1441500			71.518	614	0	8.7891	1	3	0	0	0	7.2	0	0	0	164490	0	0	0	0	0	0	0	0.162977	2.03464	2.11443	0.300049	0.376153	0	0	0	0	648.5	1049.5	1001	1090.5	3	0	0	0
PBANKA_0514100	pre-mRNA-splicing factor ATP-dependent RNA helicase PRP22	514100			133.8	1162	0	7.5609	1	3	0	1	1	3	0	0	0	83241	0	0	0	405.66	0	0	0	0.0210051	5.3037	2.03916	0.067368	0.0868692	0	0	0	0	648.5	1049.5	1001	955	3	0	0	1
PBANKA_0826500	histone deacetylase 1	HDAC1			50.947	447	0	48.904	1	3	1	1	4	12.3	0	0	19.5	751170	0	0	428340	3124.4	0	0	13575	0.821181	8.24893	2.16858	0.198561	8.3561	433880	0	0	314160	648.5	1049.5	1001	505	3	0	0	4
PBANKA_1130800	phosphoinositide phosphatase SAC1	1130800			92.77	783	0	8.6306	1	3	1	1	2	4.6	0	0	2.9	336460	0	0	160110	3267.5	0	0	1624.9	0.531761	8.31354	2.36665	0.385741	5.29357	151250	0	0	101950	648.5	1049.5	1001	784	3	0	0	2
PBANKA_1007400	zinc finger protein	1007400			62.502	524	0	10.092	1	3	1	0	1	5.2	0	0	0	186850	0	0	0	1297.1	0	0	0	0.0694705	6.98064	2.12355	0.310662	0.321811	0	0	0	0	648.5	1049.5	1001	955	3	0	0	1
PBANKA_0204800	secreted ookinete protein	PSOP24			107.4	920	0	9.8932	1	3	1	1	1	5.3	0	0	0	314130	0	0	0	2237.2	0	0	0	0.0600746	7.76705	2.24607	0.366126	0.235409	0	0	0	0	648.5	1049.5	1001	955	3	0	0	1
PBANKA_1433500	PPPDE peptidase domain-containing protein	1433500			47.458	410	0	7.6113	1	3	1	1	1	10.2	0	0	0	366130	0	0	0	3123.3	0	0	0	0.0443486	8.24843	2.13419	0.297307	0.163148	0	0	0	0	648.5	1049.5	1001	955	3	0	0	1
PBANKA_0105500	glutaredoxin-like protein	GLP2			25.293	216	0	11.059	1	3	1	1	1	15.3	0	0	0	180560	0	0	0	7181.7	0	0	0	0.0378203	9.44968	2.2561	0.361827	0.0808887	0	0	0	0	648.5	1049.5	1001	955	3	0	0	1
PBANKA_0911800	DnaJ protein	911800			44.018	367	0.00082169	5.2374	1	3	1	0	1	10.4	0	0	0	140100	0	0	0	1232.1	0	0	0	0.023408	6.90647	2.16069	0.103429	0.108815	0	0	0	0	648.5	1049.5	1001	955	3	0	0	1
PBANKA_0616700	NIMA related kinase 4	NEK4			36.488	310	0	44.649	1	3	2	3	3	13.9	9.7	13.9	13.9	318000	245600	523860	508260	25413	14312	74610	24132	0.833194	11.2728	10.1807	8.68888	9.18609	151840	180250	226440	218620	648.5	846	499	625	3	2	4	3
PBANKA_0818600	pre-mRNA-splicing factor ATP-dependent RNA helicase PRP43	PRP43			89.702	782	0	21.14	1	3	2	3	0	4.3	2.9	5.6	0	168520	184140	356070	0	0	3745	15750	0	0.645281	2.1327	8.24651	6.44486	0.252652	0	0	0	0	648.5	846	499	1090.5	3	2	4	0
PBANKA_0417800	protein hook	417800			92.555	780	0	32.383	1	3	2	4	0	6.3	4.5	6.7	0	330280	396200	194290	0	0	8259.6	24748	0	0.618403	2.28088	9.38761	7.09682	0.119006	159550	197700	169440	0	648.5	846	499	1090.5	3	2	4	0
PBANKA_1441400	proliferating cell nuclear antigen 2	PCNA2			30.317	264	0	21.729	1	2	2	3	4	13.3	13.3	20.5	26.9	179500	121750	247220	431850	21405	13807	57363	12785	0.783736	11.0252	10.1289	8.30963	8.2696	82641	97369	144700	239870	648.5	846	607	505	3	2	3	4
PBANKA_1112400	orotate phosphoribosyltransferase	OPRT			29.63	253	0	13.289	1	3	2	3	2	12.6	9.9	12.6	9.5	401650	388670	346480	173330	12380	28689	93580	24749	0.851487	10.2353	11.184	9.01571	9.22252	180970	202310	184980	207110	648.5	846	607	784	3	2	3	2
PBANKA_1231200	phosducin-like protein 1	PhLP1			36.66	311	0	33.047	1	3	2	3	3	13.5	8	13.5	13.8	357600	324210	413030	417830	21991	18821	79614	21738	0.823377	11.0642	10.5758	8.78253	9.03537	139030	167810	205290	129200	648.5	846	607	416.5	3	2	3	5
PBANKA_0403000	60S ribosomal protein L44	RPL44	ribosome		12.066	103	0	56.855	1	2	2	2	2	19.4	19.4	19.4	19.4	581240	546790	477490	478550	239270	290620	1042000	238750	0.860601	14.5079	14.5245	12.4927	12.4926	687740	401140	487350	518410	648.5	846	763	784	3	2	2	2
PBANKA_0208000	cyclase-associated protein	C-CAP			18.469	161	0	59.536	1	2	2	2	5	21.1	24.2	16.8	54	94614	185790	68301	587950	14888	4988.3	30855	7589	0.779277	10.5014	8.66009	7.41501	7.51713	136420	114540	118190	209240	648.5	846	763	416.5	3	2	2	5
PBANKA_1227900	periodic tryptophan protein 2	1227900			126.32	1098	0	31.002	1	2	2	2	3	2.4	2.4	2.9	4.5	239070	135110	138880	301590	5913.4	4687.7	15973	2723.1	0.704835	9.16934	8.57042	6.46514	6.03847	0	0	150890	124830	648.5	846	763	625	3	2	2	3
PBANKA_0709000	protein transport protein SEC61 subunit beta	SEC61B			8.3315	79	0	11.156	1	3	2	2	2	40.5	25.3	25.3	27.8	285670	210790	177220	156090	31218	57134	165950	35443	0.824628	11.5697	12.1778	9.84218	9.74065	113900	103840	110820	120490	648.5	846	763	784	3	2	2	2
PBANKA_1330300	conserved Plasmodium protein, unknown function	1330300			123.91	1049	0	19.386	1	3	2	2	2	4.2	2.4	3.1	3.1	256080	196230	191410	209620	3381	4130.3	13763	3087.2	0.744441	8.3628	8.38779	6.2503	6.21952	145960	0	162000	199280	648.5	846	763	784	3	2	2	2
PBANKA_1001400	pre-mRNA-splicing factor CLF1	1001400			83.631	683	0	28.57	1	3	2	2	2	5.4	4	4	4	133170	178860	98644	169250	4231.2	3329.3	14498	2466.1	0.729027	8.68642	8.07676	6.32536	5.89545	0	117080	80951	130920	648.5	846	763	784	3	2	2	2
PBANKA_1021000	nucleolar RNA-associated protein	1021000			162.64	1363	0	37.693	1	3	2	2	2	2.6	1.8	1.8	1.8	272130	192680	128490	124580	1617.9	3534.2	9323.1	1668.7	0.712718	7.29948	8.16293	5.68839	5.33194	121310	100530	82891	78350	648.5	846	763	784	3	2	2	2
PBANKA_1013500	large subunit GTPase 1	1013500			93.596	808	0	53.701	1	3	2	2	2	4.5	3.1	3.1	2.6	321120	154920	78368	99159	2253.6	7298.2	14854	1781.1	0.693859	7.77759	9.20908	6.36036	5.42599	135550	0	0	152180	648.5	846	763	784	3	2	2	2
PBANKA_0715700	lysine decarboxylase-like protein	715700			40.061	347	0	40.269	1	3	2	2	1	13	8.6	8.6	0	338730	325800	266410	0	7149	16937	53696	0	0.422791	9.4431	10.4236	8.21432	0.185152	173440	168630	177220	0	648.5	846	763	955	3	2	2	1
PBANKA_0920800	CRAL/TRIO domain-containing protein	920800			35.239	299	0	24.935	1	3	2	1	5	11.7	7.7	0	21.4	150780	418690	0	585450	30813	7935.6	0	3224.1	0.31781	11.5508	9.32988	0.353981	6.28211	178180	211070	0	268850	648.5	846	1001	416.5	3	2	0	5
PBANKA_0517800	Sec1 family protein	517800			74.092	642	0	24.454	1	3	2	1	2	6.1	4	0	4.2	136410	85265	0	104050	3251.7	2623.5	0	966.48	0.300266	8.30655	7.73303	0.272116	4.54403	66473	46063	0	0	648.5	846	1001	784	3	2	0	2
PBANKA_1104700	trafficking protein particle complex subunit 8	1104700			264.03	2225	0	7.3883	1	3	2	1	0	1.4	1.2	0	0	250220	108890	0	0	0	1895.6	0	0	0.0728589	2.46176	7.2642	0.292454	0.416168	0	0	0	0	648.5	846	1001	1090.5	3	2	0	0
PBANKA_1433800	symplekin domain-containing protein	1433800			243.67	2042	0	9.5682	1	3	2	0	2	2.2	1.7	0	1.5	97572	238030	0	121810	1107.4	743.28	0	0	0.0720214	6.75253	5.91352	0.496846	0.41538	0	0	0	0	648.5	846	1001	784	3	2	0	2
PBANKA_1302400	cleavage and polyadenylation specificity factor subunit 3	1302400			108.22	937	0	7.8227	1	3	2	0	2	4.9	2.8	0	3.2	188890	71144	0	125380	2725.6	4106.2	0	0	0.0508767	8.05193	8.37935	0.462618	0.373351	75124	0	0	75224	648.5	846	1001	625	3	2	0	3
PBANKA_0213600	N6-adenosine-methyltransferase MT-A70	213600			94.701	811	0	22.511	1	3	2	1	1	5.7	3.8	0	0	233530	209750	0	0	848.81	5695.9	0	0	0.0338693	6.36887	8.85147	0.40872	0.106782	176080	155840	0	0	648.5	846	1001	955	3	2	0	1
PBANKA_1402600	DNA ligase I	1402600			102.7	898	0	60.164	1	3	3	8	7	5	5.1	13.6	12	196640	254040	617840	869010	16359	3568.2	37143	11924	0.842539	10.6374	8.17674	7.6826	8.16901	89545	121100	232720	201620	648.5	676.5	221.5	293	3	3	9	7
PBANKA_0804000	60S ribosomal protein L37	RPL37	ribosome		10.579	92	0	24.569	1	3	3	4	4	27.2	29.3	29.3	37	1203900	896350	1052500	995110	199020	240770	829570	210500	0.858907	14.2421	14.2531	12.1638	12.3109	746980	487780	309550	570960	648.5	676.5	258.5	505	3	3	8	4
PBANKA_0712900	high mobility group protein B2	HMGB2			11.478	98	0	27.632	1	2	2	3	3	26.5	26.5	27.6	27.6	710950	660820	1245500	812600	182910	177740	806720	289650	0.891156	14.1203	13.8152	12.1235	12.7714	433780	374630	908680	659840	648.5	676.5	499	505	3	3	4	4
PBANKA_0204200	tubulin-specific chaperone a	204200			19.165	165	0	35.845	1	2	3	4	4	14.5	22.4	28.5	32.7	119370	292610	353080	1798400	176940	11937	253450	35308	0.84148	14.0725	9.91891	10.4531	9.73514	482110	380890	554330	615050	648.5	676.5	499	416.5	3	3	4	5
PBANKA_0201600	early transcribed membrane protein	ETRAMP			18.672	177	0	90.315	1	3	3	3	3	40.1	46.3	46.3	36.7	466080	742500	1816600	1868400	197340	14436	514340	207720	0.973093	14.2299	10.1931	11.4742	12.2917	595740	314390	927640	1187100	648.5	676.5	499	505	3	3	4	4
PBANKA_0418200	ras-related protein RAB7	RAB7			23.718	206	0	73.524	1	3	3	4	6	18.4	17	27.7	44.7	1082000	686210	1166200	1348700	92065	90169	331670	92249	0.845792	13.1299	12.8361	10.8412	11.1207	475460	471860	527360	552350	648.5	676.5	499	350.5	3	3	4	6
PBANKA_1459900	signal recognition particle receptor subunit beta	SRPRB			30.357	261	0	18.18	1	3	3	4	2	13	13.4	18	9.6	214680	626190	198910	343480	31225	17774	120390	14460	0.807967	11.57	10.4932	9.37915	8.44721	210270	256300	136500	162760	648.5	676.5	499	784	3	3	4	2
PBANKA_0709100	60S ribosomal protein L22	RPL22	ribosome		16.025	138	0	8.1112	1	2	2	2	2	13.8	13.8	17.4	13.8	1920900	1391700	1070500	1314700	238820	350180	1010300	180740	0.837552	14.5051	14.7935	12.4481	12.091	1192300	994630	1171700	1054000	648.5	676.5	607	625	3	3	3	3
PBANKA_0719600	memo-like protein	719600			34.24	296	0	14.337	1	3	2	3	3	12.2	6.8	10.8	9.8	128480	169630	319730	254770	11451	3348.7	39854	18606	0.911426	10.1228	8.08514	7.78423	8.81091	100330	105530	91759	158520	648.5	676.5	607	625	3	3	3	3
PBANKA_1423600	40S ribosomal protein S16	RPS16	ribosome		16.36	144	0	33.577	1	3	3	3	4	24.3	24.3	24.3	29.9	3492700	2918400	2045600	2644700	377810	498960	1585900	292220	0.849419	15.1669	15.3043	13.0987	12.7841	2440000	2362500	2213300	1603900	648.5	676.5	607	505	3	3	3	4
PBANKA_0517400	pre-mRNA-splicing factor CEF1	CEF1			105.42	903	0	24.483	1	3	3	3	4	5.4	5.2	4.7	7.5	675500	753820	720220	527530	11080	13379	57018	16187	0.83889	10.0752	10.0834	8.30093	8.60998	558440	639150	631360	539820	648.5	676.5	607	505	3	3	3	4
PBANKA_1211700	Nicalin domain-containing protein	1211700			70.671	599	0	81.665	1	3	3	3	2	6	6	6.2	3.7	271040	344980	257210	136900	4720.7	9346.2	34832	8869.4	0.832794	8.84436	9.56592	7.58992	7.74205	122070	156430	189870	212630	648.5	676.5	607	784	3	3	3	2
PBANKA_0710900	U6 snRNA-associated Sm-like protein LSm3	LSM3			10.507	91	0	29.566	1	3	3	3	4	49.5	49.5	49.5	62.6	539000	493960	368080	451870	53939	69866	241490	47867	0.828044	12.3586	12.4681	10.3834	10.1742	221430	208420	179940	225710	648.5	676.5	607	505	3	3	3	4
PBANKA_1120700	nascent polypeptide-associated complex subunit alpha	1120700			20.82	185	0	112.6	1	3	3	3	4	16.2	21.1	35.1	21.1	870770	573250	688730	975830	139400	124400	431180	85483	0.822474	13.7284	13.3004	11.2197	11.0108	687340	501630	585320	639370	648.5	676.5	607	505	3	3	3	4
PBANKA_1107200	protein CAF40	CAF40			75.026	677	0	39.791	1	3	3	3	3	6.9	6.9	6.9	6.9	472470	446650	417590	545840	20898	23624	87733	20879	0.817554	10.9906	10.9037	8.92263	8.9772	321890	285600	378750	322470	648.5	676.5	607	505	3	3	3	4
PBANKA_1302200	translocation protein SEC62	SEC62			44.515	380	0	30.531	1	3	3	3	4	9.2	9.2	9.2	12.4	633820	401680	525540	566600	29821	33359	111980	27660	0.81456	11.5036	11.4015	9.27468	9.38295	296790	182080	294930	306420	648.5	676.5	607	505	3	3	3	4
PBANKA_0928800	splicing factor U2AF small subunit	U2AF1			36.469	304	0	15.478	1	3	3	3	3	9.9	12.5	9.9	9.9	474560	850360	282850	450470	30032	31638	130230	18856	0.802257	11.5138	11.3251	9.4925	8.83017	412390	606090	303580	328150	648.5	676.5	607	625	3	3	3	3
PBANKA_0711200	ubiquitin-like protein	711200			43.878	379	0	15.63	1	3	3	3	3	12.4	12.4	12.4	12.4	454170	308510	321250	330860	13234	18167	56592	12850	0.794341	10.3315	10.5248	8.29011	8.27691	257180	187860	234790	178800	648.5	676.5	607	625	3	3	3	3
PBANKA_1350700	tryptophan--tRNA ligase	cTrpRS			76.58	662	0	31.789	1	3	3	3	3	5.7	6.2	6.2	5.9	189100	240660	139890	221770	6160.2	5252.7	21984	3885.9	0.750291	9.22833	8.7346	6.92596	6.55147	93237	102140	72859	97631	648.5	676.5	607	505	3	3	3	4
PBANKA_1416900	structural maintenance of chromosomes protein 2	SMC2	chromatin architecture		143.5	1227	0	54.046	1	3	3	3	3	3.2	3.3	3.1	3.3	94239	134640	96424	223070	3049.5	1112.6	7300.8	1212.7	0.693915	8.21393	6.49548	5.33563	4.87144	0	55756	59224	0	648.5	676.5	607	625	3	3	3	3
PBANKA_1024000	thioredoxin-like protein	1024000			74.167	628	0	43.783	1	3	3	3	1	5.7	5.7	6.1	0	326950	287840	207350	0	656.02	9907.5	25569	0	0.486943	5.99717	9.65006	7.1439	0.475397	196160	163750	142670	0	648.5	676.5	607	955	3	3	3	1
PBANKA_1355500	casein kinase II beta chain	CK2beta2			40.531	344	0	19.841	1	2	3	2	2	8.1	10.8	8.1	8.1	763710	678430	512420	603750	32611	45858	152410	33022	0.823979	11.6326	11.8606	9.71939	9.63857	553820	474260	414430	585560	648.5	676.5	763	784	3	3	2	2
PBANKA_1235100	U6 snRNA-associated Sm-like protein LSm2	1235100			12.206	104	0	10.073	1	3	3	2	2	41.3	41.3	23.1	30.8	533070	564970	450990	384000	54273	80614	294440	75165	0.858342	12.3675	12.6745	10.6694	10.8252	345500	353110	447260	408360	648.5	676.5	763	784	3	3	2	2
PBANKA_0931800	pyridoxine biosynthesis protein PDX2	PDX2			25.675	226	0	10.955	1	3	3	2	3	20.8	21.7	13.7	20.8	832360	574390	329150	478820	56131	88879	255290	41144	0.809286	12.4161	12.8153	10.4636	9.95583	382190	276150	270100	351450	648.5	676.5	763	625	3	3	2	3
PBANKA_1452300	conserved protein, unknown function	1452300			23.993	210	0	7.2054	1	3	3	2	2	13.8	13.8	9	9	186410	195120	126670	125090	11371	16947	57573	11516	0.800193	10.1126	10.4245	8.3149	8.11879	76605	85060	138570	101890	648.5	676.5	763	784	3	3	2	2
PBANKA_0923500	ribosome biogenesis regulatory protein	923500			29.553	246	0	23.033	1	3	3	2	2	17.1	17.1	8.9	8.9	200040	230180	125290	136230	10479	15387	47535	9637.4	0.784043	9.99478	10.2852	8.0385	7.86186	109670	104360	105850	0	648.5	676.5	763	784	3	3	2	2
PBANKA_0939500	DNA repair protein RAD51	939500			38.369	349	0	20.3	1	3	3	2	3	16.6	16.6	12	16.6	468060	145890	223860	504820	28114	25400	65369	10271	0.733577	11.4186	11.0083	8.49811	7.95372	228470	0	201870	265410	648.5	676.5	763	625	3	3	2	3
PBANKA_0112100	AP2 domain transcription factor	112100			300.75	2578	0	23.306	1	3	3	2	4	2.1	2	1.2	2.5	232850	202150	171260	394990	2883.2	1699.6	7091.8	1250.1	0.669892	8.13303	7.10674	5.29373	4.91526	198690	0	155040	177580	648.5	676.5	763	505	3	3	2	4
PBANKA_0929800	insulinase	929800			145.69	1250	0	13.959	1	3	3	2	3	3.4	2.7	2.1	3.6	150570	202810	97532	170360	2887.4	2552.1	9978.1	1101.1	0.664536	8.13513	7.69323	5.78635	4.73216	70668	97657	0	0	648.5	676.5	763	625	3	3	2	3
PBANKA_0919800	bifunctional farnesyl/geranylgeranyl diphosphate synthase	919800			43.886	376	0	47.141	1	3	3	2	2	11.4	11.4	7.4	8.5	440290	490330	154900	254950	11589	5657	11742	2078	0.614784	10.14	8.84158	6.02119	5.64841	241220	264380	136910	179590	648.5	676.5	763	784	3	3	2	2
PBANKA_1335400	histone deacetylase	1335400			191.86	1630	0	12.624	1	3	3	2	2	3.3	3	2.3	1.7	366430	266660	74390	170020	2000.3	3337.2	8319.4	510.07	0.58308	7.60557	8.08018	5.52406	3.62199	151830	98036	62720	0	648.5	676.5	763	784	3	3	2	2
PBANKA_0925900	conserved Plasmodium protein, unknown function	925900			100	842	0	11.78	1	3	3	2	1	5.2	6.4	4.6	0	268670	305290	114090	0	1196.2	5597.2	14334	0	0.425254	6.86381	8.82625	6.30895	0.363318	124650	134560	93512	0	648.5	676.5	763	955	3	3	2	1
PBANKA_0808000	cdc2-related protein kinase 4	808000			158.07	1342	0	34.713	1	3	3	2	1	3.5	3.6	2.2	0	167350	130070	81514	0	431.81	2292.4	5622.7	0	0.421467	5.39382	7.5384	4.95884	0.49166	98171	71385	0	0	648.5	676.5	763	955	3	3	2	1
PBANKA_0407100	splicing factor 3B subunit 1	SF3B1			145.52	1269	0	68.84	1	3	3	2	1	3.5	3.5	2.4	0	600380	796590	268120	0	4480.8	10533	33693	0	0.416048	8.76911	9.73839	7.54196	0.158043	263200	337090	178240	0	648.5	676.5	763	955	3	3	2	1
PBANKA_0102200	trophozoite exported protein 1	102200			106.54	901	0	38.8	1	3	3	2	1	4.4	3.6	3.1	0	147910	164160	64307	0	1330.2	2279.1	7551.6	0	0.398172	7.017	7.53001	5.38436	0.407848	59908	0	58499	0	648.5	676.5	763	955	3	3	2	1
PBANKA_0315200	small nuclear ribonucleoprotein Sm D2	315200			11.799	101	0	8.615	1	2	2	1	2	17.8	25.7	0	25.7	122340	214490	0	139710	19958	17477	0	7710.9	0.375168	10.9242	10.4689	0.485927	7.54012	0	151410	0	140530	648.5	676.5	1001	784	3	3	0	2
PBANKA_0211900	cation transporting ATPase	211900			191.94	1650	0	35.741	1	2	3	0	1	1.4	2.8	0	0	101990	159300	0	0	521.97	1103.6	0	0	0.0402615	5.66739	6.48376	0.0468741	0.44235	0	0	0	0	648.5	676.5	1001	955	3	3	0	1
PBANKA_0824800	polyadenylate-binding protein 2	PABP2			22.913	199	0	22.619	1	3	3	1	3	21.6	18.6	0	21.6	1047400	924860	0	1241600	62403	63616	0	57866	0.438676	12.5689	12.3329	0.475938	10.4479	480170	471820	0	602840	648.5	676.5	1001	625	3	3	0	3
PBANKA_1451800	conserved Plasmodium protein, unknown function	1451800			185.76	1556	0	17.694	1	3	3	1	3	2.1	2.1	0	2.4	84064	162460	0	96792	1125.5	977.49	0	1078.9	0.372692	6.77592	6.3087	0.17375	4.70278	0	72023	0	49506	648.5	676.5	1001	625	3	3	0	3
PBANKA_1202600	RING finger E3 ubiquitin-protein ligase	1202600			111.3	977	0	10.826	1	3	3	1	3	4.8	5	0	4.8	270630	259230	0	370120	9027.3	6600.8	0	3628.3	0.342601	9.77965	9.06418	0.00341219	6.45251	159780	132150	0	248480	648.5	676.5	1001	625	3	3	0	3
PBANKA_0906300	methyltransferase	906300			62.613	534	0	34.817	1	3	3	1	4	8.6	9.2	0	10.3	625500	564520	0	324710	12489	24058	0	3649.8	0.32338	10.2479	10.93	0.38749	6.46104	251820	241680	0	201490	648.5	676.5	1001	505	3	3	0	4
PBANKA_1405400	U1 small nuclear ribonucleoprotein A	1405400			53.981	468	0	70.312	1	3	3	1	2	6.4	9.8	0	6.4	123410	122110	0	111770	2569.6	3938.4	0	1022	0.294473	7.9669	8.31915	0.171194	4.62461	63580	48473	0	64865	648.5	676.5	1001	784	3	3	0	2
PBANKA_1002800	protein transport protein Sec24B	1002800			158.42	1381	0	21.569	1	3	3	1	2	3.7	4.2	0	2.5	177480	241950	0	119990	1093.8	1658.7	0	430.75	0.255743	6.7347	7.07159	0.152719	3.37814	77232	86676	0	77230	648.5	676.5	1001	784	3	3	0	2
PBANKA_1223000	conserved Plasmodium protein, unknown function	1223000			133.45	1140	0	12.661	1	3	3	0	2	3.9	3.9	0	1.7	174130	200960	0	61979	1169.4	1992.5	0	0	0.0387071	6.83112	7.33612	0.195169	0.353204	103520	88166	0	57117	648.5	676.5	1001	784	3	3	0	2
PBANKA_1315700	rhoptry neck protein 2	RON2			236.55	2081	0	8.3262	1	3	3	0	1	2	2.3	0	0	228290	297080	0	0	719.98	2685.8	0	0	0.03303	6.13138	7.76689	0.0428967	0.416164	147980	131670	0	0	648.5	676.5	1001	955	3	3	0	1
PBANKA_1233300	ATP-dependent RNA helicase DDX23	DDX23			108.6	938	0	15.605	1	3	3	0	1	4.5	4.2	0	0	272870	187720	0	0	1594	3804.8	0	0	0.0293932	7.27801	8.26936	0.194745	0.262241	0	0	0	0	648.5	676.5	1001	955	3	3	0	1
PBANKA_1020600	actin-related protein ARP4	1020600			55.289	485	0	19.553	1	3	3	0	1	5.4	6.4	0	0	273350	190140	0	0	2300.9	9425.8	0	0	0.00673383	7.80755	9.57816	0.00598515	0.111087	121870	120420	0	0	648.5	676.5	1001	955	3	3	0	1
PBANKA_1218900	elongation factor 1-delta	EF-1delta			17.659	157	0	51.899	1	3	3	1	1	26.1	40.8	0	0	523980	539360	0	0	26339	48542	0	0	0.0023966	11.3245	11.9427	0.00463873	0.0511234	267520	256480	0	0	648.5	676.5	1001	955	3	3	0	1
PBANKA_1034100	FANCJ-like helicase	FANCJ	DNA replication & repair		124.96	1069	0	66.518	1	3	4	10	7	3.3	4.2	12.6	9.4	116690	267710	664690	443340	6278.3	1913	22438	9857.9	0.898195	9.25573	7.27738	6.95545	7.8945	71290	93778	209820	127950	648.5	563.5	140.5	293	3	4	12	7
PBANKA_0833000	profilin	PFN			19.266	174	0	42.456	1	3	4	5	4	37.4	42.5	33.3	29.3	144830	552690	677340	512380	56931	5345.8	178990	71033	0.976341	12.4365	8.75995	9.95132	10.7436	121590	193470	295330	193520	648.5	563.5	349.5	505	3	4	6	4
PBANKA_1420600	histone H2B variant	H2B.Z			13.749	123	0	65.569	1	3	4	4	4	34.1	35.8	35.8	42.3	1669200	1380000	1885300	2052200	293170	238460	998100	269330	0.864221	14.8009	14.2391	12.4306	12.6664	1254300	1055000	1463300	1520900	648.5	563.5	416.5	350.5	3	4	5	6
PBANKA_0601600	nuclear export mediator factor NEMF	NEMF			201.93	1738	0	12.803	1	3	4	4	2	2.4	2.6	3.5	1.7	311520	267500	297470	139610	1586.5	3539.9	11547	3380.3	0.799886	7.2712	8.16525	5.99703	6.35037	189170	180620	172440	136610	648.5	563.5	416.5	784	3	4	5	2
PBANKA_1237900	mitochondrial-processing peptidase subunit alpha	QCR2			61.263	534	0	55.618	1	2	4	4	5	6.2	9.9	9.9	12	286230	399310	372300	639830	22851	9131.5	59540	13296	0.808133	11.1195	9.53239	8.36337	8.32614	178550	141740	171670	227620	648.5	563.5	499	416.5	3	4	4	5
PBANKA_1407600	60S ribosomal protein L24	RPL24	ribosome		18.95	163	0	43.186	1	3	4	4	3	19	19	19	18.4	3035000	3364300	3019300	2087900	347980	505830	1917800	503220	0.887029	15.0482	15.3241	13.3728	13.5683	1802900	1636100	1908300	1454100	648.5	563.5	499	625	3	4	4	3
PBANKA_1016300	proliferation-associated protein 2g4	1016300			42.764	377	0	35.152	1	3	4	4	3	13.5	19.4	16.4	7.7	625260	1182700	1278500	933440	51858	22907	175130	53158	0.874107	12.3018	10.8593	9.91986	10.3254	359610	421750	538140	469060	648.5	563.5	499	625	3	4	4	3
PBANKA_0904100	ras-related protein Rab-6	RAB6			23.731	207	0	40.116	1	3	4	4	4	16.4	21.7	21.7	21.7	937130	859850	1180600	1173800	83843	66938	296520	84325	0.853133	12.995	12.4063	10.6796	10.9911	711350	503560	844000	852970	648.5	563.5	499	505	3	4	4	4
PBANKA_1345600	elongation factor Tu	eEF-Tu			53.73	477	0	13.854	1	2	4	3	3	5.7	14.5	8.4	10.3	355490	511590	541180	160470	5348.9	11850	52291	18039	0.89486	9.0246	9.90836	8.17607	8.76627	206220	310990	374390	0	648.5	563.5	607	625	3	4	3	3
PBANKA_0206500	ras-related protein Rab-5C	RAB5c			24.065	214	0	26.151	1	3	4	3	4	15.4	18.7	15.4	22.4	657790	866800	691370	730480	60873	54816	245540	57614	0.84576	12.5331	12.1181	10.4074	10.4416	545670	702310	758680	462970	648.5	563.5	607	505	3	4	3	4
PBANKA_0104900	RNA-binding protein	104900			66.507	566	0	50.162	1	3	4	3	2	7.4	9.2	6.9	4.6	329020	456950	380300	255850	11124	14305	61225	16535	0.841239	10.081	10.18	8.40363	8.64067	270410	290250	275420	215180	648.5	563.5	607	784	3	4	3	2
PBANKA_1103000	serine/arginine-rich splicing factor 12	SRSF12			38.141	317	0	27.571	1	3	4	3	4	12.3	13.2	12.3	15.8	1027500	2879000	929230	2600700	191260	72874	553040	67448	0.832824	14.1847	12.5289	11.5788	10.6689	1189100	1205300	1269600	1338900	648.5	563.5	607	505	3	4	3	4
PBANKA_1124800	conserved Plasmodium protein, unknown function	1124800			181.63	1523	0	11.961	1	3	4	3	2	2.6	3.2	2.6	1.6	391460	334720	276740	187110	2254.3	4716.3	14338	3334.2	0.772741	7.77803	8.5792	6.30935	6.33056	168790	139560	143760	126190	648.5	563.5	607	784	3	4	3	2
PBANKA_0109700	SWI/SNF-related matrix-associated actin-dependent regulator of chromatin	109700			94.18	802	0	15.565	1	3	3	2	2	4.5	5	3.1	2.4	318990	309860	86254	148160	3898.8	8394.6	21400	2269.8	0.704301	8.56838	9.411	6.88712	5.77578	128060	142390	94231	84412	648.5	563.5	763	784	3	4	2	2
PBANKA_0903000	ribosome assembly protein 4	903000			75.535	662	0	41.166	1	3	3	2	1	5.9	5.9	3.8	0	267090	272080	176810	0	5442.4	7028.8	24284	0	0.411118	9.0496	9.15482	7.06951	0.414644	205680	179590	163030	0	648.5	563.5	763	955	3	4	2	1
PBANKA_0830000	RNA-binding protein	830000			32.388	279	0	20.842	1	3	4	2	2	11.1	20.4	13.3	13.3	443520	524690	280080	189890	13840	36960	113500	21468	0.834404	10.3961	11.5494	9.29413	9.01733	221930	239300	279440	223370	648.5	563.5	763	784	3	4	2	2
PBANKA_0939200	pescadillo homolog	939200			74.378	619	0	13.367	1	3	4	0	2	6.1	9.4	0	5.2	213520	414710	0	148420	5708.3	8212.4	0	0	0.0429285	9.11842	9.37935	0.321159	0.472922	0	0	0	0	648.5	563.5	1001	625	3	4	0	3
PBANKA_1417500	conserved Plasmodium protein, unknown function	1417500			76.735	649	0	13.794	1	3	4	0	0	5.9	7.1	0	0	105420	233840	0	0	0	1943.8	0	0	0.0260072	2.19905	7.30042	0.0972552	0.1498	78541	74585	0	0	648.5	563.5	1001	1090.5	3	4	0	0
PBANKA_1455300	tetratricopeptide repeat protein	1455300			47.734	408	0	71.575	1	3	4	0	4	10.3	13.2	0	13.2	165280	374300	0	328960	13158	4889.1	0	0	0.0177994	10.3232	8.63111	0.140488	0.196887	178200	131850	0	188300	648.5	563.5	1001	505	3	4	0	4
PBANKA_0919900	ATP-dependent 6-phosphofructokinase	PFK11			159.65	1377	0	102.54	1	3	5	10	13	3.1	5.4	9.6	12.9	657790	818240	1355800	1988100	25909	9817.7	62942	17711	0.82069	11.3007	9.63693	8.44353	8.73979	218980	293270	484260	470160	648.5	473	187	118.5	3	5	10	13
PBANKA_0304900	serine repeat antigen 3	SERA3			123.2	1096	0	96.91	1	3	5	7	6	4.8	7.3	9.8	8.4	139580	318000	746490	1121000	18683	2326.4	37808	11808	0.862658	10.829	7.55964	7.7082	8.15491	116570	142490	343620	450770	648.5	473	299	350.5	3	5	7	6
PBANKA_0310000	protein SIS1	SIS1			38.121	334	0	29.349	1	3	4	6	4	12.3	18.3	21.9	16.5	284240	967000	1261800	1171100	65061	14509	202160	70100	0.913358	12.6291	10.2004	10.1269	10.7246	422610	481890	602010	519000	648.5	473	349.5	505	3	5	6	4
PBANKA_1320200	STAG domain-containing protein	SCC3	chromatin architecture		267.48	2275	0	28.327	1	3	5	6	3	2	3.5	3.9	1.8	144890	191660	219070	170690	1434.4	920.39	5273.6	1487.6	0.751635	7.1258	6.22186	4.86637	5.16621	103940	81299	88228	110540	648.5	473	349.5	625	3	5	6	3
PBANKA_1142800	conserved protein, unknown function	1142800			69.365	602	0	57.226	1	3	5	4	3	4	10.8	8.5	4.2	875500	748500	676420	1123900	28856	15517	69682	12012	0.770908	11.4562	10.2973	8.59029	8.17962	399550	387640	394410	348880	648.5	473	416.5	505	3	5	5	4
PBANKA_0405300	40S ribosomal protein S23	RPS23	ribosome		16.116	145	0	88.19	1	3	4	3	3	32.4	38.6	32.4	32.4	911720	1625000	1195100	451500	80124	174340	838030	262440	0.928535	12.9295	13.7873	12.1784	12.6291	613790	872480	606870	445440	648.5	473	499	625	3	5	4	3
PBANKA_0919100	parasitophorous vacuolar protein 1	PV1			44.696	388	0	25.925	1	3	5	4	3	11.9	19.8	15.2	11.1	150320	340360	303720	167370	9845.6	8842.1	49099	17866	0.868329	9.90483	9.48593	8.0852	8.75236	94617	130820	108950	117160	648.5	473	499	625	3	5	4	3
PBANKA_1229000	Plasmodium exported protein (PHIST), unknown function	PHIST			131.47	1139	0	54.914	1	3	5	4	3	9	11.4	10.4	9.6	279140	648230	732940	719100	10422	4045.5	34484	10622	0.849159	9.98691	8.35786	7.57544	8.0022	232140	529570	410510	345730	648.5	473	499	625	3	5	4	3
PBANKA_1450300	ATP synthase subunit beta, mitochondrial	ATPbeta			57.884	533	0	52.865	1	3	5	4	7	8.6	14.8	10.7	19.9	358130	447780	456050	881490	31482	12790	76552	16288	0.802994	11.5818	10.0185	8.72595	8.61896	209290	144340	263590	255440	648.5	473	499	248.5	3	5	4	8
PBANKA_0938300	heat shock protein HspJ62	HSPJ2			63.467	553	0	28.554	1	3	5	4	4	7.4	12.3	8.9	9.2	346720	685550	272180	430940	11310	10568	50107	8779.9	0.798161	10.1049	9.74317	8.11452	7.72742	194720	323300	154620	202680	648.5	473	499	416.5	3	5	4	5
PBANKA_1117400	conserved protein, unknown function	1117400			23.911	204	0	35.292	1	3	4	3	3	25.5	35.8	29.9	22.5	488500	671680	441420	600520	58729	42076	200520	41155	0.828786	12.4814	11.7365	10.1152	9.95621	467870	412570	402120	378830	648.5	473	607	505	3	5	3	4
PBANKA_0824700	thioredoxin reductase	TRXR			71.4	642	0	42.764	1	3	5	3	3	7.3	7.8	6.2	5.3	116330	351300	217040	147440	3680.6	2225.9	18788	5249.5	0.8563	8.4853	7.49593	6.69932	6.9854	0	188450	119170	137010	648.5	473	607	625	3	5	3	3
PBANKA_1412100	Maf-like protein	1412100			30.845	266	0	35.19	1	3	5	3	3	17.7	26.3	19.2	19.2	498600	798910	427380	528530	29159	38354	154810	25840	0.824592	11.4712	11.6028	9.74193	9.28475	252270	284010	208660	267780	648.5	473	607	625	3	5	3	3
PBANKA_1242000	ubiquitin carboxyl-terminal hydrolase 14	USP14			63.541	545	0	61.463	1	3	5	3	5	8.1	10.6	5.1	10.6	136470	289970	130140	169660	7376.6	5933.3	31576	5658.3	0.790378	9.48831	8.91038	7.44834	7.09359	66723	80585	75483	53372	648.5	473	607	416.5	3	5	3	5
PBANKA_1441700	parasitophorous vacuolar protein 2	1441700			52.511	458	0	28.04	1	3	4	2	3	10.5	13.8	6.8	10.7	257980	289030	86821	307110	11526	10066	34147	3067.4	0.69535	10.1322	9.67296	7.56127	6.21023	133630	131370	121590	183440	648.5	473	763	625	3	5	2	3
PBANKA_1421100	transcription elongation factor s-II	1421100			42.989	366	0	17.765	1	3	5	1	2	9.6	16.1	0	7.1	637640	768400	0	397200	19860	31882	0	8404	0.36253	10.9171	11.3362	0.403217	7.66429	394180	341140	0	308330	648.5	473	1001	784	3	5	0	2
PBANKA_0802700	mRNA cap guanine-N7 methyltransferase	802700			122.28	1030	0	51.559	1	3	5	1	4	3.7	7	0	5.6	162550	415460	0	268060	5057.7	3067	0	1466.8	0.323171	8.94384	7.95837	0.316405	5.14589	100020	103490	0	93357	648.5	473	1001	505	3	5	0	4
PBANKA_1411200	protein AAP2	AAP2			231.55	1991	0	16.915	1	3	5	1	2	2.1	3.6	0	1.2	137460	292910	0	95383	983.33	1417.1	0	282.93	0.231525	6.5811	6.84448	0.336622	2.77174	88749	82746	0	0	648.5	473	1001	784	3	5	0	2
PBANKA_1408900	conserved Plasmodium protein, unknown function	1408900			160.46	1389	0	26.877	1	3	5	1	1	3.2	5.3	0	0	179470	257640	0	0	631.96	2194.7	0	0	0.0556411	5.94326	7.47557	0.44782	0.298818	116110	127590	0	0	648.5	473	1001	955	3	5	0	1
PBANKA_0920400	conserved Plasmodium protein, unknown function	920400			226.22	1902	0	28.469	1	3	5	1	0	2.1	3.5	0	0	241710	309410	0	0	0	2571.4	0	0	0.0452434	2.33923	7.7041	0.346426	0.107968	125580	96176	0	0	648.5	473	1001	1090.5	3	5	0	0
PBANKA_1223100	proteasome subunit alpha type-6	PMSA6			29.619	260	0	45.382	1	3	6	6	5	16.5	33.1	27.7	24.6	1044400	1738500	1109000	1938900	129260	69624	374660	73932	0.836512	13.6195	12.4631	11.017	10.8013	646190	525790	527690	697530	648.5	396.5	349.5	416.5	3	6	6	5
PBANKA_1228000	1-cys peroxiredoxin	1-CysPxn			25.394	220	0	22.691	1	3	5	4	4	16.8	30.9	21.8	25.9	1827900	3478800	2411900	1605800	88240	107520	533570	141880	0.889526	13.0687	13.09	11.5271	11.7417	813110	1317900	1167600	1160100	648.5	396.5	499	505	3	6	4	4
PBANKA_1302500	Golgi to ER traffic protein 4	1302500			35.656	298	0	57.155	1	3	7	6	6	11.7	25.8	21.5	22.5	258100	782350	662150	958870	56404	15182	153080	37020	0.860736	12.4231	10.2658	9.72572	9.80345	225680	206480	270990	251770	648.5	336	349.5	350.5	3	7	6	6
PBANKA_1018300	dynein intermediate chain	DNAI2	KT_spindle_MTOC		69.652	592	0	22.433	1	2	5	2	1	6.1	12.7	6.1	0	39089000	48726000	28373000	0	1098200	1116800	4416000	0	0.447746	16.7063	16.4667	14.5761	0.276965	27575000	29754000	19319000	0	648.5	336	499	505	3	7	4	4
PBANKA_1220200	lysophospholipase	1220200			78.113	699	0	72.757	1	3	7	5	5	20.3	29	25.6	24.6	179870	1017900	497860	956050	28971	5450.5	78076	13867	0.846486	11.4619	8.78793	8.75439	8.3868	147360	239840	269440	308490	648.5	292.5	299	416.5	3	8	7	5
PBANKA_1332100	zinc finger protein	1332100			92.915	779	0	123.63	1	3	8	5	5	7.7	15.9	11.6	10.1	407810	1107800	493970	739230	12039	2231.7	37142	5606.9	0.834317	10.195	7.49969	7.68256	7.08042	232830	266790	237750	269730	648.5	292.5	416.5	416.5	3	8	5	5
PBANKA_1131100	adenylosuccinate synthetase	ADSS			50.037	439	0	13.637	1	4	1	4	3	12.1	0	12.5	7.5	212160	0	507910	340270	13087	0	45234	19535	1.35511	10.3154	2.1176	7.96692	8.88121	152350	0	184330	169430	533	1049.5	416.5	625	4	0	5	3
PBANKA_0819800	gamma-glutamylcysteine synthetase	gammaGCS			113.41	967	0	28.57	1	3	1	3	4	4.9	0	5.1	6.3	280730	0	256900	286050	4150.3	0	14817	3767	1.15327	8.65857	2.49525	6.35676	6.50663	124660	0	167280	135410	533	1049.5	607	505	4	0	3	4
PBANKA_1450500	pre-mRNA-splicing factor SYF1	1450500			110.67	915	0	11.279	1	4	1	2	2	6.3	0	2.7	2.7	495690	0	223260	195980	3768.8	0	20872	4293.4	1.268	8.51946	2.16387	6.85108	6.69534	0	0	202500	146090	533	1049.5	763	784	4	0	2	2
PBANKA_0606600	conserved Plasmodium protein, unknown function	606600			509.76	4287	0	10.919	1	4	1	0	0	1.3	0	0	0	174730	0	0	0	0	0	0	0	0.178594	2.30187	2.23688	0.455257	0.355337	0	0	0	0	533	1049.5	1001	1090.5	4	0	0	0
PBANKA_0914600	RNA (uracil-5-)methyltransferase	914600			92.422	790	0	9.8216	1	4	1	0	0	6.8	0	0	0	311790	0	0	0	0	0	0	0	0.151884	2.35318	2.05833	0.223239	0.446798	0	0	0	0	533	1049.5	1001	1090.5	4	0	0	0
PBANKA_1132400	conserved Plasmodium protein, unknown function	1132400			110.5	938	0	28.408	1	4	1	1	0	7	0	0	0	309020	0	0	0	0	0	0	0	0.0937096	2.25088	2.47279	0.0703203	0.372333	0	0	0	0	533	1049.5	1001	1090.5	4	0	0	0
PBANKA_1010300	dynein-related AAA-type ATPase	1010300			860.06	7263	0	20.26	1	4	1	1	0	0.8	0	0	0	175380	0	0	0	0	0	0	0	0.11	2.01662	2.06042	0.0563457	0.392129	0	0	0	0	533	1049.5	1001	1090.5	4	0	0	0
PBANKA_0105300	WD repeat-containing protein	EDC4-like			208.2	1778	0	51.741	1	4	2	4	3	4	1.7	4	2.8	179700	159070	216610	232100	2210.5	1711.4	7163.5	1726.7	0.719034	7.74973	7.11672	5.30824	5.38124	85098	107450	119530	166390	533	846	499	625	4	2	4	3
PBANKA_1425400	proteasome activator complex subunit 4	1425400			288.3	2434	0	15.653	1	4	2	4	5	2	1.1	1.9	2.5	368990	249850	260680	335760	2582.8	2838.4	9348.3	2005.3	0.71357	7.97429	7.84662	5.69228	5.59704	116760	145470	130840	122970	533	846	499	416.5	4	2	4	5
PBANKA_1209300	conserved Plasmodium protein, unknown function	1209300			40.162	342	0	26.153	1	3	2	2	3	14.3	10.2	10.2	14.3	202620	55046	103000	169050	6086.9	5882.7	16123	2723.6	0.69122	9.21106	8.89802	6.47863	6.03873	84428	62645	70321	94428	533	846	763	625	4	2	2	3
PBANKA_1439300	WD repeat-containing protein	1439300			65.316	551	0	10.398	1	3	2	2	0	8.5	5.6	5.6	0	229490	166580	82246	0	0	4086.6	7645.6	0	0.53112	2.12682	8.37244	5.40221	0.174155	66921	98411	61646	0	533	846	763	1090.5	4	2	2	0
PBANKA_1426300	ER membrane protein complex subunit 1	EMC1			130.58	1123	0	21.617	1	4	2	2	3	5.3	2.4	2.1	3.7	452090	197600	230110	371870	5902.8	7176.1	19868	3652.6	0.721581	9.16675	9.18474	6.77995	6.46214	190100	181350	208900	226470	533	846	763	625	4	2	2	3
PBANKA_0609100	kelch protein	609100			135.72	1169	0	23.087	1	4	2	2	1	4.5	2.1	2.6	0	150570	90677	76408	0	901.03	2840.9	6894.5	0	0.395864	6.455	7.84789	5.25303	0.40898	57935	54956	52881	0	533	846	763	955	4	2	2	1
PBANKA_1243400	nuclear GTP-binding protein	1243400			62.239	525	0	36.271	1	3	2	0	0	8.2	5.3	0	0	2135000	199970	0	0	0	79074	0	0	0.0146034	2.28052	12.6467	0.0707395	0.147249	788740	1290700	0	0	533	846	1001	1090.5	4	2	0	0
PBANKA_1113500	ras-related protein Rab-1A	RAB1a			23.689	206	0	10.385	1	3	2	0	2	20.9	14.1	0	14.1	407260	287620	0	337330	16667	21362	0	0	0.00316291	10.6643	10.7585	0.00918241	0.058576	204440	184430	0	254980	533	846	1001	784	4	2	0	2
PBANKA_0925200	calcium-dependent protein kinase 7	925200			220.93	1903	0	20.19	1	4	2	1	2	2.8	1.8	0	1.4	178790	62084	0	126000	1326.3	1606.9	0	547.88	0.288397	7.01276	7.02582	0.323537	3.72515	0	0	0	0	533	846	1001	625	4	2	0	3
PBANKA_1118700	acyl-CoA synthetase	1118700			157.94	1351	0	11.985	1	4	2	1	0	4.2	1.9	0	0	290390	80473	0	0	0	4208.6	0	0	0.0515475	2.44031	8.41488	0.391863	0.167695	0	0	0	0	533	846	1001	1090.5	4	2	0	0
PBANKA_0804900	E3 ubiquitin-protein ligase	CHIP			106.73	926	0	40.05	1	4	2	0	2	6.7	3.5	0	2.6	824410	241790	0	168740	3068.1	14989	0	0	0.0409371	8.2227	10.2474	0.468926	0.287185	352260	349160	0	0	533	846	1001	784	4	2	0	2
PBANKA_1007700	protein phosphatase PPM1	1007700			110.01	949	0	19.922	1	4	2	1	1	5.9	3	0	0	302760	232190	0	0	1332.4	6055.2	0	0	0.0354693	7.01938	8.93972	0.136583	0.429475	97826	184240	0	0	533	846	1001	955	4	2	0	1
PBANKA_1341600	translation initiation factor eIF-2B subunit gamma	1341600			54.723	474	0	13.981	1	4	2	1	1	10.3	8	0	0	471280	106840	0	0	3246.8	15709	0	0	0.0250862	8.30437	10.3151	0.0191273	0.447963	0	0	0	0	533	846	1001	955	4	2	0	1
PBANKA_0919300	spermidine synthase	919300			36.588	321	0	30.072	1	4	3	6	4	16.2	14.3	24	18.1	697730	1027700	883050	1331900	79677	40116	231570	52127	0.838586	12.9214	11.6676	10.3229	10.2972	479040	590420	587630	670530	533	676.5	349.5	505	4	3	6	4
PBANKA_0604200	zinc finger protein	604200			133.11	1165	0	49.41	1	4	2	4	3	3.5	3.4	5.5	4.6	444160	423140	307350	302410	4885.7	7330.1	25778	4747.2	0.77286	8.89392	9.21537	7.15565	6.8403	0	237660	136590	157590	533	676.5	499	625	4	3	4	3
PBANKA_0823500	glutamine synthetase	823500			64.271	553	0	43.081	1	4	3	4	6	9.4	6.7	10.7	14.1	327610	436310	573390	784230	22828	8140.3	60554	16364	0.830541	11.1181	9.36662	8.38773	8.62567	301050	313680	281770	282760	533	676.5	499	350.5	4	3	4	6
PBANKA_0941100	conserved Apicomplexan protein, unknown function	941100			30.003	261	0	32.458	1	3	3	3	2	18.8	17.2	18.8	13.8	504330	396830	480880	505870	36133	36024	134850	34348	0.825919	11.7806	11.5124	9.54279	9.69537	289480	312250	393650	372700	533	676.5	607	784	4	3	3	2
PBANKA_0307000	60S ribosomal protein L37ae	RPL37e	ribosome		10.809	96	0	66.473	1	4	3	3	4	43.8	34.4	35.4	43.8	7063000	4401700	4812700	5048900	1262200	1765700	5331600	1203200	0.871871	16.9071	17.1276	14.8479	14.8259	4958900	3913900	4056500	3953400	533	676.5	607	505	4	3	3	4
PBANKA_1317400	HSP90 co-chaperone p23	P23			28.116	255	0	23.382	1	4	3	3	4	18	18	19.6	25.5	1075400	1044000	1011400	1070900	89675	87969	345450	80428	0.842823	13.092	12.8005	10.8999	10.9228	1011000	774620	1226200	991320	533	676.5	607	505	4	3	3	4
PBANKA_1225700	GTPase-activating protein	1225700			49.975	434	0	59.05	1	4	3	3	2	16.6	12.2	11.5	8.1	540860	515740	199720	113140	4919	23515	59541	8683.4	0.811831	8.90372	10.8971	8.36339	7.71148	188800	210500	232970	173850	533	676.5	607	784	4	3	3	2
PBANKA_1341500	RNA-binding protein	1341500			59.439	510	0	23.781	1	4	3	3	3	14.3	10.8	7.6	10	299020	150050	187280	156460	6802.6	9115.6	30585	8142.8	0.79471	9.37144	9.52988	7.40233	7.61874	116630	141080	0	115270	533	676.5	607	625	4	3	3	3
PBANKA_0209200	parasite-infected erythrocyte surface protein	PIESP15			58.833	505	0	66.679	1	4	3	3	6	12.1	9.1	9.1	15.8	377720	293440	254880	705770	19557	9163.5	39666	4994.9	0.719009	10.895	9.53744	7.77741	6.91367	182490	142200	153720	192550	533	676.5	607	293	4	3	3	7
PBANKA_1463500	translation initiation factor eIF-2B subunit beta	1463500			61.605	530	0	22.669	1	4	3	3	1	10.2	8.1	7	0	286890	244490	203070	0	952.63	7134.9	18322	0	0.443317	6.53534	9.17644	6.66309	0.302211	139340	126060	110100	0	533	676.5	607	955	4	3	3	1
PBANKA_1409300	tetratricopeptide repeat protein	1409300			131.8	1114	0	28.858	1	4	3	2	2	4.7	3.6	2.5	2.3	340670	196810	61264	142330	2223.9	5322.9	11579	957.25	0.637783	7.75845	8.75375	6.00102	4.53019	101900	99802	53321	0	533	676.5	763	784	4	3	2	2
PBANKA_1428500	glycerol-3-phosphate 1-O-acyltransferase	1428500			66.563	583	0	8.597	1	2	2	1	1	5.3	5.3	0	0	142260	216240	0	0	2116.6	856.08	0	0	0.0375335	7.6871	6.11736	0.341961	0.176168	93767	104910	0	0	533	676.5	1001	784	4	3	0	2
PBANKA_1109700	KH domain-containing protein	1109700			222.32	1930	0	20.737	1	4	2	1	1	3.1	1.3	0	0	255330	148570	0	0	321.51	2775.4	0	0	0.0358625	4.96829	7.81424	0.201341	0.257072	0	0	0	0	533	676.5	1001	955	4	3	0	1
PBANKA_1234500	FoP domain-containing protein	1234500			22.501	191	0	78.926	1	4	3	1	2	28.3	22	0	14.1	576880	240950	0	325630	40704	66858	0	6127.9	0.310083	11.9525	12.4046	0.344081	7.20861	264900	245920	0	224750	533	676.5	1001	784	4	3	0	2
PBANKA_1428900	bromodomain protein 2	BDP2			113.45	990	0	35.962	1	4	3	1	2	5.2	4.9	0	2.6	372790	244120	0	184060	3756.3	7608	0	1065.4	0.285165	8.51467	9.26906	0.386677	4.68461	141880	111290	0	112270	533	676.5	1001	784	4	3	0	2
PBANKA_0613700	RNA-binding protein	613700			108.44	924	0	15.044	1	4	3	1	2	6.5	5.3	0	4.2	231110	247260	0	300780	2515.8	5903.9	0	626.49	0.238898	7.93637	8.90321	0.104362	3.91858	0	0	0	0	533	676.5	1001	784	4	3	0	2
PBANKA_1415500	U4/U6.U5 tri-snRNP-associated protein 2	1415500			74.424	642	0	18.094	1	4	3	1	1	10.7	7.9	0	0	240510	150410	0	0	2320.7	5688.5	0	0	0.0413795	7.81991	8.84959	0.197981	0.491796	87012	99596	0	0	533	676.5	1001	955	4	3	0	1
PBANKA_0803200	inositol-phosphate phosphatase	803200			295.68	2511	0	27.416	1	4	3	1	0	2	1.5	0	0	431370	210180	0	0	0	3268	0	0	0.036469	2.02115	8.04995	0.271339	0.0959441	197920	140740	0	0	533	676.5	1001	1090.5	4	3	0	0
PBANKA_0929900	heat shock protein 90	HSP90			92.216	802	0	38.592	1	4	4	5	6	6.9	7.6	9.2	9.7	297430	413070	429210	413460	8122.4	6013	31305	8563.9	0.81519	9.62726	8.92963	7.4359	7.69149	138410	201690	267660	265920	533	563.5	349.5	350.5	4	4	6	6
PBANKA_1435200	female development protein FD4	FD4			55.783	480	0	33.803	1	4	4	5	5	11.9	10	12.5	17.1	502020	316970	316660	770980	26948	20917	74267	13194	0.769608	11.3575	10.7281	8.68223	8.31503	192490	156670	228090	277030	533	563.5	416.5	416.5	4	4	5	5
PBANKA_1229200	60S ribosomal protein L19	RPL19	ribosome		21.596	180	0	13.363	1	3	4	3	3	19.4	19.4	19.4	19.4	1352100	1065500	1225700	751100	150220	270430	873800	240070	0.875511	13.8363	14.4207	12.2387	12.5005	978750	891130	1111200	719900	533	563.5	499	625	4	4	4	3
PBANKA_0930900	ubiquitin carboxyl-terminal hydrolase UCH54	UCH54			49.539	419	0	56.652	1	3	4	4	1	10.3	11.7	10.7	0	366390	319130	219360	0	4419.7	14247	41401	0	0.440024	8.7493	10.1741	7.83917	0.487594	125490	114560	111630	0	533	563.5	499	955	4	4	4	1
PBANKA_1441100	haloacid dehalogenase-like hydrolase	HAD2			32.773	288	0	47.07	1	4	4	4	6	20.8	20.5	20.8	29.5	780540	1074900	1282500	1486400	77969	41665	251880	72866	0.862349	12.8902	11.7223	10.4442	10.7804	597440	639300	989170	978580	533	563.5	499	350.5	4	4	4	6
PBANKA_0623300	tryptophan-rich protein	623300			41.911	342	0	36.7	1	4	4	4	5	12	15.5	12.9	18.1	432370	422520	497920	565120	26838	25434	101050	29289	0.831419	11.3516	11.0102	9.12651	9.46551	222920	245680	186010	235980	533	563.5	499	416.5	4	4	4	5
PBANKA_1417800	tRNA (guanine(26)-N(2))-dimethyltransferase	1417800			94.809	811	0	35.453	1	4	4	4	2	6.8	6.5	6.8	4.2	845500	249200	520620	236260	5494.5	19663	43060	12107	0.816496	9.06334	10.639	7.89586	8.19099	321440	272390	230620	256200	533	563.5	499	784	4	4	4	2
PBANKA_0715500	phosphoglucomutase-2	PGM2			34.968	298	0	15.735	1	4	2	3	1	18.1	7	12.4	0	249050	221520	277930	0	30186	18091	86568	0	0.409285	11.5212	10.5187	8.90334	0.117252	121840	166250	131260	0	533	563.5	607	955	4	4	3	1
PBANKA_1137200	protein transport protein Sec24A	SEC24A			106.43	942	0	21.071	1	4	3	2	2	5.9	4	3.1	3.1	607350	686630	422770	441090	17644	21599	78321	15309	0.803332	10.7465	10.7744	8.75891	8.52953	487240	472990	407070	532640	533	563.5	607	784	4	4	3	2
PBANKA_1010200	methionine aminopeptidase 2	METAP2			65.364	571	0	47.371	1	4	3	3	3	12.3	8.4	8.4	8.4	377950	336370	238730	200020	3049	6482	18309	2504.7	0.7292	8.21369	9.03798	6.66206	5.91786	136980	131240	146230	110460	533	563.5	607	625	4	4	3	3
PBANKA_0302500	hexose transporter	HT1			56.385	505	0	37.229	1	4	4	3	4	9.3	9.3	7.5	9.1	1164200	1263400	1498800	2015600	106080	61274	312740	78886	0.845322	13.3344	12.2787	10.7564	10.8949	546800	585110	901900	1129500	533	563.5	607	505	4	4	3	4
PBANKA_0719300	bifunctional dihydrofolate reductase-thymidylate synthase	DHFR-TS			68.883	587	0	44.383	1	4	4	3	2	10.7	8.9	8.2	3.4	522110	647510	497480	394500	12726	11109	55122	10400	0.807549	10.2751	9.8152	8.25214	7.97173	207630	225560	255880	0	533	563.5	607	784	4	4	3	2
PBANKA_0803400	40S ribosomal protein S29	RPS28	ribosome		6.4585	54	0	18.586	1	2	3	2	1	33.3	31.5	31.5	0	469070	467810	213450	0	99105	156360	482550	0	0.434759	13.2362	13.6303	11.3821	0.298337	0	260340	191690	0	533	563.5	763	784	4	4	2	2
PBANKA_1431900	glycerol-3-phosphate dehydrogenase [NAD(+)]	1431900			41.27	368	0	41.12	1	4	3	2	3	12.5	9	5.2	8.4	821610	806110	417780	499230	27735	45645	141370	23210	0.805955	11.399	11.8539	9.61091	9.12989	297780	330730	261240	324990	533	563.5	763	625	4	4	2	3
PBANKA_0822800	conserved Plasmodium protein, unknown function	822800			25.742	220	0	17.753	1	4	4	2	2	23.6	24.1	12.3	14.1	269560	288400	137160	64802	5158	29951	77103	15240	0.85365	8.97217	11.2461	8.7363	8.52301	99420	111270	105970	0	533	563.5	763	784	4	4	2	2
PBANKA_1319200	AP-1 complex subunit gamma	AP1G			121.51	1067	0	78.238	1	4	4	2	4	5.3	6.9	2.8	6.3	425910	369680	138240	283610	3729.3	9259	21510	3005.2	0.72412	8.50426	9.5524	6.89452	6.18068	150600	127660	108280	123430	533	563.5	763	505	4	4	2	4
PBANKA_1223600	YEATS domain-containing protein	1223600			26.054	221	0	13.912	1	3	3	1	1	16.7	16.7	0	0	434610	453370	0	0	13143	33432	0	0	0.0365002	10.3216	11.4047	0.299402	0.493611	262110	288830	0	0	533	563.5	1001	955	4	4	0	1
PBANKA_0832200	PUB domain-containing protein	832200			35.818	300	0	26.32	1	4	4	0	3	19	15.3	0	15.3	934030	832440	0	228580	17583	71848	0	0	0.0131242	10.7415	12.5084	0.2435	0.0616364	290950	301930	0	136640	533	563.5	1001	625	4	4	0	3
PBANKA_0613200	DNA polymerase alpha catalytic subunit A	POLA-A	DNA replication & repair		198.94	1709	0	109.56	1	4	5	7	6	2.9	3.7	5.1	4.6	273600	326900	544470	543710	6178.5	3109.1	18419	6187.1	0.807243	9.23261	7.97804	6.6707	7.22248	72282	91129	160870	156090	533	473	299	350.5	4	5	7	6
PBANKA_0906500	60S ribosomal protein L28	RPL28	ribosome		14.582	126	0	115.49	1	4	4	4	4	36.5	36.5	36.5	36.5	7842800	5633000	5404300	5570000	1114000	1568600	4890000	1080900	0.872661	16.7269	16.9568	14.7232	14.6712	2582200	1791700	2085800	2152000	533	473	349.5	416.5	4	5	6	5
PBANKA_0619100	40S ribosomal protein S5	RPS5	ribosome		21.743	194	0	112.55	1	4	4	5	4	35.6	36.1	41.2	35.6	2222000	2446000	1722600	1020000	78532	81460	318940	68851	0.839517	12.9006	12.6896	10.7847	10.6986	1089000	1132700	1063300	919810	533	473	349.5	416.5	4	5	6	5
PBANKA_1234200	40S ribosomal protein S24	RPS24	ribosome		15.272	133	0	147.64	1	3	4	4	3	24.1	33.8	33.8	24.1	3060300	3238200	2485600	2448200	351060	437930	1623800	352410	0.867782	15.0609	15.1161	13.1327	13.0543	1597400	1479100	1542400	1462100	533	473	416.5	505	4	5	5	4
PBANKA_1336400	DnaJ protein	1336400			36.058	302	0	68.776	1	3	5	5	5	12.9	15.9	15.9	15.9	572440	443460	455140	512800	25136	32246	94201	19012	0.790252	11.257	11.3526	9.02525	8.84206	257680	162010	210690	249410	533	473	416.5	416.5	4	5	5	5
PBANKA_0603200	eukaryotic translation initiation factor 5A	EIF5A			17.554	161	0	97.019	1	4	4	4	4	31.1	33.5	33.5	33.5	1180300	1043200	1628400	1241100	109980	105080	453360	146780	0.872916	13.3865	13.0569	11.2921	11.7907	526700	388360	726420	668790	533	473	416.5	416.5	4	5	5	5
PBANKA_1332000	splicing factor U2AF large subunit	1332000			80.314	697	0	36.352	1	4	5	5	6	6.5	8	8.2	9.5	336180	451740	287750	181190	4544.6	9338.3	33499	7993	0.824093	8.78951	9.5647	7.53363	7.59196	177680	183780	124730	131920	533	473	416.5	350.5	4	5	5	6
PBANKA_0107600	nucleoporin NUP637	107600			637.24	5440	0	6.349	1	3	3	2	1	0.6	0.6	0.3	0	4856100	24401000	4606200	0	67955	18256	195260	0	0.452221	12.6919	10.5318	10.0768	0.425406	9924300	12774000	0	0	533	473	607	293	4	5	3	7
PBANKA_1321200	vacuolar protein sorting-associated protein 4	VPS4			49.504	430	0	21.084	1	4	5	2	2	15.8	20	7.2	6.7	397640	463950	113130	140430	5617.3	13653	40039	4525.1	0.758129	9.09523	10.1127	7.79091	6.77117	121030	157400	107210	98462	533	473	763	784	4	5	2	2
PBANKA_0924000	bromodomain protein 7	924000			56.814	477	0	44.304	1	4	5	2	2	11.1	14.3	6.5	6.1	290340	405720	73953	120040	2538.1	6110.7	18898	958.79	0.665025	7.9491	8.95288	6.70774	4.53251	123690	149300	87579	72728	533	473	763	784	4	5	2	2
PBANKA_1130400	proteasome subunit alpha type-4	PMSA4			27.67	246	0	72.893	1	3	4	1	4	24	28.9	0	28.9	351240	1194500	0	1120300	89175	18933	0	11675	0.363444	13.0839	10.5844	0.463521	8.13857	409550	463900	0	661230	533	473	1001	505	4	5	0	4
PBANKA_1356300	CDT1-like protein	CDT1	DNA replication & repair		110.96	955	0	50.497	1	4	5	0	5	6.8	7.3	0	8.4	454380	290250	0	726350	13705	8573.2	0	0	0.0163742	10.382	9.44138	0.0961859	0.228405	172880	168890	0	252000	533	473	1001	416.5	4	5	0	5
PBANKA_0806100	CCR4 domain-containing protein 4	CCR4-4			98.427	824	0	29.518	1	4	6	7	6	6.4	11.9	13.1	11.9	309680	430250	522620	472570	6737.4	3243	21621	7688.1	0.829929	9.35755	8.03887	6.90194	7.53585	98287	119080	111400	133380	533	396.5	258.5	293	4	6	8	7
PBANKA_1016700	leucine-rich repeat protein	LRR			32.727	279	0	127.94	1	4	6	6	7	18.3	26.5	21.5	26.9	2975500	3150800	3954500	4246200	321700	228880	1093800	300850	0.872021	14.9349	14.18	12.5627	12.8261	937780	944600	1510300	1452700	533	396.5	349.5	293	4	6	6	7
PBANKA_0615200	calcium-dependent protein kinase 4	CDPK4			60.589	528	0	51.983	1	4	6	6	8	9.1	16.5	13.1	20.6	955440	2015200	1832900	3376300	135050	38217	327200	73317	0.854849	13.6827	11.5977	10.8216	10.7893	627100	728830	1266200	1330800	533	396.5	349.5	248.5	4	6	6	8
PBANKA_0924400	13 kDa ribonucleoprotein-associated protein	SNU13			15.399	141	0	71.376	1	2	4	4	3	24.1	42.6	42.6	33.3	781050	2097200	1463800	1055500	88769	28295	403830	120690	0.933676	13.0773	11.164	11.1252	11.5084	752080	859280	783010	654430	533	396.5	416.5	625	4	6	5	3
PBANKA_1030100	actin II	ACT2			42.655	376	0	45.618	1	3	5	4	5	19.1	25.3	22.3	26.3	1114200	1321500	1226800	1721900	53961	30649	153770	31686	0.816938	12.3592	11.2793	9.73221	9.57899	481660	511430	653980	687440	533	396.5	416.5	350.5	4	6	5	6
PBANKA_0404800	FAD-dependent glycerol-3-phosphate dehydrogenase	404800			71.138	627	0	101.26	1	4	6	4	6	10.2	13.7	10	13.7	416080	595390	561300	824220	8732.3	3874.7	31557	11380	0.86253	9.73172	8.29563	7.44747	8.10165	140930	173340	284690	265800	533	396.5	416.5	248.5	4	6	5	8
PBANKA_0309100	eukaryotic peptide chain release factor subunit 1	ERF1			48.366	428	0	23.658	1	4	6	5	4	11.9	17.1	11.7	11.7	362930	675820	704760	596230	22082	13442	86657	26102	0.860294	11.0702	10.0902	8.90482	9.29931	161330	216290	268300	301350	533	396.5	416.5	505	4	6	5	4
PBANKA_0825600	splicing factor 3A subunit 3	825600			69.572	576	0	37.98	1	4	6	4	3	8	13	6.9	5.4	271650	485730	154930	212660	7333.2	8668.8	35803	5342.3	0.773097	9.4798	9.45737	7.62959	7.01068	98688	128070	110310	106130	533	396.5	499	625	4	6	4	3
PBANKA_0416800	ubiquitin specific protease	416800			161.51	1386	0	99.596	1	4	6	4	5	5	5.4	3.2	4.5	776780	568440	350830	498720	5755.5	8801.4	24661	3813.9	0.731679	9.1303	9.47927	7.09174	6.52449	310220	213410	181760	230810	533	396.5	499	416.5	4	6	4	5
PBANKA_1206300	PHD finger protein PHD1	PHD1			416.77	3586	0	25.595	1	4	6	2	2	1.8	2.1	0.8	0.8	350490	555720	168570	149760	788.24	1685.3	6076.5	887.2	0.710612	6.26206	7.09455	5.07082	4.42055	180640	177050	0	0	533	396.5	763	784	4	6	2	2
PBANKA_1036400	ribosome biogenesis protein BOP1	BOP1			103.23	871	0	41.481	1	4	6	1	2	6	10.2	0	3.2	425990	631900	0	211600	5161.1	10390	0	1802.1	0.301995	8.97303	9.71867	0.201902	5.4429	188280	220720	0	167220	533	396.5	1001	784	4	6	0	2
PBANKA_1309500	conserved Plasmodium protein, unknown function	1309500			41.312	341	0	95.057	1	4	7	7	4	16.1	26.7	26.7	15	999480	1351200	923120	910540	28318	30771	134260	30624	0.839405	11.429	11.285	9.53647	9.52981	488280	531700	448470	422130	533	336	299	416.5	4	7	7	5
PBANKA_0834400	mitochondrial-processing peptidase subunit beta	QCR1			54.987	479	0	58.732	1	4	6	6	6	13.2	18.6	17.3	18.6	383730	657320	643370	1092600	39728	13002	104210	27973	0.845647	11.9174	10.0422	9.17093	9.39918	143340	132830	192410	252410	533	336	349.5	293	4	7	6	7
PBANKA_1202700	RNA-binding protein	1202700			86.672	715	0	53.272	1	4	7	5	4	6.6	11.9	8.7	5.7	740750	1201100	795290	672510	19780	21787	100280	23391	0.841384	10.9113	10.7869	9.11547	9.1411	759040	582320	405310	445230	533	336	416.5	505	4	7	5	4
PBANKA_0919000	26S proteasome regulatory subunit RPN7	RPN7	expression		46.572	393	0	66.508	1	4	7	5	6	10.9	20.6	13.7	17.6	926430	1463000	618200	1017600	67840	61762	268350	41213	0.820421	12.6894	12.2902	10.5356	9.95825	518730	525220	525850	343020	533	336	416.5	350.5	4	7	5	6
PBANKA_1015300	rRNA (adenosine-2-O-)-methyltransferase	1015300			274.94	2306	0	45.554	1	4	6	3	2	2.3	3.5	1.6	1.2	176420	445710	163140	46102	344.04	1186.6	5794	1217.4	0.847678	5.066	6.58838	5.00214	4.87702	97683	122180	93020	0	533	336	607	784	4	7	3	2
PBANKA_0416100	dynein heavy chain	DHC3	KT_spindle_MTOC		684.84	5834	0	24.309	1	4	7	1	3	1.2	1.5	0	0.8	271430	394120	0	138460	436.77	755.41	0	92.452	0.102973	5.4103	5.93687	0.0103908	1.15807	85988	104430	0	84197	533	336	1001	625	4	7	0	3
PBANKA_0404600	activator of Hsp90 ATPase	AHA1			41.217	350	0	77.823	1	4	7	5	5	17.7	25.7	18.9	20.3	853710	1962000	1117700	1174000	59473	32077	251620	56458	0.874625	12.4995	11.345	10.4427	10.4123	648150	640760	495950	547210	533	292.5	416.5	416.5	4	8	5	5
PBANKA_1200800	transformer-2 protein homolog beta	TRA2B			30.195	249	0	113.92	1	4	6	4	5	18.5	28.1	20.9	23.7	1015100	2474700	1023100	1499900	136360	87010	533830	93005	0.855709	13.6966	12.7847	11.5278	11.1325	653360	980060	694200	861160	533	255.5	499	350.5	4	9	4	6
PBANKA_1101300	skeleton-binding protein 1	SBP1			90.742	762	0	18.57	1	3	1	2	1	7.5	0	22.8	0	1224500	0	122650	0	1375.3	0	7003.8	0	0.587355	7.0651	2.15756	5.27572	0.141259	0	0	0	0	449	1049.5	763	955	5	0	2	1
PBANKA_1348300	U3 small nucleolar RNA-associated protein 4	1348300			137.82	1156	0	25.121	1	5	1	1	2	5.8	0	0	2.4	584920	0	0	328730	5388.9	0	0	728.48	0.374258	9.03535	2.25555	0.0895276	4.13618	298400	0	0	234220	449	1049.5	1001	784	5	0	0	2
PBANKA_1022300	mannose-1-phosphate guanyltransferase	1022300			47.078	414	0	152.9	1	4	2	4	4	15.7	7	13.3	16.7	473330	296930	686490	639720	21099	15736	74659	26404	0.844467	11.0045	10.3175	8.68982	9.3159	209420	203020	362500	332250	449	846	499	505	5	2	4	4
PBANKA_0706400	conserved Plasmodium protein, unknown function	DCC1			131.92	1107	0	55.035	1	5	2	4	5	5.9	2.6	4.9	5.6	241800	136060	379990	322400	4741.2	3555.9	15886	5588.1	0.795004	8.85061	8.17176	6.45726	7.07558	92711	102940	171510	148510	449	846	499	416.5	5	2	4	5
PBANKA_0417500	60S ribosomal protein L32	RPL32	ribosome		15.523	131	0	57.901	1	3	2	2	3	25.2	14.5	14.5	25.2	2399300	2092300	2057600	1801600	323310	420870	1529700	367020	0.871959	14.9421	15.0588	13.0466	13.1129	1826400	1788100	2070500	1354000	449	846	607	416.5	5	2	3	5
PBANKA_1450700	clustered-asparagine-rich protein	CARP			45.674	397	0	71.296	1	4	2	3	4	14.4	9.1	12.6	15.1	875520	647150	646930	914850	59295	53186	201670	43768	0.820867	12.4952	12.0745	10.1234	10.045	717000	412520	567810	801450	449	846	607	505	5	2	3	4
PBANKA_0923700	ethanolamine kinase	EK			51.002	434	0	44.089	1	5	3	5	3	15	10.4	15.2	9.7	407860	462620	621610	485190	9780.5	9021.8	44355	15689	0.850248	9.89526	9.51496	7.9386	8.5649	151120	169050	195280	225970	449	676.5	416.5	505	5	3	5	4
PBANKA_0517000	early transcribed membrane protein	ETRAMP10.2			32.858	313	0	56.619	1	5	3	5	2	24	19.5	30.7	8.3	547840	225700	420720	96757	6911.2	28973	68912	20264	0.85023	9.39429	11.1982	8.57426	8.93407	177450	98789	154340	0	449	676.5	416.5	784	5	3	5	2
PBANKA_0417700	alpha tubulin 1	TUBA1			50.206	453	0	154.26	1	5	3	4	3	46.8	38.2	44.8	37.7	3383600	3247100	2876200	2497700	118940	161130	571650	136960	0.858107	13.4994	13.6736	11.6266	11.6908	1961700	1973500	2129300	1768800	449	676.5	499	625	5	3	4	3
PBANKA_1220300	prodrug activation and resistance esterase	PARE			43.394	377	0	63.024	1	5	3	4	5	18.8	10.9	10.9	16.2	402600	387020	467110	491730	19026	14132	64747	18684	0.823177	10.8553	10.1624	8.48432	8.81695	266350	256510	362510	287320	449	676.5	499	416.5	5	3	4	5
PBANKA_0306500	ARMT1-like domain-containing protein	ARMT1	DNA replication & repair		55.103	454	0	26.48	1	5	3	3	0	11.5	7.5	5.7	0	425990	389080	158680	0	0	10474	25420	0	0.601853	2.38674	9.73028	7.13547	0.157195	138980	117930	117990	0	449	676.5	499	1090.5	5	3	4	0
PBANKA_1324100	ubiquitin carboxyl-terminal hydrolase isozyme L3	UCHL3			25.86	228	0	13.682	1	3	2	2	2	17.1	16.2	13.2	16.2	174850	121770	70359	52523	3092.8	13865	24143	4178.2	0.746751	8.23427	10.1349	7.06111	6.6561	50849	62000	60306	45264	449	676.5	607	784	5	3	3	2
PBANKA_1022000	40S ribosomal protein S25	RPS25	ribosome		11.796	105	0	52.265	1	4	3	3	3	39	29.5	29.5	29.5	1929900	1910000	1100400	1516400	252730	321650	1076100	183400	0.842556	14.5868	14.6709	12.5392	12.1121	635670	807520	859250	698260	449	676.5	607	625	5	3	3	3
PBANKA_1305000	conserved Plasmodium protein, unknown function	1305000			26.52	230	0	240.28	1	5	3	3	4	20.9	18.7	12.2	20.9	1585100	857560	992430	1175300	41029	62872	248810	51105	0.852358	11.9639	12.3159	10.4265	10.2686	782610	953680	634680	614450	449	676.5	607	505	5	3	3	4
PBANKA_1230300	zinc finger protein	1230300			265.46	2218	0	82.822	1	5	3	3	3	2.7	1.9	1.8	1.8	526400	296800	338740	320670	2812.9	4617.5	13005	2971.4	0.740892	8.09741	8.54865	6.16857	6.16436	188270	0	150110	149210	449	676.5	607	625	5	3	3	3
PBANKA_1018500	transcription factor BTF3	BTF3			19.936	174	0	40.003	1	5	3	2	3	35.6	22.4	21.3	22.4	778760	698250	835900	750970	120280	125050	494570	139320	0.862418	13.5156	13.3079	11.4176	11.7155	580580	768080	873090	712650	449	676.5	763	625	5	3	2	3
PBANKA_0937400	pre-mRNA-processing factor 6	PRPF6			133.1	1162	0	32.096	1	4	3	1	3	5.8	3.9	0	3.5	372100	187640	0	232890	3696.6	4914.1	0	676.31	0.252879	8.49155	8.63847	0.302846	4.02898	103210	116100	0	106110	449	676.5	1001	505	5	3	0	4
PBANKA_0613500	conserved Plasmodium protein, unknown function	613500			42.667	367	0	17.483	1	5	3	0	1	18.8	12.5	0	0	312890	132750	0	0	1250.2	10551	0	0	0.0254129	6.92751	9.74085	0.197677	0.225914	95152	64814	0	0	449	676.5	1001	955	5	3	0	1
PBANKA_0617100	60S ribosomal protein L11a	RPL11a	ribosome		20.252	173	0	60.811	1	4	3	5	2	24.9	17.3	28.9	15.6	7306400	6152300	5291000	5101800	425370	601360	1924300	422240	0.863523	15.3379	15.5736	13.3777	13.3151	3356200	2752600	2880400	2998400	449	563.5	299	625	5	4	7	3
PBANKA_1424200	conserved protein, unknown function	1424200			77.345	661	0	68.823	1	5	3	4	7	10.1	6.2	6.7	13.3	902200	818340	622840	1471200	26282	14949	61423	14638	0.782437	11.3214	10.2435	8.40829	8.46487	406460	540520	432320	520650	449	563.5	349.5	293	5	4	6	7
PBANKA_0808200	proteasome subunit alpha type-3	PMSA3			28.728	250	0	101.29	1	5	4	5	5	28.8	24.4	28.8	28.8	1716100	1721300	1612400	1721300	132410	132010	520850	124030	0.852065	13.6542	13.386	11.4923	11.5478	697990	643210	763430	719920	449	563.5	416.5	416.5	5	4	5	5
PBANKA_0920000	multiprotein-bridging factor 1	MBF1			15.625	136	0	27.311	1	5	4	5	7	36	26.5	36.8	38.2	802140	508310	1046100	866280	96253	89126	318680	76822	0.831886	13.1941	12.8193	10.7835	10.8567	406520	337610	448170	423520	449	563.5	416.5	293	5	4	5	7
PBANKA_1217600	histone H2A.Z	H2A.Z			16.493	158	0	46.794	1	4	3	3	4	31	24.7	25.3	31	5536500	5023700	5745000	5907400	984560	922750	3702100	957500	0.880209	16.5487	16.1913	14.3217	14.4963	4191700	4257300	5245000	5807500	449	563.5	499	416.5	5	4	4	5
PBANKA_1445500	pre-mRNA-splicing regulator WTAP	1445500			65.235	539	0	23.163	1	4	3	4	2	9.8	9.8	9.3	5	442610	342070	470940	230500	7929.6	15962	55489	18838	0.857496	9.5926	10.3381	8.26171	8.82879	227330	155220	162600	207800	449	563.5	499	625	5	4	4	3
PBANKA_1207200	adenylate kinase	AK1			27.399	242	0	42.48	1	4	4	4	6	23.6	23.6	23.6	30.2	761160	629940	1151700	1205300	45228	29256	150010	48145	0.852566	12.1045	11.2122	9.69649	10.1825	280400	231980	548660	547260	449	563.5	499	350.5	5	4	4	6
PBANKA_0926700	exported protein 1	EXP1			17.944	166	0	61.147	1	5	4	4	3	51.2	39.8	39.8	35.5	5867300	3690100	5222900	5198500	18788	71446	183420	51739	0.86869	10.8371	12.5003	9.98659	10.2864	3372000	1908600	3145600	2953100	449	563.5	499	505	5	4	4	4
PBANKA_1103400	60S ribosomal protein L31	RPL31	ribosome		13.982	119	0	92.136	1	4	3	2	2	32.8	26.9	18.5	20.2	1882500	1071700	872910	1127700	225540	270590	723100	98224	0.803521	14.4226	14.4215	11.9656	11.2112	875540	627090	689790	967750	449	563.5	607	784	5	4	3	2
PBANKA_1012800	voltage-dependent anion-selective channel protein	1012800			33.299	289	0	65.342	1	4	3	2	3	17.6	14.2	7.3	11.4	1324600	1123100	655500	1271000	60824	63058	203890	28601	0.787477	12.5319	12.3201	10.1392	9.43121	437350	527760	567010	636820	449	563.5	607	505	5	4	3	4
PBANKA_0835300	V-type proton ATPase subunit E	835300			27.263	235	0	69.406	1	5	4	3	3	31.9	19.6	21.7	15.7	917860	1008200	624180	565500	56550	80048	286140	48715	0.83008	12.4268	12.6643	10.6282	10.1995	289520	367530	339630	379190	449	563.5	607	625	5	4	3	3
PBANKA_1120200	pyridoxine biosynthesis protein PDX1	PDX1			32.689	297	0	27.266	1	5	4	3	4	19.2	18.9	14.1	18.9	1314600	849340	686510	736390	40652	77331	205130	40383	0.817292	11.9506	12.6145	10.148	9.92889	484520	323850	378140	411430	449	563.5	607	505	5	4	3	4
PBANKA_1461600	conserved protein, unknown function	1461600			181.02	1555	0	21.573	1	5	4	3	0	4.7	4	3.3	0	1168300	149570	170640	0	0	18843	23402	0	0.575906	2.42278	10.5775	7.01614	0.470791	519700	0	487660	0	449	563.5	607	1090.5	5	4	3	0
PBANKA_1409700	transducin beta-like protein TBL1	1409700			60.713	526	0	62.056	1	5	4	2	1	14.1	11.8	6.3	0	714850	649800	215570	0	7619.2	28594	70828	0	0.432813	9.53499	11.1792	8.61383	0.351542	272740	231790	264220	0	449	563.5	763	955	5	4	2	1
PBANKA_1451600	SUMO-activating enzyme subunit 2	UBA2			73.841	634	0	29.177	1	5	4	2	1	10.9	7.9	3.5	0	561310	344110	180920	0	2579.7	15592	32756	0	0.416494	7.97256	10.3043	7.50127	0.110929	182400	225800	0	0	449	563.5	763	955	5	4	2	1
PBANKA_1221200	60S ribosomal protein L34	RPL34	ribosome		18.869	164	0	12.581	1	3	2	1	2	15.9	10.4	0	10.4	2097100	1194100	0	1147500	229500	419420	0	169070	0.418515	14.4477	15.0538	0.352122	11.9947	1133500	800430	0	871000	449	563.5	1001	505	5	4	0	4
PBANKA_0707300	histone acetyltransferase GCN5	GCN5			151.08	1304	0	51.268	1	5	3	1	1	6.7	4.1	0	0	381450	283600	0	0	2425.2	2966.6	0	0	0.0583295	7.88346	7.91035	0.476651	0.444594	113220	115750	0	0	449	563.5	1001	955	5	4	0	1
PBANKA_1318100	aminopeptidase P	APP			89.893	776	0	121.25	1	5	5	7	8	8	8.6	12.1	12.2	477760	447860	966820	1043400	17600	9187.7	50852	16089	0.825131	10.7429	9.54125	8.13581	8.60122	188060	191420	272590	259400	449	473	258.5	219.5	5	5	8	9
PBANKA_0937100	vacuolar protein sorting-associated protein 35	VPS35			112.71	958	0	50.389	1	5	5	8	7	7.6	7.3	12.2	11.6	729020	841430	768270	1002300	19611	14135	66491	15606	0.810947	10.8989	10.1627	8.52267	8.55725	430450	385510	456570	580600	449	473	258.5	248.5	5	5	8	8
PBANKA_1018400	protein arginine N-methyltransferase 1	PRMT1			46.248	393	0	23.285	1	3	4	5	5	9.2	12.7	14.8	14.8	622120	452320	478350	427730	13129	18992	61165	11234	0.788431	10.32	10.5889	8.40221	8.08302	187990	170940	191160	223890	449	473	349.5	350.5	5	5	6	6
PBANKA_1216500	peptidyl-prolyl cis-trans isomerase	CYP19A			18.818	170	0	41.905	1	5	5	5	4	29.4	29.4	29.4	22.9	5432200	4916800	5640100	5149400	643680	679030	2642300	705010	0.880239	15.9356	15.7489	13.8352	14.0547	2299500	1864700	2605900	2510700	449	473	349.5	505	5	5	6	4
PBANKA_1223300	ras-related protein Rab-18	RAB18			23.126	201	0	95.576	1	5	5	6	6	30.8	30.8	35.8	37.3	1390500	1275400	1339400	1351400	124880	128330	485770	119450	0.850276	13.5698	13.3453	11.3917	11.4935	536850	549770	621440	561320	449	473	349.5	350.5	5	5	6	6
PBANKA_0410600	60S ribosomal protein L26	RPL26	ribosome		14.79	127	0	78.278	1	4	4	4	3	31.5	31.5	29.9	24.4	2590500	2555200	1875800	1854400	422740	607110	2133500	482290	0.87441	15.329	15.5874	13.5266	13.507	1069000	976890	900450	944090	449	473	416.5	505	5	5	5	4
PBANKA_0922800	small nuclear ribonucleoprotein Sm D1	SNRPD1			13.919	123	0	64.666	1	4	4	4	5	46.3	46.3	46.3	54.5	972780	1165700	726340	669050	111510	151820	562330	114460	0.853325	13.4064	13.5878	11.6029	11.4319	546950	551250	412560	362330	449	473	416.5	416.5	5	5	5	5
PBANKA_1023400	glutathione reductase	GR			56.513	497	0	55.888	1	5	5	5	4	13.7	14.9	13.9	11.7	314870	297420	340980	145230	5559.9	13370	45156	13942	0.853682	9.08041	10.0825	7.96443	8.39458	102320	92745	126220	84880	449	473	416.5	505	5	5	5	4
PBANKA_1117700	malate dehydrogenase	MDH			34.313	313	0	93.421	1	5	5	5	5	20.8	18.2	20.8	20.8	2378800	1730500	2421900	2988000	175760	139930	559950	142470	0.847875	14.0628	13.4701	11.5967	11.7477	844350	774000	1259200	1219300	449	473	416.5	350.5	5	5	5	6
PBANKA_1414400	exportin-T	1414400			136.68	1174	0	48.223	1	5	5	5	4	4.2	5.2	5.1	4.9	398040	477690	295240	288290	4804.8	6634.1	24321	4920.6	0.778304	8.86983	9.07144	7.07171	6.89205	125220	162840	132670	156720	449	473	416.5	505	5	5	5	4
PBANKA_1135100	40S ribosomal protein S15	RPS15	ribosome		17.257	151	0	45.737	1	5	3	3	3	36.4	25.8	23.8	21.9	2614600	3842600	2596800	2849700	168520	93825	637810	143750	0.87543	14.0021	12.8934	11.7846	11.7606	1863900	1885200	1689200	1795500	449	473	499	416.5	5	5	4	5
PBANKA_0832600	proteasome subunit beta type-6	PMSB6			31.722	275	0	61.976	1	5	5	4	4	30.2	26.9	24.4	26.5	2424100	1843300	1675100	1816400	97003	141140	418470	84459	0.830714	13.2053	13.4825	11.1766	10.9934	668670	702680	792380	821620	449	473	499	505	5	5	4	4
PBANKA_1222800	tyrosine--tRNA ligase	TyrRS			43.347	372	0	52.953	1	5	5	4	4	19.6	19.6	14.8	16.4	869780	1100300	373280	565550	28278	43489	145450	18664	0.795627	11.427	11.7841	9.65196	8.8154	313220	320930	266240	282520	449	473	499	505	5	5	4	4
PBANKA_1315500	sortilin	SORTLR			100.95	887	0	99.295	1	5	5	4	4	12	13.3	10.5	11.4	635870	577960	616170	633390	17119	3713.4	6790.5	1700.2	0.559219	10.7029	8.23428	5.2311	5.35892	330900	268920	400550	396510	449	473	499	505	5	5	4	4
PBANKA_1211500	U3 small nucleolar RNA-associated protein 13	1211500			140.16	1192	0	39.318	1	5	5	2	2	5.4	6.1	2.4	2.4	288890	381190	155130	165240	491.57	2182.3	6491.6	502.16	0.671785	5.58082	7.46739	5.16615	3.59944	123130	124010	95048	95187	449	473	607	625	5	5	3	3
PBANKA_1226500	proteasome subunit beta type-4	PMSB4			29.772	256	0	56.391	1	5	5	2	7	27	30.9	9.4	35.2	685020	1057200	372020	800120	42954	37998	153970	21884	0.795069	12.0301	11.5894	9.73409	9.04502	391910	413260	306260	399560	449	473	763	293	5	5	2	7
PBANKA_0524000	conserved Plasmodium protein, unknown function	524000			140.87	1188	0	84.735	1	5	5	2	3	6.7	6.7	2.4	3.5	417280	519890	84539	218270	3829.3	6924.2	19395	1483.1	0.673641	8.54244	9.13319	6.74519	5.16183	186040	181980	167990	139530	449	473	763	625	5	5	2	3
PBANKA_1242500	ATP-dependent RNA helicase DDX41	1242500			71.847	632	0	33.285	1	5	5	2	3	8.9	10.6	5.2	7	234170	308210	149530	222150	2101.1	5445.9	12435	1174.9	0.663885	7.6765	8.78671	6.10391	4.82576	143270	117790	116990	117880	449	473	763	625	5	5	2	3
PBANKA_0936500	replication factor C subunit 5	RFC5			40.517	349	0	44.129	1	5	6	8	8	18.1	20.6	27.8	28.4	1285900	1726400	2155600	2308000	129590	75639	427580	120790	0.866878	13.6232	12.5826	11.2076	11.5096	471240	509010	738210	735690	449	396.5	221.5	191	5	6	9	10
PBANKA_0412800	eukaryotic translation initiation factor 4E	eIF4E			26.905	227	0	62.993	1	5	6	6	7	26	29.1	31.3	36.1	2693500	3043400	2746000	2700800	173890	165440	711420	176880	0.864653	14.0474	13.7117	11.9421	12.0598	833920	721280	795750	735840	449	396.5	349.5	293	5	6	6	7
PBANKA_0618900	rhoptry protein	618900			25.863	225	0	152.65	1	5	6	6	6	28.9	33.8	34.7	34.7	2007700	2768200	1988800	2065500	129100	125480	551890	124300	0.858754	13.6177	13.3129	11.5758	11.5509	707070	922130	742440	866870	449	396.5	349.5	350.5	5	6	6	6
PBANKA_0405400	40S ribosomal protein S12	RPS12	ribosome		15.462	142	0	48.128	1	4	6	5	6	40.1	48.6	44.4	53.5	2858000	3235500	2721800	2578700	286520	317560	1266000	302420	0.870395	14.7678	14.6524	12.7736	12.8336	1191100	1157700	1716800	1323100	449	396.5	416.5	350.5	5	6	5	6
PBANKA_0313800	ATP synthase subunit alpha, mitochondrial	ATPalpha			61.361	548	0	74.087	1	5	5	5	5	11.1	13.9	13.3	13.9	374560	468550	399640	669230	24946	13697	72035	15371	0.803877	11.2461	10.1173	8.63821	8.53536	175310	157310	252540	299310	449	396.5	416.5	416.5	5	6	5	5
PBANKA_0918800	RNA cytosine C(5)-methyltransferase	NOP2			71.966	617	0	37.529	1	5	6	4	3	10.7	13.8	9.9	8.1	1052200	899610	532660	598890	21216	41579	111510	19494	0.798301	11.0124	11.7193	9.26861	8.87818	499710	453120	340440	491350	449	396.5	499	625	5	6	4	3
PBANKA_1135300	conserved Plasmodium protein, unknown function	1135300			363.8	3053	0	25.441	1	5	6	4	1	2.5	3.1	2	0	331170	268120	220030	0	269.01	1460.9	3456	0	0.384373	4.71109	6.8884	4.25668	0.201849	90117	79150	0	0	449	396.5	499	955	5	6	4	1
PBANKA_1008800	glucose-6-phosphate isomerase	1008800			68.074	586	0	22.072	1	5	6	3	4	11.3	10.8	5.8	7.3	489760	846520	342670	391180	12619	15799	66778	11054	0.805812	10.2629	10.3233	8.52888	8.05972	156580	180120	206720	210100	449	396.5	607	505	5	6	3	4
PBANKA_1417300	translocation protein SEC63	SEC63			77.763	669	0	50.396	1	5	6	3	3	10.2	12.4	5.8	5.8	941720	955580	423460	527950	3213.6	12017	31829	2321.3	0.728287	8.28954	9.92855	7.45985	5.80815	316630	262920	252000	325240	449	396.5	607	625	5	6	3	3
PBANKA_0905700	DNA-directed RNA polymerases I and III subunit RPAC1	RPAC1			38.705	334	0	26.059	1	5	5	2	2	18.9	19.5	7.5	8.4	740600	593840	159560	170610	7417.7	32200	70672	6937.3	0.767417	9.49633	11.3505	8.61065	7.38759	213500	156600	143340	140410	449	396.5	763	784	5	6	2	2
PBANKA_0921900	WD repeat-containing protein	921900			138.35	1168	0	99.825	1	5	5	2	4	5.7	5.7	2.5	5.4	607210	558040	333760	364240	5971.2	9954.3	29090	5471.4	0.763003	9.18338	9.65686	7.33003	7.04513	275560	198370	224330	159330	449	396.5	763	505	5	6	2	4
PBANKA_0813900	26S proteasome regulatory subunit RPN8	RPN8	expression		36.839	319	0	60.303	1	5	6	2	6	16.9	17.2	6.9	23.5	983380	1065300	218690	691280	37718	57846	171100	12864	0.755662	11.8425	12.1957	9.88628	8.27849	303710	285500	0	233140	449	396.5	763	293	5	6	2	7
PBANKA_1237600	zinc finger protein	1237600			190.79	1644	0	78.736	1	5	6	2	4	5	5.8	2.4	3.7	478430	482830	279800	337800	2337.5	3960.5	11840	1764.9	0.708399	7.83032	8.32722	6.03318	5.4128	136840	135210	175080	227060	449	396.5	763	505	5	6	2	4
PBANKA_1317500	glucose-6-phosphate dehydrogenase-6-phosphogluconolactonase	GluPho			109.71	950	0	90.237	1	5	7	10	7	6	8.2	11.5	8.4	2456000	2586100	2084100	1502700	32667	53392	187590	45306	0.848142	11.6351	12.0801	10.019	10.0948	934660	807690	696130	565930	449	336	187	293	5	7	10	7
PBANKA_1337100	splicing factor 1	SF1			82.54	710	0	35.135	1	4	6	4	3	8.3	11.7	7.6	5.6	852250	1259900	604890	645330	14487	20045	79216	15406	0.819449	10.462	10.6667	8.7753	8.53864	423470	484520	399540	444200	449	336	416.5	625	5	7	5	3
PBANKA_1113400	secreted ookinete protein	PSOP12			85.114	721	0	88.805	1	5	7	4	5	9.6	14.3	8	11	392070	537010	291100	2281100	51928	6716.2	76107	5429.8	0.7363	12.3038	9.08919	8.71754	7.03412	646900	636700	629750	838240	449	336	499	416.5	5	7	4	5
PBANKA_0927200	conserved protein, unknown function	927200			174.83	1474	0	44.982	1	5	7	3	3	4.8	6.6	2.7	3.1	328740	612570	176950	115950	846.67	3053.2	12117	2010.8	0.814937	6.36523	7.95186	6.06654	5.60099	100920	135810	90604	71103	449	336	607	625	5	7	3	3
PBANKA_1328100	ATP synthase (C/AC39) subunit	1328100			44.574	382	0	47.779	1	5	7	3	6	16	24.1	10.7	19.9	476010	821690	310600	595030	23801	19040	88133	12424	0.788095	11.1783	10.5925	8.92919	8.22828	166230	237810	217820	213750	449	336	607	350.5	5	7	3	6
PBANKA_1231800	60S ribosomal protein L12	RPL12	ribosome		18.214	165	0	188.9	1	5	6	6	6	43.6	48.5	48.5	48.5	7013300	6555200	6873800	6941000	771220	779250	3038400	763750	0.87752	16.1964	15.9475	14.0367	14.1702	2331600	2042600	2617900	2641500	449	292.5	299	350.5	5	8	7	6
PBANKA_1025500	CCR4-NOT transcription complex subunit NOT1	1025500			481.85	4169	0	74.73	1	5	7	6	5	1.6	2.2	1.9	1.7	360520	476990	362630	236040	881.66	1381.7	5810.1	1452.3	0.766171	6.42365	6.80799	5.00614	5.13156	137240	107340	130920	128800	449	292.5	349.5	416.5	5	8	6	5
PBANKA_1115200	gamete egress protein GEP	GEP			132.84	1138	0	210.09	1	5	9	14	10	5.7	10.1	15.6	12.2	869570	1288900	2025800	2747300	36966	12528	93846	26357	0.840888	11.8135	9.98863	9.0198	9.31333	351830	352830	673020	831020	449	255.5	105	136.5	5	9	14	12
PBANKA_1214000	heat shock protein 60	HSP60			62.246	579	0	84.283	1	4	7	9	7	7.9	18.1	21.1	16.1	448340	1163200	1290800	1705000	43457	11900	116510	32598	0.862964	12.0469	9.91443	9.33189	9.61993	156540	209640	320450	407430	449	255.5	161	191	5	9	11	10
PBANKA_0704700	conserved Plasmodium protein, unknown function	704700			57.267	487	0	199.8	1	5	8	9	7	14	21.4	24.8	18.3	1603300	2239800	2413200	2509200	23171	17117	110550	32634	0.874836	11.1396	10.4389	9.25614	9.62152	745030	772300	1073900	1101500	449	255.5	221.5	293	5	9	9	7
PBANKA_1122000	nuclear polyadenylated RNA-binding protein NAB2	NAB2			88.284	765	0	91.284	1	4	9	5	3	7.3	15	8.2	4.7	598520	1295300	382440	327930	11712	21376	93007	13659	0.830603	10.1553	10.7595	9.00685	8.365	235970	332250	176930	190660	449	255.5	416.5	625	5	9	5	3
PBANKA_1201100	conserved Plasmodium protein, unknown function	1201100			106.81	912	0	44.96	1	5	8	2	6	8.9	12.5	3.1	9.4	322230	514480	154140	379860	5187.6	5555.7	22271	2657.5	0.72758	8.98042	8.81551	6.94467	6.00329	90854	111730	81193	101520	449	255.5	763	350.5	5	9	2	6
PBANKA_0718800	small GTP-binding protein sar1	SAR1			21.915	191	0	165.73	1	4	7	6	5	33.5	51.8	46.1	39.3	1032900	2452200	1563300	1754800	106150	48552	367260	78104	0.86512	13.3353	11.943	10.9882	10.8805	501660	672570	579270	690310	449	220.5	221.5	350.5	5	10	9	6
PBANKA_0910200	protein phosphatase PPM2	PPM2			89.122	787	0	62.078	1	5	10	5	6	9.5	20.6	8.8	13.1	1004100	1628100	669020	1072500	19460	20470	90981	16725	0.816883	10.8878	10.697	8.97507	8.65715	318020	322950	293300	341200	449	220.5	416.5	293	5	10	5	7
PBANKA_1137000	bergheilysin	BLN			133.53	1149	0	123.26	1	5	12	8	15	5.8	12.8	9.4	17.6	400950	1207100	655410	1699800	23729	6059.4	59566	11109	0.816861	11.1739	8.94072	8.364	8.06688	140640	222290	211360	338390	449	145.5	258.5	80.5	5	13	8	16
PBANKA_1214200	ribonucleoside-diphosphate reductase small chain	1214200			40.134	335	0	21.896	1	4	2	4	5	14.3	7.5	16.4	17.3	1269700	600980	1031200	1267800	53081	54313	181970	49106	0.82594	12.3355	12.1048	9.97514	10.211	539780	410960	554070	650020	383.5	846	499	293	6	2	4	7
PBANKA_1406800	40S ribosomal protein S27	RPS27	ribosome		9.2008	82	0	68.433	1	4	3	4	4	35.4	35.4	35.4	35.4	5105600	3689000	3475400	4605900	868590	943470	3119500	660110	0.860183	16.3679	16.2234	14.0747	13.9598	2262500	1980200	2171800	2644100	383.5	676.5	416.5	416.5	6	3	5	5
PBANKA_0314500	40S ribosomal protein S26	RPS26	ribosome		12.534	107	0	60.469	1	5	3	5	4	43.9	29	43.9	35.5	3782500	3019600	2734200	2821000	518530	698700	2287600	511870	0.866502	15.6236	15.7901	13.6272	13.5929	2600800	2096300	1924400	2406900	383.5	563.5	349.5	293	6	4	6	7
PBANKA_0103900	KH domain-containing protein	103900			82.056	735	0	141.76	1	6	4	6	5	11.4	8.2	11.4	9.9	2486800	2457300	2177100	1950500	54182	69079	251990	60474	0.844438	12.3651	12.4517	10.4448	10.5115	933580	963910	970000	865640	383.5	563.5	349.5	416.5	6	4	6	5
PBANKA_0101000	MYND-type zinc finger protein	101000			30.737	262	0	95.238	1	6	3	4	4	27.1	15.6	21	20.6	1254400	745020	929220	987110	70508	89602	279700	66373	0.830635	12.7451	12.827	10.5953	10.6457	522920	588520	439990	468040	383.5	563.5	416.5	505	6	4	5	4
PBANKA_1210900	phosphoglucomutase	1210900			68.16	593	0	54.771	1	6	4	4	4	15.2	6.6	8.1	9.9	1080900	575970	545000	404930	12269	36632	88935	19464	0.818894	10.2223	11.5366	8.94226	8.87595	350760	435790	383240	386720	383.5	563.5	416.5	505	6	4	5	4
PBANKA_1144000	26S proteasome regulatory subunit RPN11	RPN11	expression		35.152	311	0	16.245	1	6	4	5	4	18.3	14.5	17	13.8	875620	617190	362030	466420	25912	46129	125800	19470	0.790631	11.3009	11.8691	9.44257	8.8764	337110	288500	222710	292090	383.5	563.5	416.5	505	6	4	5	4
PBANKA_1236300	ATP-dependent RNA helicase DDX1	DDX1	DNA replication & repair		93.917	809	0	57.479	1	6	4	3	4	11.9	8.8	6.2	7.9	980180	810360	327270	590600	9740.4	15249	43039	5980	0.74739	9.88934	10.2722	7.89515	7.17336	634270	528210	243270	428480	383.5	563.5	499	505	6	4	4	4
PBANKA_1348900	chaperone binding protein	1348900			61.001	509	0	53.6	1	5	4	3	3	11.6	10	4.7	8.1	494940	562260	322090	424200	21210	21073	86501	16105	0.804789	11.012	10.7389	8.90223	8.60266	233930	240640	253030	210490	383.5	563.5	607	625	6	4	3	3
PBANKA_0609900	heat shock protein DNAJ homologue Pfj4	609900			27.879	245	0	51.26	1	4	3	2	4	22.9	22.4	17.1	22.9	1425800	1171000	388310	796850	77987	149610	369910	29573	0.774009	12.8905	13.5666	10.9986	9.47943	546110	590790	485430	414270	383.5	563.5	763	505	6	4	2	4
PBANKA_1226600	tubulin gamma chain	TUBG	KT_spindle_MTOC		51.609	452	0	24.644	1	6	4	5	4	15.9	11.5	12.6	10.2	719880	383620	648230	565430	20942	26662	84596	22783	0.814301	10.9937	11.0783	8.8701	9.1031	235760	258310	293660	238470	383.5	473	349.5	505	6	5	6	4
PBANKA_1309900	M17 leucyl aminopeptidase	LAP			72.093	635	0	108.35	1	6	5	5	4	12.3	10.4	9.6	7.7	1319000	1262000	736590	960050	29093	39969	129630	22321	0.802384	11.468	11.6624	9.48584	9.07355	505830	530840	339680	453440	383.5	473	349.5	505	6	5	6	4
PBANKA_1205900	AP2 domain transcription factor AP2-I	ApiAP2			156.69	1398	0	72.082	1	6	5	6	5	6.5	5.4	6.1	5.1	878080	920250	473840	674850	13232	17217	57785	9291.1	0.776244	10.3313	10.4473	8.3202	7.80907	251910	268190	200440	258940	383.5	473	349.5	416.5	6	5	6	5
PBANKA_0809100	proteasome activator 28	PA28			32.812	278	0	73.851	1	5	4	4	5	24.8	19.8	20.1	23	351950	457660	360980	433030	12481	10996	49740	11040	0.806177	10.247	9.80045	8.10391	8.05789	104080	115080	135540	171360	383.5	473	416.5	350.5	6	5	5	6
PBANKA_1407400	mRNA-decapping enzyme 2	1407400			159.64	1374	0	30.946	1	6	5	4	3	7.1	5.9	4.1	3.3	576040	479280	673190	181100	2045.9	7140.6	23352	8419.5	0.872995	7.63809	9.17759	7.01305	7.66695	252490	260820	446440	203140	383.5	473	499	625	6	5	4	3
PBANKA_0404000	protein dopey homolog	404000			393.73	3311	0	50.525	1	5	5	3	3	2.5	2.5	1.5	1.7	265730	397150	75285	195200	1155	1572.4	5522.9	445.47	0.60543	6.81325	6.99451	4.93301	3.42662	88992	82574	58897	93084	383.5	473	607	625	6	5	3	3
PBANKA_1426200	CCR4-associated factor 1	CAF1			202.16	1801	0	45.488	1	6	5	3	4	5.2	4.1	2.2	3.2	475420	573470	197330	379380	5343.4	6696	22896	2779.4	0.720821	9.02311	9.08484	6.9846	6.06799	179220	209290	119630	180700	383.5	473	607	505	6	5	3	4
PBANKA_0111200	nucleolar GTP-binding protein 1	111200			78.442	677	0	29.038	1	6	5	2	4	12.3	9.5	4.7	8.9	492930	527700	93091	145240	4271.8	13560	36090	2738	0.727939	8.7002	10.1028	7.64111	6.04634	138140	137970	87166	60495	383.5	473	763	505	6	5	2	4
PBANKA_1350600	nuclear movement protein	NUDC			41.775	355	0	50.294	1	6	5	2	4	20.8	18.6	6.8	13.8	795840	685240	243240	488170	10348	27890	56438	2454.4	0.671158	9.97663	11.1432	8.28618	5.88859	307910	307440	264030	225850	383.5	473	763	416.5	6	5	2	5
PBANKA_1137900	proliferating cell nuclear antigen 1	PCNA1			30.674	274	0	135.66	1	6	5	8	6	31.8	21.2	36.9	26.3	1420000	629060	2208700	799770	49986	85295	304270	133180	0.89452	12.2488	12.7559	10.7168	11.6505	460590	559040	1010800	660360	383.5	396.5	258.5	350.5	6	6	8	6
PBANKA_0506600	serine/arginine-rich splicing factor 4	SRSF4			55.65	481	0	40.619	1	4	5	5	3	11.9	11.2	13.7	8.5	297980	1171400	464220	247050	9494.2	10701	79955	16142	0.886867	9.8524	9.76122	8.7887	8.60597	284800	469070	288990	287540	383.5	396.5	349.5	505	6	6	6	4
PBANKA_1036600	ribonucleoside-diphosphate reductase small chain	1036600			40.485	349	0	51.384	1	6	5	6	5	24.1	18.6	24.1	20.9	1237200	1130700	1144600	1117700	49300	57449	212020	50830	0.837878	12.2289	12.1858	10.1956	10.2608	611860	562170	737100	747880	383.5	396.5	349.5	416.5	6	6	6	5
PBANKA_1101400	rhoptry-associated protein 2/3	RAP2/3			45.696	388	0	92.345	1	5	5	5	6	17.5	16.5	17.5	20.9	751660	774260	702780	980520	30219	11759	78068	18362	0.819147	11.5227	9.89724	8.75424	8.79187	324520	352610	336590	320510	383.5	396.5	416.5	350.5	6	6	5	6
PBANKA_1222300	coatomer subunit epsilon	SEC28			33.674	283	0	115.77	1	6	6	5	6	31.8	29	19.8	22.6	900890	669450	514510	680840	30248	34362	114100	22360	0.800134	11.5241	11.4443	9.30174	9.07607	266570	195850	178680	188980	383.5	396.5	416.5	350.5	6	6	5	6
PBANKA_0605300	eukaryotic translation initiation factor 5	EIF5	expression		58.939	515	0	81.462	1	6	6	5	1	13.6	13.6	13.4	0	917200	822430	489520	0	3094.8	30139	77061	0	0.449819	8.2352	11.2551	8.73551	0.0316006	390430	330260	245290	0	383.5	396.5	416.5	955	6	6	5	1
PBANKA_1211300	autophagy-related protein 18	ATG18			43.534	380	0	82.898	1	5	5	4	5	16.1	17.6	13.7	16.8	592580	690450	474140	431090	16617	23228	83677	18234	0.818789	10.6599	10.8793	8.85434	8.78178	196530	263760	200050	158340	383.5	396.5	499	416.5	6	6	4	5
PBANKA_1364200	60S ribosomal protein L17	RPL17	ribosome		22.853	198	0	158.52	1	6	6	4	6	32.8	28.3	20.7	29.3	6424500	5618900	4943400	3199800	311910	636170	2004300	494340	0.883251	14.8903	15.6548	13.4365	13.5426	4882700	4192800	4915700	4302400	383.5	396.5	499	350.5	6	6	4	6
PBANKA_1348100	AMMECR1 domain-containing protein	1348100			27.101	231	0	85.642	1	6	6	4	5	32.5	34.6	21.6	29	1144400	1202000	581190	852460	65574	86109	269740	44707	0.811437	12.6404	12.7696	10.543	10.0756	457430	509070	436440	395530	383.5	396.5	499	416.5	6	6	4	5
PBANKA_1452500	conserved Plasmodium protein, unknown function	1452500			81.031	722	0	38.86	1	5	6	3	4	9.4	10.7	5.7	8.7	967940	1094200	616270	779820	27126	32067	119380	22825	0.813365	11.367	11.3446	9.367	9.10576	465860	503390	422380	488760	383.5	396.5	607	505	6	6	3	4
PBANKA_1135600	exosome complex exonuclease RRP44	DIS3			119.42	1017	0	38.085	1	6	6	3	3	6.6	6.6	2.9	3.8	484510	422840	218340	197520	3147.5	8280.6	22407	3898.9	0.765388	8.25956	9.39128	6.95346	6.55629	178670	152930	124930	126070	383.5	396.5	607	625	6	6	3	3
PBANKA_1017100	DNA mismatch repair protein MSH2	1017100			94.648	811	0	56.977	1	6	6	3	4	9.7	9.9	4.8	6.2	554680	795900	121600	398360	8852.5	10710	34756	2702.3	0.697667	9.75144	9.76243	7.58677	6.02741	170780	259880	0	162280	383.5	396.5	607	505	6	6	3	4
PBANKA_0616500	translation machinery-associated protein	616500			20.551	177	0	44.694	1	6	6	1	0	39.5	40.1	0	0	1096900	1185900	0	0	0	76162	0	0	0.0243548	2.44728	12.5925	0.28543	0.0808616	376750	396330	0	0	383.5	396.5	1001	1090.5	6	6	0	0
PBANKA_1032100	rhoptry-associated protein 1	RAP1			70.686	604	0	109.91	1	6	7	8	10	13.2	21.2	17.5	23.8	989830	905650	1590600	1377200	27613	19732	96640	35938	0.854159	11.3926	10.644	9.06213	9.76066	374900	315770	472290	385950	383.5	336	258.5	191	6	7	8	10
PBANKA_1117500	ribosomal protein L27a	RPL27a	ribosome		16.837	148	0	45.998	1	4	4	5	4	30.4	30.4	35.8	29.1	7241900	6285100	6427000	4715200	560980	860380	2935500	773230	0.885238	15.7372	16.0904	13.987	14.188	3317300	2990100	3236900	2507200	383.5	336	299	219.5	6	7	7	9
PBANKA_1305100	60S ribosomal protein L1	RPL1	ribosome		24.819	217	0	104.54	1	4	4	4	7	18.9	22.6	23.5	26.3	839470	696990	1201200	1070100	92591	78590	341170	108230	0.862552	13.1382	12.6378	10.8819	11.3512	307960	245450	373580	389870	383.5	336	349.5	248.5	6	7	6	8
PBANKA_1145800	membrane associated histidine-rich protein 1a	MAHRP1a			20.369	179	0	275.14	1	4	5	3	3	34.1	41.3	25.1	25.1	6951900	6019100	6398900	8090200	885950	818000	3026900	668070	0.864081	16.3964	16.0175	14.0312	13.9771	3137200	2502600	3483900	3992800	383.5	336	349.5	293	6	7	6	7
PBANKA_0503600	60S ribosomal protein L30e	RPL30e	ribosome		11.813	108	0	195.64	1	4	5	5	5	54.6	63	63	63	9836600	8783000	6713100	6368300	1257200	1927200	6235600	1322400	0.8794	16.9014	17.2538	15.0739	14.9622	5937700	5155700	5307300	4218600	383.5	336	416.5	350.5	6	7	5	6
PBANKA_0513600	adenosine deaminase	ADA			41.989	363	0	96.338	1	6	8	8	6	22	29.8	26.2	21.5	1055000	1826700	1655700	1466100	58416	50238	266550	78843	0.875503	12.4736	11.9922	10.5258	10.8941	448430	550320	686850	681850	383.5	292.5	258.5	350.5	6	8	8	6
PBANKA_1326800	replication factor C subunit 3	RFC3	DNA replication & repair		39.319	344	0	60.868	1	6	5	5	5	19.5	19.8	14.8	17.2	814310	678780	751000	738270	13656	23551	74143	27123	0.847641	10.3768	10.8993	8.67982	9.35466	247310	199530	280730	324370	383.5	292.5	299	350.5	6	8	7	6
PBANKA_1034400	plasmepsin IV	PM4			50.482	450	0	161.31	1	4	7	5	4	12	18.9	14	10.7	3843100	4771900	5574500	6042400	248350	162810	847500	238030	0.873724	14.5616	13.6886	12.1946	12.4882	1663100	1947600	2821400	3404400	383.5	292.5	349.5	416.5	6	8	6	5
PBANKA_1440700	ubiquitin-activating enzyme E1	UBA1			128.95	1120	0	64.888	1	5	7	6	6	5.9	8.8	6.7	6.6	688240	1054600	916350	879430	11745	8577.1	44205	12404	0.824416	10.1593	9.44203	7.93372	8.22595	248790	223500	271960	286000	383.5	292.5	349.5	350.5	6	8	6	6
PBANKA_1222900	26S proteasome regulatory subunit RPN10	RPN10	expression		47.957	422	0	69.352	1	6	8	6	5	19.4	26.8	20.1	16.1	1081200	1372100	877140	691930	30084	42787	167790	36696	0.844135	11.5163	11.7606	9.85809	9.79077	602710	555980	521180	452930	383.5	292.5	349.5	416.5	6	8	6	5
PBANKA_1025200	H/ACA ribonucleoprotein complex subunit 4	CBF5			51.451	456	0	89.005	1	6	8	4	4	21.3	23.5	11.6	10.3	1646200	1802400	852200	893180	35727	65239	207150	34088	0.822364	11.7643	12.3692	10.1621	9.68441	876610	702040	531430	587280	383.5	292.5	499	505	6	8	4	4
PBANKA_1313800	signal recognition particle subunit SRP54	SRP54	expression		55.801	500	0	90.548	1	6	8	4	6	19	24	9.4	19.2	1504200	1670500	554530	913600	23449	49981	148330	20538	0.805201	11.1568	11.9848	9.68025	8.95344	417080	432450	386620	354160	383.5	292.5	499	350.5	6	8	4	6
PBANKA_1415000	pre-mRNA-processing factor 40	PRP40			93.422	789	0	88.23	1	6	8	4	5	10.6	14.4	7.4	9	1087700	1366500	531500	688730	18990	28917	98125	13882	0.792478	10.8525	11.1954	9.08413	8.38836	390220	417270	341380	293180	383.5	292.5	499	416.5	6	8	4	5
PBANKA_1139400	polyubiquitin binding protein	DOA1			99.91	849	0	73.4	1	6	8	3	7	9.3	11.4	4.2	10	517400	656950	229320	537520	7239.6	9273.5	30407	3071.5	0.71551	9.46126	9.55466	7.39391	6.21216	117340	176230	107770	143750	383.5	292.5	607	293	6	8	3	7
PBANKA_0828000	gametocyte development protein GD1	TIS11-like			142.19	1233	0	151.63	1	6	8	8	6	6.9	9.2	8.8	6.7	579270	588140	674870	470830	7847.2	9654.4	38552	11248	0.824435	9.57753	9.61273	7.73631	8.08482	160390	143270	198640	146670	383.5	220.5	258.5	350.5	6	10	8	6
PBANKA_0203800	phenylalanine--tRNA ligase alpha subunit	FRS1alpha			65.58	555	0	75.339	1	6	9	4	5	16	23.2	10.5	14.2	1047600	1731400	566270	542810	8637.9	13599	60443	11663	0.833485	9.71604	10.107	8.38508	8.13709	331580	372120	270910	290130	383.5	220.5	499	416.5	6	10	4	5
PBANKA_0821700	inosine-5-monophosphate dehydrogenase	821700			55.898	507	0	58.216	1	6	9	7	7	17.2	25.4	20.1	20.1	1599400	2118300	1472000	1299900	39989	61515	225520	50556	0.84827	11.9269	12.2844	10.2847	10.253	610400	594090	598630	535640	383.5	191.5	299	293	6	11	7	7
PBANKA_1213600	cysteine--tRNA ligase	CysRS			78.377	668	0	53.457	1	6	10	5	4	12	20.2	11.1	7.8	1043100	1255300	416040	448860	11428	26658	77248	9049.3	0.778852	10.1199	11.078	8.73901	7.77102	378560	354830	264960	300680	383.5	191.5	416.5	505	6	11	5	4
PBANKA_1311800	U3 small nucleolar RNA-associated protein 12	1311800			138.76	1184	0	12.19	1	7	1	2	2	6.3	0	1.8	1.9	1470500	0	207720	95766	1741.2	0	13294	3776.7	1.33737	7.40544	2.09879	6.20028	6.51034	705100	0	345370	281440	331.5	1049.5	763	625	7	0	2	3
PBANKA_1213000	transcriptional coactivator ADA2	1213000			275.95	2382	0	27.28	1	7	2	3	3	5	1.6	2.1	2.1	476990	108740	150060	244560	1933.2	2952.4	6668.8	1129.5	0.645152	7.55635	7.90343	5.20501	4.7689	147980	81661	80809	94339	331.5	846	607	505	7	2	3	4
PBANKA_1450200	serine hydroxymethyltransferase	SHMT			49.624	442	0	65.015	1	7	3	6	8	21.9	9	18.1	23.3	987240	429650	1027800	1428700	48888	34504	134710	34790	0.813585	12.2168	11.4502	9.54129	9.71382	425000	313670	449440	543070	331.5	676.5	299	219.5	7	3	7	9
PBANKA_0210200	aspartate--tRNA ligase	DRS1			81.205	686	0	89.651	1	5	4	5	5	8.6	6.6	9.6	8.2	729470	698070	496080	714250	16104	15523	58759	8762.4	0.768383	10.6147	10.2979	8.34432	7.72454	213070	275290	276780	275580	331.5	563.5	299	350.5	7	4	7	6
PBANKA_0605400	conserved Plasmodium protein, unknown function	605400			80.762	677	0	36.307	1	6	4	6	6	11.2	7.1	10.3	10.9	1028600	482120	696290	641710	17344	26275	73870	18819	0.803615	10.7217	11.0572	8.6745	8.82734	288640	230200	186840	229100	331.5	563.5	349.5	350.5	7	4	6	6
PBANKA_0717000	ATPase GET3	717000			42.984	379	0	39.817	1	5	4	3	3	18.2	16.1	8.4	10.3	726330	473320	527950	436420	24246	34622	114490	29331	0.828512	11.205	11.4552	9.30666	9.46757	331980	314060	339200	410150	331.5	563.5	607	625	7	4	3	3
PBANKA_0922300	threonine--tRNA ligase	ThrRS			103.66	890	0	60.001	1	7	5	6	5	11.7	8.3	10.1	8.8	657960	440130	697300	482920	3767.5	7146.7	23046	7366.9	0.817521	8.51896	9.17882	6.99402	7.47428	157510	148830	185150	180350	331.5	473	299	416.5	7	5	7	5
PBANKA_0408600	eukaryotic translation initiation factor 3 subunit K	EIF3K	expression		28.001	235	0	161.68	1	6	4	6	6	35.3	27.7	35.3	37.9	3096000	2413900	1976700	2167700	159300	229860	716950	148230	0.845274	13.921	14.1862	11.9533	11.8049	1056700	872610	839930	886830	331.5	473	349.5	293	7	5	6	7
PBANKA_0511400	peroxiredoxin	nPrx			44.507	389	0	126.96	1	6	4	5	7	23.1	15.4	18.5	23.1	4875600	4097100	2384800	4007000	391050	459120	1457600	220190	0.83395	15.2166	15.1843	12.977	12.3758	1620900	1377400	1370100	1458800	331.5	473	349.5	248.5	7	5	6	8
PBANKA_1023800	conserved Plasmodium protein, unknown function	1023800			227.15	1902	0	64.187	1	7	5	5	5	5.5	3.6	3.6	3.8	485880	323460	256960	281010	1856.3	3724.8	10054	1888	0.718544	7.49778	8.2387	5.79728	5.51008	125300	100950	100220	100180	331.5	473	416.5	416.5	7	5	5	5
PBANKA_0109200	transcription elongation factor SPT5	SPT5	DNA replication & repair		136.05	1174	0	80.951	1	6	4	2	2	8.3	5.1	2.2	3.4	479860	421840	166570	146570	1371.2	6424.1	17529	2922.3	0.791975	7.06079	9.02504	6.59925	6.14032	151140	130740	0	99847	331.5	473	763	784	7	5	2	2
PBANKA_1426000	histone-arginine methyltransferase CARM1	CARM1			100.34	857	0	72.025	1	7	4	2	1	10.6	6.9	2.7	0	908460	1545300	1071100	0	1502.9	17099	72522	0	0.518551	7.1931	10.4374	8.64793	0.494372	964180	883430	0	0	331.5	473	763	955	7	5	2	1
PBANKA_0801600	conserved Plasmodium protein, unknown function	801600			477.82	3976	0	19.668	1	7	5	2	3	2.3	2	0.5	0.8	928520	400030	557630	576030	2642.4	4124.5	10905	2557.9	0.723644	8.0072	8.38576	5.9145	5.94818	494500	531470	420460	338930	331.5	473	763	625	7	5	2	3
PBANKA_1226100	conserved Plasmodium protein, unknown function	1226100			632.79	5324	0	27.355	1	7	5	2	0	1.7	1.2	0.5	0	390620	200880	124520	0	0	1435.1	2599.1	0	0.435951	2.41526	6.86269	3.84559	0.199143	112890	87354	0	0	331.5	473	763	1090.5	7	5	2	0
PBANKA_1144100	ABC transporter E family member 1	ABCE1			70.141	619	0	46.507	1	6	6	8	7	13.4	12.9	18.4	15.7	1030300	815380	916410	1019000	17837	15891	63755	15985	0.808478	10.7622	10.3317	8.46205	8.59187	457280	329970	371130	419560	331.5	396.5	221.5	248.5	7	6	9	8
PBANKA_0100900	ATP-dependent RNA helicase MTR4	100900			150.87	1300	0	107.53	1	7	6	9	6	7.2	6.8	9.6	7	448870	326130	408260	284550	3032.9	4433.5	14601	4272.9	0.780066	8.20605	8.48999	6.33558	6.68843	91598	82290	86082	77438	331.5	396.5	221.5	350.5	7	6	9	6
PBANKA_1126200	protein DJ-1	DJ1			20.707	189	0	92.461	1	7	6	6	7	49.7	47.6	38.1	56.1	1945000	1567300	1572300	2150700	208990	194500	706400	149760	0.840534	14.3126	13.9452	11.9319	11.8197	711560	579720	780940	930580	331.5	396.5	299	248.5	7	6	7	8
PBANKA_1112300	ras-related protein Rab-1B	RAB1b			22.906	200	0	203.94	1	6	4	5	4	39	30	35	25.5	1149000	884820	1169700	1194300	74641	71811	274860	73103	0.842916	12.8273	12.5077	10.5701	10.7851	640150	471110	789880	795950	331.5	396.5	349.5	416.5	7	6	6	5
PBANKA_1338600	60S ribosomal protein L23	RPL23	ribosome		20.691	181	0	171.64	1	6	5	5	4	21.5	17.7	17.7	13.8	3379800	3267500	2765300	1907300	335400	619440	2065000	505180	0.883766	14.9951	15.6164	13.4795	13.5739	1081300	974580	1055700	809010	331.5	396.5	349.5	416.5	7	6	6	5
PBANKA_1444000	macrophage migration inhibitory factor	MIF			12.935	116	0	139.34	1	6	5	5	4	61.2	53.4	53.4	45.7	3481000	2447000	2352300	2616600	311500	418380	1294900	280230	0.85274	14.8884	15.0502	12.8062	12.7237	1072000	931150	1022800	1028000	331.5	396.5	349.5	416.5	7	6	6	5
PBANKA_0928100	phosphoglycerate mutase	PGM1			28.707	250	0	76.12	1	7	6	6	8	29.6	34.4	24.8	30.4	1144600	1135700	709660	1361700	72350	67329	246530	41745	0.809222	12.7823	12.4147	10.4132	9.97675	459310	458230	525180	487180	331.5	396.5	349.5	248.5	7	6	6	8
PBANKA_1346700	60S ribosomal protein L23	RPL23	ribosome		14.974	139	0	124.86	1	4	3	2	3	38.1	32.4	25.2	30.9	9891000	7996900	5835700	5583600	661970	1133800	3337200	657760	0.866382	15.976	16.4885	14.172	13.9546	6215100	5724000	4491300	3573400	331.5	396.5	416.5	350.5	7	6	5	6
PBANKA_1314100	E3 ubiquitin-protein ligase ZNF598	1314100			196.76	1653	0	111.39	1	7	6	3	5	6.2	5.2	2.7	3.6	828730	789960	265410	469400	5274.1	9311.5	26444	2982.2	0.71975	9.00428	9.56056	7.19245	6.1696	329050	241980	168730	214070	331.5	396.5	607	416.5	7	6	3	5
PBANKA_0517500	bromodomain protein 1	BDP1			55.988	489	0	29.429	1	7	6	2	2	20.7	19.4	6.3	8.4	697850	679510	296220	367940	11150	21147	61864	8976.3	0.776731	10.0843	10.7439	8.41861	7.75934	466040	360820	338370	306510	331.5	396.5	763	784	7	6	2	2
PBANKA_1129100	DNA polymerase epsilon catalytic subunit A	POLE-A	DNA replication & repair		334.3	2826	0	103.1	1	7	7	9	10	3.6	3.4	4.2	4	511860	519100	849770	691640	3839.1	3136	15476	5315.2	0.811708	8.54612	7.99047	6.41954	7.00334	147710	143640	241910	220990	331.5	336	161	160.5	7	7	11	11
PBANKA_1102200	merozoite surface protein 8	MSP8			46.737	409	0	105.63	1	6	6	9	10	26.9	20.5	37.7	40.3	2580500	1959900	5453800	5801700	199870	90116	576370	203180	0.882391	14.2483	12.8353	11.6384	12.2598	952180	530770	1734500	1701000	331.5	336	187	103	7	7	10	14
PBANKA_0416600	replication protein A1, small fragment	RPA1			56.538	486	0	135.45	1	7	6	10	6	17.9	17.1	24.7	16.3	2029000	2154500	3646400	2898900	87800	64271	334580	114860	0.877272	13.0615	12.3476	10.8538	11.437	585120	661570	1118900	1072200	331.5	336	187	350.5	7	7	10	6
PBANKA_1130500	proteasome subunit alpha type-7	PMSA7			27.18	241	0	152.82	1	5	6	6	6	30.3	39.4	39.4	40.2	3224500	3669000	2878200	3845200	200340	174600	739820	169880	0.855893	14.2517	13.7895	11.9986	12.0016	816720	876910	943550	1167500	331.5	336	258.5	248.5	7	7	8	8
PBANKA_0941900	histone H4	H4			11.455	103	0	192.49	1	6	6	6	6	52.4	51.5	51.5	51.5	5930900	10357000	10898000	9013300	1480800	954750	5906100	1789600	0.910605	17.1375	16.2405	14.9956	15.3986	3139700	3372000	4427900	3336700	331.5	336	258.5	219.5	7	7	8	9
PBANKA_1231000	40S ribosomal protein S11	RPS11	ribosome		16.074	151	0	104.84	1	6	6	7	5	47.7	47.7	47.7	44.4	7745600	7687800	6457900	5851500	975240	1235100	4470700	1023300	0.880507	16.535	16.612	14.5939	14.5922	3019900	3066900	3114200	2914400	331.5	336	258.5	416.5	7	7	8	5
PBANKA_1134200	pyrroline-5-carboxylate reductase	1134200			28.329	260	0	82.094	1	5	6	6	6	25.8	33.1	28.8	28.8	2247700	2056000	1658500	1814700	110940	131970	486900	97122	0.843395	13.399	13.3856	11.3951	11.1949	642990	645880	586610	577140	331.5	336	299	293	7	7	7	7
PBANKA_1025800	prefoldin subunit 2	1025800			14.659	128	0	75.113	1	5	6	6	6	46.1	53.1	52.3	53.1	902650	864820	735550	870780	58843	66567	252540	52741	0.834405	12.4842	12.3983	10.4479	10.3141	188760	167030	199900	187320	331.5	336	299	248.5	7	7	7	8
PBANKA_1009100	ataxin-2 like protein	1009100			94.041	818	0	72.09	1	7	7	5	5	11.2	11.9	8.1	7.8	1524300	1552800	910410	1199200	31557	40114	136490	23958	0.805747	11.5852	11.6676	9.56023	9.17565	311830	311950	306160	339420	331.5	336	299	416.5	7	7	7	5
PBANKA_0810600	exoribonuclease	810600			151.84	1293	0	33.382	1	7	7	6	5	8.4	7.3	7.3	5.8	336230	515100	356870	266510	4369	5069	21125	5850.3	0.804448	8.73266	8.68324	6.86846	7.14173	124970	134460	129710	109050	331.5	336	349.5	416.5	7	7	6	5
PBANKA_1457400	N-alpha-acetyltransferase 15, NatA auxiliary subunit	1457400			146.12	1228	0	58.679	1	7	7	5	4	8.1	8.2	4.8	4.2	743270	873060	494860	663340	8152.2	10772	38749	7171.9	0.782302	9.63254	9.77076	7.74367	7.43557	426990	456400	378530	414470	331.5	336	416.5	416.5	7	7	5	5
PBANKA_1228400	mannose-6-phosphate isomerase	1228400			95.518	814	0	21.722	1	6	6	2	4	8.8	10.1	2.6	6.1	601780	440260	269130	341320	6675.6	13261	33888	6116.6	0.760046	9.34425	10.0707	7.55028	7.20595	264950	179340	222280	193640	331.5	336	763	505	7	7	2	4
PBANKA_1035100	rRNA 2-O-methyltransferase fibrillarin	NOP1			33.356	312	0	56.78	1	6	7	6	5	25.6	31.7	29.2	26.6	2025500	2405400	1538400	1167400	49068	74657	287320	69154	0.860938	12.2221	12.5637	10.6341	10.705	555960	598000	462440	356130	331.5	292.5	258.5	293	7	8	8	7
PBANKA_0205200	conserved Plasmodium protein, unknown function	205200			214.96	1884	0	73.488	1	6	7	8	8	4.9	5.8	6.5	5.8	526470	668420	737960	726660	7326.8	5466.2	26320	7250.6	0.801122	9.47854	8.79208	7.18567	7.45132	144330	195380	209840	200470	331.5	292.5	258.5	248.5	7	8	8	8
PBANKA_0929600	nucleolar protein 56	NOP56			57.645	499	0	120.88	1	7	7	7	5	18.6	18	19.2	15.4	2321500	2025900	1623500	1583500	63338	92860	302170	64940	0.837141	12.5904	12.8785	10.7068	10.6143	857510	907860	808480	581930	331.5	292.5	258.5	416.5	7	8	8	5
PBANKA_1424300	NPL domain-containing protein	1424300			32.586	284	0	75.241	1	7	7	7	6	25.7	25.7	24.3	21.8	3899800	3501000	1899600	2529200	252920	389980	1183000	189960	0.84094	14.5879	14.9488	12.6758	12.1628	1010700	820120	801800	698390	331.5	292.5	299	350.5	7	8	7	6
PBANKA_1022100	conserved Plasmodium protein, unknown function	1022100			110.04	918	0	172.98	1	6	7	4	3	9.9	11	6.5	4.6	586390	714530	186820	258200	5269.4	11967	34016	3812.6	0.743954	9.00299	9.92253	7.55572	6.52399	137540	133420	95874	133070	331.5	292.5	499	625	7	8	4	3
PBANKA_1301400	proteasome subunit alpha type-1	PMSA1			28.894	253	0	226.17	1	7	9	9	10	41.5	51.4	51.4	55.7	2562600	3324700	3490400	3786200	263380	180730	926890	247650	0.873045	14.6464	13.8392	12.3238	12.5454	926720	903230	1047500	1074700	331.5	255.5	161	118.5	7	9	11	13
PBANKA_0107100	proteasome subunit alpha type-2	PMSA2			26.445	235	0	125.6	1	4	7	8	8	23.8	44.3	51.1	50.6	1986500	2810400	2295200	2844200	141420	118050	514990	119520	0.851572	13.7492	13.2248	11.476	11.4943	813600	921510	905340	1051200	331.5	255.5	221.5	160.5	7	9	9	11
PBANKA_1306200	tRNA import protein tRIP	tRIP			46.173	403	0	121.85	1	7	8	8	5	22.1	24.6	24.8	16.9	1814600	2641800	1524400	1468500	58739	69890	293590	59284	0.847611	12.4816	12.4686	10.6652	10.4828	832010	811450	634940	579720	331.5	255.5	258.5	293	7	9	8	7
PBANKA_1322700	ATP-dependent RNA helicase DBP5	DBP5			77.265	678	0	248.21	1	7	8	6	8	15	17	13.6	17.1	1701000	1642400	1037700	1700500	36579	34134	124740	19963	0.789517	11.7983	11.4347	9.43036	8.91248	408800	476320	400160	499080	331.5	255.5	349.5	248.5	7	9	6	8
PBANKA_1358700	conserved Plasmodium protein, unknown function	APC4			110.15	935	0	75.457	1	7	7	5	5	12.5	10.4	7.1	6.5	780340	714770	246330	402290	7888.1	13714	39226	4829.9	0.742307	9.58503	10.1191	7.76132	6.86521	216300	153100	107060	122840	331.5	255.5	416.5	416.5	7	9	5	5
PBANKA_1036000	transcription elongation factor SPT6	SPT6			291.28	2437	0	99.609	1	7	8	5	6	4	4.1	2.8	3.9	829560	746900	211450	754800	6861.8	7541.5	23116	1922.3	0.672437	9.38394	9.25639	6.9984	5.53605	201730	198870	135070	253330	331.5	255.5	416.5	350.5	7	9	5	6
PBANKA_0611600	ribonucleoside-diphosphate reductase large subunit	RRM1			97.051	847	0	129.06	1	7	9	5	7	12.3	14.4	7.7	11.9	688380	992290	541450	648330	12259	11062	49635	11050	0.806784	10.2211	9.80908	8.10087	8.05919	175750	215080	206750	185870	331.5	255.5	416.5	293	7	9	5	7
PBANKA_1120100	tetratricopeptide repeat protein	1120100			150.46	1292	0	30.189	1	7	7	3	6	7.5	7.4	3.9	7.3	681390	592050	356950	733710	7942.5	8402.1	26911	3610	0.718827	9.59495	9.41229	7.2177	6.44522	186810	169190	192470	269820	331.5	255.5	607	350.5	7	9	3	6
PBANKA_1120800	signal recognition particle subunit SRP68	SRP68			83.827	703	0	69.375	1	6	10	4	8	11.7	16.8	5.8	12.8	878500	1592800	420650	770740	14285	13649	63932	6098	0.762263	10.4418	10.1123	8.46605	7.20155	258080	349500	181670	226710	331.5	220.5	349.5	219.5	7	10	6	9
PBANKA_1127800	DnaJ protein	DnaJA			44.229	379	0	101.85	1	6	8	5	4	23.2	28.5	15	15.3	626760	1025100	464850	459890	18717	25170	105400	19571	0.827935	10.8316	10.9952	9.18731	8.88386	407720	432980	355820	373530	331.5	220.5	416.5	416.5	7	10	5	5
PBANKA_1302800	thioredoxin peroxidase 1	TPx1			21.654	195	0	118.99	1	7	10	11	7	42.1	63.1	66.7	43.1	2670200	4192100	4426400	4187800	299130	190730	1086400	301980	0.883032	14.83	13.9169	12.5529	12.8315	867250	903200	1336900	1145300	331.5	191.5	92.5	293	7	11	15	7
PBANKA_1008200	cGMP-dependent protein kinase	PKG			97.9	856	0	80.274	1	7	11	9	6	13.7	19.4	15.3	10.5	1134400	1538400	946940	941070	16561	18482	82537	18939	0.833357	10.6551	10.5496	8.83455	8.83651	427070	501950	410840	462210	331.5	191.5	221.5	350.5	7	11	9	6
PBANKA_0811600	selenide water dikinase	811600			116.88	1010	0	102.06	1	6	11	3	3	9.1	15.2	4.8	4.8	825910	1261900	557760	387180	5956.5	12058	45472	8581	0.819789	9.17982	9.93346	7.97449	7.69436	392670	413530	311120	213370	331.5	166.5	607	625	7	12	3	3
PBANKA_0410300	26S proteasome regulatory subunit RPN12	RPN12	expression		35.62	303	0	49.897	1	7	4	6	5	31.4	20.1	27.4	23.1	1247800	881580	1053100	896020	37030	41898	150830	49921	0.846805	11.816	11.7304	9.70436	10.2348	286650	371790	296080	350800	285	563.5	349.5	416.5	8	4	6	5
PBANKA_1416300	40S ribosomal protein S19	RPS19	ribosome		16.876	145	0	44.499	1	8	5	4	6	50.3	37.2	24.1	46.2	3510200	2890500	1856900	2090800	229120	398500	1207700	257480	0.860048	14.4453	14.98	12.7056	12.6015	2221100	2375400	1577500	1483600	285	473	499	293	8	5	4	7
PBANKA_1338300	60S ribosomal protein L6	RPL6	ribosome		21.646	190	0	287.42	1	7	5	6	5	48.4	44.7	35.3	40.5	11070000	7974400	6747000	5040700	273340	795510	2079100	470970	0.878895	14.6999	15.9773	13.4893	13.4727	2979100	2364500	2230800	2566500	285	396.5	221.5	350.5	8	6	9	6
PBANKA_1013100	60S ribosomal protein L14	RPL14	ribosome		17.924	156	0	146.71	1	7	5	5	6	43.6	34.6	29.5	39.1	10039000	7883800	6966900	6430900	918700	1425500	4452300	987040	0.87557	16.4488	16.8188	14.5879	14.5402	4305600	3252100	3795800	3439700	285	396.5	299	350.5	8	6	7	6
PBANKA_1028300	serine/threonine protein phosphatase PP1	PP1			34.963	304	0	108.35	1	8	6	7	7	38.2	33.9	33.6	37.2	1138600	957480	856770	1019700	36537	46194	163320	45476	0.841623	11.7966	11.8712	9.81914	10.1003	292950	284930	291430	364780	285	396.5	299	293	8	6	7	7
PBANKA_0906900	DnaJ domain-containing protein	DNAJC7			273.17	2336	0	56.384	1	8	6	6	3	5.2	3.5	4.1	1.8	797280	639860	491960	219890	1151.4	5788.2	15940	3800.8	0.827734	6.80874	8.87466	6.46216	6.51952	186940	193520	161520	163420	285	396.5	349.5	625	8	6	6	3
PBANKA_0214000	dynein heavy chain	DHC1	KT_spindle_MTOC		587.78	5058	0	80.364	1	8	6	6	9	2	1.9	1.5	2.4	534310	266160	347450	652220	2218.4	1817.4	6065.1	1181.8	0.661995	7.75487	7.20342	5.06811	4.8342	135630	139190	212460	216500	285	396.5	349.5	191	8	6	6	10
PBANKA_0942700	chromatin remodeling protein	SNF2L	DNA replication & repair		156.01	1330	0	92.147	1	8	6	5	9	8.2	6.5	5.3	10.4	768840	540640	295060	509720	7390.9	11649	31702	4470.6	0.733313	9.4911	9.88368	7.45408	6.75369	166120	209110	112020	139990	285	396.5	416.5	219.5	8	6	5	9
PBANKA_1142100	conserved Plasmodium protein, unknown function	1142100			399.66	3350	0	86.196	1	6	6	4	2	2.8	2.5	1.8	0.8	601270	451710	311080	158510	473.76	2151.2	5363.5	1220.8	0.753168	5.52758	7.44668	4.89075	4.88105	139070	157270	155140	160390	285	396.5	499	784	8	6	4	2
PBANKA_1239200	ribosome-interacting GTPase 1	RBG1			40.644	365	0	95.248	1	5	5	3	4	20.3	21.4	13.2	17.5	1600400	1494800	624130	1145300	41534	55409	163940	15319	0.761142	11.9816	12.1336	9.8246	8.53047	530850	487470	467650	502890	285	396.5	607	505	8	6	3	4
PBANKA_1027000	serine palmitoyltransferase	1027000			65.08	569	0	57.745	1	7	5	2	0	17	12.8	4.7	0	1276900	1079600	61013	0	0	48712	88168	0	0.625071	2.42947	11.9477	8.92976	0.0570215	320700	259610	31659	0	285	396.5	763	1090.5	8	6	2	0
PBANKA_1462700	THO complex subunit 2	1462700			261.05	2190	0	62.638	1	8	6	2	5	4.8	3.6	1.5	3.4	441180	359180	67991	230080	1966.5	3770.7	9388.3	581.12	0.600389	7.58098	8.25637	5.69844	3.81013	112010	84764	66489	64198	285	396.5	763	416.5	8	6	2	5
PBANKA_1306800	Sec7 domain-containing protein ARFGEF	1306800			352.94	2996	0	79.472	1	8	6	2	0	3.6	2.8	1	0	706550	502390	83375	0	0	4368.9	7864.5	0	0.534824	2.15737	8.46881	5.44294	0.240208	175280	148230	0	0	285	396.5	763	1090.5	8	6	2	0
PBANKA_1242700	AP-1/2 complex subunit beta	AP1B			107.2	936	0	76.209	1	8	7	8	8	11.1	10.9	12.2	11.8	940040	882110	962220	942830	17198	15750	68994	18971	0.828164	10.7095	10.3188	8.57598	8.83894	229350	249800	297550	287330	285	336	187	248.5	8	7	10	8
PBANKA_0941800	histone H2B	H2B			13.257	118	0	58.603	1	4	4	4	5	44.1	37.3	37.3	50	2884700	2841500	5238600	5763700	720460	360590	2068000	634820	0.885276	16.0981	14.8358	13.4816	13.9034	1812900	1232800	3344400	3003800	285	336	221.5	248.5	8	7	9	8
PBANKA_1340300	phosphoribosylpyrophosphate synthetase	1340300			48.215	430	0	59.674	1	7	6	7	4	22.8	19.1	23	13	1655500	1562400	1328700	1168700	43568	65068	229800	60397	0.85278	12.0506	12.3654	10.3118	10.5096	541410	535990	598900	491540	285	336	258.5	416.5	8	7	8	5
PBANKA_1039600	26S proteasome regulatory subunit RPN6	RPN6	expression		73.145	622	0	74.471	1	8	7	7	9	17	17	15.1	17.2	1655200	1830600	1497700	1753800	46871	45259	186410	42793	0.83435	12.156	11.8417	10.0099	10.0125	552790	609310	543320	672870	285	336	299	191	8	7	7	10
PBANKA_0312400	DNA-directed RNA polymerase II subunit RPB2	RPB2			148.25	1312	0	80.781	1	7	6	4	2	7.1	6.6	4.7	2.3	566580	649200	235590	217780	2493.3	5951.8	17268	1953.1	0.720774	7.92341	8.91487	6.57761	5.55898	189100	212370	117110	135520	285	336	499	625	8	7	4	3
PBANKA_1207000	nucleolar protein 5	NOP5			53.172	469	0	80.166	1	8	6	4	3	23.2	17.5	10	7.9	2700100	2577600	1443600	1419100	52558	98221	297640	53468	0.831418	12.3212	12.9595	10.685	10.3338	1231700	1233100	1022500	1224300	285	336	499	625	8	7	4	3
PBANKA_0607400	protein phosphatase PPM11	PPM11			162.05	1405	0	168.42	1	8	8	15	15	8.2	7.3	13.6	15.2	1215800	1262200	2422900	3653800	53069	20263	134090	39721	0.844562	12.3352	10.6823	9.53464	9.90505	490120	457680	898390	752720	285	292.5	60.5	80.5	8	8	18	16
PBANKA_1355100	40S ribosomal protein S6	RPS6	ribosome		35.469	310	0	259.05	1	6	7	6	5	27.1	30.3	27.1	23.2	7927200	9339700	6780700	6620400	703740	824140	3211200	705570	0.877847	16.0643	16.0283	14.1165	14.0559	2886800	3301500	2974200	3046500	285	292.5	187	219.5	8	8	10	9
PBANKA_1018600	60S ribosomal protein L21	RPL21	ribosome		18.713	161	0	188.18	1	8	7	8	7	52.2	46.6	52.2	47.8	11580000	8805000	7544300	5881400	832880	1654200	4795800	1069300	0.880328	16.3073	17.0335	14.6951	14.6557	4635400	3763300	3904000	3673200	285	292.5	221.5	248.5	8	8	9	8
PBANKA_1209000	eukaryotic translation initiation factor 2 subunit beta	eIF2beta			25.493	224	0	139.8	1	8	8	8	8	33.9	34.4	34.4	36.2	1647900	1950300	1655500	1630500	95682	89477	403690	104680	0.862257	13.1855	12.825	11.1247	11.3031	660980	656970	710300	615110	285	292.5	258.5	219.5	8	8	8	9
PBANKA_1033900	40S ribosomal protein S8e	RPS8	ribosome		24.993	218	0	175.68	1	6	6	6	6	34.4	34.4	31.2	31.2	15025000	14662000	11520000	10803000	1315200	1832600	6300000	1389200	0.88211	16.9664	17.1812	15.0887	15.0333	5329200	5406300	4911200	4420000	285	292.5	299	293	8	8	7	7
PBANKA_1023500	eukaryotic translation initiation factor 3 subunit H	EIF3H			55.077	470	0	323.31	1	7	8	7	6	22.1	26.6	21.7	22.8	3038600	2590000	1501700	1400600	18854	88802	179540	27498	0.81713	10.8422	12.8141	9.95574	9.37447	1232800	1204500	928440	929850	285	292.5	299	293	8	8	7	7
PBANKA_0418000	ATP-dependent RNA helicase DDX60	DDX60			288.79	2420	0	106.21	1	8	8	9	7	4	4.2	4.2	3.6	1236400	1253900	623330	739070	5061.2	6133.4	22897	3808	0.754447	8.94483	8.95823	6.98467	6.52225	234350	245560	250690	175880	285	255.5	221.5	293	8	9	9	7
PBANKA_1204900	conserved Plasmodium protein, unknown function	1204900			33.886	287	0	189.87	1	8	9	7	6	32.8	35.9	33.1	27.9	2454700	2676100	3102200	1736000	106390	149230	613440	192630	0.888845	13.3386	13.5629	11.7284	12.1829	1402600	1270600	1297200	1179800	285	255.5	258.5	293	8	9	8	7
PBANKA_1211000	GMP synthase [glutamine-hydrolyzing]	GMPS			62.69	544	0	104.94	1	8	9	7	8	16.2	18.6	13.6	16.2	2097500	1765200	2031600	1991900	68686	72327	271940	70054	0.843532	12.7073	12.518	10.5547	10.7236	746330	678120	772910	709450	285	255.5	299	248.5	8	9	7	8
PBANKA_0823900	DNA-directed RNA polymerase II subunit RPB3	RPB3			38.594	335	0	82.743	1	8	9	4	7	32.2	34.6	11.6	26	983820	1286900	421360	693310	35509	52137	173140	24786	0.803657	11.7555	12.0458	9.90338	9.22467	306850	339040	270670	226770	285	255.5	499	293	8	9	4	7
PBANKA_1460400	peptidyl-prolyl cis-trans isomerase FKBP35	FKBP35			35.023	306	0	80.579	1	7	10	8	9	23.5	38.9	29.1	32.4	1042700	2042200	1966200	1373600	60681	44332	278110	88197	0.889181	12.5285	11.8118	10.5871	11.0559	415350	436210	529250	347480	285	220.5	221.5	191	8	10	9	10
PBANKA_1427700	RuvB-like helicase 1	RUVB1			57.85	507	0	87.261	1	6	8	4	3	17.2	23.3	12.4	9.1	842480	1127200	352230	319580	9043	25834	82193	10478	0.807644	9.78216	11.0327	8.82852	7.98251	216360	224070	138570	162770	285	220.5	416.5	625	8	10	5	3
PBANKA_1317900	conserved Plasmodium protein, unknown function	1317900			162.48	1368	0	76.391	1	8	10	4	3	8.3	10.6	4.9	3.7	864000	881850	297260	202440	2735.7	11237	29430	4017	0.779593	8.05726	9.83173	7.3468	6.59934	246380	202850	131680	96423	285	191.5	499	625	8	11	4	3
PBANKA_1325600	valine--tRNA ligase	ValRs	expression		126.1	1077	0	127.95	1	7	10	2	11	9.1	13	2.3	15.7	681230	990260	114450	777920	9064.2	8923.6	32578	746.84	0.604909	9.78553	9.49917	7.49341	4.17209	162920	209960	31937	182390	285	191.5	607	136.5	8	11	3	12
PBANKA_0706800	DnaJ protein	706800			75.395	646	0	129.98	1	8	11	10	11	15.6	21.4	16.7	25.1	1564800	2845300	1826400	1687700	41367	42639	214170	50656	0.862405	11.9758	11.7556	10.2102	10.2559	582870	572110	602860	603230	285	166.5	187	160.5	8	12	10	11
PBANKA_0619900	Obg-like ATPase 1	OLA1			45.32	393	0	157.6	1	7	9	9	8	24.7	29.8	31.6	27.2	1882500	1923000	1607700	1854700	43143	38670	154060	30817	0.814922	12.0364	11.6147	9.73493	9.53887	391100	348850	462690	447800	285	166.5	221.5	191	8	12	9	10
PBANKA_0933400	GTPase-activating protein	933400			44.472	372	0	173.84	1	7	10	7	7	23.4	30.6	23.1	22	1900200	2931500	1651300	2489200	118450	91039	427610	80082	0.839843	13.4935	12.85	11.2077	10.9166	620760	806800	661200	832920	285	166.5	299	219.5	8	12	7	9
PBANKA_1445400	protein transport protein SEC13	SEC13			76.699	687	0	91.961	1	7	10	6	3	14.4	23.3	11.2	5.8	581990	955740	343940	164290	4418.3	15671	50276	9841.2	0.840036	8.74885	10.3116	8.11938	7.89205	137410	162520	100850	81599	285	145.5	299	625	8	13	7	3
PBANKA_1434100	dynamin-like protein	DRPC			130.47	1141	0	91.771	1	8	14	6	3	9.8	15.9	7.3	3.3	721420	1653400	456620	267880	3882.4	8452	41554	6617.7	0.843237	8.5623	9.42083	7.8445	7.31955	215890	353780	162740	141020	285	126	349.5	625	8	14	6	3
PBANKA_1446500	asparagine-rich protein	1446500			198.2	1757	0	323.31	1	8	16	8	11	6.8	12.9	6.7	8.4	1917700	2497800	1090200	1515400	17551	19863	77248	11795	0.789642	10.7388	10.6536	8.73901	8.15332	463230	436720	282590	382350	285	94	258.5	160.5	8	16	8	11
PBANKA_1204400	DNA/RNA-binding protein Alba 3	ALBA3			11.991	107	0	93.73	1	5	4	5	5	49.5	32.7	50.5	50.5	4659500	2798700	4874600	4654900	386900	495510	1740000	560010	0.883901	15.2012	15.2943	13.2325	13.7225	2742400	2111300	3109400	2712000	243.5	563.5	258.5	350.5	9	4	8	6
PBANKA_1111400	inositol-3-phosphate synthase	INO1			69.671	607	0	45.763	1	9	4	5	6	18.9	8.4	9.6	13.3	1135700	287730	502490	661630	23630	40561	92413	17946	0.777036	11.1679	11.6836	8.9976	8.75881	234690	146780	220950	190980	243.5	563.5	416.5	350.5	9	4	5	6
PBANKA_0713100	rhoptry neck protein 5	RON5			131.89	1148	0	35.806	1	8	5	1	2	9.1	5.1	0	2.4	646520	373600	0	151410	2226.6	9247.1	0	1168.1	0.281687	7.7602	9.55054	0.0588251	4.81738	243260	184110	0	115710	243.5	473	1001	784	9	5	0	2
PBANKA_1401300	40S ribosomal protein S7	RPS7	ribosome		22.481	194	0	249.93	1	7	5	8	8	42.8	33	47.4	43.3	5145700	6008500	5804800	4199800	391090	489170	1985100	543550	0.888812	15.2167	15.2757	13.4226	13.6795	2297600	2517400	2905300	2501700	243.5	396.5	120.5	160.5	9	6	13	11
PBANKA_0819900	nucleosome assembly protein	NAPS			31.688	267	0	66.629	1	8	6	9	6	25.8	22.1	28.5	25.5	2642400	2445000	3184300	2194400	146290	176160	696590	211140	0.87778	13.798	13.8023	11.9117	12.3153	1275000	1147400	1756900	1612300	243.5	396.5	161	248.5	9	6	11	8
PBANKA_0943600	60S acidic ribosomal protein P1	RPP1	ribosome		12.898	119	0	277.81	1	6	6	5	6	77.3	80.7	63.9	69.7	6389300	5479200	3332800	3634900	418680	725630	2239200	459840	0.867613	15.3151	15.8446	13.5963	13.4382	1863800	1582400	1216500	1650300	243.5	336	258.5	293	9	7	8	7
PBANKA_1365500	exported protein IBIS1	IBIS1			37.407	327	0	125.29	1	9	7	8	9	34.9	29.1	32.7	34.9	1916600	1582000	2541600	3298200	126390	76035	363480	98683	0.847732	13.5871	12.5901	10.9733	11.2179	569690	451790	992580	1073000	243.5	336	258.5	160.5	9	7	8	11
PBANKA_0212100	eukaryotic translation initiation factor 2 subunit alpha	eIF2alpha			37.376	326	0	45.842	1	8	6	6	8	25.5	18.4	19.9	29.1	2617300	2175300	2201900	2147000	77537	100230	336390	83019	0.843812	12.8822	12.9887	10.8616	10.9686	852470	738580	878900	837780	243.5	336	299	219.5	9	7	7	9
PBANKA_1303700	vesicle-associated membrane protein	VAMP			26.902	234	0	74.046	1	8	7	6	8	49.1	39.7	37.6	49.1	2959600	2294200	1645800	1984400	94978	135410	419530	78989	0.830037	13.1749	13.4227	11.1802	10.8968	1197800	986430	880050	898900	243.5	336	349.5	219.5	9	7	6	9
PBANKA_1028400	60S ribosomal protein L10	RPL10	ribosome		25.246	219	0	60.285	1	8	7	5	7	32.4	29.7	21.9	29.2	2404500	2108700	1282000	1508300	150830	240450	730350	128200	0.839187	13.8421	14.2511	11.98	11.5955	919120	766160	772100	697350	243.5	336	416.5	293	9	7	5	7
PBANKA_0414600	40S ribosomal protein S15A	RPS15A	ribosome		14.928	130	0	118.42	1	5	5	5	4	35.4	30.8	30.8	30	7964800	7033000	5820900	5657400	611850	838850	2735600	569560	0.865772	15.8624	16.0538	13.8852	13.7469	2978400	2229700	2503000	2304200	243.5	292.5	187	248.5	9	8	10	8
PBANKA_1365200	thioredoxin-related protein	TXNDC5			23.633	206	0	31.446	1	7	6	6	5	32.5	28.6	28.6	28.6	4389300	3123800	4341700	4663800	241090	232440	795390	203750	0.848402	14.5188	14.2023	12.1031	12.2639	1865700	1541500	2367600	2450500	243.5	292.5	299	350.5	9	8	7	6
PBANKA_0924900	eukaryotic peptide chain release factor GTP-binding subunit	ERF3			59.974	532	0	79.981	1	8	7	6	7	20.5	16.9	14.5	22.2	2339500	2321100	1721400	1443100	26170	54522	164170	35347	0.835131	11.3152	12.1103	9.82663	9.73673	596010	591110	540530	540640	243.5	292.5	299	293	9	8	7	7
PBANKA_1222100	regulator of chromosome condensation	1222100			74.255	650	0	46.924	1	9	6	7	6	20.6	14.8	17.2	12.6	988890	740430	795920	661910	8120.8	17776	46116	14368	0.816723	9.62698	10.4934	7.99478	8.43801	276810	291280	320630	237860	243.5	292.5	299	350.5	9	8	7	6
PBANKA_0827500	glutamine-dependent NAD(+) synthetase	NADSYN			101.53	876	0	52.485	1	9	7	6	6	14.5	12.1	9.2	8.4	1162100	1158800	951250	815320	16577	20364	68313	15306	0.800663	10.6565	10.6895	8.56167	8.52924	379400	357360	343100	359070	243.5	292.5	349.5	350.5	9	8	6	6
PBANKA_0922500	kelch domain-containing protein	922500			63.44	555	0	128.85	1	9	8	4	6	18	16.6	8.6	14.4	1490200	1667000	765080	699790	23432	53266	163690	28336	0.82816	11.1558	12.0767	9.8224	9.41778	398630	408350	281320	254410	243.5	292.5	499	350.5	9	8	4	6
PBANKA_1310400	centrin-2	CEN2			19.369	168	0	308.49	1	8	8	8	6	53	53	53	46.4	9678400	8333000	5743300	5996100	413770	682780	2122800	422090	0.864082	15.298	15.7568	13.5193	13.3146	2759600	2067300	1759100	2121000	243.5	255.5	221.5	293	9	9	9	7
PBANKA_0401100	serine/threonine protein kinase	SRPK1			153.65	1306	0	47.613	1	9	8	9	6	7.4	7.3	8.4	6.6	636070	691480	613210	342550	4334.7	8166.2	27535	7100.8	0.810943	8.72129	9.37121	7.25077	7.4212	118340	124580	140690	130640	243.5	255.5	221.5	350.5	9	9	9	6
PBANKA_1452600	calcyclin binding protein	1452600			26.602	226	0	65.185	1	9	9	9	5	46	37.6	45.6	26.5	3362200	3280900	2682100	2311200	141810	208120	717480	166440	0.860788	13.7532	14.0428	11.9544	11.9721	1296200	1248600	1177800	1135200	243.5	255.5	221.5	350.5	9	9	9	6
PBANKA_0807600	40S ribosomal protein S11	RPS11	ribosome		18.72	161	0	99.954	1	7	8	6	7	39.8	46	34.8	39.8	10581000	10818000	7548700	5670300	491760	850900	2837800	601470	0.877999	15.5472	16.0744	13.9381	13.8256	2387700	2144200	2130000	1598200	243.5	255.5	299	248.5	9	9	7	8
PBANKA_1010800	CCR4-associated factor 16	CAF16			29.681	257	0	214.66	1	9	8	7	9	44.7	37.7	32.7	44.7	2529200	2347300	1633500	1552700	60812	109880	332310	70916	0.841432	12.5316	13.1213	10.844	10.7413	795330	636790	592810	466370	243.5	255.5	299	191	9	9	7	10
PBANKA_1131900	serine/threonine protein phosphatase 5	PP5			82.454	711	0	85.763	1	9	9	6	7	15.3	15.3	11	12.5	1450400	1765900	1028900	1051700	23901	32964	120390	23385	0.8206	11.1844	11.3844	9.37915	9.14073	441500	514630	395200	452160	243.5	255.5	349.5	293	9	9	6	7
PBANKA_0510900	40S ribosomal protein S2	RPS2	ribosome		29.744	263	0	257.24	1	9	9	10	10	49.4	52.5	52.5	53.2	5847100	7342200	7423200	7281400	212140	221030	927700	242510	0.872693	14.3342	14.1296	12.3251	12.5151	2151900	1865400	2303500	2054800	243.5	220.5	161	160.5	9	10	11	11
PBANKA_0514500	26S proteasome regulatory subunit RPN9	RPN9	expression		46.323	390	0	247.07	1	8	8	10	7	25.4	23.6	28.2	21.8	3011600	3148700	2562600	2271300	112410	152940	550190	128900	0.857803	13.418	13.5984	11.5714	11.6033	1004000	976510	1000700	1003200	243.5	220.5	187	293	9	10	10	7
PBANKA_0523100	eukaryotic initiation factor 4A-III	EIF4A3	expression		44.683	390	0	81.274	1	9	9	10	5	31.8	33.8	35.9	21.3	1065700	1066100	1073000	609310	21286	46334	151790	43019	0.862004	11.0172	11.8755	9.71351	10.0201	404390	365910	370840	424680	243.5	220.5	187	416.5	9	10	10	5
PBANKA_0912100	casein kinase 1	CK1			37.672	323	0	64.652	1	8	10	7	8	26	33.7	24.5	25.1	3950200	3699600	3028000	3102400	166910	204310	727110	164120	0.854344	13.9883	14.0162	11.9736	11.9518	1153400	950380	1273600	1095300	243.5	220.5	221.5	219.5	9	10	9	9
PBANKA_1404900	26S protease regulatory subunit 10B	RPT10B	expression		44.721	393	0	109.34	1	9	9	8	6	34.9	36.1	35.1	26	2185000	2440500	1471800	1804800	72348	99014	321300	58012	0.825014	12.7822	12.9711	10.7954	10.4515	798690	955950	698080	890420	243.5	220.5	221.5	293	9	10	9	7
PBANKA_1205000	G-strand-binding protein 2	GBP2			27.843	233	0	263.62	1	6	7	6	7	38.2	42.1	35.2	42.1	8161300	7590400	5624300	6066300	541570	727130	2453400	505370	0.865814	15.6864	15.8476	13.7281	13.5744	2366600	1943900	1640800	1922500	243.5	220.5	258.5	191	9	10	8	10
PBANKA_0702800	protein disulfide-isomerase	702800			55.41	482	0	157.01	1	7	10	8	11	20.5	28.4	23	30.7	2922900	3859300	4141600	4940100	149330	100790	496480	128850	0.858393	13.8277	12.9968	11.4232	11.6028	959860	1059400	1490000	1535400	243.5	220.5	258.5	136.5	9	10	8	12
PBANKA_0502200	26S proteasome regulatory subunit p55	RPN5	expression		55.277	467	0	323.31	1	8	9	8	8	22.7	26.3	23.3	23.6	4121200	4967100	3092800	4108000	174360	174640	689180	127940	0.843677	14.0513	13.7898	11.8963	11.5925	931710	959780	963780	1001800	243.5	220.5	258.5	219.5	9	10	8	9
PBANKA_0942900	phenylalanine--tRNA ligase beta subunit	FRS1beta			72.639	625	0	168.59	1	7	11	11	11	16	27.5	25.3	27.5	1294600	1359700	1267500	1564400	30924	29767	115310	27723	0.82056	11.556	11.2372	9.31695	9.38623	334800	388820	369130	396900	243.5	191.5	120.5	103	9	11	13	14
PBANKA_1351900	60S ribosomal protein L6	RPL6	ribosome		26.743	231	0	323.31	1	8	7	7	9	36.4	27.7	35.1	39.8	9809400	9519900	8486800	7203400	687880	897190	3276200	808690	0.882415	16.0314	16.1508	14.1454	14.2527	2983500	2336600	2446000	2321000	243.5	191.5	221.5	136.5	9	11	9	12
PBANKA_0715900	ubiquitin carboxyl-terminal hydrolase 13	USP13			99.619	863	0	131.33	1	9	11	8	11	12.3	17.4	12.6	14.6	1164900	1735000	1244700	999320	17856	20679	95944	23621	0.847806	10.7637	10.7116	9.0517	9.15522	453200	341580	385920	407460	243.5	191.5	258.5	160.5	9	11	8	11
PBANKA_1423500	60S ribosomal protein L13-2	RPL13-2	ribosome		25.418	215	0	90.708	1	8	8	6	7	38.1	40	32.6	34.4	2571400	3534800	1335100	1920200	134260	168550	612480	87557	0.830687	13.6742	13.7386	11.7261	11.0454	672770	799850	476270	485560	243.5	191.5	349.5	248.5	9	11	6	8
PBANKA_1455100	replication factor C subunit 4	RFC4	DNA replication & repair		37.671	336	0	257.09	1	9	11	10	7	40.8	49.7	44	26.5	1790100	2464000	2538800	2169300	94221	78238	390510	111080	0.870935	13.1633	12.6313	11.0768	11.3887	532660	624880	936310	925300	243.5	166.5	140.5	293	9	12	12	7
PBANKA_0501300	DNA polymerase delta catalytic subunit	POLD-A	DNA replication & repair		126.55	1097	0	186.68	1	9	12	11	11	11.3	14.7	12.7	13.6	924510	1235700	1146000	1253600	17297	12786	63041	15912	0.821335	10.7178	10.018	8.4458	8.58526	244980	251350	322700	357790	243.5	166.5	161	160.5	9	12	11	11
PBANKA_1206600	26S protease regulatory subunit 4	RPT4	expression		49.709	447	0	195.41	1	8	8	8	7	30.9	30.9	30.9	26.4	2521800	2990100	2329900	2155200	56030	54478	228400	52878	0.840889	12.4135	12.1091	10.303	10.3178	657910	678790	704970	618960	243.5	166.5	187	219.5	9	12	10	9
PBANKA_0831000	merozoite surface protein 1	MSP1			198.67	1791	0	233.55	1	9	13	14	17	8.6	11.3	11.9	14.6	1729100	1497500	3061900	3894200	41788	19283	110130	32509	0.834763	11.9904	10.6108	9.25064	9.61599	345730	294540	700290	727040	243.5	145.5	92.5	68.5	9	13	15	17
PBANKA_1003800	V-type proton ATPase subunit B	1003800			55.828	494	0	126.67	1	8	12	9	12	25.5	39.3	28.1	34.6	2123500	2610000	2176900	2625600	86239	77643	332450	73323	0.843235	13.0356	12.6203	10.8446	10.7894	578130	588820	631220	740030	243.5	145.5	187	118.5	9	13	10	13
PBANKA_1231500	ubiquitin carboxyl-terminal hydrolase 2	USP2			142.4	1218	0	138.16	1	9	13	8	8	8.9	12.5	8	8.1	1285000	2066300	727220	1213800	18116	19180	78739	10602	0.783915	10.7845	10.6031	8.76659	7.99948	466660	498840	334010	411060	243.5	145.5	258.5	248.5	9	13	8	8
PBANKA_1309700	ATP-dependent RNA helicase DDX17	DDX5			59.104	522	0	121.27	1	8	13	5	8	21.1	33.7	13	20.9	1921600	2976300	758840	2059500	62930	56691	232580	23385	0.786738	12.581	12.1666	10.3292	9.14073	740510	591400	435580	528720	243.5	126	416.5	219.5	9	14	5	9
PBANKA_0937200	RNA-binding protein	937200			144.27	1242	0	138.12	1	9	15	13	8	9.1	17.6	16.8	8.2	947850	2082300	1376200	651710	10684	15539	72296	19225	0.861208	10.0227	10.2994	8.64342	8.85813	378360	416690	331280	246110	243.5	107	120.5	248.5	9	15	13	8
PBANKA_0918000	60S acidic ribosomal protein P0	RPP0	ribosome		34.86	315	0	205.2	1	7	10	9	9	33.7	43.2	42.5	40.3	5694500	7704500	5159400	5503600	181420	182470	824680	182360	0.867587	14.1085	13.8531	12.1553	12.1039	1460100	1535700	1320200	1395800	243.5	107	140.5	160.5	9	15	12	11
PBANKA_1437300	endoplasmin	GRP94			93.244	808	0	275.01	1	9	19	16	15	17.5	31.4	24.9	23.5	1059700	5531800	3840300	5395800	102970	22422	320890	79748	0.899845	13.2914	10.8284	10.7935	10.9106	206870	690180	600340	765680	243.5	65	51.5	56.5	9	20	19	18
PBANKA_0401800	lipin	401800			126.5	1093	0	58.93	1	9	3	2	3	13.3	4.1	2.4	4.1	765760	282680	167670	186680	3060.3	7852.6	16419	1343.8		8.21903	9.31471	6.50487	5.01954	227970	101980	0	96939	209.5	563.5	763	625	10	4	2	3
PBANKA_1453300	acyl-CoA synthetase	ACS11			87.002	754	0	47.68	1	9	6	7	9	15.9	10.6	12.2	16	1146000	770650	1218900	1571800	30271	22364	92471	24479	0.814555	11.5252	10.8246	8.99851	9.20669	175220	205980	271390	387130	209.5	396.5	258.5	191	10	6	8	10
PBANKA_0203000	chromatin assembly factor 1 subunit C	CAF1C			50.531	446	0	126.82	1	9	6	11	8	26.7	18.8	37	24.7	2525800	1079700	4800400	3658700	199730	145350	661000	259670	0.880371	14.2473	13.5249	11.8361	12.6138	588060	624250	1269000	1116600	209.5	336	120.5	191	10	7	13	10
PBANKA_1429700	W2 domain-containing protein	1429700			98.11	831	0	55.184	1	9	6	3	1	15.6	11.1	5.3	0	928600	760690	364680	0	1239.6	20063	44778	0		6.91523	10.668	7.9523	0.389221	282860	246970	183590	0	209.5	336	607	955	10	7	3	1
PBANKA_1026600	protein SEY1	SEY1			106.84	913	0	149.19	1	10	8	7	6	15.2	11.3	10	8.9	1867300	2133800	1327300	1056800	22686	40442	139110	28207		11.1091	11.6793	9.58766	9.4112	961640	1140200	900210	802530	209.5	292.5	258.5	350.5	10	8	8	6
PBANKA_1107300	nuclear protein localization protein 4	NPL4			60.477	516	0	83.692	1	10	8	6	3	25.6	22.1	16.3	8.3	992210	849160	477670	186210	6006.7	31106	74881	14165		9.19193	11.3007	8.69411	8.41748	220650	216220	227480	134660	209.5	292.5	299	625	10	8	7	3
PBANKA_1345800	RNA-binding protein	1345800			55.949	499	0	297.34	1	10	9	9	7	24.6	21	17	19.6	6081400	5376700	3933800	2956600	132090	272060	822610	178810		13.6507	14.4293	12.1516	12.0755	2066700	1709400	1550800	1085000	209.5	255.5	221.5	293	10	9	9	7
PBANKA_1456100	40S ribosomal protein S17	RPS17	ribosome		16.078	137	0	116.98	1	7	7	7	7	55.5	55.5	55.5	55.5	5558900	4836300	4193400	3604000	514860	783530	2569500	591690		15.6134	15.9554	13.7949	13.8019	1657100	1497500	1529900	1488500	209.5	255.5	258.5	293	10	9	8	7
PBANKA_0610200	DNA replication licensing factor MCM5	MCM5	DNA replication & repair		85.547	758	0	104.47	1	9	10	11	10	17.2	19.9	20.4	18.3	3051700	2151400	3679600	2111600	37544	65484	222870	77870	0.873335	11.8359	12.3746	10.2676	10.8762	1039300	997620	1197600	1419900	209.5	220.5	120.5	191	10	10	13	10
PBANKA_1426100	conserved protein, unknown function	1426100			72.001	609	0	163.05	1	8	8	6	8	18.9	19.9	13.5	18.1	1352000	1509500	881520	1071400	20231	20992	84879	16797	0.809067	10.9439	10.7333	8.87492	8.66335	292460	286740	279510	274170	209.5	220.5	258.5	191	10	10	8	10
PBANKA_1202400	60S ribosomal protein L13	RPL13	ribosome		23.767	202	0	89.289	1	7	8	7	7	34.7	34.7	31.2	31.7	8338100	7767800	5790400	5601900	464800	698800	2323000	491830		15.4658	15.7903	13.6494	13.5352	3183200	2702400	2619500	2516900	209.5	220.5	299	248.5	10	10	7	8
PBANKA_1145500	nuclear cap-binding protein subunit 1	NCBP1			125.55	1059	0	128.53	1	10	9	5	7	11.3	10.2	5.8	7.2	1105300	1095000	565240	555870	9209	18432	56121	9916.5		9.8084	10.5457	8.27805	7.90305	251130	235410	249850	235980	209.5	220.5	416.5	293	10	10	5	7
PBANKA_0922100	40S ribosomal protein S18	RPS18	ribosome		17.882	156	0	185.13	1	8	8	7	7	57.1	55.8	55.8	55.8	14297000	14014000	10910000	10815000	802480	1157600	3844000	791680		16.2537	16.5185	14.376	14.222	6379400	5515000	5872000	5917700	209.5	191.5	140.5	248.5	10	11	12	8
PBANKA_1340400	lactate dehydrogenase	LDH2			36.958	334	0	110.99	1	10	10	9	9	33.2	30.8	33.5	30.8	2811700	3191300	2806100	3130600	132370	133760	567520	142090	0.863304	13.6538	13.405	11.6161	11.7439	758330	782320	867660	864580	209.5	191.5	221.5	160.5	10	11	9	11
PBANKA_0912200	signal recognition particle subunit SRP72	SRP72			95.86	799	0	118.98	1	10	10	6	6	17.5	17.1	12.3	11	1270200	1397400	440660	408960	10056	30989	83619	9763		9.93534	11.2952	8.85334	7.88054	274170	231730	213270	154690	209.5	191.5	349.5	350.5	10	11	6	6
PBANKA_1360500	ethanolamine-phosphate cytidylyltransferase	ECT			64.061	559	0	70.254	1	7	10	4	8	17.4	25.4	12	20.2	1312200	1540300	295180	786770	25380	40535	120860	7556.8		11.271	11.6826	9.38477	7.51099	276190	291330	185430	228040	209.5	191.5	416.5	248.5	10	11	5	8
PBANKA_1105100	DNA mismatch repair protein MSH6	MSH6	DNA replication & repair		142.65	1232	0	89.674	1	10	12	17	14	8.6	12.6	17.4	14.6	1414600	1712100	2740100	2063700	27041	20208	108180	37782	0.864655	11.3624	10.6784	9.22487	9.83285	282150	289550	429460	403500	209.5	166.5	60.5	103	10	12	18	14
PBANKA_1329300	40S ribosomal protein S3	RPS3A	ribosome		24.736	222	0	248.04	1	10	10	7	8	48.6	52.7	41	44.6	18182000	22705000	13175000	14238000	937580	1209500	4493700	859050	0.875414	16.4782	16.5817	14.6013	14.3398	4124100	3777900	3608800	3619100	209.5	166.5	221.5	219.5	10	12	9	9
PBANKA_0913700	coatomer subunit delta	913700			57.497	494	0	67.079	1	9	9	7	7	23.3	26.1	16.2	19.6	3393300	3606700	1220000	1991500	53662	96848	285500	41825	0.814715	12.3512	12.9392	10.6249	9.97951	628670	544400	473950	425060	209.5	166.5	299	191	10	12	7	10
PBANKA_1449400	splicing factor 3B subunit 3	SF3B3			138.34	1218	0	84.727	1	9	11	7	8	10.8	11.7	7.7	8.6	1294500	1850000	1132000	1232600	19241	20306	86846	18653	0.82213	10.8715	10.6854	8.90797	8.81455	360270	357240	308740	354950	209.5	166.5	299	191	10	12	7	10
PBANKA_0941500	40S ribosomal protein S4	RPS4	ribosome		29.844	261	0	141.88	1	7	9	7	7	33.3	39.8	32.6	32.6	10412000	9370700	7092100	7364800	386720	515700	1713900	354390		15.2005	15.3519	13.2106	13.0624	2716100	2229800	2191400	2406300	209.5	145.5	221.5	219.5	10	13	9	9
PBANKA_0715600	26S protease regulatory subunit 6B	RPT3	expression		45.192	395	0	183.24	1	8	11	10	9	28.9	38	37	34.4	3006000	4241100	2908100	3347200	136040	115230	533160	114570	0.854041	13.6932	13.1899	11.526	11.4333	867870	843090	901110	966010	209.5	126	120.5	191	10	14	13	10
PBANKA_1232100	serine/arginine-rich splicing factor 1	SR1			36.273	315	0	153.23	1	8	10	9	10	27.6	33	29.5	31.1	6961200	7655300	6495400	7593900	563750	535480	2159000	483140	0.868469	15.7443	15.4062	13.5437	13.5095	3420800	3376900	3793200	3490000	209.5	126	161	90	10	14	11	15
PBANKA_0939600	polyadenylate-binding protein-interacting protein 1	PAIP1	expression		368.52	3296	0	278.22	1	10	18	10	12	4.6	8.2	4.6	5.5	2083900	2990900	1375900	1388300	5541.3	9484.7	34773	4691.1	0.772161	9.07558	9.58714	7.58748	6.82314	697660	687340	648770	583430	209.5	65	161	136.5	10	20	11	12
PBANKA_1426700	hydroxymethyldihydropterin pyrophosphokinase-dihydropteroate synthase	PPPK-DHPS			79.791	680	0	48.181	1	10	4	2	3	20.1	7.4	4.7	7.1	1222400	518530	157170	260890	6257.6	33136	58200	4490.6		9.25096	11.3919	8.33053	6.76013	295380	198250	89398	140310	183	473	763	625	11	5	2	3
PBANKA_0316000	replication factor C subunit 1	RFC1	DNA replication & repair		99.232	861	0	148.11	1	10	7	11	14	14.6	11.5	16.8	19.3	1764000	1249600	1616700	2823000	47234	25603	124750	30420		12.1671	11.0198	9.43048	9.52017	367220	412520	541120	532000	183	336	161	103	11	7	11	14
PBANKA_0505100	ADP-ribosylation factor 1	ARF1			20.862	181	0	101.59	1	9	7	8	10	59.7	50.3	61.3	68	2922000	2620400	3342100	4135000	313170	202950	969870	247360		14.8962	14.0065	12.3892	12.5437	812000	771460	1079600	1019900	183	336	221.5	136.5	11	7	9	12
PBANKA_1324400	60S ribosomal protein L27	RPL27	ribosome		16.864	146	0	43.61	1	8	6	7	9	48.6	42.5	42.5	45.9	11421000	8266400	7042700	7069100	709250	1170900	3400400	709840		16.0755	16.5349	14.1991	14.0646	3014700	2524500	2479100	2488100	183	336	258.5	191	11	7	8	10
PBANKA_1405100	V-type proton ATPase subunit H	1405100			53.947	455	0	99.783	1	10	5	6	5	29	16.7	20	17.1	661510	749900	565600	518970	16495	18665	72307	17301		10.6493	10.5638	8.64364	8.706	173500	190350	163220	163820	183	336	299	350.5	11	7	7	6
PBANKA_0814200	elongation factor 1-beta	EF-1beta			30.032	257	0	175.31	1	9	7	9	8	42	31.9	42	31.9	4426700	3375800	3352200	2526800	130340	245300	714650	175960		13.6315	14.2799	11.9487	12.0523	1150900	1065500	1054200	785610	183	292.5	187	191	11	8	10	10
PBANKA_0833600	importin alpha re-exporter	CSE1			153.3	1290	0	81.425	1	11	9	10	9	11.6	9.3	11.2	9.1	2649900	1846600	1522900	1554600	21592	32564	96809	17006		11.0378	11.3667	9.06465	8.68119	390550	383660	337130	383660	183	255.5	161	219.5	11	9	11	9
PBANKA_1301300	trailer hitch homolog	CITH			39.068	337	0	190.4	1	10	8	9	9	32.3	31.2	36.5	31.5	2992800	2848900	3823600	4441900	213030	146760	691120	191220		14.3403	13.5389	11.9004	12.1723	1306100	1146300	1919900	2095500	183	255.5	187	191	11	9	10	10
PBANKA_0913400	protein phosphatase PPM8	PPM8			66.193	577	0	139.36	1	10	8	7	6	24.1	22.7	19.6	19.1	1261100	921850	1000200	614780	8256.6	30589	87810	25280		9.6509	11.2765	8.92389	9.25314	241420	229640	265360	246460	183	255.5	187	293	11	9	10	7
PBANKA_0717800	60S ribosomal protein L15	RPL15	ribosome		24.082	205	0	125.53	1	5	7	6	5	26.3	37.1	33.7	26.3	12123000	8000700	9004200	7590000	798330	1222700	3815400	922160		16.2462	16.5974	14.3652	14.4421	5284900	3403900	4409000	2865600	183	255.5	221.5	219.5	11	9	9	9
PBANKA_1228200	glutamate dehydrogenase	GDH3			140.17	1212	0	68.701	1	11	8	4	6	11.1	9.3	3.8	6.2	1884000	2243700	681280	898420	14038	23890	83631	10645		10.4166	10.9199	8.85355	8.00532	484860	490230	410020	419680	183	255.5	499	350.5	11	9	4	6
PBANKA_1033800	conserved protein, unknown function	1033800			768.95	6521	0	98.91	1	11	8	2	3	2.4	1.6	0.4	0.7	586220	409840	63952	99796	214.52	1638.1	2940.5	196.77		4.38454	7.05357	4.02364	2.2478	139850	88675	20196	39982	183	255.5	763	505	11	9	2	4
PBANKA_1214700	conserved Plasmodium protein, unknown function	1214700			112.04	961	0	199.86	1	11	10	12	15	18.6	16.3	19.7	21.7	1901100	1869600	2173400	2704400	44487	29858	143540	36608		12.0807	11.2416	9.63289	9.78731	754000	738450	907170	932080	183	220.5	140.5	80.5	11	10	12	16
PBANKA_0914300	protein disulfide-isomerase	914300			49.213	423	0	138.52	1	10	9	10	10	25.8	24.8	26.5	28.6	2457300	3638500	2779600	3087600	98511	77332	382380	88418		13.2276	12.6145	11.0464	11.0595	1130100	1291200	1258800	1219200	183	220.5	187	191	11	10	10	10
PBANKA_1446800	60 kDa chaperonin	CPN60			79.832	707	0	185.07	1	11	10	10	10	22.6	18.8	22.3	22.6	1903400	2377300	1834300	3221300	101600	61399	297460	57777		13.2721	12.2817	10.6841	10.4456	871440	1093100	1049800	1257500	183	220.5	187	191	11	10	10	10
PBANKA_1365300	intron-binding protein aquarius	AQR			269.13	2255	0	65.949	1	11	10	10	7	6.7	6.6	6.2	4.7	1541800	1255700	885960	670200	4718.9	12848	34820	7383		8.84381	10.025	7.58942	7.47743	298630	311000	259850	248490	183	220.5	187	293	11	10	10	7
PBANKA_0211500	proteasome subunit alpha type-5	PMSA5			28.347	256	0	129.68	1	9	9	8	6	55.9	52	50.8	32.4	5107700	4293300	4230000	2543800	126610	249190	762570	194450		13.5896	14.3026	12.0423	12.1965	875220	863140	992710	1030900	183	220.5	221.5	293	11	10	9	7
PBANKA_0506100	PHAX domain-containing protein	506100			194.52	1682	0	98.812	1	10	8	6	6	8.5	6.8	5.5	5.2	994000	1331900	813830	896440	5853.4	6254.3	22871	3792.7		9.15463	8.98639	6.98303	6.51644	227580	252270	223990	274270	183	220.5	258.5	248.5	11	10	8	8
PBANKA_1410000	26S protease regulatory subunit 7	RPT1	expression		46.817	420	0	137.31	1	9	10	11	10	29.8	32.1	32.9	31	2729600	2931500	2479300	3261700	104260	88098	364940	77574		13.3094	12.8026	10.9791	10.8707	581550	606850	576550	643360	183	191.5	140.5	136.5	11	11	12	12
PBANKA_0407700	60S acidic ribosomal protein P2	RPP2	ribosome		11.804	111	0	173.92	1	8	7	6	8	70.3	54.1	51.4	70.3	4280000	3788500	2899300	2972100	208690	313390	1010800	223570		14.3106	14.6334	12.4489	12.3978	2064100	1713700	1654100	1586900	183	191.5	161	160.5	11	11	11	11
PBANKA_0817700	RNA-binding protein musashi	HoMu			40.234	344	0	165.13	1	8	8	7	5	26.7	27.3	26.2	16.9	3346300	4283900	2677300	2715200	76623	88176	404400	97957		12.8651	12.8039	11.1272	11.2073	791270	764840	641670	657330	183	191.5	161	248.5	11	11	11	8
PBANKA_1410400	V-type proton ATPase catalytic subunit A	1410400			68.35	611	0	319.77	1	10	12	12	10	24.4	31.1	30.8	25.9	3174500	4111100	3185600	3164000	87038	88181	375540	87564		13.0489	12.8039	11.0204	11.0455	851870	994400	925160	1143300	183	166.5	120.5	160.5	11	12	13	11
PBANKA_0110400	eukaryotic translation initiation factor 3 subunit L	EIF3L	expression		67.669	568	0	208.27	1	9	8	10	8	19.4	17.6	22.7	19.2	4327900	4949100	4478200	3557300	122670	135210	547690	137110		13.544	13.4206	11.5648	11.6924	1701800	1418600	1394800	1287500	183	166.5	140.5	248.5	11	12	12	8
PBANKA_0604300	tetratricopeptide repeat protein	TRP1			38.781	330	0	235.48	1	9	10	9	11	29.4	37.9	40.3	44.5	1919700	1521600	5280900	5315800	207300	64268	474650	177530		14.3009	12.3476	11.3583	12.0651	532980	599830	1392800	1343200	183	166.5	140.5	103	11	12	12	14
PBANKA_0406800	pre-mRNA-processing factor 19	PRPF19			56.677	499	0	164.06	1	10	11	9	9	27.7	32.7	27.1	27.7	1800100	2480300	969440	1363000	39851	52130	193000	28450		11.9219	12.0456	10.06	9.42358	478540	462760	320930	319880	183	166.5	187	191	11	12	10	10
PBANKA_1135700	CUGBP Elav-like family member 1	CELF1			57.187	511	0	74.292	1	6	7	6	7	17	20	17	20	3031300	3527100	1929200	2620100	95870	113010	404310	64772		13.1884	13.1618	11.1269	10.6105	623370	670700	610840	693070	183	145.5	221.5	136.5	11	13	9	12
PBANKA_1305300	FACT complex subunit SSRP1	SSRP1	DNA replication & repair		57.128	493	0	262.1	1	8	12	11	11	20.3	31.4	28.8	24.9	3652200	4701400	4111000	3901900	98805	91622	421310	107020		13.2319	12.8592	11.1863	11.335	730160	744280	866520	894750	183	126	140.5	136.5	11	14	12	12
PBANKA_0716000	structural maintenance of chromosomes protein 3	SMC3	chromatin architecture		139.07	1175	0	143.11	1	11	14	8	11	11.4	15.2	8.7	11.1	1402400	1805900	1239500	1745400	26051	20931	89906	18500		11.3086	10.7291	8.95793	8.80267	632560	631210	698430	778930	183	126	258.5	160.5	11	14	8	11
PBANKA_0311000	protein transport protein SEC31	SEC31			156.63	1388	0	194.17	1	11	18	10	11	11	18.6	9	10.1	2313600	3975800	1278900	2007800	29446	33230	137680	19324		11.4854	11.396	9.57276	8.86554	715800	755050	377940	563360	183	74	187	136.5	11	19	10	12
PBANKA_1354400	60S ribosomal protein L18	RPL18	ribosome		21.7	184	0	113.07	1	9	5	7	8	44.6	32.6	38.6	40.8	8821400	6892000	6366100	6076200	642130	925580	3012000	689000		15.9321	16.1958	14.0241	14.0216	5894900	4917500	5127900	4805300	154.5	396.5	221.5	136.5	12	6	9	12
PBANKA_1354500	60S ribosomal protein L18-2	RPL18-2	ribosome		21.523	187	0	285.54	1	7	6	6	5	32.1	31.6	31.6	27.3	17821000	14902000	11194000	11218000	2243500	3466200	10900000	2221200		17.7369	18.1007	15.8796	15.7103	10249000	8273900	8530400	7064600	154.5	292.5	161	416.5	12	8	11	5
PBANKA_1359300	VPS13 domain-containing protein	1359300			630.32	5434	0	45.663	1	12	8	2	2	3.4	2.1	0.4	0.4	917790	1026700	207880	93565	117.04	3031.1	7495.3	731.96		3.51043	7.94138	5.37357	4.14306	359180	444750	210900	0	154.5	292.5	763	784	12	8	2	2
PBANKA_0314700	replication factor C subunit 2	RFC2	DNA replication & repair		37.67	330	0	175.01	1	11	8	10	9	46.7	33.9	38.5	35.2	1990900	1453000	2118100	2180800	105110	92421	351040	90773		13.3211	12.8717	10.9231	11.0974	413290	456910	749020	737700	154.5	255.5	120.5	191	12	9	13	10
PBANKA_1434200	arginine--tRNA ligase	RRS	expression		68.501	588	0	83.187	1	12	9	12	9	25	19.6	24	19.9	2351700	1577200	1339700	1552400	42562	66953	189320	37053		12.0168	12.4066	10.0323	9.80474	400000	374960	307450	379400	154.5	255.5	120.5	191	12	9	13	10
PBANKA_0715200	eukaryotic translation initiation factor 3 subunit G	EIF3G	expression		31.554	269	0	178.74	1	10	7	9	5	48	35.3	40.5	24.9	1425400	1283100	1089100	241950	21995	122910	311210	80755		11.0645	13.283	10.7493	10.9287	578700	481300	430530	262700	154.5	255.5	187	416.5	12	9	10	5
PBANKA_0522800	40S ribosomal protein S19	RPS19	ribosome		20.025	172	0	142.13	1	9	7	7	5	51.7	50.6	50.6	39.5	8866500	7096100	5574100	5790200	560950	884300	2764400	652760		15.7371	16.1299	13.9003	13.9436	3099400	3009900	2733300	3697700	154.5	255.5	221.5	293	12	9	9	7
PBANKA_0407600	asparagine synthetase [glutamine-hydrolyzing]	AS			66.378	581	0	305.89	1	11	9	12	10	24.4	23.6	23.9	21.9	5116000	3967200	3931900	3974500	98923	115630	407440	96450		13.2336	13.1949	11.138	11.1849	1004000	990240	978020	1059400	154.5	220.5	120.5	160.5	12	10	13	11
PBANKA_0615400	serine--tRNA ligase	615400			61.829	536	0	83.067	1	11	10	9	7	27.8	23.3	22.6	17.9	1197900	1147900	690360	1046600	19932	30706	99402	17367		10.9224	11.282	9.10278	8.7115	303890	284330	279360	251320	154.5	220.5	187	293	12	10	10	7
PBANKA_1456200	rab specific GDP dissociation inhibitor	rabGDI			52.035	454	0	131.83	1	10	10	9	9	31.3	30.2	26.7	28.9	2269100	1921000	1842300	2297000	85740	79595	289820	65550		13.0273	12.6561	10.6466	10.6277	469220	470980	417930	590300	154.5	191.5	140.5	191	12	11	12	10
PBANKA_1202200	U5 small nuclear ribonucleoprotein component	EFTUD2			138.14	1193	0	65.853	1	12	11	5	9	13.7	14	7.4	10.1	1244600	1394100	644700	1014800	13150	15418	50690	7198.7		10.3223	10.2881	8.13121	7.44095	279610	342550	253270	284730	154.5	191.5	416.5	219.5	12	11	5	9
PBANKA_1346600	glutamine--tRNA ligase	QRS1			100.88	852	0	141.66	1	11	10	12	9	18.4	15.3	19.8	15.4	1530100	1823700	1246700	994100	14782	21130	82700	18233		10.4911	10.7428	8.8374	8.7817	296780	379140	334640	316000	154.5	166.5	120.5	191	12	12	13	10
PBANKA_0804100	conserved Plasmodium protein, unknown function	804100			177.94	1572	0	184.48	1	11	12	11	7	10.6	11.5	9.5	5.6	1453700	1411500	1105200	571410	7376.8	20761	64414	17090		9.48835	10.7173	8.47688	8.6883	255690	311960	176350	170520	154.5	166.5	140.5	293	12	12	12	7
PBANKA_1019400	60S ribosomal protein L7-3	RPL7-3	ribosome		33.284	284	0	144.59	1	10	10	9	7	32.4	30.3	29.9	26.1	14181000	13468000	11112000	9998000	1047600	1480700	5178700	1234700		16.6382	16.8736	14.806	14.8632	4568600	4009700	4331200	3677200	154.5	166.5	221.5	219.5	12	12	9	9
PBANKA_0928200	conserved protein, unknown function	928200			93.717	788	0	105.69	1	11	12	8	5	31.2	33.8	25.6	19.3	2142700	2376000	1404000	1017400	17587	31887	109770	21534		10.7418	11.3364	9.24592	9.02176	513960	601320	493220	371620	154.5	166.5	258.5	350.5	12	12	8	6
PBANKA_0504900	N-acetyltransferase, GNAT family	504900			135.97	1155	0	78.72	1	12	11	7	4	16	14.7	10.2	4.7	856920	1300700	354060	251940	3202.3	10727	38880	4963.6		8.28446	9.76472	7.74854	6.90461	209760	189800	165620	130770	154.5	166.5	299	416.5	12	12	7	5
PBANKA_1131600	DNA replication licensing factor MCM6	MCM6	DNA replication & repair		107.06	940	0	189.37	1	11	12	14	10	14.9	15.4	18.5	12.6	1626200	2083500	2869300	1884000	27335	22657	122420	43918		11.378	10.8434	9.40328	10.05	424480	441800	533340	513860	154.5	126	79.5	160.5	12	14	16	11
PBANKA_1011400	DNA topoisomerase 2	TOP2	chromatin architecture		168.62	1472	0	239.57	1	12	14	15	14	10.5	12.8	12.8	12.2	1468500	1594800	1953200	2194800	26268	16883	82511	21432		11.3206	10.419	8.83409	9.01491	326440	296340	454230	384500	154.5	126	79.5	103	12	14	16	14
PBANKA_1241800	DNA replication licensing factor MCM3	MCM3	DNA replication & repair		107.3	945	0	147.74	1	11	14	13	11	18.4	21.5	19.5	18.8	1877700	2447700	2658000	2751200	44405	29681	158780	46157		12.078	11.233	9.77847	10.1217	594550	599270	758040	890120	154.5	126	105	160.5	12	14	14	11
PBANKA_0913800	DNA-directed RNA polymerase I subunit RPA2	913800			170.8	1474	0	134.3	1	11	12	4	2	10.2	10.2	3.4	2.1	761320	816820	187190	152800	2037.3	6358.9	19072	2495.8		7.63201	9.01032	6.72096	5.91272	181320	155690	57662	0	154.5	126	499	784	12	14	4	2
PBANKA_1425100	karyopherin alpha	KARalpha			61.11	545	0	239.89	1	12	15	12	8	30.6	37.1	34.9	26.6	5426500	5657600	3069600	3198500	102090	212150	629730	103910		13.2791	14.0705	11.7662	11.2924	1191800	1077000	986180	953760	154.5	107	140.5	248.5	12	15	12	8
PBANKA_0610400	non-SERCA-type Ca2+ -transporting P-ATPase	ATP4			167.95	1492	0	66.171	1	10	13	10	7	14.7	18.2	14	7.4	1267600	1473000	731270	797340	9713.6	15429	50074	8647.5		9.88536	10.2891	8.11357	7.7055	245520	323380	262000	252850	154.5	107	161	248.5	12	15	11	8
PBANKA_1242800	eukaryotic translation initiation factor 3 subunit E	EIF3E	expression		62.559	527	0	257.97	1	12	13	10	10	24.7	30.6	24.3	21.3	3641800	3696700	2327800	2682900	95817	130060	438910	83136		13.1876	13.3646	11.2454	10.9706	1059600	850070	787620	884160	154.5	107	187	191	12	15	10	10
PBANKA_1308900	histidine--tRNA ligase	HRS1			124.65	1068	0	128.73	1	12	15	9	12	12.9	17.7	11.1	14.1	1298900	1879300	821550	904070	11082	18183	67537	11254		10.0755	10.5261	8.54519	8.08558	271680	267740	206060	185080	154.5	107	221.5	136.5	12	15	9	12
PBANKA_1429600	proline--tRNA ligase	PRS			88.154	755	0	131.32	1	11	12	6	8	17.9	20.7	10.2	13.4	1138900	1723100	1200600	1005300	15936	19876	84437	22287		10.5996	10.6545	8.86738	9.07135	546820	678280	519070	587550	154.5	107	349.5	248.5	12	15	6	8
PBANKA_0914400	heat shock protein 70	UIS24			73.165	663	0	284.62	1	12	15	16	16	23.5	30.8	31.2	30	1851900	2754600	3809400	4299100	113630	49467	339390	100220		13.4336	11.9699	10.8744	11.2402	410950	518140	796110	991820	154.5	94	68.5	49.5	12	16	17	19
PBANKA_1461800	26S protease regulatory subunit 8	RPT6	expression		48.007	422	0	316.59	1	8	11	9	7	30.8	38.9	34.8	26.8	3700100	4480300	3231200	3025600	76533	98956	377950	84907		12.8634	12.9703	11.0296	11.001	930390	1028400	864630	981480	154.5	94	105	103	12	16	14	14
PBANKA_1400600	cytoadherence linked asexual protein	RhopH1A			152.16	1296	0	172.86	1	11	21	22	26	9.7	18.2	20.4	24.1	2332700	4457000	5727800	7025900	82820	30493	236540	67625		12.9773	11.2719	10.3535	10.6727	526260	612610	799760	829250	154.5	56.5	19.5	16	12	21	26	29
PBANKA_1422400	importin subunit beta	1422400			100.41	877	0	163.21	1	12	7	8	8	18.4	11.4	12.9	12.2	2565500	1431900	1595900	959160	21225	39103	115340	21712		11.013	11.6307	9.31733	9.03364	619460	562920	655690	580410	131.5	336	187	160.5	13	7	10	11
PBANKA_1234800	40S ribosomal protein S9	RPS9	ribosome		22.146	189	0	89.467	1	9	7	8	10	41.8	37.6	41.8	43.4	8670400	9690500	7795300	7309300	868440	1039800	3971400	916490		16.3676	16.3636	14.423	14.4332	3077900	3606600	3874600	3197900	131.5	292.5	105	136.5	13	8	14	12
PBANKA_0720300	eukaryotic translation initiation factor 3 subunit M	EIF3M			51.417	434	0	201.88	1	11	10	12	11	27.4	25.8	27.6	27.4	9130400	7206600	5523700	4629400	159470	321550	926460	190720		13.9225	14.6704	12.3232	12.1685	1909900	1543600	1393400	1262000	131.5	220.5	105	136.5	13	10	14	12
PBANKA_1423300	DNA/RNA-binding protein Alba 1	ALBA1			26.88	242	0	268.11	1	8	8	9	6	34.3	34.3	38	29.3	8513900	7156700	7657300	8755200	439220	408170	1557200	359890		15.3842	15.0146	13.0723	13.0846	3414600	2852100	3984800	4023500	131.5	220.5	187	219.5	13	10	10	9
PBANKA_1202100	MKT1 domain-containing protein	1202100			133.32	1146	0	172.82	1	12	10	10	10	12.9	11.6	11.2	11.4	1337400	1453100	1020700	1195000	16041	19396	72325	15280		10.609	10.6192	8.644	8.52679	400660	465310	395920	428720	131.5	220.5	187	191	13	10	10	10
PBANKA_1239900	acyl-CoA synthetase	ACS10			76.842	674	0	212.35	1	11	8	13	10	21.7	15.3	27.4	22.3	2801200	1948100	3436300	3504000	100450	80033	321860	92678		13.2557	12.6641	10.7979	11.1274	660220	661280	863860	1045600	131.5	191.5	79.5	103	13	11	16	14
PBANKA_0819300	eukaryotic translation initiation factor 3 subunit F	EIF3F	expression		36.056	313	0	156.79	1	9	9	9	7	25.6	27.2	27.2	20.1	3522500	3907300	2587700	2500200	129340	166200	641470	134380		13.6204	13.7183	11.7928	11.6634	1202800	1047400	899680	855090	131.5	191.5	140.5	191	13	11	12	10
PBANKA_1009500	glutamate synthase [NADH]	1009500			336.29	2962	0	149.03	1	13	12	12	7	7.1	6.1	6.7	3.6	891200	872680	744460	547440	3351.9	5206.3	17757	4461.8		8.35033	8.7218	6.6179	6.75084	186250	207350	165590	163540	131.5	166.5	140.5	293	13	12	12	7
PBANKA_0938600	casein kinase 2, alpha subunit	CK2alpha			39.972	335	0	97.08	1	9	9	8	7	34	35.5	27.5	26.6	2060500	1964600	1382300	1014300	42301	76162	261350	61819		12.008	12.5925	10.4974	10.5432	649720	576270	526220	549620	131.5	166.5	161	191	13	12	11	10
PBANKA_1448200	asparagine/aspartate rich protein	1448200			564.04	4800	0	116.61	1	13	12	7	12	3.8	4	2.6	3.9	1089000	1219100	618400	874080	2573	3690	11543	1787.5		7.96881	8.22516	5.99653	5.43116	186010	236530	163150	147340	131.5	166.5	299	118.5	13	12	7	13
PBANKA_0602700	nucleosome assembly protein	NAPL			40.318	345	0	182.1	1	10	11	12	13	36.2	38.6	42.9	43.2	7126900	7013000	10002000	12862000	413340	272680	1184900	288120		15.2965	14.4326	12.6781	12.7637	2084100	1725700	3157100	3371800	131.5	145.5	105	56.5	13	13	14	18
PBANKA_0703900	receptor for activated c kinase	RACK1			35.583	322	0	252.69	1	9	9	8	9	42.9	42.9	40.7	42.9	13583000	13132000	12887000	13243000	638910	666740	2629300	657040		15.9248	15.7225	13.828	13.9531	5564500	5101500	6430400	6200100	131.5	145.5	140.5	103	13	13	12	14
PBANKA_1364300	glycerol kinase	1364300			56.555	501	0	283.54	1	12	12	11	13	36.1	30.5	27.9	36.5	2980100	2674600	2583400	3191100	112620	94003	395800	94168		13.4207	12.8962	11.0962	11.1504	643260	581640	726890	826440	131.5	145.5	140.5	118.5	13	13	12	13
PBANKA_0940900	RuvB-like helicase 2	RUVB2			53.405	475	0	190.1	1	13	12	12	10	39.8	35.2	33.7	30.5	4031000	3657500	3041600	3035000	92325	124410	427010	97243		13.134	13.3005	11.2057	11.1967	658730	597510	628220	601660	131.5	145.5	140.5	160.5	13	13	12	11
PBANKA_0917900	26S protease regulatory subunit 6A	RPT5	expression		50.976	451	0	191.56	1	10	10	9	11	36.8	34.8	34.4	37.5	3659900	4334600	3527100	4576600	78936	55294	270460	63272		12.908	12.1306	10.5469	10.5767	659770	723970	724670	793510	131.5	145.5	161	103	13	13	11	14
PBANKA_0823000	ubiquitin-like protein	823000			161.46	1384	0	213.23	1	12	13	15	15	13.5	13.7	15.4	16.5	2918500	4068300	5090100	5638400	64011	27194	193360	58345		12.6056	11.1068	10.0627	10.4598	904670	961550	1283600	1376600	131.5	126	68.5	68.5	13	14	17	17
PBANKA_0107400	ornithine aminotransferase	OAT			46.323	414	0	170.9	1	11	11	12	14	29.5	32.9	32.6	35	7417100	8641900	7686600	9284900	328690	254890	1168100	271600		14.9659	14.3353	12.6575	12.6786	1580600	1626700	1749600	1859300	131.5	126	105	68.5	13	14	14	17
PBANKA_0803100	DNA replication licensing factor MCM7	MCM7	DNA replication & repair		94.671	827	0	162.88	1	10	11	16	11	19.7	19.8	28.7	19.5	2608100	2185300	3404600	3395700	42250	36118	154820	45042		12.0062	11.5162	9.74203	10.0864	608650	662070	886580	843070	131.5	107	44.5	90	13	15	20	15
PBANKA_0906400	60S ribosomal protein L35ae	RPL35e	ribosome		16.483	143	0	171.17	1	6	5	3	5	42.7	42	29.4	30.1	12857000	9660900	8402300	3984100	501180	1707700	4676900	1174300		15.5745	17.0794	14.6589	14.7908	6174800	4796700	5207500	5541100	116.5	220.5	416.5	160.5	14	10	5	11
PBANKA_1360300	DNA/RNA-binding protein Alba 4	ALBA4			42.165	374	0	323.31	1	10	9	9	10	30.7	28.1	27.8	30.7	7481100	6872800	10039000	8509300	543940	488660	2050400	593310		15.6927	15.2742	13.4693	13.8059	1781600	1493800	2633200	2286300	116.5	191.5	140.5	103	14	11	12	14
PBANKA_0508100	chromodomain-helicase-DNA-binding protein 1	CHD1			304.72	2673	0	233.41	1	12	10	9	7	6.3	5.7	5.2	4	1183800	1060600	690580	579190	4708.8	8989.2	26871	5214.6		8.84071	9.50973	7.21556	6.97578	269480	249700	174990	195460	116.5	191.5	221.5	293	14	11	9	7
PBANKA_0930300	GTP-binding nuclear protein RAN/TC4	930300			24.886	214	0	147.07	1	11	11	12	12	61.7	60.3	65.4	65.4	10981000	8718400	11094000	12785000	782340	667160	2733500	720920		16.217	15.7234	13.8841	14.0869	3784000	3813400	4669400	4642600	116.5	166.5	68.5	68.5	14	12	17	17
PBANKA_1351800	26S proteasome regulatory subunit RPN3	RPN3	expression		58.536	500	0	238.98	1	11	8	7	9	28.6	22.6	20.6	21.4	3606600	2914700	2197900	2768300	78571	107260	323480	58937		12.9013	13.0865	10.8051	10.4743	842810	896470	830630	891560	116.5	166.5	187	219.5	14	12	10	9
PBANKA_1031900	eukaryotic translation initiation factor 2 subunit gamma	eIF2gamma			51.262	465	0	163.36	1	10	10	12	11	31.2	31.2	37	33.1	4283200	4163200	4232800	4029300	114700	112480	444700	120880		13.4471	13.1551	11.2643	11.5107	712550	720460	742630	794530	116.5	145.5	79.5	118.5	14	13	16	13
PBANKA_1237800	multidrug resistance protein 1	MDR1			160.94	1419	0	284.69	1	14	14	12	18	14.7	15.4	12.1	18	3531200	4258200	2971700	5552000	65789	46236	209160	41695		12.6451	11.8725	10.176	9.97502	642780	715000	711130	833440	116.5	126	120.5	32.5	14	14	13	22
PBANKA_0803600	importin-7	803600			143.63	1227	0	184.44	1	13	14	9	13	12	13.1	8.1	13	2654900	4331300	1615200	2672200	36291	40844	161490	24849		11.7869	11.6936	9.80288	9.22833	900670	958690	785090	873640	116.5	126	221.5	90	14	14	9	15
PBANKA_1017900	phosphoenolpyruvate carboxylase	PEPC			130.16	1120	0	105.8	1	13	14	13	14	14.7	17.3	14.9	15	2048500	2276900	1332000	2083800	27019	28105	106710	19596		11.3613	11.1543	9.20513	8.88571	310310	307820	291830	332400	116.5	107	120.5	103	14	15	13	14
PBANKA_0708000	protein transport protein SEC23	SEC23			86.136	759	0	195.99	1	12	15	11	10	23.2	31.1	25.3	21.7	2126800	3465200	1157700	1921300	43068	44611	183970	20947		12.0339	11.8209	9.99091	8.98189	463640	519120	406870	446840	116.5	82	120.5	160.5	14	18	13	11
PBANKA_0405500	60S ribosomal protein L7	RPL7	ribosome		30.49	257	0	106.47	1	9	11	7	8	30.4	38.1	28.8	30	7118400	6045100	4742700	4510500	439380	729240	2266000	480950		15.3847	15.8518	13.6135	13.503	3434900	2652300	2877000	2647300	116.5	82	140.5	136.5	14	18	12	12
PBANKA_0704100	ubiquitin conjugation factor E4 B	UBE4B			142.26	1218	0	232.8	1	14	20	3	3	15.1	22.7	3.5	3.6	3353300	3740900	231140	412390	6443.5	46217	107710	3611.5		9.2932	11.8719	9.21859	6.44582	790080	770030	64522	110440	116.5	56.5	607	625	14	21	3	3
PBANKA_1303800	triosephosphate isomerase	TIM			27.842	248	0	248.45	1	10	8	9	10	50.4	41.5	47.2	50.4	2779600	3271700	3212800	3901100	243820	165470	799040	191720		14.535	13.712	12.1097	12.1761	916570	1058800	1241000	1477900	105.5	220.5	161	118.5	15	10	11	13
PBANKA_0401600	N-ethylmaleimide-sensitive fusion protein	NSF			88.12	777	0	211.46	1	14	11	8	12	29.5	19.9	14.2	22.4	2918500	1272600	1330800	1997700	39908	46345	125420	22141		11.924	11.8759	9.4382	9.06187	542310	658930	472560	448280	105.5	191.5	221.5	118.5	15	11	9	13
PBANKA_1415600	DNA replication licensing factor MCM4	MCM4	DNA replication & repair		107.5	944	0	145.45	1	14	13	15	14	22	19.4	23.2	21.8	2815300	2653600	2874800	3671200	50527	36137	156570	38204		12.2643	11.5169	9.75824	9.84887	746600	927580	967350	948780	105.5	126	79.5	68.5	15	14	16	17
PBANKA_1138200	RuvB-like helicase 3	RUVB3			53.846	475	0	323.31	1	11	9	9	10	35.4	29.7	30.5	32.8	3696100	3082300	2125300	2855700	48837	82087	223330	30499		12.2153	12.7006	10.2706	9.52391	581770	533640	503550	544050	105.5	126	161	136.5	15	14	11	12
PBANKA_0518700	methionine--tRNA ligase	MRS1			104.7	898	0	163	1	14	13	7	11	18.4	16.6	8.9	14.9	2819500	2661100	1362700	1829000	28524	45454	146480	25840		11.4395	11.8479	9.66214	9.28475	485420	595770	453860	463890	105.5	126	299	160.5	15	14	7	11
PBANKA_1143600	alanine--tRNA ligase	AlaRS			141.34	1218	0	139.47	1	13	14	6	11	15.4	15.1	6.3	12.5	1514200	1754300	401980	1098400	12573	17161	55682	4807.5		10.2576	10.4426	8.26672	6.85851	323820	347970	203250	275100	105.5	126	349.5	118.5	15	14	6	13
PBANKA_1403800	translational activator GCN1	GCN1			394.9	3368	0	237.85	1	15	15	13	15	5.2	5.5	5.1	6.2	1519100	1316300	1075300	1479200	6974.7	7692.2	27197	5876.1		9.40749	9.28494	7.23296	7.14808	360490	327870	277710	340880	105.5	107	120.5	90	15	15	13	15
PBANKA_0712600	14-3-3 protein	14-3-3I			30.203	262	0	323.31	1	13	13	14	13	53.8	58	58.4	55.3	28878000	27710000	34081000	32882000	1589400	1412400	5981900	1644900		17.2396	16.8055	15.014	15.277	6931700	6475300	10108000	8906000	105.5	82	44.5	43	15	18	20	20
PBANKA_0823100	S-adenosylmethionine synthetase	SAMS			45.098	402	0	301.28	1	12	13	12	12	43.5	41.8	39.8	37.1	4441300	4727700	3402100	3663000	146340	161630	594250	144360		13.7985	13.6781	11.6825	11.7667	860020	929670	674000	728800	105.5	74	68.5	90	15	19	17	15
PBANKA_0802300	HECT-type E3 ubiquitin ligase UT	802300			405.31	3439	0	82.223	1	14	18	6	6	5.4	6.2	2.4	2.3	1116000	1197600	352080	335440	2033	6129.3	15781	1493.7		7.62896	8.95726	6.4477	5.17211	156520	156230	80795	78120	105.5	74	349.5	350.5	15	19	6	6
PBANKA_0306800	ATP-dependent RNA helicase UAP56	UAP56			53.03	466	0	217.93	1	14	10	9	11	47.6	33.9	32	36.7	12325000	17242000	10243000	12346000	235200	193610	951380	162540		14.4831	13.9386	12.3615	11.9379	4950000	5867300	5238100	5224100	92	166.5	187	118.5	16	12	10	13
PBANKA_1231700	60S ribosomal protein L2	RPL2	ribosome		27.89	260	0	323.31	1	12	10	11	9	52.7	39.2	49.6	45	14868000	13747000	11778000	9710400	552320	818300	2811400	658910		15.7147	16.018	13.9247	13.9572	4087600	3713500	3735700	3234900	92	145.5	68.5	160.5	16	13	17	11
PBANKA_1116800	BFR1 domain-containing protein	BFR1			53.339	448	0	278.11	1	14	12	12	11	31.9	28.8	31.2	24.3	6634700	6548600	5826300	4214500	119740	170040	649390	152620		13.5091	13.7513	11.8105	11.847	1362400	1395800	1430400	1274000	92	145.5	92.5	136.5	16	13	15	12
PBANKA_1410300	M1-family alanyl aminopeptidase	M1AAP			123.35	1064	0	165.79	1	16	13	10	12	17.6	16.4	11.9	16.2	1842200	2148200	1456400	1531300	20361	25946	94504	20512		10.9531	11.039	9.02988	8.95161	333300	384720	378660	361160	92	126	187	118.5	16	14	10	13
PBANKA_0210600	ubiquitin carboxyl-terminal hydrolase	USP			326.23	2788	0	221.77	1	16	12	8	7	9.6	6.8	4.7	3.4	1989900	1218800	554460	622440	3911.2	11111	24500	3109.2		8.57297	9.81546	7.08229	6.22976	265540	204460	163260	155270	92	126	258.5	293	16	14	8	7
PBANKA_1032700	CUGBP Elav-like family member 2	CELF2			58.891	507	0	104.24	1	15	13	15	11	33.1	31.6	33.3	25.2	4232400	4546800	4178900	2351500	86475	163260	546310	134260		13.0396	13.6926	11.5612	11.6621	984990	952490	935220	791720	92	107	51.5	160.5	16	15	19	11
PBANKA_1019500	60S ribosomal protein L5	RPL5	ribosome		33.882	293	0	323.31	1	12	12	13	12	44	46.4	49.5	46.4	10647000	11257000	8319200	9100700	536510	618500	2302700	491710		15.6728	15.6142	13.6367	13.5349	4328600	3960200	3515100	3818300	92	107	68.5	56.5	16	15	17	18
PBANKA_0614500	eukaryotic translation initiation factor 3 subunit I	EIF3I	expression		37.213	327	0	187.55	1	12	12	9	11	48.6	46.2	38.2	40.1	6334200	6807300	3281800	3745300	131800	193950	620600	72103		13.6476	13.9411	11.7451	10.7652	2001000	1725500	1449600	1219300	92	107	161	103	16	15	11	14
PBANKA_1109000	RNA polymerase I	1109000			300.21	2580	0	132.88	1	14	14	7	5	7.3	7	4	2.7	1481600	1177500	375210	287980	2133.2	6932.3	18739	2779.4		7.69837	9.13488	6.69555	6.06799	194980	164970	113680	92323	92	107	299	416.5	16	15	7	5
PBANKA_1113000	purine nucleoside phosphorylase	PNP			27.007	244	0	323.31	1	12	13	11	12	50	53.3	41.8	48.8	33540000	33861000	28255000	27963000	2064500	2515100	9269100	2131900		17.6169	17.6379	15.6458	15.6511	11515000	10555000	11768000	10850000	92	94	120.5	37.5	16	16	13	21
PBANKA_0406500	T-complex protein 1 subunit eta	CCT7			59.625	539	0	323.31	1	13	13	11	10	36.9	36.9	29.1	29.3	9739800	10974000	7038000	6721900	252300	365540	1300400	269410		14.5844	14.8554	12.8123	12.6669	2457900	2526200	2084400	2161000	92	94	140.5	136.5	16	16	12	12
PBANKA_0903900	coatomer subunit gamma	SEC21			113.49	979	0	265.42	1	13	15	14	12	19.3	21.3	19.9	19	4548700	5542500	4814900	2808500	44188	61119	267280	77802		12.0709	12.2751	10.5298	10.875	1030100	995600	871150	833230	92	82	79.5	118.5	16	18	16	13
PBANKA_0105600	translation initiation factor IF-2	IF-2	expression		106.72	933	0	318.45	1	16	19	13	15	23.6	30	18.5	22.7	4320400	4788800	2604700	2591800	43463	62554	230580	48615		12.0471	12.3086	10.3167	10.1965	1008100	807420	719780	655720	92	65	105	90	16	20	14	15
PBANKA_1352000	elongation factor 1-gamma	EF-1gamma			46.785	403	0	287.81	1	15	19	14	10	39.2	48.6	35.2	28.8	10718000	12888000	7468300	5766000	204230	442500	1491600	313400		14.2794	15.1311	13.0102	12.8851	2064500	2028200	1787300	1721700	92	56.5	92.5	191	16	21	15	10
PBANKA_0604800	eukaryotic translation initiation factor 3 subunit C	EIF3C	expression		108.91	925	0	272.99	1	15	16	12	9	21.5	21.6	14.3	10.6	6994900	6139100	3464400	2912200	65688	148280	416730	74178		12.6429	13.5537	11.1705	10.8061	1213800	1117600	915010	823540	92	56.5	120.5	191	16	21	13	10
PBANKA_1308600	fructose-bisphosphate aldolase 2	ALDO2			39.851	369	0	323.31	1	12	14	12	14	45	47.4	43.6	44.7	21286000	21090000	15619000	21570000	435510	419730	1616500	337320		15.3719	15.0549	13.1262	12.9912	7108500	6955000	6603500	7371100	92	50	92.5	27.5	16	22	15	23
PBANKA_1127700	nicotinate phosphoribosyltransferase	NAPRT			79.516	689	0	243.8	1	13	17	12	13	24.8	31.9	26	26	4770000	6360100	3290000	3593000	89479	115330	439570	72583		13.0888	13.1912	11.2475	10.7748	912330	993500	840870	731260	92	41.5	105	68.5	16	23	14	17
PBANKA_0511900	60S ribosomal protein L3	RPL3	ribosome		44.366	386	0	270.3	1	13	8	10	11	36.5	28.5	34.2	38.1	12093000	10317000	10833000	9005000	313600	436100	1542200	407990		14.8981	15.1101	13.0584	13.2656	3900600	3292800	3623000	2454700	80	126	79.5	90	17	14	16	15
PBANKA_0917500	structural maintenance of chromosomes protein 1	SMC1	chromatin architecture		192.45	1620	0	140.59	1	17	14	14	11	13.1	10.1	10.4	8.5	2609700	1969700	1554200	1236000	14045	29323	81858	17661		10.4173	11.2155	8.82263	8.73571	415560	383150	392010	450670	80	126	92.5	160.5	17	14	15	11
PBANKA_0308600	asparagine--tRNA ligase	NRS1			66.453	575	0	259.15	1	15	14	13	16	31	28	26.3	32.3	7368900	7954400	5818900	6502200	192090	216610	810330	170970		14.191	14.1005	12.1299	12.0108	1682900	1697500	1662000	1644100	80	107	105	80.5	17	15	14	16
PBANKA_1321000	MA3 domain-containing protein	1321000			70.786	591	0	201.86	1	17	15	12	15	37.7	30.1	23.4	32	5281000	6494500	4729200	4900100	166360	173590	720900	160050		13.9835	13.7811	11.9612	11.9156	1052700	1145600	1244800	1010700	80	94	140.5	90	17	16	12	15
PBANKA_0943100	CCR4-NOT transcription complex subunit NOT1-G	NOT1			339.93	2957	0	148.96	1	16	18	15	12	7.6	8.6	7.4	5.9	1741700	2077800	1371700	1233300	8114.1	10621	39732	8233.9		9.62579	9.75039	7.77981	7.63479	258420	255430	253630	245960	80	82	92.5	136.5	17	18	15	12
PBANKA_1126500	acetyl-CoA synthetase	ACS			107.7	950	0	229.99	1	15	17	13	13	17.2	22.9	18.4	17.3	4184400	6016100	3300600	3502900	65473	69299	301930	59557		12.6382	12.4563	10.7057	10.4894	1016000	1015200	722380	728230	80	74	92.5	118.5	17	19	15	13
PBANKA_1218200	T-complex protein 1 subunit epsilon	CCT5			59.183	535	0	321.31	1	13	17	14	13	33.8	37.6	33.6	30.5	5622200	8466500	5185200	4875300	125290	141500	630550	138980		13.5745	13.4862	11.768	11.712	2263500	2658200	2088800	1821000	80	31	79.5	90	17	25	16	15
PBANKA_0109100	transketolase	TK			75.511	670	0	95.074	1	14	12	9	11	27.2	22.2	18.7	20.4	2837500	2359900	1978500	2761500	72759	67408	229840	41655		12.7904	12.4164	10.3121	9.97364	433670	464170	489320	595560	72	145.5	140.5	118.5	18	13	12	13
PBANKA_1215600	40S ribosomal protein S3A	RPS3A	ribosome		29.984	262	0	323.31	1	12	12	13	13	46.6	43.9	46.9	46.9	13481000	12917000	10558000	10050000	454990	603140	2124900	476710		15.435	15.5779	13.5208	13.4902	1832800	1673200	1658700	1561300	72	94	51.5	68.5	18	16	19	17
PBANKA_1318400	6-phosphogluconate dehydrogenase, decarboxylating	6PGD			53.357	472	0	323.31	1	16	14	15	14	42.6	40.3	40.5	37.5	16154000	17704000	11958000	11302000	500110	700770	2523700	533740		15.5715	15.7943	13.7689	13.6532	2469400	2626200	2220800	2168900	72	94	79.5	68.5	18	16	16	17
PBANKA_1362000	glutamate--tRNA ligase	ERS1			94.132	803	0	234.89	1	17	15	14	15	25.8	23.2	21.4	22.2	4373700	4719900	2717500	3418000	69756	87774	306340	52887		12.7296	12.7973	10.7266	10.3181	957960	860690	761340	795650	72	94	79.5	80.5	18	16	16	16
PBANKA_1126400	transportin	1126400			133.96	1166	0	223.95	1	16	14	10	12	21.1	16.7	13.1	15.9	3367100	2512000	1310500	2018000	30427	52620	139950	20974		11.5326	12.0591	9.59635	8.98375	538640	473740	454400	486380	72	94	187	136.5	18	16	10	12
PBANKA_1219300	heat shock protein 110	HSP110c			94.897	836	0	323.31	1	17	17	19	18	25.1	26.4	29.7	27.6	16232000	18142000	13947000	14767000	299000	328390	1278800	282680		14.8294	14.7008	12.7882	12.7362	3948400	3961800	4041400	4104700	72	82	51.5	49.5	18	18	19	19
PBANKA_0207000	calcium-transporting ATPase	SERCA			127.35	1120	0	323.31	1	18	17	9	10	22.6	22.5	13.2	14	3826400	4061600	2036400	1912000	23841	50149	162460	32041		11.1807	11.9897	9.81152	9.59507	616890	638080	568290	505020	72	82	187	160.5	18	18	10	11
PBANKA_0818900	endoplasmic reticulum chaperone BiP	BIP			72.146	651	0	221.23	1	16	16	16	16	33.8	33.6	29.5	29.5	2993500	5185000	7009400	8740100	205290	62418	563980	170990		14.2869	12.3054	11.6071	12.011	580220	815500	1152400	1416700	72	65	24	32.5	18	20	25	22
PBANKA_1210800	hypoxanthine-guanine phosphoribosyltransferase	HGPRT			26.525	231	0	323.31	1	12	13	12	12	61.5	65.8	61.5	61.5	33210000	37982000	29889000	29522000	1543800	1709500	6818700	1553700		17.1976	17.0809	15.2029	15.1947	6176200	5631400	6126100	5641100	72	50	60.5	68.5	18	22	18	17
PBANKA_1024900	DNA replication licensing factor MCM2	MCM2	DNA replication & repair		111.36	971	0	226.44	1	17	17	19	19	22.2	24	26.9	26.2	2736500	2785100	3294600	3305700	35419	32951	142840	44697		11.7518	11.3838	9.62584	10.0753	696530	661710	944480	818410	65.5	87	51.5	43	19	17	19	20
PBANKA_0401500	exportin-1	401500			146.65	1246	0	323.31	1	17	17	14	19	18.2	18.9	15.5	20.5	2901500	3173000	2570300	3304200	40228	37655	144690	31453		11.9355	11.5763	9.6444	9.56834	515880	634280	601930	559570	65.5	74	105	43	19	19	14	20
PBANKA_0519900	conserved Plasmodium protein, unknown function	519900			180.33	1591	0	304.7	1	17	17	14	16	15.7	16.5	13.5	14.6	3446200	3318000	2680900	2154400	33144	46798	159600	36515		11.656	11.8899	9.7859	9.78364	628880	561820	569930	453040	65.5	65	79.5	80.5	19	20	16	16
PBANKA_1340100	L-lactate dehydrogenase	LDH			34.424	316	0	323.31	1	12	14	14	14	45.9	49.7	49.7	50	19276000	26834000	24138000	23031000	1023100	919410	4449000	1180400		16.6041	16.1861	14.5868	14.7983	4120500	4178700	4579800	5236900	65.5	41.5	29	32.5	19	23	24	22
PBANKA_0415500	coatomer subunit beta	SEC27			116.6	999	0	217.01	1	17	12	11	12	25.5	17.7	15.8	18.5	3380000	2153800	1642800	2733300	36330	45102	128230	19654		11.7884	11.8367	9.47017	8.88997	652830	640730	455340	528380	60	126	120.5	90	20	14	13	15
PBANKA_1411300	eukaryotic translation initation factor 4 gamma	EIF4G	expression		118.03	1013	0	267.91	1	18	20	15	11	24.2	26.1	18.3	16.2	4461300	4897700	2799900	2490000	49457	86382	284200	53557		12.2335	12.7742	10.6183	10.3362	918700	995790	823710	734560	60	65	92.5	160.5	20	20	15	11
PBANKA_1434700	clathrin heavy chain	CHC			230.16	1986	0	215.55	1	19	21	16	18	12.9	14.9	11.3	12.3	3000600	3658800	1845100	2704700	23880	27252	100970	17572		11.1831	11.1098	9.12536	8.72842	469560	545070	481850	549280	60	50	79.5	56.5	20	22	16	18
PBANKA_1214300	enolase	ENO			49.026	446	0	323.31	1	15	17	15	14	46.4	50	47.8	39.7	22814000	25966000	26360000	31448000	1069800	773360	3610900	889900		16.6685	15.9365	14.2857	14.3907	5420300	5982400	7533900	8778600	60	41.5	51.5	43	20	23	19	20
PBANKA_1347700	isoleucine--tRNA ligase	IRS1			151.13	1275	0	166.08	1	18	20	12	14	18.6	19.1	11.6	13.4	2904400	3753500	1227100	1828000	22178	35911	117570	13723		11.0764	11.5079	9.34496	8.37174	537270	534880	428350	398810	60	41.5	92.5	90	20	23	15	15
PBANKA_1019700	NTF2-like domain-containing protein	1019700			136.89	1176	0	306.6	1	17	21	10	8	20.4	22.2	11.1	8.8	5461200	4788700	1945800	1705400	24037	84612	212780	30998		11.1925	12.7443	10.2008	9.54732	799610	694300	675050	654220	60	41.5	187	191	20	23	10	10
PBANKA_1003100	pre-mRNA-processing-splicing factor 8	PRPF8			344.37	2949	0	172.73	1	18	22	13	13	8.6	10.2	6.2	6.9	2863600	3338100	1506900	1759900	10992	17503	56646	8861.8		10.0637	10.4711	8.29148	7.74082	353130	356980	242090	331990	60	33.5	92.5	118.5	20	24	15	13
PBANKA_1310800	40S ribosomal protein S5	RPS5	ribosome		29.938	271	0	323.31	1	12	10	9	12	53.1	45	41.7	53.1	19362000	16365000	11988000	12360000	548490	785910	2405800	437480		15.7047	15.9598	13.6999	13.3663	3729300	3139700	2988300	2733600	51.5	94	105	80.5	21	16	14	16
PBANKA_1426900	ATP-dependent RNA helicase DBP1	DBP1			104.22	909	0	323.31	1	19	17	15	17	27.8	25.7	20.9	24.2	6691700	7902000	5740700	4732500	96582	120910	495920	117160		13.199	13.2593	11.4215	11.4656	1755900	1636000	1586300	1485000	51.5	87	92.5	56.5	21	17	15	18
PBANKA_1010500	Hsp70/Hsp90 organizing protein	HOP			65.644	559	0	323.31	1	16	17	16	15	36.3	38.3	37.4	30.1	6397700	6818000	5432800	5257600	120720	143850	548110	123750		13.5209	13.51	11.5659	11.5445	1388100	1348200	1298000	1326700	51.5	74	60.5	56.5	21	19	18	18
PBANKA_1122900	hexokinase	HK			55.459	494	0	313.85	1	20	18	16	17	52.6	51	42.1	45.3	14220000	14127000	8699900	8142700	249000	445020	1422700	284630		14.5654	15.1393	12.942	12.7462	1871000	1791300	1481600	1403300	51.5	65	51.5	49.5	21	20	19	19
PBANKA_1329700	26S proteasome regulatory subunit RPN2	RPN2	expression		138.09	1219	0	299.52	1	18	16	15	15	19.4	17.6	16	17.1	3148400	4073500	2655700	2992900	26201	29720	125030	25651		11.3169	11.2349	9.43371	9.27416	688590	760510	800850	851210	51.5	65	60.5	68.5	21	20	18	17
PBANKA_1123500	ISWI chromatin-remodeling complex ATPase	ISWI	DNA replication & repair		292.62	2523	0	248.81	1	18	20	16	13	9.6	10.5	8.5	6.5	2449100	2705600	2063200	1185500	7968.3	16831	59949	14884		9.59963	10.4146	8.37324	8.48891	480180	435190	429820	350110	51.5	56.5	68.5	103	21	21	17	14
PBANKA_0303600	26S proteasome regulatory subunit RPN1	RPN1	expression		110.7	993	0	323.31	1	19	18	16	13	29.9	25.5	24.5	21.1	5626700	5386800	4439400	4670900	71693	75267	291860	59640		12.7691	12.5755	10.6567	10.4914	820420	877780	824310	816880	51.5	50	51.5	68.5	21	22	19	17
PBANKA_1235600	adenosylhomocysteinase	SAHH			53.675	479	0	323.31	1	16	16	16	14	37.6	38.6	36.1	35.1	24702000	25131000	15846000	15980000	568370	904910	2973100	593430		15.756	16.1632	14.0053	13.8062	5145200	5096100	3913300	4044700	51.5	50	60.5	68.5	21	22	18	17
PBANKA_0931200	heat shock protein 101	HSP101			103.2	907	0	199.16	1	19	22	20	15	26.2	32.2	29.2	21.6	4230100	4541300	4335400	3858100	62343	69638	280130	72114		12.5675	12.4633	10.5975	10.7654	528710	546080	620950	624640	51.5	41.5	35.5	68.5	21	23	22	17
PBANKA_0310900	T-complex protein 1 subunit theta	CCT8			60.808	543	0	323.31	1	20	20	17	18	43.3	44.6	34.3	35.2	9162700	7807200	5810900	5747400	131750	217840	664200	135780		13.647	14.1087	11.8431	11.6783	1395100	1366900	1226900	1028100	51.5	33.5	39.5	49.5	21	24	21	19
PBANKA_0103300	GYF domain-containing protein	103300			235.1	2033	0	246.74	1	21	18	16	11	15.2	12.8	11	7.5	2705300	2333700	1480800	1245900	11800	23084	68025	13123		10.1661	10.8704	8.55557	8.30724	369780	335360	246810	297310	43	74	68.5	160.5	22	19	17	11
PBANKA_1106700	60S ribosomal protein L4	RPL4	ribosome		46.131	411	0	323.31	1	17	17	15	14	41.4	43.3	38.7	35.8	39150000	33577000	29410000	25577000	1181300	1805700	5907700	1364400		16.8115	17.1599	14.996	15.0073	9061600	7292700	7913100	6890700	43	65	51.5	68.5	22	20	19	17
PBANKA_1459300	actin I	ACT1			41.884	376	0	323.31	1	13	14	13	13	53.5	56.4	53.5	59.6	23169000	25676000	21493000	24651000	948460	843910	3584500	815500		16.4948	16.0625	14.2751	14.2648	3676700	4109100	4303700	4771700	43	41.5	39.5	37.5	22	23	21	21
PBANKA_1444100	T-complex protein 1 subunit gamma	CCT3			60.835	542	0	323.31	1	20	21	18	14	41.3	41.7	35.8	32.5	16810000	18043000	10506000	11516000	319880	465730	1575700	291840		14.9267	15.2049	13.0894	12.7823	3581800	3582700	2745500	2837100	43	41.5	60.5	103	22	23	18	14
PBANKA_1121700	leucine--tRNA ligase	LRS1			146.88	1249	0	256.79	1	19	19	13	11	19.4	21	14.7	14	3879000	4083500	2419000	2101700	26963	51202	161140	31380		11.3583	12.0197	9.79975	9.56499	679330	646980	497230	491960	43	41.5	79.5	118.5	22	23	16	13
PBANKA_0105400	coatomer alpha subunit	105400			160.58	1383	0	268.19	1	21	23	12	19	19.9	22.6	12.6	19.8	4387900	6613500	2534800	3697800	36001	43164	163420	25197		11.7753	11.7733	9.82002	9.2484	926990	883690	597440	715000	43	25.5	105	32.5	22	27	14	22
PBANKA_0416000	high molecular weight rhoptry protein 3	RhopH3			105.07	908	0	323.31	1	19	28	26	25	24.2	36.3	33.4	33	6878400	10003000	10944000	11566000	168750	97170	564480	155560		14.0041	12.944	11.6084	11.8745	983170	1139100	1449200	1572000	43	16.5	12	16	22	31	32	29
PBANKA_0811300	exportin-7	811300			134.69	1160	0	264.82	1	21	17	18	16	22.4	19.9	22	18.9	4427300	3843500	3335800	3705900	65271	73934	257580	56146		12.6337	12.5497	10.4765	10.4043	930790	840150	930900	957550	38	87	60.5	68.5	23	17	18	17
PBANKA_1331400	MORC family protein	MORC			301.55	2623	0	323.31	1	22	28	25	17	13	15.7	15.1	9.8	3361000	5435400	2775000	1702200	11624	19377	84238	18490		10.1444	10.6178	8.86398	8.80189	646450	673000	454320	452680	38	19.5	24	56.5	23	29	25	18
PBANKA_0522900	pre-mRNA-splicing helicase BRR2	BRR2			288.18	2453	0	219.7	1	21	27	21	19	12.4	16.1	12.5	11.8	3091300	4309200	2263200	2549000	18785	21543	87100	16670		10.8369	10.7707	8.91218	8.6524	415550	405820	299550	359200	38	19.5	35.5	49.5	23	29	22	19
PBANKA_1217700	ATP-dependent RNA helicase DDX6	DOZI/DDX6			49.375	433	0	323.31	1	20	16	19	19	56.6	48.5	53.8	54.7	12764000	14253000	14103000	18546000	590180	402090	1905900	440720		15.8104	14.9929	13.3638	13.3769	2139400	2283200	3075400	3039300	33	74	39.5	24	24	19	21	24
PBANKA_0823400	phosphoglycerate kinase	PGK			45.494	416	0	323.31	1	20	16	19	20	58.2	48.3	53.6	57	11452000	12335000	12990000	14762000	425770	338610	1492900	380810		15.3393	14.745	13.0115	13.1661	1483100	1676300	2085900	2175500	33	56.5	33	21	24	21	23	25
PBANKA_0807000	DNA-directed RNA polymerase II subunit RPB1	RPB1	expression		261.05	2310	0	185.59	1	23	21	7	9	15.1	12.8	4.2	6	5888200	10450000	1182500	6196000	7293.7	25880	61800	6999.9		9.47201	11.0353	8.41712	7.40055	5359000	5775400	1728100	3699900	33	56.5	299	219.5	24	21	7	9
PBANKA_0107300	T-complex protein 1 subunit zeta	CCT6			61.433	543	0	317.5	1	19	19	18	16	51.4	47	46.8	42.2	16303000	15296000	9483300	8640100	232560	385250	1276900	236570		14.4668	14.9312	12.786	12.4793	3113900	3242100	2330400	2124000	33	33.5	39.5	80.5	24	24	21	16
PBANKA_1362900	lysine--tRNA ligase	KRS1			67.152	578	0	199.72	1	19	21	18	15	34.9	39.3	31	28.9	9017500	11750000	7382900	7442500	146320	176700	724140	150610		13.7983	13.8067	11.9677	11.8279	1600500	1749500	1647100	1727900	33	33.5	44.5	56.5	24	24	20	18
PBANKA_1118600	cell division cycle protein 48 homologue	CDC48			90.838	815	0	323.31	1	21	22	20	19	39.3	38.7	39.8	36.6	10590000	11404000	9448800	10045000	168630	188370	717830	161820		14.0031	13.899	11.9551	11.9315	1578200	1577000	1728500	1824800	33	28.5	29	37.5	24	26	24	21
PBANKA_1439200	polyadenylate-binding protein 1	PABP1			93.314	834	0	323.31	1	19	21	19	19	32.1	42.7	34.2	33.1	6162100	7951900	6696800	7428900	147030	117080	535670	132880		13.8053	13.2129	11.5328	11.6472	1240100	1429100	1488000	1566200	33	23	19.5	21	24	28	26	25
PBANKA_1134100	T-complex protein 1 subunit delta	CCT4			57.938	529	0	323.31	1	22	16	17	17	54.3	44.4	43.3	47.8	15665000	14204000	11537000	12830000	363270	436730	1527800	332400		15.1103	15.1121	13.0448	12.97	2533100	2390600	2282700	2551800	26.5	74	44.5	43	25	19	20	20
PBANKA_1232200	FACT complex subunit SPT16	SPT16	DNA replication & repair		127.56	1096	0	310.69	1	23	21	23	21	26.6	26.2	27.6	24.3	6173700	6453900	5813500	6767700	99204	89891	374240	91175		13.2377	12.8316	11.0154	11.1038	730590	779060	976240	948270	26.5	41.5	29	37.5	25	23	24	21
PBANKA_0912300	tudor staphylococcal nuclease	TSN			117.85	1013	0	275.54	1	21	23	14	19	27.6	32	18.9	23.4	6742100	6571600	4454800	5485100	75023	88306	304390	63594		12.8346	12.806	10.7174	10.584	1293300	1212500	1378500	1294100	26.5	41.5	79.5	43	25	23	16	20
PBANKA_0916200	T-complex protein 1 subunit alpha	TCP1			60.134	543	0	323.31	1	23	23	24	23	51.7	51.9	54.5	52.5	16825000	17232000	12303000	12471000	343050	461190	1612400	337980		15.0276	15.1908	13.1226	12.994	2385300	2347800	2043000	2019500	26.5	28.5	24	24	25	26	25	24
PBANKA_0610900	HSP40, subfamily A	HSP40			48.417	424	0	323.31	1	19	21	20	15	45.3	51.9	49.8	33.7	11560000	11384000	8315800	7609300	350150	533900	1735600	366640		15.0572	15.402	13.2288	13.1114	2494200	2207600	2096900	1729400	26.5	28.5	29	32.5	25	26	24	22
PBANKA_0903600	dynamin-like protein	DYN1			93.519	814	0	323.31	1	23	22	22	19	39.4	35.9	38.2	31	12506000	12295000	9278400	8513200	186430	272380	920130	201560		14.1478	14.431	12.3133	12.2483	1600000	1551000	1369000	1313700	26.5	23	19.5	27.5	25	28	26	23
PBANKA_0408400	phosphoglycerate mutase	408400			126.18	1069	0	171.91	1	21	17	19	17	24.5	20.5	22.3	20.1	4675700	3685900	2891600	1879300	24089	63265	175480	38217		11.1957	12.3249	9.92274	9.84936	393950	363660	378850	317140	21.5	56.5	39.5	68.5	26	21	21	17
PBANKA_1326400	glyceraldehyde-3-phosphate dehydrogenase	GAPDH			36.582	337	0	323.31	1	13	14	15	16	51	54.3	54.6	57.3	68141000	73346000	82379000	84068000	2915500	2339100	10758000	2907800		18.1149	17.5333	15.8607	16.0989	12582000	13497000	18509000	18443000	21.5	41.5	17	8	26	23	29	35
PBANKA_1206100	eukaryotic translation initiation factor 3 subunit D	EIF3D	expression		62.206	537	0	323.31	1	20	21	19	15	45.6	47.5	41.9	35	11989000	11807000	7021200	5589700	95861	245020	754540	158900		13.1882	14.2783	12.027	11.9052	2153400	1997000	1598500	1596100	21.5	28.5	29	49.5	26	26	24	19
PBANKA_0522700	alpha tubulin 2	TUBA2			49.719	450	0	323.31	1	5	5	4	4	48	48	46	43.1	24096000	25035000	17877000	19204000	609300	724100	2670300	548340		15.8564	15.8416	13.8504	13.6921	4468800	4638300	4301600	4688400	21.5	25.5	39.5	18.5	26	27	21	26
PBANKA_0830200	high molecular weight rhoptry protein 2	RhopH2			160.02	1354	0	323.31	1	24	26	25	28	21.9	23.9	23	25.8	7602400	9616000	9171600	10738000	113860	83913	409770	103740		13.4365	12.7324	11.1463	11.29	1013000	1133400	1351400	1433700	19	19.5	10.5	9.5	27	29	33	34
PBANKA_1210200	PRE-binding protein	PREBP			111.2	970	0	323.31	1	26	24	26	23	28.2	26.5	30	25.5	14857000	15421000	10452000	9470200	148560	220340	760100	156060		13.8203	14.1251	12.0376	11.8792	2388200	2183100	2002500	1942300	16.5	19.5	14	21	29	29	31	25
PBANKA_1206900	tubulin beta chain	TUBB			49.789	445	0	323.31	1	18	20	20	18	59.6	61.6	61.6	56.9	44277000	51648000	37675000	38493000	1344800	1582000	6070900	1328800		16.9985	16.9691	15.0353	14.9691	8604900	9569500	8445000	8632400	16.5	12	9	13.5	29	33	36	30
PBANKA_1232500	eukaryotic translation initiation factor 3 subunit B	EIF3B	expression		84.182	716	0	323.31	1	23	26	21	19	40.4	43.3	38.5	33.2	10905000	11357000	6057200	5768900	132370	248780	788050	144090		13.6538	14.3003	12.0897	11.764	1416100	1265400	988160	936670	16.5	12	24	27.5	29	33	25	23
PBANKA_1463000	osmiophilic body protein G377	G377			309.21	2606	0	323.31	1	27	34	20	27	13.4	16.4	10.1	13.6	4324600	6759200	2841800	3563500	20952	25990	106220	17084		10.9944	11.0414	9.19849	8.68779	578560	753610	528070	557560	16.5	8	33	13.5	29	37	23	30
PBANKA_1331900	eukaryotic initiation factor 4a	eIF4A			45.369	398	0	323.31	1	20	23	21	19	53	54.8	54.5	50.5	21550000	26911000	24490000	19379000	716830	807020	3539000	983260		16.0908	15.998	14.2567	14.5346	4463400	5137700	4847400	5032600	14	12	14	16	31	33	31	29
PBANKA_1014900	coatomer subunit beta	1014900			145.62	1256	0	323.31	1	30	30	23	20	29.8	29.6	23.6	21.3	10065000	10322000	5337900	4819400	69307	141180	434340	76645		12.7203	13.4829	11.2303	10.8533	1259500	1118500	887570	911640	12.5	16.5	33	43	32	31	23	20
PBANKA_0405200	T-complex protein 1 subunit beta	CCT2			59.088	533	0	323.31	1	25	26	26	25	60.2	65.1	65.9	60.4	14188000	18357000	12646000	14262000	361570	360010	1505600	312750		15.1035	14.8334	13.0237	12.8821	1437500	1689200	1505600	1706100	12.5	10	10.5	11	32	34	33	33
PBANKA_1428700	eukaryotic translation initiation factor 3 subunit A	EIF3A	expression		152.45	1263	0	323.31	1	29	26	24	22	27.9	25.1	23.4	21.6	27749000	27109000	22693000	12598000	205690	460450	1500600	387290		14.2897	15.1884	13.0189	13.1905	10875000	10546000	8138900	8180000	11	14.5	16	24	35	32	30	24
PBANKA_1125600	pyruvate kinase	PK			55.547	511	0	323.31	1	24	24	20	22	61.8	63	51.3	58.5	32283000	35280000	23036000	24826000	610990	753700	2783700	531840		15.8604	15.8994	13.9104	13.6481	5525000	5649400	5325100	4734500	10	9	14	12	36	36	31	32
PBANKA_0704500	HECT-like E3 ubiquitin ligase	HEUL			872.45	7480	0	235.04	1	36	25	5	8	7.1	5.5	1.1	1.8	5398500	2498800	287650	476290	1077.4	10721	18746	663.44		6.71291	9.76391	6.69609	4.00126	1056800	651440	84353	139020	9	23	416.5	248.5	38	28	5	8
PBANKA_0801200	erythrocyte membrane-associated antigen	801200			233.91	2037	0	323.31	1	35	29	23	25	22	20	15.6	17	7062300	5309400	3273800	3498000	30386	63451	170420	29052		11.5307	12.3291	9.88053	9.45378	1034600	909290	758840	713190	8	14.5	24	18.5	39	32	25	26
PBANKA_0816400	ATP-dependent 6-phosphofructokinase	PFK9			146.76	1299	0	323.31	1	39	36	37	33	35.7	34.8	34.2	30.3	23622000	23137000	15410000	15480000	197510	288900	955360	184960		14.2311	14.516	12.3675	12.1243	3136800	3216500	2438200	2353900	7	6.5	7	9.5	42	38	40	34
PBANKA_1314800	elongation factor 2	eEF2	expression		93.374	832	0	323.31	1	28	27	29	30	41.6	43.3	45.2	46.6	47706000	46650000	35131000	37510000	658340	875900	3051900	657460		15.968	16.1162	14.0431	13.954	6354000	6432600	6301300	6073400	6	6.5	8	6.5	45	38	39	43
PBANKA_0711900	heat shock protein 70	HSP70			75.22	693	0	323.31	1	31	29	28	30	45.7	43.7	43.4	45.2	113890000	118640000	111850000	112800000	2481800	2416800	9876400	2405100		17.8825	17.5804	15.7373	15.8251	8792200	8810000	10513000	9700500	5	5	2	2	53	52	65	57
PBANKA_1406700	carbamoyl phosphate synthetase	CPSII			247.64	2153	0	323.31	1	46	47	41	40	26.7	27.7	24.5	24.1	20413000	21157000	9355500	9377800	69853	154710	453230	70845		12.7316	13.615	11.2917	10.7398	1961400	1911700	1357100	1252200	4	4	6	6.5	55	53	42	43
PBANKA_1238800	karyopherin beta	KARbeta			127.82	1126	0	323.31	1	45	42	36	43	49.4	48.8	40.9	48.7	45068000	42531000	32562000	35890000	368970	484750	1657600	344590		15.1327	15.2626	13.1625	13.022	3502700	3323700	3249800	3502200	2.5	3	5	3.5	60	54	47	55
PBANKA_0805700	heat shock protein 90	HSP90			83.213	720	0	323.31	1	38	38	33	39	55.6	56.7	52.6	55.7	118680000	137500000	94502000	100190000	2469700	2917400	11045000	2312700		17.8755	17.852	15.8987	15.7686	12907000	15080000	12682000	12429000	2.5	2	4	1	60	61	57	69
PBANKA_1137800	glideosome-associated connector	GAC			291.41	2605	0	323.31	1	64	53	54	49	35.4	29.6	30.6	26.9	36897000	37681000	21987000	20808000	108410	203640	624140	112430		13.3657	14.0114	11.7533	11.4061	1623000	1616100	1293000	1291100	1	1	3	3.5	77	69	64	55

## Sheet: Supplementary Table 2, Tab 4
Protein Info										peptides				coverage				intensity				ibaq				ribaq					LFQ				MS count
ID	gene_product	gene_ID	category	comment	Mol. weight [kDa]	Sequence length	Q-value	Score	Number of proteins	WT_1	WT_2	G_ARK1_1	G_ARK1_2	WT_1	WT_2	G_ARK1_1	G_ARK1_2	WT_1	WT_2	G_ARK1_1	G_ARK1_2	WT_1	WT_2	G_ARK1_1	G_ARK1_2	enrichment	WT_1	WT_2	G_ARK1_1	G_ARK1_2	WT_1	WT_2	G_ARK1_1	G_ARK1_2	WT_1	WT_2	G_ARK1_1	G_ARK1_2
PBANKA_1343200	conserved Plasmodium protein, unknown function	INCENP2	CPC		269.33	2305	0	323.31	1	0	0	76	41	0	0	41.3	21.4	0	0	5024300000	1405700000	0	0	29784000	8092400	5.62034	2.08754	2.1969	12.9099	11.1701	0	0	104000000	36170000	0	0	110	61
PBANKA_1353900	inner centromere protein	INCENP1	CPC		135.04	1126	0	323.31	1	0	0	42	28	0	0	44.7	28.2	0	0	1.5908e+09	425590000	0	0	14986000	4219300	4.51486	2.44956	2.45635	11.919	10.2305	0	0	56731000	24424000	0	0	62	31
PBANKA_0104100	aurora-related kinase ARK1	ARK1	CPC	bait	40.909	353	0	180.52	1	0	0	24	13	0	0	67.7	45.3	0	0	11701000000	5755400000	0	0	218670000	96837000	6.7868	2.46338	2.0361	15.7861	14.751	0	0	2395500000	696550000	0	0	46	25
PBANKA_1129100	DNA polymerase epsilon catalytic subunit A	POLE-A	DNA replication & repair		334.3	2826	0	176.75	1	0	0	41	17	0	0	18.7	8.1	0	0	403980000	99440000	0	0	2325700	608690	3.65482	2.27235	2.28831	9.23112	7.43731	0	0	8323600	4815000	0	0	37	17
PBANKA_1034100	FANCJ-like helicase	FANCJ	DNA replication & repair		124.96	1069	0	93.721	1	0	0	31	13	0	0	30.7	15.7	0	0	350360000	109470000	0	0	4413000	1579200	4.18997	2.1253	2.40169	10.1552	8.81272	0	0	15890000	5892100	0	0	33	13
PBANKA_1102900	cell division control protein 6	CDC6	DNA replication & repair		101.56	869	0	117.96	1	0	0	24	15	0	0	35.4	24.7	0	0	349220000	165780000	0	0	5366700	2403800	4.43104	2.46512	2.01607	10.4375	9.41884	0	0	13806000	8474400	0	0	30	16
PBANKA_1416900	structural maintenance of chromosomes protein 2	SMC2	chromatin architecture		143.5	1227	0	110.87	1	0	0	25	9	0	0	25.2	8.7	0	0	319430000	48244000	0	0	4327400	605390	3.75898	2.28735	2.38317	10.127	7.42946	0	0	12268000	2028000	0	0	29	9
PBANKA_1108700	structural maintenance of chromosomes protein 4	SMC4	chromatin architecture		169.62	1442	0	146.56	1	2	0	27	12	1.7	0	24.1	10.2	0	0	227010000	93364000	0	0	2471300	955550	3.75238	2.45674	2.18208	9.31872	8.08793	0	0	9136000	6121700	2	0	28	15
PBANKA_0501300	DNA polymerase delta catalytic subunit	POLD-A	DNA replication & repair		126.55	1097	0	94.361	1	0	0	26	15	0	0	28.4	15.1	0	0	283300000	136880000	0	0	3468600	1986200	4.37547	2.14682	2.18445	9.8078	9.14354	0	0	13298000	9066900	0	0	28	17
PBANKA_1442200	protein SOC2	SOC2	DNA replication & repair		623.07	5372	0	66.644	1	0	0	25	7	0	0	5.8	1.7	0	0	174660000	34473000	0	0	540960	96438	2.64644	2.14302	2.35598	7.12705	4.77927	0	0	9866000	1801500	0	0	26	6
PBANKA_0712100	DNA helicase	712100	DNA replication & repair		120.76	1018	0	130.75	1	0	0	24	18	0	0	29	18.5	0	0	314770000	228310000	0	0	3814900	3195700	4.3252	2.12821	2.44377	9.9451	9.82966	0	0	31558000	18098000	0	0	26	19
PBANKA_0100800	zinc finger protein	100800			157.45	1382	0	103.96	1	0	0	19	7	0	0	18.7	8.4	0	0	170430000	37477000	0	0	2425200	568460	3.48623	2.27661	2.49365	9.29156	7.33866	0	0	8716000	4978700	0	0	21	8
PBANKA_1356300	CDT1-like protein	CDT1	DNA replication & repair		110.96	955	0	135.75	1	0	0	19	8	0	0	28	12.1	0	0	211980000	33971000	0	0	2825100	607020	3.80457	2.27113	2.18274	9.51175	7.43334	0	0	9180900	3193500	0	0	20	8
PBANKA_0105400	coatomer alpha subunit	105400	membranes		160.58	1383	0	61.295	1	0	0	17	8	0	0	17.6	8.7	0	0	148210000	48320000	0	0	1435200	246610	3.38939	2.01678	2.311	8.5347	6.13383	0	0	8078500	4669200	0	0	18	8
PBANKA_0818500	conserved protein, unknown function	818500			77.587	665	0	52.018	1	0	0	15	12	0	0	28.1	23.3	0	0	165480000	127810000	0	0	3303400	2325000	4.00782	2.39029	2.37743	9.7374	9.37076	0	0	9525400	7935500	0	0	17	14
PBANKA_0312500	origin recognition complex subunit 5	ORC5	DNA replication & repair		94.44	815	0	42.336	1	0	0	16	7	0	0	25.3	11.2	0	0	193090000	44584000	0	0	4348400	1143200	4.05842	2.40426	2.14937	10.1339	8.3466	0	0	12931000	5752900	0	0	16	7
PBANKA_1026300	conserved protein, unknown function	SYCP2L1	chromatin architecture		76.748	649	0	48.717	1	0	0	14	6	0	0	25	11.7	0	0	135290000	34540000	0	0	3248600	732160	3.87085	2.1635	2.33604	9.71327	7.70376	0	0	8569300	4055400	0	0	15	6
PBANKA_0401600	N-ethylmaleimide-sensitive fusion protein	NSF			88.12	777	0	65.699	1	0	0	14	9	0	0	27	18.1	0	0	124930000	46963000	0	0	2287400	724290	3.85493	2.31916	2.06363	9.20716	7.68817	0	0	9091900	5621900	0	0	15	9
PBANKA_0519900	conserved Plasmodium protein, unknown function	519900			180.33	1591	0	51.974	1	2	0	14	4	1.9	0	11.8	3.3	5961400	0	75496000	15457000	91713	0	1092700	237810	3.16916	2.03194	2.45592	8.14135	6.08141	0	0	7992600	1761200	2	0	15	5
PBANKA_0307100	conserved Plasmodium protein, unknown function	Timeless/Tof1	DNA replication & repair		253.96	2137	0	32.071	1	0	0	14	10	0	0	8.1	5.2	0	0	85129000	66131000	0	0	753360	585230	3.29018	2.17665	2.37796	7.60486	7.3806	0	0	6513000	5318800	0	0	14	10
PBANKA_0602000	origin recognition complex subunit 1	ORC1	DNA replication & repair		120.49	1038	0	78.211	1	0	0	11	5	0	0	11.9	5.5	0	0	124940000	34847000	0	0	1930200	643110	3.89102	2.13414	2.10096	8.9622	7.51666	0	0	8320100	4183300	0	0	14	6
PBANKA_1337500	protein STU2	STU2	KT_spindle_MTOC		373.28	3198	0	39.59	1	0	0	14	6	0	0	6	2.4	0	0	82365000	24672000	0	0	381990	114720	2.57836	2.48943	2.0308	6.62506	5.02971	0	0	0	0	0	0	14	5
PBANKA_0943100	CCR4-NOT transcription complex subunit NOT1-G	NOT1			339.93	2957	0	44.787	1	0	0	12	4	0	0	6.2	2	0	0	55634000	12805000	0	0	292670	64725	2.47763	2.04847	2.16718	6.2408	4.20399	0	0	0	0	0	0	14	4
PBANKA_1434700	clathrin heavy chain	CHC			230.16	1986	0	32.621	1	0	0	11	5	0	0	7.6	3.1	0	0	69035000	13510000	0	0	657480	128670	2.9375	2.04045	2.25019	7.40847	5.19527	0	0	4751200	1152900	0	0	14	5
PBANKA_0903900	coatomer subunit gamma	SEC21	membranes		113.49	979	0	50.274	1	0	0	12	8	0	0	16.6	11.1	0	0	106180000	49392000	0	0	1312600	588320	3.65849	2.29468	2.02242	8.40588	7.3882	0	0	9873100	8588000	0	0	13	11
PBANKA_1426500	cullin-1	CUL1			100.88	844	0	41.14	1	0	0	12	3	0	0	16.5	4.7	0	0	88909000	13347000	0	0	1492500	247170	3.49447	2.09373	2.121	8.59118	6.1371	0	0	6759800	2601700	0	0	13	4
PBANKA_1336900	conserved Plasmodium protein, unknown function	MCM10-like	DNA replication & repair		60.126	508	0	71.752	1	0	0	11	7	0	0	27	16.5	0	0	149570000	54159000	0	0	4379200	1302400	4.05393	2.45294	2.15463	10.1441	8.5347	0	0	11335000	7159700	0	0	12	7
PBANKA_1337600	BRCT domain-containing protein	1337600	DNA replication & repair		150	1265	0	42.687	1	0	0	11	5	0	0	11.2	5.1	0	0	90734000	32205000	0	0	1258400	438490	3.50562	2.06265	2.30439	8.34504	6.96414	0	0	6900400	4078500	0	0	12	4
PBANKA_0513900	ORC3 domain-containing protein	ORC3	DNA replication & repair		159.82	1346	0	30.704	1	0	0	11	8	0	0	10.3	6.9	0	0	120410000	37207000	0	0	1757800	545480	3.26621	2.47452	2.45669	8.82722	7.27912	0	0	8655000	5128400	0	0	12	9
PBANKA_0812000	DNA primase large subunit	PRIM2	DNA replication & repair		63.719	537	0	70.721	1	0	0	10	6	0	0	26.8	16.6	0	0	142470000	65521000	0	0	3124600	1530800	3.98562	2.30136	2.32149	9.65712	8.76781	0	0	11089000	8509300	0	0	12	6
PBANKA_0803000	origin recognition complex subunit 2	ORC2	DNA replication & repair		91.7	781	0	70.674	1	0	0	10	4	0	0	17.7	8.7	0	0	74564000	13146000	0	0	945550	99817	3.00712	2.06381	2.17999	7.93268	4.82896	0	0	0	0	0	0	12	4
PBANKA_0908500	myosin K	MyoK	KT_spindle_MTOC		194.68	1629	0	46.466	1	0	0	12	0	0	0	11.1	0	0	0	76994000	0	0	0	775780	0	2.07733	2.42049	2.40018	7.64717	2.36695	0	0	0	0	0	0	12	0
PBANKA_0706800	DnaJ protein	706800			75.395	646	0	50.84	1	0	0	11	7	0	0	28.2	17.6	0	0	167150000	54068000	0	0	3145300	1308900	4.17568	2.22485	2.13577	9.66665	8.54188	0	0	8983000	4815700	0	0	12	7
PBANKA_1312000	condensin-2 complex subunit G2	CAPG2	chromatin architecture		141.52	1181	0	20.243	1	0	0	10	2	0	0	9	1.9	0	0	44661000	0	0	0	666580	0	2.28652	2.19771	2.01815	7.4283	2.21136	0	0	0	0	0	0	11	2
PBANKA_1348800	origin recognition complex subunit 4	ORC4	DNA replication & repair		105.78	885	0	129.12	1	0	0	12	8	0	0	18.6	11.8	0	0	111290000	58002000	0	0	2283500	1234100	3.84298	2.42549	2.17034	9.2047	8.45699	0	0	10541000	5784700	0	0	11	8
PBANKA_1358300	conserved Plasmodium protein, unknown function	MSH2	DNA replication & repair		167.03	1419	0	38.158	1	0	0	12	4	0	0	10.6	3.8	0	0	83597000	19277000	0	0	1058200	244010	3.15678	2.27045	2.23211	8.09506	6.11854	0	0	5230300	3190800	0	0	11	3
PBANKA_0612300	apicomplexan kinetochore protein 7	AKiT7/MAD1	KT_spindle_MTOC		99.049	832	0	51.547	1	0	0	10	2	0	0	15	3.6	0	0	75163000	18130000	0	0	1670300	402900	3.31125	2.34727	2.36261	8.75356	6.84202	0	0	8007500	2078700	0	0	11	2
PBANKA_1003400	amino acid decarboxylase AAD	UIS14			261.21	2262	0	29.202	1	0	0	11	0	0	0	7.5	0	0	0	59271000	0	0	0	374460	0	1.74542	2.46119	2.48163	6.59634	2.03096	0	0	0	0	0	0	11	0
PBANKA_1230200	cdc2-related protein kinase 5	CRK5	DNA replication & repair		81.513	712	0	29.242	1	0	0	8	0	0	0	17.6	0	0	0	88138000	0	0	0	1995900	0	2.7627	2.08828	2.05402	9.01049	2.43342	0	0	0	0	0	0	10	0
PBANKA_0522900	pre-mRNA-splicing helicase BRR2	BRR2			288.18	2453	0	30.033	1	0	0	10	5	0	0	6.4	3.1	0	0	35859000	16519000	0	0	293930	135410	2.65127	2.02179	2.32176	6.247	5.26893	0	0	3695700	1824600	0	0	10	6
PBANKA_0406800	pre-mRNA-processing factor 19	PRPF19			56.677	499	0	38.857	1	0	0	8	2	0	0	26.7	7	0	0	53577000	10870000	0	0	1645300	434780	3.42802	2.35987	2.21528	8.7318	6.95188	0	0	0	0	0	0	10	2
PBANKA_1226600	tubulin gamma chain	TUBG	KT_spindle_MTOC		51.609	452	0	37.688	1	0	0	8	4	0	0	20.4	10.8	0	0	74621000	53082000	0	0	2763800	1966000	4.48105	2.06125	2.09155	9.4801	9.12879	0	0	7097600	9155900	0	0	9	5
PBANKA_0612200	apicomplexan kinetochore protein 3	AKiT3	KT_spindle_MTOC		143.69	1251	0	20.006	1	0	0	8	0	0	0	8.2	0	0	0	44569000	0	0	0	691880	0	2.14241	2.18617	2.42852	7.48205	2.4045	0	0	0	0	0	0	9	0
PBANKA_1117500	ribosomal protein L27a	RPL27a	ribosome		16.837	148	0	21.315	1	0	0	6	4	0	0	39.9	30.4	0	0	314840000	97046000	0	0	32608000	9033700	5.6899	2.20571	2.07721	13.0406	11.3288	0	0	48780000	19098000	0	0	9	4
PBANKA_0937100	vacuolar protein sorting-associated protein 35	VPS35			112.71	958	0	31.694	1	0	0	9	4	0	0	12.5	5.4	0	0	99819000	33685000	0	0	2123800	716700	3.7143	2.49496	2.02085	9.1001	7.67297	0	0	8158300	6229600	0	0	9	4
PBANKA_0210600	ubiquitin carboxyl-terminal hydrolase	USP			326.23	2788	0	27.119	1	0	0	9	2	0	0	4.6	0.9	0	0	48932000	10775000	0	0	279310	92090	2.32547	2.44217	2.23909	6.17339	4.71271	0	0	0	0	0	0	9	2
PBANKA_1304500	protein SOC3	SOC3			55.307	461	0	20.613	1	2	0	8	4	5.9	0	18.9	12.1	3467400	0	64410000	48439000	115580	0	2147000	1614600	3.9654	2.335	2.19429	9.11577	8.8447	0	0	7557200	6782700	2	0	9	5
PBANKA_1211300	autophagy-related protein 18	ATG18			43.534	380	0	22.492	1	0	0	8	2	0	0	30.5	8.2	0	0	51979000	4830700	0	0	2045300	219580	3.5671	2.15637	2.05212	9.04576	5.96634	0	0	0	0	0	0	9	2
PBANKA_0931200	heat shock protein 101	HSP101			103.2	907	0	34.373	1	0	0	8	9	0	0	12.8	14.3	0	0	54259000	55538000	0	0	724640	490220	3.29669	2.32417	2.12691	7.54879	7.12503	0	0	3558700	4949500	0	0	9	11
PBANKA_1231500	ubiquitin carboxyl-terminal hydrolase 2	USP2			142.4	1218	0	27.45	1	0	0	8	4	0	0	7	4	0	0	53073000	18423000	0	0	792130	274970	3.20618	2.039	2.31763	7.67726	6.29087	0	0	5141300	2694200	0	0	9	4
PBANKA_0706400	conserved Plasmodium protein, unknown function	DCC1			131.92	1107	0	29.206	1	0	0	8	6	0	0	10.4	7.2	0	0	64022000	27743000	0	0	764440	351690	3.1168	2.49542	2.08358	7.62593	6.6459	0	0	5563600	3748100	0	0	9	6
PBANKA_0913000	condensin-2 complex subunit D3	CAPD3	chromatin architecture		202.27	1706	0	35.371	1	0	0	8	3	0	0	6	2.8	0	0	45988000	14111000	0	0	350510	155070	2.75012	2.15727	2.19363	6.50098	5.46452	0	0	0	0	0	0	8	4
PBANKA_1326900	DNA polymerase alpha subunit B	POLA-B	DNA replication & repair		63.655	541	0	54.86	1	0	0	8	8	0	0	17.7	20.1	0	0	131380000	141130000	0	0	4379200	4409900	4.4309	2.22066	2.39204	10.1441	10.2943	0	0	15699000	12903000	0	0	8	9
PBANKA_0303300	conserved Plasmodium protein, unknown function	CDC45	DNA replication & repair		74.425	619	0	26.669	1	0	0	8	8	0	0	14.4	13.2	0	0	72487000	50106000	0	0	1889000	1261400	3.61742	2.37104	2.44444	8.93107	8.48855	0	0	8550300	5927200	0	0	8	8
PBANKA_0202500	P-loop containing nucleoside triphosphate hydrolase	RFC-like	DNA replication & repair		123.91	1043	0	28.279	1	0	0	8	2	0	0	9.7	2.7	0	0	82218000	8721500	0	0	1677900	120870	3.10869	2.36961	2.09052	8.76011	5.10505	0	0	0	0	0	0	8	3
PBANKA_0715200	eukaryotic translation initiation factor 3 subunit G	EIF3G	expression		31.554	269	0	104.52	1	0	0	6	4	0	0	31.6	24.2	0	0	128310000	58043000	0	0	10757000	4295400	4.77337	2.15738	2.38804	11.4407	10.2563	0	0	0	0	0	0	8	7
PBANKA_1243900	apicomplexan kinetochore protein 5	AKiT5	KT_spindle_MTOC		176.43	1522	0	10.659	1	0	0	6	0	0	0	5.3	0	0	0	16290000	0	0	0	194260	0	1.73267	2.27013	2.17677	5.64951	2.05549	0	0	0	0	0	0	8	0
PBANKA_0415500	coatomer subunit beta	SEC27			116.6	999	0	29.907	1	0	0	9	3	0	0	11.9	4.6	0	0	95113000	13520000	0	0	1461500	255100	3.21749	2.19796	2.38435	8.5609	6.18266	0	0	7577700	2268800	0	0	8	3
PBANKA_1003100	pre-mRNA-processing-splicing factor 8	PRPF8			344.37	2949	0	29.564	1	0	0	9	7	0	0	4.4	3.2	0	0	61770000	11868000	0	0	130930	85382	2.1751	2.2642	2.18798	5.08032	4.6036	0	0	0	0	0	0	8	7
PBANKA_1403800	translational activator GCN1	GCN1			394.9	3368	0	18.527	1	0	0	9	0	0	0	3.2	0	0	0	35609000	0	0	0	194580	0	1.76307	2.20785	2.15934	5.65189	2.04777	0	0	0	0	0	0	8	0
PBANKA_1204800	phosducin-like protein 3	PhLP3			22.938	193	0	27.444	1	0	0	8	4	0	0	49.7	30.1	0	0	63677000	32243000	0	0	3201300	1342400	3.94733	2.27979	2.34877	9.69211	8.57834	0	0	8024000	6864100	0	0	8	5
PBANKA_0822900	dynein intermediate chain	DNAI1b			93.53	797	0	23.82	1	0	0	8	6	0	0	12.7	9.2	0	0	55710000	53925000	0	0	1252200	1185400	3.75675	2.27635	2.17878	8.33792	8.3989	0	0	4818000	6733700	0	0	8	6
PBANKA_0508100	chromodomain-helicase-DNA-binding protein 1	CHD1			304.72	2673	0	21.511	1	0	0	8	4	0	0	4	1.8	0	0	35949000	0	0	0	185520	0	1.69377	2.33948	2.21651	5.5831	2.13371	0	0	0	0	0	0	8	4
PBANKA_0311000	protein transport protein SEC31	SEC31			156.63	1388	0	36.484	1	0	0	7	6	0	0	7.6	5.7	0	0	54686000	37731000	0	0	754060	589550	3.54024	2.21554	2.02073	7.6062	7.39121	0	0	5786000	4250100	0	0	8	6
PBANKA_0418000	ATP-dependent RNA helicase DDX60	DDX60			288.79	2420	0	24.334	1	0	0	7	6	0	0	4.2	3.1	0	0	27512000	18693000	0	0	208430	104410	2.39967	2.15573	2.28027	5.75109	4.89386	0	0	0	0	0	0	8	6
PBANKA_0306500	ARMT1-like domain-containing protein	ARMT1	DNA replication & repair		55.103	454	0	13.148	1	0	0	7	2	0	0	15	5.7	0	0	51530000	12341000	0	0	1677800	242910	3.2548	2.2252	2.34407	8.76002	6.11202	0	0	5669800	2698000	0	0	7	2
PBANKA_1356400	DNA repair protein RAD5	RAD5	DNA replication & repair		166.22	1433	0	24.227	1	0	0	7	3	0	0	5.6	2.9	0	0	28848000	9913900	0	0	339380	116630	2.5503	2.28891	2.22347	6.45442	5.05354	0	0	0	0	0	0	7	3
PBANKA_0102700	conserved Plasmodium protein, unknown function	CFAP157	KT_spindle_MTOC		44.5	372	0	23.256	1	0	0	8	4	0	0	22.8	14	0	0	80346000	16520000	0	0	5021600	1032500	4.25007	2.14135	2.22123	10.3416	8.19967	0	0	9446700	4926200	0	0	7	5
PBANKA_1038200	nuclear formin-like protein MISFIT	MISFIT	KT_spindle_MTOC		185.88	1594	0	18.009	1	0	0	7	2	0	0	5.3	1.6	0	0	38359000	12948000	0	0	408070	137750	2.67921	2.2088	2.27535	6.72034	5.29365	0	0	4721200	2947200	0	0	7	2
PBANKA_0405600	end-binding protein 1	EB1	KT_spindle_MTOC		50.616	435	0	44.323	1	0	0	6	3	0	0	17	8.7	0	0	64227000	21174000	0	0	2792500	920610	3.63952	2.36982	2.44653	9.49501	8.03419	0	0	6733700	4122800	0	0	7	3
PBANKA_1201100	conserved Plasmodium protein, unknown function	1201100			106.81	912	0	30.335	1	0	0	7	3	0	0	10.9	4.2	0	0	29219000	5366200	0	0	490980	92520	2.42896	2.45033	2.36929	6.98719	4.71943	0	0	0	0	0	0	7	3
PBANKA_1223300	ras-related protein Rab-18	RAB18			23.126	201	0	22.95	1	0	0	6	3	0	0	36.8	20.4	0	0	96885000	52694000	0	0	9297000	4551100	5.2087	2.06467	2.07648	11.2302	10.3397	0	0	10574000	12198000	0	0	7	4
PBANKA_1029600	conserved Plasmodium protein, unknown function	1029600			44.48	376	0	17.368	1	0	0	6	3	0	0	18.1	8	0	0	106490000	56578000	0	0	6655700	3536100	4.66986	2.26599	2.17177	10.748	9.97568	0	0	14640000	13345000	0	0	7	3
PBANKA_0103900	KH domain-containing protein	103900			82.056	735	0	21.28	1	0	0	6	7	0	0	9	11.2	0	0	58666000	53288000	0	0	1629600	1267300	3.78062	2.11998	2.43304	8.71797	8.49528	0	0	8954100	6675600	0	0	7	8
PBANKA_0719700	conserved Plasmodium protein, unknown function	719700			88.621	755	0	16.525	1	0	0	6	6	0	0	9.4	10.5	0	0	37238000	38898000	0	0	776080	892780	3.49756	2.0584	2.41261	7.64773	7.9899	0	0	0	0	0	0	7	5
PBANKA_1417300	translocation protein SEC63	SEC63			77.763	669	0	21.301	1	0	0	6	5	0	0	13.8	11.5	0	0	36745000	24506000	0	0	630610	267950	2.99323	2.30263	2.24157	7.34827	6.25356	0	0	4288300	4642800	0	0	7	6
PBANKA_0105300	WD repeat-containing protein	EDC4-like			208.2	1778	0	23.357	1	0	0	6	2	0	0	4.5	1.3	0	0	28360000	5249700	0	0	270100	49997	2.12214	2.25679	2.43494	6.12502	3.83151	0	0	0	0	0	0	7	2
PBANKA_1310400	centrin-2	CEN2			19.369	168	0	26.027	1	0	0	5	5	0	0	36.3	43.5	0	0	132820000	120810000	0	0	7471900	7655800	5.07078	2.16012	2.17945	10.9149	11.0901	0	0	14295000	11027000	0	0	7	6
PBANKA_0301800	condensin-2 complex subunit H2	CAPH2	chromatin architecture		92.28	775	0	17.324	1	0	0	6	2	0	0	10.3	2.7	0	0	59153000	9031400	0	0	1408400	215030	3.0424	2.42339	2.32406	8.50751	5.93614	0	0	6781000	2779500	0	0	6	2
PBANKA_1133800	DNA helicase	1133800	DNA replication & repair		101.09	867	0	19.221	1	0	0	6	3	0	0	10.6	4.4	0	0	47933000	18385000	0	0	729170	375210	3.02565	2.44894	2.27635	7.55778	6.7393	0	0	4379900	2947900	0	0	6	3
PBANKA_0813900	26S proteasome regulatory subunit RPN8	RPN8	expression		36.839	319	0	27.046	1	0	0	6	5	0	0	22.6	16.9	0	0	69510000	76053000	0	0	3705300	4473700	4.27464	2.37211	2.35766	9.90304	10.315	0	0	11290000	14055000	0	0	6	5
PBANKA_1354100	ras-related protein Rab-11B	RAB11B	membranes		25.82	228	0	10.002	1	0	0	5	2	0	0	25	9.2	0	0	28318000	9632200	0	0	1573200	535120	3.52386	2.48641	2.03097	8.66715	7.25146	0	0	0	0	0	0	6	2
PBANKA_1454600	nucleoporin NUP269	NUP269	nuclear pore		268.54	2260	0	17.696	1	0	0	7	0	0	0	3.8	0	0	0	21755000	0	0	0	108680	0	1.50502	2.32082	2.23779	4.81161	2.04919	0	0	0	0	0	0	6	0
PBANKA_1358900	dynactin subunit 2	1358900			85.235	728	0	14.661	1	0	0	7	0	0	0	11.1	0	0	0	21996000	0	0	0	511530	0	2.10649	2.25055	2.08408	7.04634	2.08448	0	0	0	0	0	0	6	0
PBANKA_0401800	lipin	401800			126.5	1093	0	32.312	1	0	0	7	0	0	0	9.4	0	0	0	43649000	0	0	0	566840	0	2.1028	2.11987	2.42888	7.19446	2.37066	0	0	0	0	0	0	6	0
PBANKA_1139400	polyubiquitin binding protein	DOA1			99.91	849	0	30.651	1	2	0	6	8	2.8	0	9.8	12.5	4509400	0	42633000	44951000	90188	0	781940	731220	3.61051	2.19645	2.05793	7.65858	7.7019	0	0	4653100	5120500	2	0	6	8
PBANKA_0601100	mitochondrial phosphate carrier protein	PIC			36.478	323	0	13.678	1	0	0	6	2	0	0	20.1	6.8	0	0	40302000	2978600	0	0	2041700	156770	3.38891	2.05006	2.23553	9.04322	5.48025	0	0	0	0	0	0	6	3
PBANKA_1358700	conserved Plasmodium protein, unknown function	APC4			110.15	935	0	12.926	1	0	0	6	2	0	0	8	3.3	0	0	22509000	20689000	0	0	441340	405670	3.23236	2.20072	2.03313	6.83341	6.8519	0	0	0	0	0	0	6	3
PBANKA_1414400	exportin-T	1414400			136.68	1174	0	20.383	1	0	0	6	3	0	0	7.2	2.8	0	0	23895000	17177000	0	0	398260	286290	3.01346	2.26425	2.06111	6.68523	6.34908	0	0	3472200	3356100	0	0	6	3
PBANKA_1202200	U5 small nuclear ribonucleoprotein component	EFTUD2			138.14	1193	0	63.019	1	0	0	6	6	0	0	10.1	8.6	0	0	35196000	29929000	0	0	180320	163980	2.44999	2.25005	2.27535	5.54208	5.54512	0	0	3037900	4189700	0	0	6	5
PBANKA_1007200	replication protein A1, large subunit	RPA1			135.59	1170	0	18.21	1	0	0	6	2	0	0	6.4	1.2	0	0	31260000	1362700	0	0	359090	21293	2.10114	2.13061	2.21747	6.53587	2.60005	0	0	0	0	0	0	6	2
PBANKA_0517500	bromodomain protein 1	BDP1			55.988	489	0	40.826	1	0	0	6	0	0	0	20.9	0	0	0	23281000	0	0	0	624880	0	1.96746	2.47149	2.40889	7.3351	2.26688	0	0	0	0	0	0	6	0
PBANKA_1452500	conserved Plasmodium protein, unknown function	1452500			81.031	722	0	16.473	1	0	0	5	5	0	0	8.3	9.1	0	0	74366000	63281000	0	0	2754300	2343700	3.99353	2.4689	2.2531	9.47514	9.38231	0	0	8275900	8130000	0	0	6	5
PBANKA_1137200	protein transport protein Sec24A	SEC24A			106.43	942	0	16.271	1	0	0	5	3	0	0	7.3	3.5	0	0	39314000	25107000	0	0	1150600	794060	3.78221	2.00996	2.23007	8.21584	7.82085	0	0	3632600	4295300	0	0	6	4
PBANKA_0909600	AP2 domain transcription factor AP2-G5	ApiAP2			254.12	2192	0	31.282	1	0	0	5	0	0	0	3.2	0	0	0	16533000	0	0	0	151670	0	1.72591	2.17165	2.27506	5.29246	2.38218	0	0	0	0	0	0	6	0
PBANKA_1107300	nuclear protein localization protein 4	NPL4			60.477	516	0	35.208	1	0	0	4	7	0	0	11.2	17.8	0	0	24592000	31393000	0	0	562430	901880	3.46148	2.13617	2.25148	7.1832	8.00453	0	0	3035200	4207100	0	0	6	7
PBANKA_0913400	protein phosphatase PPM8	PPM8			66.193	577	0	11.104	1	0	0	4	2	0	0	10.7	5.9	0	0	24091000	7291900	0	0	892260	270070	3.24121	2.16289	2.19163	7.84899	6.26493	0	0	0	0	0	0	6	2
PBANKA_0209200	parasite-infected erythrocyte surface protein	PIESP15			58.833	505	0	15.838	1	0	0	4	3	0	0	9.7	7.1	0	0	27336000	21094000	0	0	581780	592920	3.12956	2.41911	2.25613	7.232	7.39944	0	0	0	0	0	0	6	4
PBANKA_1448900	DNA polymerase epsilon subunit B	POLE-B	DNA replication & repair		73.233	623	0	18.376	1	0	0	5	2	0	0	10.6	5.3	0	0	61699000	23467000	0	0	1192100	321710	3.44199	2.0978	2.19748	8.26696	6.51736	0	0	9364800	6799200	0	0	5	2
PBANKA_1349400	DNA replication complex GINS protein	PSF2	DNA replication & repair		59.361	502	0	11.242	1	0	0	5	4	0	0	9.8	8	0	0	31431000	9242000	0	0	1064600	332580	3.40948	2.12204	2.18039	8.10376	6.5653	0	0	5125900	2629700	0	0	5	4
PBANKA_1344300	chromatin assembly factor 1 subunit B	CAF1B	DNA replication & repair		58.875	513	0	19.897	1	0	0	4	3	0	0	13.3	9.7	0	0	20268000	22754000	0	0	159010	271520	2.60318	2.33717	2.13171	5.36064	6.27266	0	0	4055200	3298600	0	0	5	4
PBANKA_0605300	eukaryotic translation initiation factor 5	EIF5	expression		58.939	515	0	11.511	1	0	0	4	2	0	0	10.5	4.1	0	0	122330000	18363000	0	0	518820	337540	3.16497	2.00049	2.31342	7.06676	6.58666	0	0	18020000	26433000	0	0	5	3
PBANKA_1430900	SUN domain-containing protein	SUN1	KT_spindle_MTOC		102.52	872	0	7.9541	1	0	0	6	0	0	0	9.2	0	0	0	16178000	0	0	0	277210	0	1.98566	2.24048	2.01287	6.1625	2.28321	0	0	0	0	0	0	5	0
PBANKA_1458800	kinesin-15	kinesin-15	KT_spindle_MTOC			1414	0	18.988	1	0	0	5	6	0	0	3.7	5	0	0	32383000	30845000	0	0	420560	400590	2.98219	2.36311	2.19647	6.76384	6.83372	0	0	4516800	4723700	0	0	5	6
PBANKA_0407400	aurora-related kinase ARK2	ARK2	KT_spindle_MTOC		200.22	1719	0	8.555	1	0	0	4	0	0	0	3.1	0	0	0	3721200	0	0	0	37702	0	1.1902	2.1136	2.41696	3.28424	2.10805	0	0	0	0	0	0	5	0
PBANKA_1451500	conserved Plasmodium protein, unknown function	1451500			43.098	369	0	20.978	1	0	0	6	7	0	0	24.9	28.7	0	0	64536000	51627000	0	0	2176900	1950000	4.12725	2.35603	2.06647	9.13573	9.117	0	0	9091200	5581800	0	0	5	7
PBANKA_0913700	coatomer subunit delta	913700			57.497	494	0	17.139	1	0	0	6	4	0	0	17.8	10.1	0	0	70049000	37265000	0	0	2301200	1381200	3.79493	2.49377	2.20599	9.21584	8.61945	0	0	8151000	4421700	0	0	5	5
PBANKA_0925100	leucine-rich repeat protein	LRR11			83.058	722	0	18.645	1	0	0	6	2	0	0	11.2	3.2	0	0	54911000	2453000	0	0	1408000	62898	2.59199	2.48232	2.40573	8.5071	4.16268	0	0	0	0	0	0	5	2
PBANKA_1111600	prefoldin subunit 6	1111600			13.876	119	0	15.951	1	0	0	5	4	0	0	45.4	35.3	0	0	54325000	54936000	0	0	7760700	7497900	4.46292	2.46004	2.4761	10.9696	11.06	0	0	8269000	10274000	0	0	5	5
PBANKA_0207200	V-type proton ATPase subunit C	207200			45.272	383	0	10.193	1	0	0	5	4	0	0	15.1	11.2	0	0	42865000	14209000	0	0	1451400	491140	3.5966	2.16425	2.19504	8.5509	7.12773	0	0	0	0	0	0	5	3
PBANKA_1227400	serine/threonine protein phosphatase 2B catalytic subunit A	CNA			61.095	531	0	16.528	1	0	0	5	4	0	0	16.8	12.6	0	0	51189000	40512000	0	0	1443300	1281600	3.45163	2.47867	2.46226	8.54282	8.51147	0	0	7725200	7714800	0	0	5	4
[truncated: 826 more rows]
