# Supplementary material for: Plasmodium ARK1 regulates spindle formation during atypical mitosis and forms a divergent chromosomal passenger complex
Source: Research Square preprint supplement (doi:10.21203/rs.3.rs-7473364/v1), 2025-09-25
Supplement: Supplementary file 5 [file ee8c19ffbc1a14377fcac19f.xlsx]

## Sheet: Supplementary Table 5, Tab 1
Supplementary Table 5. Source and sequences used during this study
Supplementary Table 5	comparative genomics ARKs - CPC
sources	sources for predicted proteome database
seq evolution ARKs + CPC	number and amino acid sequences for ARK1/Aurora, ARK2, ARK3, INCENP1/2, borealin, survivin genes across eukaryotes with a focus on alveolata, apicomplexa

## Sheet: Supplementary Table 5, Tab 2
Species name	Transcriptome/genome	Relevant Taxonomy Level	informal names	Database	link to file or sequencing project
Plasmodium berghei	genome	Plasmodiidae	hematozoans	PlasmoDB	http://plasmodb.org/common/downloads/release-40/PbergheiANKA/fasta/data/PlasmoDB-40_PbergheiANKA_AnnotatedProteins.fasta
Plasmodium chabaudi chabaudi	genome	Plasmodiidae	hematozoans	PlasmoDB	http://plasmodb.org/common/downloads/release-40/Pchabaudichabaudi/fasta/data/PlasmoDB-40_Pchabaudichabaudi_AnnotatedProteins.fasta
Plasmodium falciparum 3D7	genome	Plasmodiidae	hematozoans	PlasmoDB	http://plasmodb.org/common/downloads/release-40/Pfalciparum3D7/fasta/data/PlasmoDB-40_Pfalciparum3D7_AnnotatedProteins.fasta
Plasmodium gallinaceum	genome	Plasmodiidae	hematozoans	PlasmoDB	http://plasmodb.org/common/downloads/release-40/Pgallinaceum8A/fasta/data/PlasmoDB-40_Pgallinaceum8A_AnnotatedProteins.fasta
Plasmodium knowlesi	genome	Plasmodiidae	hematozoans	PlasmoDB	http://plasmodb.org/common/downloads/release-40/PknowlesiH/fasta/data/PlasmoDB-40_PknowlesiH_AnnotatedProteins.fasta
Plasmodium malariae	genome	Plasmodiidae	hematozoans	PlasmoDB	http://plasmodb.org/common/downloads/release-40/PmalariaeUG01/fasta/data/PlasmoDB-40_PmalariaeUG01_AnnotatedProteins.fasta
Plasmodium ovale curtisi	genome	Plasmodiidae	hematozoans	PlasmoDB	http://plasmodb.org/common/downloads/release-40/PovalecurtisiGH01/fasta/data/PlasmoDB-40_PovalecurtisiGH01_AnnotatedProteins.fasta
Plasmodium vivax	genome	Plasmodiidae	hematozoans	PlasmoDB	http://plasmodb.org/common/downloads/release-40/PvivaxP01/fasta/data/PlasmoDB-40_PvivaxP01_AnnotatedProteins.fasta
Plasmodium yoelii	genome	Plasmodiidae	hematozoans	PlasmoDB	http://plasmodb.org/common/downloads/release-40/Pyoeliiyoelii17X/fasta/data/PlasmoDB-40_Pyoeliiyoelii17X_AnnotatedProteins.fasta
Haemoproteius columbae	genome	Plasmodiidae	hematozoans	PlasmoDB
Hepatocystis sp.	genome	Plasmodiidae	hematozoans	PlasmoDB
Theileria annulata	genome	Babesidae	hematozoans	PioplasmaDB	http://piroplasmadb.org/common/downloads/release-40/TannulataAnkara/fasta/data/PiroplasmaDB-40_TannulataAnkara_AnnotatedProteins.fasta
Theileria equi	genome	Babesidae	hematozoans	PioplasmaDB	http://piroplasmadb.org/common/downloads/release-40/TequiWA/fasta/data/PiroplasmaDB-40_TequiWA_AnnotatedProteins.fasta
Theileria orientalis	genome	Babesidae	hematozoans	PioplasmaDB	http://piroplasmadb.org/common/downloads/release-40/TorientalisShintoku/fasta/data/PiroplasmaDB-40_TorientalisShintoku_AnnotatedProteins.fasta
Theileria parva	genome	Theileriidae	hematozoans	PioplasmaDB	http://piroplasmadb.org/common/downloads/release-40/TparvaMuguga/fasta/data/PiroplasmaDB-40_TparvaMuguga_AnnotatedProteins.fasta
Babesia bigemina	genome	Theileriidae	hematozoans	PioplasmaDB	http://piroplasmadb.org/common/downloads/release-40/BbigeminaBOND/fasta/data/PiroplasmaDB-40_BbigeminaBOND_AnnotatedProteins.fasta
Babesia bovis	genome	Theileriidae	hematozoans	PioplasmaDB	http://piroplasmadb.org/common/downloads/release-40/BbovisT2Bo/fasta/data/PiroplasmaDB-40_BbovisT2Bo_AnnotatedProteins.fasta
Babesia microti	genome	Theileriidae	hematozoans	PioplasmaDB	http://piroplasmadb.org/common/downloads/release-40/BmicrotiRI/fasta/data/PiroplasmaDB-40_BmicrotiRI_AnnotatedProteins.fasta
Cytauxzoon felis	genome	Theileriidae	hematozoans	PioplasmaDB	http://piroplasmadb.org/common/downloads/release-40/CfelisWinnie/fasta/data/PiroplasmaDB-40_CfelisWinnie_AnnotatedProteins.fasta
Nephromyces	metatranscriptome	Nephromycida	nephromycida	Muñoz-Gómez et al. 2019 (GBE)	see paper
Cardiosporidium cionae	transcriptome	Nephromycida	Nephromycida	Hunter et al. 2021 (Fr. in Microbiology)	https://www.frontiersin.org/journals/microbiology/articles/10.3389/fmicb.2020.580719/full
Toxoplasma gondii ME49	genome	Sarcocystidae	coccidians	ToxoDB	http://toxodb.org/common/downloads/release-40/TgondiiME49/fasta/data/ToxoDB-40_TgondiiME49_AnnotatedProteins.fasta
Hammondia hammondi	genome	Sarcocystidae	coccidians	ToxoDB	http://toxodb.org/common/downloads/release-40/HhammondiHH34/fasta/data/ToxoDB-40_HhammondiHH34_AnnotatedProteins.fasta
Neospora caninum	genome	Sarcocystidae	coccidians	ToxoDB	http://toxodb.org/common/downloads/release-40/NcaninumLIV/fasta/data/ToxoDB-40_NcaninumLIV_AnnotatedProteins.fasta
Sarcocystis neurona	genome	Sarcocystidae	coccidians	ToxoDB	http://toxodb.org/common/downloads/release-40/SneuronaSN3/fasta/data/ToxoDB-40_SneuronaSN3_AnnotatedProteins.fasta
Besnoitia besnoiti	genome	Sarcocystidae	coccidians	Uniprot	https://www.uniprot.org/proteomes/UP000224006
Cystoisospora suis	genome	Sarcocystidae	coccidians	ToxoDB	http://toxodb.org/common/downloads/release-40/CsuisWienI/fasta/data/ToxoDB-40_CsuisWienI_AnnotatedProteins.fasta
Eimeria acervulina	genome	Eimeriidae	coccidians	ToxoDB	http://toxodb.org/common/downloads/release-40/EacervulinaHoughton/fasta/data/ToxoDB-40_EacervulinaHoughton_AnnotatedProteins.fasta
Eimeria brunetti	genome	Eimeriidae	coccidians	ToxoDB	http://toxodb.org/common/downloads/release-40/EbrunettiHoughton/fasta/data/ToxoDB-40_EbrunettiHoughton_AnnotatedProteins.fasta
Eimeria falciformis	genome	Eimeriidae	coccidians	ToxoDB	http://toxodb.org/common/downloads/release-40/EfalciformisBayerHaberkorn1970/fasta/data/ToxoDB-40_EfalciformisBayerHaberkorn1970_AnnotatedProteins.fasta
Eimeria maxima	genome	Eimeriidae	coccidians	ToxoDB	http://toxodb.org/common/downloads/release-40/EmaximaWeybridge/fasta/data/ToxoDB-40_EmaximaWeybridge_AnnotatedProteins.fasta
Eimeria mitis	genome	Eimeriidae	coccidians	ToxoDB	http://toxodb.org/common/downloads/release-40/EmitisHoughton/fasta/data/ToxoDB-40_EmitisHoughton_AnnotatedProteins.fasta
Eimeria necatrix	genome	Eimeriidae	coccidians	ToxoDB	http://toxodb.org/common/downloads/release-40/EnecatrixHoughton/fasta/data/ToxoDB-40_EnecatrixHoughton_AnnotatedProteins.fasta
Eimeria praecox	genome	Eimeriidae	coccidians	ToxoDB	http://toxodb.org/common/downloads/release-40/EpraecoxHoughton/fasta/data/ToxoDB-40_EpraecoxHoughton_AnnotatedProteins.fasta
Eimeria tenella	genome	Eimeriidae	coccidians	ToxoDB	http://toxodb.org/common/downloads/release-40/EtenellaHoughton/fasta/data/ToxoDB-40_EtenellaHoughton_AnnotatedProteins.fasta
Cyclospora cayetanensis	genome	Eimeriidae	coccidians	ToxoDB	http://toxodb.org/common/downloads/release-40/CcayetanensisCHN_HEN01/fasta/data/ToxoDB-40_CcayetanensisCHN_HEN01_AnnotatedProteins.fasta
Eleutheroschizon duboscqi	transcriptome	Protococcidiorida	protococcidian	Janouškovec et al 2019 (Elife)	see paper
Rhystidis sp.1	transcriptome	Marosporida	marosporida	NCBI	SRR9888046
Rhystidis sp.2	transcriptome	Marosporida	marosporida	NCBI	SRR9888045
Merocystis kathae	transcriptome	Marosporida	marosporida	Mahtur et al. 2021 (GBE)	https://data.mendeley.com/datasets/rrdc4xsk2h/3
Margolisiella islandica	genome	Marosporida	marosporida	Mathur et al. 2021 (GBE)	https://data.mendeley.com/datasets/rrdc4xsk2h/3
Cryptosporidium andersoni	genome	Cryptosporidia	cryptosporidians	CryptoDB	http://cryptodb.org/common/downloads/release-40/Candersoni30847/fasta/data/CryptoDB-40_Candersoni30847_AnnotatedProteins.fasta
Cryptosporidium muris	genome	Cryptosporidia	cryptosporidians	CryptoDB	http://cryptodb.org/common/downloads/release-40/CmurisRN66/fasta/data/CryptoDB-40_CmurisRN66_AnnotatedProteins.fasta
Cryptosporidium hominis	genome	Cryptosporidia	cryptosporidians	CryptoDB	http://cryptodb.org/common/downloads/release-40/ChominisTU502/fasta/data/CryptoDB-40_ChominisTU502_AnnotatedProteins.fasta
Cryptosporidium meleagridis	genome	Cryptosporidia	cryptosporidians	CryptoDB	http://cryptodb.org/common/downloads/release-40/CmeleagridisUKMEL1/fasta/data/CryptoDB-40_CmeleagridisUKMEL1_AnnotatedProteins.fasta
Cryptosporidium parvum	genome	Cryptosporidia	cryptosporidians	CryptoDB	http://cryptodb.org/common/downloads/release-40/CparvumIowaII/fasta/data/CryptoDB-40_CparvumIowaII_AnnotatedProteins.fasta
Gregarina niphandrodes	genome	Gregarinasina	archigregarine	CryptoDB	http://cryptodb.org/common/downloads/release-40/CparvumIowaII/fasta/data/CryptoDB-40_Gniphrandrodes_AnnotatedProteins.fasta
Polyrhabdina sp.	transcriptome	Gregarinasina	archigregarine	NCBI	SRR9888044
Monocystis agilis	transcriptome	Gregarinasina	archigregarine	Mathur et al. 2019 (Current Biology)	see paper
Lecudina tuzetae	transcriptome	Gregarinasina	archigregarine	Mathur et al. 2019 (Current Biology)	see paper
Pterospora schizosoma	transcriptome	Gregarinasina	archigregarine	Mathur et al. 2019 (Current Biology)	see paper
Selenidium pygospionis	transcriptome	Gregarinasina	eugregarine	Janouškovec et al 2019 (Elife)	see paper
Cephaloidophora bamfield	transcriptome	Gregarinasina	eugregarine	Mathur et al. 2023 (MBE)	see paper (SRR9888050)
Heliospora caprellae	transcriptome	Gregarinasina	archigregarine	NCBI	SRR8980202 & SRR8980203
Ancora sagitata	transcriptome	Gregarinasina	archigregarine	NCBI	SRR9888051
Colpodella angusta	transcriptome	Chrompodellida	chromopodellids	Janouškovec et al 2015 (PNAS)	see paper
Colpoda aspera	transcriptome	Chrompodellida	chromopodellids	Janouškovec et al 2015 (PNAS)	see paper
Chromera veila	genome	Chrompodellida	chromopodellids	CryptoDB	http://cryptodb.org/common/downloads/Current_Release/CveliaCCMP2878/fasta/data/CryptoDB-39_CveliaCCMP2878_AnnotatedProteins.fasta
Piridium sociabile	transcriptome/genome	Chrompodellida	chromopodellids	Mathur et al. 2019 (Current Biology)	see paper
Vitrella brassicaformis	genome	Chrompodellida	chromopodellids	Uniprot	ftp://ftp.uniprot.org/pub/databases/uniprot/current_release/knowledgebase/reference_proteomes/Eukaryota/UP000041254_1169540.fasta.gz
Platyproteum vivax	transcriptome	Squirmida	Squirmida	Mathur et al. 2019 (Current Biology)	seepaper
Digyalum oweni	transcriptome	Squirmida	Squirmida	Janouškovec et al 2019 (Elife)	see paper
Perkinsus marinus	genome	Eukarya	dinoflagellate-related	Ensembl	ftp://ftp.ensemblgenomes.org/pub/release-34/protists/fasta/protists_alveolata1_collection/perkinsus_marinus_atcc_50983/pep/
Symbiodinium sp	genome	Eukarya	coral dinoflagellate	Eukprot	https://ftp.ncbi.nlm.nih.gov/genomes/all/GCA/003/297/005/GCA_003297005.1_SymA_ver_1.0/GCA_003297005.1_SymA_ver_1.0_genomic.fna.gz
Tetrahymena thermophila	genome	Eukarya	ciliate	ciliateDB	http://www.ciliate.org/system/downloads/4-upd-Protein-fasta-2021.fasta
Stentor coeruleus	genome	Eukarya	ciliate	NCBI	https://ftp.ncbi.nlm.nih.gov/genomes/all/GCA/001/970/955/GCA_001970955.1_ASM197095v1/GCA_001970955.1_ASM197095v1_protein.faa.gz
Arabidopsis thaliana	genome	Eukarya	vascular plant	Ensembl	ftp://ftp.ensemblgenomes.org/pub/plants/release-34/fasta/arabidopsis_thaliana/pep/Arabidopsis_thaliana.TAIR10.pep.all.fa.gz
Giardia instestinalis	genome	Eukarya	diplomonad	GiardiaDB	http://giardiadb.org/common/downloads/release-29/GintestinalisAssemblageAWB/fasta/data/
Trypanosoma brucei	genome	Eukarya	kinetoplastid	TriTrypDB	http://tritrypdb.org/common/downloads/release-5.0/TbruceiTREU927/fasta/data/TriTrypDB-5.0_TbruceiTREU927_AnnotatedProteins.fasta
Dictyostelium discoideum	genome	Eukarya	slime mould	DictyBase	http://dictybase.org/db/cgi-bin/dictyBase/download/download.pl?area=blast_databases&ID=dicty_primary_protein.gz
Saccharomyces cerevisiae	genome	Eukarya	baker's yeast	Ensembl	ftp://ftp.ensemblgenomes.org/pub/fungi/release-34/fasta/saccharomyces_cerevisiae/pep/Saccharomyces_cerevisiae.R64-1-1.pep.all.fa.gz
Homo sapiens	genome	Eukarya	human	Ensembl	ftp://ftp.ensembl.org/pub/release-87/fasta/homo_sapiens/pep/

## Sheet: Supplementary Table 5, Tab 3
Species name	supergroup	level 1	level 2	level 3	level 4	ARK1/Aurora			ARK2			ARK3			Borealin			Survivin			INCENP
						N	seq	comment	N	seq	comment	N	seq	comment	N	seq	comment	N	seq	comment	N	seq	comment
Plasmodium berghei	SAR	Alveolata	Apicomplexa (sensu stricto)	Aconoidasida	Haemosporida	1	MNESASSPIKATCRDMALKSSLHSFTFSLKDFDIAGFLGDGAHGSVFLACERRTNFICVLKCISKSHLVKSTQEALLRKEIELQAHLKHPHIACMYTWFHTSSHVFFVMEYCSNGDLFTYLNEHGPFSEKKVATMLFEIIWAIRTCHDKRIAHLDLKPENVLVNHEEKCKLADFGLSAHIGSKHKKKGISHYRGTHDYWSPEQCARHQKKKKNFGEFDQKTDIWTLGILAFELKFGRPPFGSTNEEREDIIMNRIQDYHWSQLFSEKVKQDLIDKLSPEFKNFLNLCLDKNPKKRPTAEELIQHPFIFIHNKNRPCIKSYATQPRGKQGPKLSHKGFNEQDGSFLTPIWFHNK	GISH, not RxT	1	MNENIKSHNYLKEKNILNKNPSNLVNADILKFNTNIKKNNNVERFYHDKVSDSSNMYNKNGRHINKSVGAEKNVSGNKTTNLVNIKNNNQRFFSKSENEKCVIRNINMREDNYTTNIIKGEDNDIINNRKNANISNNERLYLKSSDDKLTKNINTSRYEYENILGDNNNNNNGNGIRNDIEKDNNGNNNGYYSYNCKNLKKSKEPNNSLDSFYKRKREMEEETYDKKRINNSLNKDYYYNTYTKTDINDSRMNIKDIKIKDISENISKIKNLQNDILNVKNTEKARSMVHNISESEKKMFNTINHSNNSTEILSLHSFNTNESCNYDKYVKDIFNKNYDYKKIKNPENSYLEAGENIISRSCTIEKEQINNSDDFIRRNFMYDNKFETKINETKSNKFE…	-	1	MNGRNMHSYYLDKIQKNVNQIKRCNNMSLLRNINERSYNLNNNKITNYVDIKESNPNNATNGFSNEYTYNQNINSVLNRGKYIINNNGHIKEDINANYDYNSYVNKCKNFPDKIASENSHYNYDTIRTETNNNLKDLRNDQYSYNNSKAVYDQNKGVIINNPCYSKIKDCNKIYLDNINETVNENNHMFENYHNGHIRMNASVLCPSHLKNNSIKQAHNQNELKQNNNMEMVYDGYYNNNDRIYMNDNIYNKNLNYKIHGDFINIKNNINDSKAVQYMPVYLPHNEKMNKEYKYGLRTGDYLNQNIQTGIYNNNNNLCTNVENINHISKNISSSETNKNNYFTQEHPYIENDLRHHFVEDNYSRSLINIKNNNCSKSTNIKKHNIYIPNKESALLNNSE…	-	-	-	-	-	-	-	2	MNTFVENGDINKNEKECGHNNDNIFRVIPKKLLNSSNIIHVKKEDKDYILVDKKNGNISKSENIEICLKKNMHITYNKEIKKNGEKKNPDKLLKFSETRKICKNFNYNKYYERVKKWKEKRCPKLKEQNNFIKIGKIKINKKNGAKIESKQNKYKKAIKQNSVIYGIIQKREKQITKLDSNNPHPNQINQEKETKANDEIKSNNINNMKLEKCINHQNNDKGNICTNTKFNGICKEINYNNLSHTYRNIEISNETNINIPYSNKTFMDSFNNLNFLNNNSNNPTIILSSNETNTVDFENNYFLNMNDENMIQIKKYINSIDQTKYTFDHLYPRKVFTEDIFDELTKKNNQNKSNTYEQPFLTIYNPYSHINITSEKVIKKETHNLINGAIKTSIYKERN…	INCENP1-INCENP2
Plasmodium falciparum 3D7	SAR	Alveolata	Apicomplexa (sensu stricto)	Aconoidasida	Haemosporida	1	MNDSISSPIKATCRDMALKSSLHSFTFSLKDFDIAGFLGDGAHGSVFLACERRTNFICVLKCISKSHLVKSTQEALLRKEIELQAHLKHPHIACMYTWFHTSSHVFFVMEYCSNGDLFTYLNENGPFCEKKVAEMLFEIIWAIRTCHDKRIAHLDLKPENVLVNHEEKCKLADFGLSAHIGSKHKKKGISHYRGTHDYWSPEQCARHQKKKQNFGEFDQKTDIWTLGILAFELKFGRPPFGSTNEERENVIMNRIQDYHWSQLFCEKVKQDLIDKLSPEFKDFLNLCLDKNPKKRPTAESLIQHPFIFIHNKNRSCIKSYATQPRGKQGPKLSHKGFNEQDGSFLTPIWFHNK	GISH, not RxT	1	MNEHIKSFKNDNVHYTKKNVIRNYDDHNNIKANSHLKLQSKEYTTHNDEKQRWITSNNTNNNIQTHANVKCDDKSVENKTTTLINKDINEITNISKQDKNYTKYNCLNFNKSDVMRDYVRYSKKEDSSSNNMNGNNNMNGNNNMNGNNNMNGNNNMNGNNNMNGNNNMNGNNNMNDNNNMNGNNIMNGNNIMNGNNNINRNNIMNGNNIMNGNNNINRNNIMNRNNITNNHIIHHISNKTSLIENNKKKEENIFPSANLYKKEMNVKGSSDTFDLLYKRKIDKDDNLSKKKKRPNYLFNKDGEHFVNKENVQNNIIDDDDDDDDDNHHDNVVVVYDKVKENEMNENKNKKSVKEDGLHNVLVELRNKDNLVVNDNIINKSFEKNNILYIKTSDSLNENY…	-	1	MKDYYMDKIKKNINEIKKYQNINILEKTNETNNAFFYENKNVTLKYNEEQKYKKTEDIISNISTDKKDIKNNNCNNISNDEYVRIENGPKNNYVSYNNNKIINNDNEKYDNIYNNYGSVIHKLNVQDMNNIPNQNYNNNVVISTKKNKNDVIYNIPYNTNSFIDTKQNMNINNDVGTKYYLDNNKNGYIMNENINYDIENKMTNTLNDINKCVHVNRNDFSYYLNIKDGNKIEDDNATYTHYINNSNIHQYDNTTNNTFYNKKCDEQYYDKCESGTRINKINEKYINEHFNNNGSDGDNIYFHKLLSHKNSNEKKYVFQEKIEKRNNDKYKYCYNDKDKDISSYMVNKENYNGNKDLDILNNYYQMKNNLLSNKNNIYIINSNNQKRDLSLQNKEDEKI…	-	-	-	-	-	-	-	2	MCEKSQKSQNSPEQNGDNVELFRKKNIEVTCITNNTTKKYIKKKTNKHLLYNNKEKHINNEESKILSLQKKQKQKKNKKNVYRFDYIKYYERVRKWKEKRYGHDYEKKKTITRQEKELPHHTKNHHQKKKNKIVQKNDINKNITIYKNYIGSNDQIITCEEGYKDVVNCVQQYKHVEKNNKKENKIYQHSYNINNEHYLNNYTPYIEPPNRNNNNNNNNMRGVSIINNIYNNLNNIDILKSSETILLQDQNKINFSNKTIISSFQDMESFQNLNCEDDEDKYNDIDIIPMSNDTHIHHPLMINDLTHFCNKYNYVSLKNKMIFYPYNYDNNKYKRFSLPYFRFTSIGRNGTIQKPKSDEYINKQKKKSKDIDYFKNQYDEKHFDLKKTFVNNYLDENKI…	INCENP1-INCENP2
Plasmodium chabaudi chabaudi	SAR	Alveolata	Apicomplexa (sensu stricto)	Aconoidasida	Haemosporida	1	MNESVSSPIKATCRDMALKSSLHSFTFSLKDFDIAGFLGDGAHGSVFLACERRTNFICVLKCISKSHLVKSTQEALLRKEIELQAHLKHPHIACMYTWFHTSSHVFFVMEYCSNGDLFTYLNEHGPFSEKKVATMLFEIIWAIRTCHDKRIAHLDLKPENVLVNHEEKCKLADFGLSAHIGSKHKKKGISHYRGTHDYWSPEQCARHQKKKQNFGEFDQKTDIWTLGILAFELKFGRPPFGSTNEEREDVIMNRIQEYHWSQLFSEKVKQDLIDKLSPEFKSFLNQCLDKNPKKRPTAEELIQHPFIFIHNKNRPCIKSYATQPRGKQGPKLSHKGFNEQDGSFLTPIWFHNK	GISH, not RxT	1	MNENIKSHNYLKEKNVLNKNTSNLVNDDILKFNTNIKKNNNVERFYHDQIGDSNNMYNKNGHHINKSVGGEINISGNKSTNLVNIKNNNQRFFSKSENENYVIRNPNMREDNYTTNIIKGKDNDTVNNRKNANINNNEYLYFKNSDDKLIKNMHTSGYADQNILRDNNNWNGNRNDIEKDNNITNNEYYSYNCKTMKKFKEPNNSLDSFYKRKREMEEETYEKKRVNHSLNKDYYYNTYKKTDINDSRMNIKYMHIKDMPEDISKIKNLQNDIMNVKNMEKTQSRVHNISESEKSLYSIINQSSNDSTKTHNPHSYNTNENCNYYYKKVNNSENSYLEADENVIPRSCKIEEEKINNNDNFVRRNFMYDNKLIDTNKNHQYYEDKSEEQYGTRTILNKE…	-	1	MNGRNMHSYYLDKIQKNVNQIKRSNDMSLLNNMNEGRYHLNNKKNTNYVDINESNPNNAKNGFANEYTYNQNINYEQNENINSALNRGKYIMYNNGHIKEDINTNYDYNNYVNKYKNFPDKITSENNHYNYDTIRTETNNILKDLRNVQYPYNNPKVVHDQNKGLIINSPCYSKINDCNQIYLANINENNHMFKNCHNGHMRMNASVLCPNHLKNNSIKQGYNKNELRKNNNIEMVYDGYYNSNDRTYMRNNMHNKNLDYKIHGDFININDNKIAQYAPVYLPHDKKMNKEYNYALRAGEHLNQPVHTGFYGNNNMRNNVEHINNISKNISSSETNKNNYFMQEPSYIENDLRQHIVENNYNRSLINITNNNCSKSTNIKKQSIYIPNKEHTLLNNSEI…	-	-	-	-	-	-	-	2	MMNNFVENDDTNQSGKECGHNNDNIFRVIPKKLLNSSNIIHVKKEDKDYILVDKKNAKINKSENIEICLKNNMPINYNKELKKNAEKFLKSSETRKICKNFNYNKYYERVKKWKEKRCPNFKGQNSFIKIGKIKINKRNAVKIETKHDKYKKNIKQKYPIYGVIQKSEKNMNKLDVSKGQAHQPKQGKNTEADSETKSNYANNMKLENCINNQNGDKNNICNNTKFKDICKETNYNNLSYIYKNFGTSNETFMDSFNNFNFLNNNFNNPTIVLPSNETSASDFENNYFLNIIDENMIKKKININTTGQTIYHFDNLYPRNVFTENTFDELTKKDNQNKSSTYEQAFLNIYNPPSHTNINSEQVIKKEPHNLINGPIKTSIYKERNVVNNKSIEYNDSNN…	INCENP1-INCENP2
Plasmodium gallinaceum	SAR	Alveolata	Apicomplexa (sensu stricto)	Aconoidasida	Haemosporida	1	MNDSISSPIKATCRDMALKSSLHSFTFSLKDFDIAGFLGDGAHGSVFLACERRTNFICVLKCISKSHLVKSTQEALLRKEIELQAHLKHPHIACMYTWFHTSSHVFFVMEYCSNGDLFTYLNEHGPFSEKKVAEMLFEIIWAIRTCHDKRIAHLDLKPENVLVNHEEKCKLADFGLSAHIGSKHKKKGISHYRGTHDYWSPEQCARHQKKKQNFGEFDQKTDIWTLGILAFELKFGRPPFGSTNEERESIIMNRIQDYHWSQLFCEKVKKDLIDKLSPEFKDFLNLCLDKNPKKRPTAESLIQHPFIFIHNKNRPCIKAYATQPRGRQGPKLSHKGFNEQEGSFLTPIWFHNK	GISH, not RxT	1	MDEKNVKITSYEKIEDRQKNKIKSYINDNIKISTNIRLHQNEIISSNEKKNKLYNSNSINKIQSNINVENDKNSLSNKIIDFTQNKKVLENLSKDEYNDKNDTKKKNTKCNIIMKNKNNLINDYSNSNKKVDYSKNNKKCLLYKENKNIEKYNCDSEKGNIIPSNDLITYKNDLNLNHKRKIDTEGKLSNKTNIHKCKFKKYDFINSNSYNNSNTIIKFREMSNINNKNVKHNNNGFYEKKGIMQDNLDKGSLEEMNKEIPSLSNKSTFTDKKSEEKLQPNDLKSNMEYLNNNDTYNQNKNKGAESKYTDNSLQNYSDTKSNNLKYIKKVYNYDDEKYIKNKSIGNNIIPSTIHQRNDEKTKLNKNFLNEEKWIFKNKINVNDNYLKNKNKYKKSNELN…	-	1	MQGINMQEYYLDKIQKNISQIKKSQNICLYQSIHEDDFNVNNNYILNRFKEYNNVSNTKNTYVLDENNSKPISHERNLSMERILNGQYINNNNFSDEVINNYNEYYNPYNNKINNNEYANPLYLSNNSVPNKDVNENMLKHESFKYCKNKLIMDNSVNNSNNTVTEKINNFTEIEGNQCFNNSLLNNAKLINYKTNKSINKSYIKSDEIYNRKNINITNSIPTNKSIFTNYPDKKDEMNNNITLLSHINNGNNNLFQNKITCYENKNTKKKSDIYEYFTNQNYIHNNLDKINIKNIDKNCKDYVNLNYSKSHISQDIFHEIHSKNFEVNSLGNYNIKINENKNSLNNIPSCEGNDIVIKSENVYDTEKTTKNISIQDNNIDFSLQRCSSENTQKSGINN…	-	-	-	-	-	-	-	2	MRRSINEKRDTISLNRKIDTNIQKSISKYCVTSKRKYNFQRIKKYKHKFKENLEYTKMKNNLKNNIHTINRQRTNLKKTVCKDDILNKNNINSKFSINNIKKEGNSEKEKENYKMCKNDNVFDYKKYYERVDQWKKKRCIYFNNENKIKKKEIHLENKKRSLREILNITEPKKNTKRNCNKYESSLNQQKTTNKTINKLNEIQLKKKNVKSSKNEININNYINYNDINGNNENNYDKYKKNVVPIYDSGNYQGYNIDNKTDNISNNYINYSNNNNRHEIISHNNSPSFKLPNNKIRITNKNKRNIYCIGKIKSSDTMLENEEKNIYSNKTITDTFDYIDCFNNFATNPTFLIKSNETIFHAPLKSNLNNVENKSNFNLFDKTNIKKSYTNYSTKVRTIP…	INCENP1-INCENP2
Plasmodium knowlesi	SAR	Alveolata	Apicomplexa (sensu stricto)	Aconoidasida	Haemosporida	1	MNESVSSPIKATCRDMALKSSLHSFTFSLKDFDIAGFLGDGAHGSVFLACERRTNFICVLKCISKSHLVKSTQEALLRKEIELQAHLKHPHIACMYTWFHTSSHVFFVMEYCSNGDLFTYLNEHGPFPEKKVAEMLFEIIWAIRTCHDKRIAHLDLKPENVLVNHEEKCKLADFGLSAHIGSKHKKKGISHYRGTHDYWSPEQCARHQKKKQNFGEFDQKTDIWTLGILAFELKFGRPPFGSTNEERESVIMNRIQDYHWSQLFCEKVKEDLIDKLSPEFKDFLNLCLDKNPKKRPTAESLIQHPFIFVHNKSRPCIKSYATQPRGKQGPKLSHKGFNEQDGSFLTPIWFHNKG	GISH, not RxT	1	MNRHRPMNDHVNINNKRFHDDGTTKRRNRNTHSEQPHQVDKSHNERKINSAQTVMYSSRTLGGKNPQCEEVDTTTKRANLLSAQRQLHNISSKTEKEKREIKRDLLLRRGDYYSQGTKTTHIRSPEFCDEKFKRENRLNCSGRKTEPSSTIRTQLTHRRDVLVRSNKNNNISCDSVCKRKVDWDDELENKKLKPSHSHGKSGHVIGSAISFDKVENTEVHKRGEEAEDPRRRGTGEDAYFSSIGRKLPIGEQKRRNELSGGNLGMNRSGEEKERMRPCVSGKTSEGTSLVIEERRGESFSFASCVNDKVEDGPLNARSRGEHLLGVHIKPGQHISHGSYVEVMNDDGNPSLGTIPKSAPANNEEVDGSIGYKERGGMEEKDVSGGHTDQREDPLNRNIP…	-	1	MQQYYMDRIKKNISQIKKSKNISLPQNVHEGIFSISDNYPTNRIDGQEYKSSDTKDVHISGNKDHVIIRYDNDMKMEEIPWERPPIHTKYIVTGDTNFYENYVTDYPNEQSTNDWIYQLHGLSNGQTGYVHEYVIWDEKLKQYKTIVTSPSFVHNSNNITVEKGSDNYSGIIDSHCFYDSSMNNTKLISQGENKKVASNVSAPYEKSEHNNREKLHTFNNSVCRNKNDVNGFFDQKICSSSGIPFSNCVRNVSSTSCYERRGCSKSGIPQRGYDPYGHPHPSGHIIHTNCSSHILGENRRNYTGNLPNSVIMNVDHSGHTSTGRGIFREASLSSCTRRDVIGKGILKNGELKTAACCLGRIVNSDRRKHITSNDGESLKKKVHYQSGKIHFSFGDHKSV…	-	-	-	-	-	-	-	2	MLVITENTFEKTNNPKYPRGSKVSIKRNNSQVKVISNRITPYCGDITKSKRELIKTRKFIKESDKIKYHYLYARKHLCHGKYARKIKLVSVEKKKNFNHLEKFPKSRKKKYQVIARRVNYNVILKNSYIKNVPSGRNSFLVHLKGKRRKSHIKRSARKNFISVREAALEKAKDIGGRQVPSLHPLSDEFHFKVKTNHHHVTSKNVAKNQHSYDVEANSANLDGISANNSTLDMVTVVLNREKQHPNWHLNRHPTRKALFNTCSMRTLTTNSLIDSIISLSNELNKTNEKKDDSKDEYDKSVLHYVNKILSDHNFHYDIVSSVNKNEIKELKKKVKKYNDIPKFYFRKLFKYIGEKNESSRMCGNYLHTTHCYNSDCDVHYDDRDRSNSCKRGNNDYMHD…	INCENP1-INCENP2
Plasmodium malariae	SAR	Alveolata	Apicomplexa (sensu stricto)	Aconoidasida	Haemosporida	1	MNDSISSPIKATCRDMALKSSLHSFTFSLKDFDIAGFLGDGAHGSVFLACERRTNFICVLKCISKSHLVKSTQEALLRKEIELQAHLKHPHIACMYTWFHTNSHVFFVMEYCSNGDLFTYLNEHGPFAEKKVAEMLFEIIWAIRTCHDKRIAHLDLKPENVLVNHEEKCKLADFGLSAHIGSKHKKKGISHYRGTHDYWSPEQCARHQKKKQNFGEFDQKTDIWTLGILAFELKFGRPPFGSTNEERENIIMNRIQDYHWSQLFCENVKQDLIDKLSPEFKDFLNLCLDKNPKKRPTAESLIQHPFIFVHNKNRPCIKSYATQPRGKQGPKLSHKGFNEQDGSFLTPIWFHNK	GISH, not RxT	1	MNEGTKGVNYEKIEDAQKPKKKKKNYVDDNIFKINTNIKVKHNEAKSYMDKRYNFPNSISRNKTPRYKNVNSEKRFLTSRTTNLVNKNKNSLCNFSKNERDEKSKENNEAIEMKNAFTNNSSRGNNKSTCSHNQPIYVRCGKSNSSDVKDTSISTSTGSRMKTKNNEHFIGEKVGNILNNSGKTNIISAAEHSRIRYKSDMNVMDDTNHMNDTNHMDDTNHMDDMNHMDGMNHMNDMNHMNDMNHMNDMNHIEVMNHMDNMNHMEDINKVHDMFDVNVKRSNNKGLDSFYKRKMEREEALDGQNKKCNYSLDKYGCSYNRDANRSGNYLNANMNRENAERSKGNTEKMRMLRMNHMDGAVAQKVGMEIEAVEVVGVKAIEAVEAEVEAGERMKDEEGAD…	-	1	MKDVNAQNIYTQNVNVQNVNMQKYYFDKIKENIKQIKKSQNANLLQNINEGNINLHNNYISNTIDTKQNNQNEAKHIFVKDMQTNGSIECDQNLRIKKDLEEKKKYLIYYNYNCKENINDYENNYNIYKNYFNKNQPMDQPYIMSNNSVIQNNVNKENIPRNGTSKNSKNKFTSGVIGNSLNNITIEKNTNFNDMGDTHWFYNSCFNTAKLIKYQGEKRTASNMYYEKEPVNNTCYEKKSVSNTCYKTKTYSSKPYATKSVSSTRYGTNPMSGTRYATNPTINMSHEKKSEGNCYKINLNAINNKIIGKNKNILKDCFDQELNLNNNFSFQNSLRNKSDRLFFYTNYASPKGQVAERNYEEYGEDIINKKCVNNQLDKKNKVYMDNISNENVINLSYSK…	-	-	-	-	-	-	-	2	MKSNLRVRYNIHFNRNPCALTHEKTNEKIKTNANTITNTITKTQKCTSKKKHPLYKCKKEKSELKGHLPRKDTTQHIQHTEAEKQSKKNDSYVKILSNDNVESTHSMRISKGKEETHSKNQKKGSRKFDFKKYYQRVNTWQEKRRAYPSYEKEREKNDLQIGEINGLRNGRTNGLRNGRINGLRNGRTNGLRNGRINGLRNGRINGLKKVHNNYESKKKAKRKCGPCESSSYRHKRSKAIENKLSDKITQCNNKKNITEFTNRTINNKINTLCYEEDNHKRDNKNEKEEGTRIIMRSNNNYENQIFTSQYEDCNSHMNGASNIKLVKSNYNYDYDEKKHNDGSFLINHLINKVKNICKEEEGRNPKDVLQINSSETFLQNGGKLAYSNKTLIDSFSNSD…	INCENP1-INCENP2
Plasmodium ovale curtisi	SAR	Alveolata	Apicomplexa (sensu stricto)	Aconoidasida	Haemosporida	1	MNESSSSPIKATCRDMALKSSLHSFTFSLKDFDIAGFLGDGAHGSVFLACERRTNFICVLKCISKSHLVKSTQEALLRKEIELQAHLKHPHIACMYTWFHTNSHVFFVMEYCSNGDLFTYLNEHGPFSEKKVAEMLFEIIWAIRTCHDKRIAHLDLKPENVLVNHEEKCKLADFGLSAHIGSKHKKKGISHYRGTHDYWSPEQCARHQKKKQNFGEFDQKTDIWTLGILAFELKFGRPPFGSTNEERENVIMNRIQDYHWSQLFCEKVKNDLINKLTPEFKNFLNLCLDKNPKKRPTAEALIQHPFIFTHNKNRHCIKSYATQPRGKQGPKLSHKGFNEQDGSFLTPIWFHNSEAK	GISH, not RxT	1	MNENVKGNNYERAEDIQKRKKTTSEIVYGVFKAKTFIKPKQREVKSHSEQKMKVSYESSVSSKSHGNKPKRSIPQRSIPGRGIPQGNKRQGDIFAEQGVKDLKRKMTNLVDKKENMQGVFHKSELNSFPKYAQTAFAKDESTERDIMNCVSVRGNKDLSTNMKIDKEKNYFTTNGDHYNNMDHTEKDSERLNNEYNICEKKNEKLQNRLNSSTSKDAFPLNHNAAKHKDDIHIRRNNTSLDAFHKRKRERDEHVDNEKKKPTYSYNKEDYYSAANMYTHTNDVSMHLALNQRRGSNENIAQTGISRIDCMSKTSIIGGTKGEGIMLNDSMRSVFLTEKEKCPYNNNAPGSHHDDNTMCEKSTDVIKNSNIYAKSSGFYPEHDEEKKKKNSDLGHIKCRK…	-	1	MDDINTDSLHMQKYYMDKIKKNINQIKKSQNINLLQNIHEGNFNLSKNYISKDFDESAHNSNVDENTFVSDKERSRKIGCDKEVRTEQDSLWKKNVIRTNHNWKGHSSDYGNYCSVNKNYAAKEYINQYNVPKTNTIKKYNMNDNMLSSGNSKYCKNKIITPSGICSSGNFASEIRSNFSEVGNNQCLYNTCFSNAKLVNYFGNNKMVNNIHYKKSLEDASIKYVNVVNKSACENENILGDGHDAKIDVNNNIPFSRFATNNSNLLFYNKNGRQKNDKGEMNYGQYRRNISNPHINNGICNKSGKCVTNAYTGHNINADYSKGEPNYQGMSHLWSHKNDMRNNSTNNNTFKTENENCVFTMEEMNNIIGINGSASSIRKISENALIPQGKKDNICFGKY…	-	-	-	-	-	-	-	2	MGHNCERENHSNFNRKVDIEMYKNVKTNLFVPKKKPNLYKCTQKKDDVKENVEGIKISEYVQGEEIKISSQKNIGDSNIARDEGLLENLAMQEKKPINVYKQCKSFDYKKYYDRVKKWKEKRRSNRGPQIVKNTKTRMGENKNGNVICTYKGNVYKMNTKRKYTMYLARPILSTSRRKDSKVEINLGEKIQHTKKRKEVVHIVGTDEESTRGNYVNNRVKKCEKVDEKEKAAIAQMDADALGKINTRCKLDNAGEKNMDNRASSNNPRKIHPPNDSCKYDYDMTKHKGTFPTVTDMLINKTKEVNEQFRGYISSHIVNIRSNETVLENEEKIMYSNKTLMDSFNNFTSFSHFSENPTLILQSNEAGFANSKRRVNDVDEADEWEVNTQKVDLYTDGTKM…	INCENP1-INCENP2
Plasmodium vivax	SAR	Alveolata	Apicomplexa (sensu stricto)	Aconoidasida	Haemosporida	1	MNESVSSPIKATCRDMALKSSLHSFTFSLKDFDIAGFLGDGAHGSVFLACERRTNFICVLKCISKSHLVKSTQEALLRKEIELQAHLKHPHIACMYTWFHTSSHVFFVMEYCSNGDLFTYLNEHGPFAEKKVAEMLFEIIWAIRTCHDKRIAHLDLKPENVLVNHEEKCKLADFGLSAHIGSKHKKKGISHYRGTHDYWSPEQCARHQKKKQNFGEFDQKTDIWTLGILAFELKFGRPPFGSTNEERETVIMNRIQDYHWSQLFCEKVKQDLIDKLSPEFKDFLNLCLDKNPKKRPTAETLIQHPFIFLHNKSRPCIKSYATQPRGKQGPKLSHKGFNEQDGSFLTPIWFHNKG	GISH, not RxT	1	MNTQRPKNDHVRIKTKSCPDEDATNRRSRNDERPSQPEQPRQTERPSQTGQPPLERRVNSAHALIHPSRAAGGSNPQSQKADATTKRANLISVQRPPPSSFSKTEREKPNVNRGTIRRGDYPSQGNNTTHIRGANLCDEKFRAENRLNCSGRKTDPPSTIRTQLTQKRDVLVRPRNNNSWDSACKRKADREDALENKKKKPTHSHDRGGNAAEHLRRSGTNDGGEVAQAAHTADAAHSGSILPRGGLGRADLGMRPSGDGHAKMNRFAKGGTPERTSHATEERPGESLACTPSDDPEEESQKGGSRRDPPWGVPMKPRQHLSCGSYVEGANDDGNTTDGAIPQGGPPDSEELHETTKWREQRGGEERNVRERQANQREAPLHRGTPISEIREGDAKGKG…	-	1	MDDMHMQQYYMDKIKKNISQIKKSKNISLPQNVHEGNFSISEDYPPNRIDGQQHKANHTKDLPFRGNNNHVKIGYANDLKRKKEVPWEKPPMHSKYNVTGDSNFYENYVSGYNNELPTNDRLYQSHGASNGQAGYNRENVIWDEKLKQYKTNVISPNFLYTSNNRVVEKGSDIHGGAIDTHCFYNTCVNNAKLISHRGGQKVASNVSAPYGKSEPNNKEKLHTVSNSLCRNKNDVNGFFDEKVCSGSGISFSNCVRNVSSTSCYARRGNSKSGIAQGGYDLYGQPHPSGHMLHTNCSNNTLGGNKRNYTGNLPNNVIMNVDHSGNGSACRGIFREASIGSCTRRDAMDRGILKGGELKTPVYCLGGISNSDKRKQLTPNNGESLKSVVHTQGSKTHFGF…	-	-	-	-	-	-	-	2	MLVITENTFEKPNNPKYPRGSKVAIKRNNSQVKVISNRITPYCGDITKSKRELIKTRKFLKESDKIKYHYLYARKHLCNGEHERKIKLFSVEKTKNLNHLEKFSKIRKKKNQVIARRVNYNVILNNSYVKNVAYETNSFLVHLKGRKRKSHIRRSARKDCLTVREVALDKAKDIGGRQAPSLHPLRDSFHFKVKTNHHHVASQNVAKSKQFDDVEVNGADVDGIIANNSALDVLTVVVNRERQHPSSHLSRHLARKALLSARSMRKNAVNAANATNATDATNATNATHATSSLIDSIINLSNELNKTSEKKEESEHEYDRSVLRYVRRILSDHNFHYDIVSSAHKNEINELKRKIKKYNDIRNFYFRKLFKHIERRNESSRKRGNGLHTAHCYSSDYDV…	INCENP1-INCENP2
Plasmodium yoelii	SAR	Alveolata	Apicomplexa (sensu stricto)	Aconoidasida	Haemosporida	1	MNESASSPIKATCRDMALKSSLHSFTFSLKDFDIAGFLGDGAHGSVFLACERRTNFICVLKCISKSHLVKSTQEALLRKEIELQAHLKHPHIACMYTWFHTSSHVFFVMEYCSNGDLFTYLNEHGPFSEKKVATMLFEIIWAIRTCHDKRIAHLDLKPENVLVNHEEKCKLADFGLSAHIGSKHKKKGISHYRGTHDYWSPEQCARHQKKKQNFGEFDQKTDIWTLGILAFELKFGRPPFGSTNEEREDIIMNRIQDYHWSQLFSEKVKQDLIDKLSPEFKNFLNLCLDKNPKKRPTAEELIQHPFIFIHNKNRPCIKFYATQPRGKQGPKLSHKGFNEQDGSFLTPIWFHNK	GISH, not RxT	1	MNENIKSHNYLKEKNVLNKNPSNLVNDDILKFNTNIKRNNNVERFYHNKVSDSSNMYNKNGHHINKSVGAEKNISGNKTTNLVNIKNKNQRLFSKSENEKCVIRNINMREDNYTTNLIKGKDNDIINNRKNTNINNNEYLNLKSSDDKLTKNINTSGYAYENILEDNCNNNGNDIRNDIEKDNNGNNNGYYSYNCKNLKKVKEPNNSLDSFYKRKRETEEENYDKKRINHSLNKDYYYNTYTKTDINDSHMNIKDIQIKDISENVSKIKNLENNIMNVKNMEKARSRVHNISESEKKMFNIINQSSNNSTKILNSHSFNTNESCNYDKYMKDIFNKNYDYKKIKNPENSYLETDENIISRSYKIEEEHINNSDDFIRRNFMYDNKLETKINETKSNKLE…	-	1	MNGRNMHNYYLDKIQKNVNQIQRSNNMSLLKNMNERNHNLNNKKIINYIDIKGTNPNNATNGFFNEYTYNQNIDSVLNRGKYIIYNNGHIKEDINANYDYNSYVNKCKNFPNRIASENSHYNYDTIRTETNNNLKDLRNDQYPYNNSKIVHDQNKGLIINNPCYSKIKDCNKIYLANINENNHMFENYHNGHIRMNASVLCPSHLKNNSIKQAHNQNEVKKNNNMEMVYDGYYNNSDRIYMNDNIYNKNLDYKIHGDFINIKNNINDSKAAQYMPVYLPHNEKMNKEYKYDLRTGDYLNQSIDTGIYNNNNVCNNVENINHISKNISNYETNKNNYFIQEPSYIENDLRHHFVEDNYSGSLINIKNNNCNKSTNIKKHNIYIPNKENVLLDNSEINNIN…	-	-	-	-	-	-	-	2	MLVVTESTLEKQRNRNYPRNSQIPSKNNSTQIKVIANRITPYCKDILKTERETIKTRKFIKDYKTKYKYIFSKNNTDNSEREKKAKLYSVEKKANLFQLKKLSKSKKKNQVSANRVNYNCIVNNSHIKNSDQEKNSYQLHLKDKKHKHLNKKSKKNLQSDIRDILLDNPNHIYGNDFPNLNTISNNNNNNNLKNKVKTNNDILYNKNVTSRKSNASYKLIDNSSFNTPCIDNNINDDDDVFKSYINDSISKKSLYSPHCKHKITTNSLIDSIVSLSNDLNTSTEQKDNEYDKNLLSYVNKILHDNNFYHGISLGVNKTELKQLESEIHKKCNDMISKFYFKTIFKNRNCTQKKKNSILKDSYNSYNSKYYDSQSSSKLVINENSNNVPKHLCHEKNRIK…	INCENP1-INCENP2
Haemoproteius columbae	SAR	Alveolata	Apicomplexa (sensu stricto)	Aconoidasida	Haemosporida	1	SSLHSFTFSLNDFDIAGFLGDGAHGSVFLACERRTNFICVLKCISKSHLVKSTQEALLRKEIELQAHLKHPHIACMYTWFHTNSHVFFVMEYCSNGDLFSYLNEKGPFSEQKVAEMLFEIIWAIRTCHDKRIAHLDLKPENVLVNHEEKCKLADFGLSAHIGSK	GISH, not RxT	1	LSEPMKEEQVALYVYQIADALSYLHHFNIIHRDLKPDNILIHYSDDMDKKIYKYGIIKLADFGFSCQLKNKRQKRSTFCGTLDYMPPEIINQIPY	-	1	KKKKKKKSEIYESNLTSNFYNSNEYSKIKNINDIKENIDNYSNNIYLSNEYLMQSNNSTKYKNNLYIDNLNFVSNEIDKIENIEINKNKIKSILNEEQQKKKYFDMNNEIVDESNFNKFKEYINFDNSNETNIKLFKKYKKNYLLYYLLQNKKHYINENKNKETDLLVKNYNNLINDKLQNSKTYIDTIIYCLDPSYMDNETNEEIKWRKKLKFLQEKLLESILCISYPINKWNNEIFEGYLNSLNFNALLDDTFIKYQENLSIDLFQKEKEFLADTQNIGKGGFGIVTKMKFLNGSKYYAIKKISKKHIGKSQSSGQAYLEAKYHSILSHVNVIKMYGCMQDENYIYHILEYCSKGNIYTLSKHFKKRIIPEILAYKYFSHVVNGLYYLNQMGIFHRD…	-	-	-	-	-	-	-	2	FSNTSENSYVRYSLYNFNNFKNNIPNYNKTNIIPIEDNKELTSFIVNKIRYSENIVTNFKNINNINNTNKNNNNNNYLSYEKSYKRMEDESDSIDAAELEKRLLKCFEDTRFKTNEDYEKYCNEGNIFYKNYNNSEYNKYGDTFMEPHNIFDNKIHTYDVAKGNFSPDSINNTICFKQDVIGQFNETKKSQLNNTYGNKEAFKTNKKNNQYNKEHGQIKDDQFIKYYEKYISKDHENDNKNLDYVTCYDFNQPLVNGLEKEENSAESDVDNKDEHDYDDDVKSDISADALLKDLNSFDNLEATEKKYEQILKEFNGKIPLLHKILKELPMKTPSNNFDICIYLLQRHGGNFSNEENMCILRDKGIVEHSAIYDMKRKCLKKNITNVSNVKLYQPKWYNK…	INCENP1-INCENP2
Hepatocystis sp.	SAR	Alveolata	Apicomplexa (sensu stricto)	Aconoidasida	Haemosporida	1	MNESTNSPLKATCRDMALKSSLHSFTFSLKDFDIAGFLGDGAHGSVFLACERRTNFICVLKCISKSHLVKSTQEALLRKEIELQAHLKHPHIACMYTWFHTNSHVFFVMEYCSNGDLFTYLNEHGPFSEKKVAEMLFEIIWAIRTCHDKRIAHLDLKPENVLVNHEEKCKLADFGLSAHIGSKHKKKGISHYRGTHDYWSPEQCARHQKKKQNFGEFDQKTDIWTLGILAFELKFGRPPFGSTNEEKESKIMNRIQEYHWSQLFFENNKHDLINNLSTEFKSFLNLCLDKNPQKRPTAEALIQHPFIFIHNKNRPCIKSYATQPRGKQGPKLSHKGFNEQDGSFLTPIWFHNK	GISH, not RxT	1	MNENIKGINYKKIEDVKKKKVKNFVYDDISKNNNSLKLNQNETKSYNDDYKNKLNNLSNINTLQNNKKLENDRRLMTNKMANLVDRKENVENILTKNERPEKSHSYNVKNVTTKSDFMNSSKHIRSGHQSVPNKYGDNNMINVQSNSNNYRNVSNDRGDNQSNNIDNLQNKTKDINNKEIDFSFEEEKKNKLRNFSNNPDCENTNFKIDSNNNNNNNSGNSNNNNSSNSSNKKTNDKHDLNVKRNNNSLDSGYKRKRDDDELLDNRKKKAVSEFAKHYNYNSIDMNTNVHANDPSNYLKRFQATESNNGNYEKKGTLEQKIYINQINNKRIINKGQDSNERLGRNIVSAPRKKGLHDNDNNNNDNNNNDNNNNDNNNDNYNDNNNQNDNINKSNKTQTL…	-	1	MENAYINDSSLQQYYLDKIKNNINQIQKSQNISLIKTVQDKNIDLNKKYNSVLVQGTYSNLNGVKNGFINKNESKPIDGNEIIEMNQKIHGSKYLIYDNNKIGSINNSSTNTRISNKLVNNTNEYDYNVYSSTGITNNSTNHLYVSPDHMVKNISTNMISEKSLLQDNNLNHMKNSFCLDTNVDNNKYYAPYKVKAVSTSVNPNIKVNNLQNMYHSYMYDTNIVNANSHSGLICNTYLERTCGKANSKEICRSVSVNPINLTNTLLKSCVDNKIYNNENNYMFNNLAENGTDIIYNINSEIDINRNNNNSHKNSNTNSYNICGNVCDTVIEEQKYHEVTPNLYISDVNKIPNNVVGSQISSTYDYVKNMYNENKEINNNYIIKHSVNIPSTSMKTLYFK…	-	-	-	-	-	-	-	2	MHVLTENTTEKTKHRNNSKISKVLFKKYREKIKVIANRVTPYCTEISRYKKEIIKARKFLKDYKINYKFLHPKKNIINSEGEKKVKRKNSLEKKKSTNSNLLERTSKSKKKRNQVIAAHRINYNIVFKKTYITNIKPHTNLLLNLKGKKKKIQNKKLKNNVLDLKTTTNTANVNNATVLENFKCSLNKRKKRKSDDLYKLNNSTISSSNFRQNKNYDLSNHNNIIKNDNEFDNKKLSINSSNKFGNNNNILSSQAFNRSSNSNDSFYNLSVNDLIKKKGSSFVNNCCEHRLTNSLVDSLVSLSNKLNEHNGKIKIIPEYNENASNNVNKTVYNNNQFNNYISFNVDNNKTKKKNNDDEQCKIGLYNNIHNNLYFQNIFNNRKKSYKNSNNCYNINNYYS…	INCENP1-INCENP2
Babesia bigemina	SAR	Alveolata	Apicomplexa (sensu stricto)	Aconoidasida	Piroplasmida	1	MPREHPAQVADGEICLETPRADCRRESTYSAPLLDLAGRSSLHSYGFTIDDFDIGGIVGDGAHGQVFLARERRTGFICVIKCISKALLVQSKQEAIFKREIELHSHLRHPNIVSIYTWFDTESMVCIVLEYCFHGDLYTHLHQHKRLPEQRVAEILFEVTWAIRTCHDKHIAHLDIKPENILLDHNFSCKLADFGLSAHVGNGKGSISHMRGTYDYWSPEQAACKHNNRGKFGDFNHKSDIWALGVLAFELFFGFPPFGSTTQEPVNCVLERVQTHEWYRILVERHGRSRINEASPAFIRFCNMCFEKDAGRRADAATVLEHQWLRSRNAERYHSNMFVNQVRSYAAEYAGSV	GISH, not RxT	-		-	-	-	-	-	-	-	-	-	-	1	MVAVCGMCDASPGISTPIRSARWESRLGLLVAGTIEDPISVRSTASRCGCKRMCSKGECELSVGSFDNGGVPTHGMPRSAAGNASRRTPTCIMDRKPFECLGCVDLCTISTDEEDVVPCSTALGAPTMGAVDVGRPTADSIEWFKHKDAAVKHFFTPPPCTPAKKPKASTGMQCSKRRNSTSACVALPNLTSGGIDAETGVRNDTQSSDANCVAPPAKKYTSASTIKGTSGVQRPKAYRHKVLLRLRKKQPRNNYDLALFLLLKFGGTESAAGRSVLRDGALMECSALSRFRNEDELAVFYRNERTALMGMLSRRVAVSALSQSQLNRKLAKLLPSTRWFNRPKLLQKIVGQEHWNPFSIFGSSLPYVNVSEVFENNSRAASDRKPGCENASACTGDPD…	INCENP1-INCENP2
Babesia bovis	SAR	Alveolata	Apicomplexa (sensu stricto)	Aconoidasida	Piroplasmida	1	MEHEQEQKDGDPDAGMDSRANRTSDYLPKGASSADISARSTLHALWYTIDDFDIGGLVGDGAHGQVFVARERRTGFICVIKCISKTLLTNSKQEAIFKREIELHGHLRHPHIASIFTWFSSESMVYIVLEYCINGDLYTYLNKHGRLSEQRAAEICFEVTWAIRTCHDKHIAHLDLKPENILLDHNYSCKLADFGLSAHVGATDSKVSHMRGTYDYWSPEQSACKYNNEGQFGEVTFGQSGSWYLSYFLVSRHLGQPLKRRLTWSCIVYKHVPGTTTGSQSTALNA	GISH, not RxT	-		-	-	-	-	-	-	-	-	-	-	1	MVIHRTFEMSPEIATPIRGYGYSSRLGLLVAGTVDDPIDIQSTVKRFAGGQIGSSPCRHITDGPYCTLGVSSCIKSASNVAYKTPDGPGSHKSVDIAICVDWGTISTDEPSHEEFTKGVSNKSSTKRGNVVSNKDYNVGSPIKVTPAKKPKVTLRMKNVSGIVSCGSMSKEVAVSSTPIQPQVSCGYVPERVDSANFDFNPPRWKTLRHKVLLKLRRKQAHNNYDLAMFLLLKFGGPDTNAGRSVIRDKALIMCSSLSRFSNDVELRAFYLRERAALISILSQRVALNTYTPAQLHRKLAKMLPPNRWFNRAKLFKKVKDQEQWNPFSIFGSSLPYVSISDVFNTRNSKGDCCQSTVEATPSINWSSDPLMLDEVLWYLEATGKYIDKSRQVCTLQRCY…	INCENP1-INCENP2
Babesia microti	SAR	Alveolata	Apicomplexa (sensu stricto)	Aconoidasida	Piroplasmida	1	MGMTMDVKGLYTPKARFSARETRDKFDFAIQSKFHSLDFTLDDFDIGAFVGDGAHGQVFLARERRTGFICVLKCIFKSQLVKNGQEAIFKREIELHGHLRHPNIACLYTWFTSPTMIFIVMEYCYNGDLFNYMSKHGQLSEERVSEILFEVIWAIRSCHDKRIAHLDIKPENILLDHENRCKLADFGFSAHIGHLYRSNGVPHHRGTHDYWSPEQCAKHLGLGLKYGEYDEQSDIWALGILAVELFIGYPPFGSTTEEPNNVIMNRIHTYHWTKHIFEMKREKHLLSSTPEFRSFVEACLRKHSFKRPKADELLMHPWIVKHNINRFKDEAFISQPRSGYNYRKS	GISH, not RxT	-		-	-	-	-	-	-	-	-	-	-	1	MKKMDNSDTKLNKNATHTHDPCTNTQFIGLPLEYNDISPKSFCSNDFEVDFDNNIFRTSASRDESVFIRNSSITSNSESATHPGHTDNILGHSYFSEKKLNYGQILQQNDQKCASISLEDAMGSMIDIGKGTIFCSNTSLDSTINYSSTLGDSTNILGESFLELHTVTANYSNPSNDNTNWINHNINTLYDYQQRENEGDCGTPQGKNENMRQSLLFLSSWEVEDENIKFKRETPRSSSNLLPYSGNSVKESRITEPTPERSEFTLAQSNLWPIATSNEYKTTVTGEGRDCDMCKSPDAKAMDPNNPATNYKLQIFHKALKPLGAKSESDNLDIGLYFILKQGGIDSNSAKYILLDPQIKMTIHYQKVTSDTDSSNEDLSQANQNFKKWYDLQLSHLYQ…	INCENP1-INCENP2
Theileria annulata	SAR	Alveolata	Apicomplexa (sensu stricto)	Aconoidasida	Piroplasmida	1	MLNGYDCSCTRQTASATDIASKSSSHSLWFTLDDFDIGGVLGDGAHGRIFLARERRTGFICVLKCISKAQLVGTGQESMFKREIELHSHLRHPNISCLYTWFTTKTMIFMVIEYCHNGDLYSYLMRKKRIPEKEVCEIMFQVIWALRTCHDKHIVHLDIKPENILLDQNNVVKLADFGLSAHINFSKNNSTTKPVNGVNNINGNSNTGNGNTNNINGKVNVDDENLNFLRGTYDYWSPEQCTYKYNSEKKFGEFGPKTDIWTIGVLAFELFFGLSPFGSTTEERLDVVLERIQTLEWFEFWQKKYKNLYLNEMSNEFRDFLDKCFIKQSHLRPDASQLLQHPWIKMYNIHRFTDSVFLNQPRT	GISH, not RxT	-		-	-	-	-	-	-	-	-	-	-	1	MISVFNLEEICLETPKRFKGQKEDSILIVTGTIDDPIYISTDNSNTNTPTNSPLNGINLPLNGIAPTLNGTNLPLNGIAQPLNGTNLPLNGTNLPLNGTNLPLNGTNLPLNGIAQPLNGTNLPLNGTADTPTHVTISPTGPNLTNTPKNSTYNTIPTTPKPHTPTHTTKPTPTTKPHTTVTPKPTHTPNPIVTPIKKNIYKQEYKHKFLLKLRKKQYENNFDLGLYFLVRFGGPRSSMGTSILMDDELLECSELSKFRNNRDLNEWFDFQYKSLYKNLRKRMDFNNLSVSQVNKRLSRELPRKRWFTREKLYNKTIEQENWNPFSIFGSIPYVSLNDVFNLESSKNYIIGTLKDFLITSSVTVLGHTATNSTEVTGTSANLTKGISTSTNNLTTSTTNT…	INCENP1-INCENP2
Theileria equi	SAR	Alveolata	Apicomplexa (sensu stricto)	Aconoidasida	Piroplasmida	1	MLKNNHVDTELDTIHDKSGRNSSIHPQCSCTRLTASTHDISSKSAIHSLWFTIDDFDIGGLVGDGAHGQVFLARERRTGFICVLKCIPKVQLVGSGRESMFKHEIEMHSHLRHPNISCLYTWFTTSTMIYMVMEYCYNGDLYTHLMINKRFDEKRVSEMLFEITWAVRTCHDKHIAHLDIKPENILLDHNFSCKLADFGLSAHIEGFNINHMRGTYDYWSPEQCAYKYKTNKFGEFNQKSDVWTLGVLAFELYFGVSPFGTTCEESVETVLSRIQNYTWCKYWVSKYGSLYISDISSEFKDFLDLCFTKDSGKRPTASTLLYHPWLKLHNKGRYVDDVFINQHRI	GISH, not RxT	-		-	-	-	-	-	-	-	-	-	-	1	MATIVRIGPSFTPKRSQNASHSSGLIVTGAIDDPFCISSELTPSIGSRNGQGSSCREPMSTPETRKKDLVQGVFSRHASKSTSVEAIQPLKGFLSPVDKSEEASEKGSRSTLYSDSCAPVVTLEDGRQDDESTQTVLESSASSETPATNAQFYTCKQMIEISPKRIEDNYDLPLFFLIRFGGPASSVGASVLRDGDLLKTSILSKLSYEEMYRYYACMYKRLHDNVMAKNCGKNLDKTKLHRKMSREIPTKTWQNRENLYSQIVTQSTWNPFSIFGSSPPYASLQDIFNIKSIQDYVTPDVFGRMCRVLGHTRHTLLEYLERHWKKESYTANWKEDPLLHEEVVWYLKATGKTVDKSESVYTLQKCYCVTPNPNIRYNWNDPRNAHINQERRRISTWQP…	INCENP1-INCENP2
Theileria orientalis	SAR	Alveolata	Apicomplexa (sensu stricto)	Aconoidasida	Piroplasmida	1	MNNSYECSCTRLTASDTDIASKSSIHSLWFTLDDFDIGGLLGDGAHGQVFLARERRTGFICVLKCVSKAQLVGSGQESMFKREIELHSHLRHPNISCLYTWFTTKTMIFMVIEYCHNGDLFSYLMKKKRLEEPEVCQILFQVIWALRTCHDKHIAHLDIKPENILLDQNNVVKLADFGLSAHINRAFDNNMKDSDFLRGTYDYWSPEQFGEVGHKTDIWTVGVLAFELYFGFAPFGTTLNDGLDTVLRRIQIQPWYHMLENRYENVHAGSMSSEFRDFLDKCFTKVSTERPSSAELLHHPCIKMYNMHRFNDPRFIKQPRKQS	GISH, not RxT	-		-	-	-	-	-	-	-	-	-	-	1	MLTVFEKDKPSLLCNIVSSLLSNGSDLLVTGTVNDPIYIQLVSADHTSNTDTDDTHRDKDYTNNTNETFNGGHMNGVTPKVNNGIESIHRIKNQGDDYYRHKFLLRLRKKQFYNNFDLGFYLLVKFGGPNTTMGISILNDDELLECSQISKFETYRDVEKWYLQQYNYLLSQYLKARSRKGLQTSQVNAYEKLAKLIPCKNWFDREKLHKKLVEQRHWNPFSIFGSSIPYVSINQVFNIESSDRYVVGMIKDGVLRRIENNMGISSTNGGTRYDEYEIGNEPKYYNPFYEEYSPNTIMMKYLRRKWIKESKKTTNWNYDPLLNVEALWYINSTGRYLDMSKEVCVLQKCYCTTPDPSVRFNWNDPRNRRDSPRGSMGFMLDYNDYKRARSRYIELDDMR…	INCENP1-INCENP2
Theileria parva	SAR	Alveolata	Apicomplexa (sensu stricto)	Aconoidasida	Piroplasmida	1	MLNGYDCSCTRLTASATDIASKSSSHSLWFTLDDFDIGGVLGDGAHGRVFLARERRTGFICVLKCISKAQLVGTGQESMFKREIELHSHLRHPNISCLYTWFTTKTMIFMVIEYCHNGDLFSYLMRKKRIPEKEVCEIMFQVIWALRTCHDKHIAHLDIKPENILLDQNNVVKLADFGLSAHINFSNPSNGLNNSNGDDSSNGINSHGLNTTNGINNTHDPVVGMNEGSEKLNGNLNFLRGTYDYWSPEQCTYKYNSSKRFGEFGPKTDIWTIGVLAFELFFGLSPFGSTTEERLDTVLDRIQTLEWYEFWQKKYKNLYLNEMSREFRDFLDKCFIKQSHLRPDASQLLQHPWIKLYNSHRFTDSTFLNQPRP	GISH, not RxT	-		-	-	-	-	-	-	-	-	-	-	1	MISVFNLEETCLETPKRLKGEKEDSHLIVTGTIDDPIYVSSDNSKTTTPTQTPTHSPTHAPIQLINSPTNNLEISKLTPINTPKTNKRVESYYKHKFLLKLRKKQYDNNFDLGLYFLVRFGGPKSSMGASILMDDELLECSELSKFRDKRDLNEWFDFQYKSLYKNLRKRLDFSNLPLSQVNKRLSRELPRKRWFTREKLYNKAIEQENWNPFSIFGSSLPYVSLNDVFNLESSKNYVIGSLKHFLINNTINTNNGTNTNGNNTDNEDERLFNYLSEKWRNESRKVTDWNRDPLLTSEVLWYINATNKYLDKSQNVCILQKCFCVTPDPNIRFNWNDPRCSVWRNYDGPRPSMGEILASSNYKNSLERFNTIKARAEQSNHISQEDDIKLKHYYNYFNL…	INCENP1-INCENP2
Cytauxzoon felis	SAR	Alveolata	Apicomplexa (sensu stricto)	Aconoidasida	Piroplasmida	1	MNFRFNTNGMNGYVLAKRHDNLNNGDINDTQYSCSRLTAAACDISTKGSVHSLKFSLDDFDIGGLVGDGAHGQVFLARERRTGFICVLKCISKVQLVGSGQESMFKCEIELHSHLRHPNIACLYTWFATKTMIFMVMEYCHNGDLFGYLTRNERLTEVRVCEILFEVTWAVRTCHDKHIAHLDIKPENILLDHNNSCKLADFGLSEHIELDNNKNINHMRGTYDYWSPEQCAQKYNNNKFGLFNHKSDVWSLGVLAFELYFGIAPFGTTTDENLDKILYRIQNYNWDQYWINKFGKLYISDLSFEFKDFLDKCFIKDPNNRPSASIMLEHPWLKLHNQHRFNDPSFINQIRPIINECEEGAWCKDVRSSNVSMDQEYTIHANTTNAIYNNGVKKPYIPH	GISH, not RxT	-		-	-	-	-	-	-	-	-	-	-	1	MLSNHHYMNYSTNLIITGTIDDPFYISSEETTPKRKIVRYYKHKYLLKLRKKRFENNYDLGLYFLIKFGGPSSTIGSSLLKDDELLECSMVSKFNTVGELNEWYRIRHYDLQQNTKDKLTIKNLNVSQINRKLAKQLPCKKWFNRDKLYEKVVEQSTWNPFSIFGSSLPYVSINDIFNRQMSQYYICGNLKRKISKEIGCEDNDNEKILNYLTNRWRNVSKNNINWLKDPLTVDEVLWYLNATNKYIDKSSNVFILQKCYCVTPNPTIRFNWNDHRYSLWKNYHGPRPSMGEGLSPTNYNTSIERFVRLNLDHKKRLKNGHSYEDVKLKYYINYFNNNKVLEDNYHNVNLSCQRRFISN;	INCENP1-INCENP2
Nephromyces	SAR	Alveolata	Apicomplexa (sensu stricto)	Aconoidasida	Nephromycida	1	MDEDTFEAFSPVAATSLEYRPMAPPSPLKKIQNKQIQSSVLPFQSPQANGGSCKTQTIGDEEPPSSPSMLPSTPLLASSLDVAMKNSMHAYKWSLRDFDIGGYLGDGAHGTVFVARERRTGFVCVLKCIAKAHLIRGNQEALLKKEVELQAHLKHPHIACVYTWFDTPSSVFLVMEYCYHGDLFHYLENHGPFNEHEISRMLFEVTWAIRTCHDKRIAHLDLKPENVLVNHKGQCKLADFGLSAHIGSKQKTKGLHINRGTHDYWSPEQCACSMGSSTLFGEFNQKTDIWTLGILSYELMFNRPPFGSTVGKEFKDESTAKSTVMSRIQSLHWSAVGAMQRYLDKSKLSEVFKDFLDTCLQKNPEDRPTAEEVLMHPFIVKYNQDRLKHAAFQSQPRGG…	GISH, not RxT	2	ISSRGGGGVEKNLRSVDWKQRNLSKIRAASESPLKRMTSGGSAANPFPLNHAAQTSSGFFPIEATTEDGKHTAERLELPYSAQNSEHPPKLPMLPGIDPKAYTRTRRRHRQQSVEPPSEHSSKSSHSHTKLAPSAGSNSFLQASEKLSDSALGKASSSAGRVSSSRGSYFMWLAKNGRSVDESFSRLSKPSNSKSSHTKQGEEGDLRGGSSPQSDGKSGSSLELWKPLEEGDIEWSLSDFAYYQNPIGKGRTGYVFKAIEKSTAKEYAIKVMYKSTLREFGLQLQIKEEIDIQKHSRHPGILRLYGQFEDPARLYLVLELALDGSLRQRLEEKHGRLPEAEVAHYTYQLAEALAYLHSMGVIHRDLKPENILLSRESGALDSKKGVFKYGVLKIADFGF…	-	2	NKAEVKDSGMLGQLAFEIKVQQSLCHANILRCYTFFEDVNCIHIVLEYCENGDLYTKMKQNENRRFTETDAFYYFSQLVNGLYHMHRNGFIHRDIKLENLLIDNKNTLKIADFGWCGNVLGKNNNFSFCGTLDYLSPEMIQGIGHDWRVDIWDAGIVLYELLVGRPPFQSTQHFKLIYRILNIQISFPKSVKKDAVALIEKFLKFDPDQRIKLNDLRKNPWISRLWKETLEINKTDPDEFMMTTDTDSNTYLDQSSSDDISDRESLPMTEHYMSDPEISCSSDFSDLVTKTVTKKKKKPATEPEKELCREVYIPSSMKKPSTPKSKKSTDSCVNESLETSSSASSKNPPSSRAISVTSKHCQLLDDIIDSLDNINSYRTKALSFKKSPSPGHSNVRTDT…	-	-	-	-	-	-	-	9	MSPASHRSPPSHRFPSSSPYFFSDLSQPKEHFHHKVLRHIDAKNPVENFNVCEFFLSNRESDFKASEAQLLLKDPEISLVSDICRSQEESVSQLFPPSRLDSISCSDTPLKTHIKLYPAWYSKLQVAETLIRSLKVQDTWNPFTIFGSAPKNVVLSDVFNHDTYALWACKEARAANRTINALFKKGYINDPVRGVTRNDWRRIKRCLHKKWHDESRLELDWRMDPLLVHEPIWYVEYSGFYVDKSDEVVEIEVCYCPTPNPKLSFGWTDPRSRRK;MKWLLSTTPPKPTHHPSQPSMCTAITHTKKQNEGNKKRVLATSRPEVSKRTKRTSTEYIDEDALLNDGGTPTHPHRVLSMLSHCSVQKEMRMQEKYTPTKHISKDGLHTRSEFKVIHTPSARA…	INCENP1-INCENP2
Cardiosporidium	SAR	Alveolata	Apicomplexa (sensu stricto)	Aconoidasida	Nephromycida	1	MAFLPMDSFGARSPSPPLFFEASKSAVPQEFRPMAPPSPLSKTAKRSNKLIFKSPHPQSQLNESIHSKELEMDLELSSSMPYLAETPQLASSKDVAIKNSMHAYQWTLKDFDIGGYLGDGAHGTVFLARERRTGYICVLKCITKAHLIRSNQEALLKKEVELQAHLKHPHIACVYTWFDTPSCVFLVMEYCYNGDLFHYLEKHGPFDENTVSRMLFEITWAIRTCHDKRIAHLDVKPENVLLNHKGECKLADFGLSAHIGSKQKRKGLHIHRGTLDYWSPEQCAHAMGSATLFGEFNQKTDIWTLGILSFELMFSHPPFGSTEGNEFNDEHTAKRTVMTRIQTCHWSRVGIEKRFLNLSKVSSVYKDFLDMCLDKNPDNRPTAEEVLMHEFIVKYNQDR…	GISH, not RxT	1	PRPERSSSSSAVSSNIFSQRVHSKRSLRNGETARTTGMPLNPTASSYKHLISSSEPSLYSDEVEVERLPSSSLSMAKQKAIHSPHPKAAKNYLLSSHGQARHPATLFSPHSLSPSKQLCLHKVEEKVDFSSPSPSIMEIPPRRSQPPHFSEKQKKEADEPSRPSVQRLSYLEWLAQNESKHLSSRSSPTSSTLWISPQRETTWKASTFTPQKYPIGKGRTGCVYQAIENATQRVVALKIMSKETLLSMGIQKQIKNEISIHSSLDHLNIIKLLGHFEDPKTLFLVLEFANLDSLRHLLRQMKGPLQEKQTAHYIYQIATALEYLHAHAIIHRDIKPENILVHFLSQDALKAASLNSSLYYFGVIKLADMGFACRLEKSRPKRRTVCGTMDYIPPEIASR…	-	1	LKCYACFEDDDFFHIVLEYCANGDLYSRMRRNSFRRFNEKTAFTYFAQIVNGLYYLHSQGFMHRDLKLENLLIGDGDVLKIADFGWCGNIVGYRSNYAFCGTMDYLSPEMIEGSGHDWRVDLWDAGIMLYELLTGKPPFQSTQHNELLQRIINTEITFPSFMKSDAVDLIKLFLKPKPCERILLNELRKQPWIQRMLKTTQFGNTKSSKVSVSGGLQLARFTHAEEKLPIMTEPPINLKDESDARVCHYQLQADMQSFHLNTPKEGIKILENGKYATKQTTDQPEPIESHARLSSECKDNSLSSETSVTDRKAQQRNASTDSANEVTSRIACNICDQNNHVFNPGELSEETPKMDANVDKNLFTLGPTALQMALQLPVCAIENAHAVLQDSSETQHNTN…	-	-	-	-	-	-	-	2	MSQGEHRYAMPHYKHGNVNMVTTKLSSASPRSRTTPQKRVPEGASSQGREDFPQREHLQKFAKTFSIELENNLPLLLESMNRITTRGAYPVNTKSLCQAEPFFGGDLRGCYSPLSTQNMSRCFPQLSPVKNSPHFRMRYNMDGTALMRQKRPLDEENIEQNVPNYPRKKLITKISTHPAEKSETNEDFLTKCFNVARPVLPSRSDAKQKIATSNSNTVNTIGIEETSGVSFIDQTEDYADLPSPGTNWTSADPFNPKHPVSPHCDYLYDRVKQHPKDTNYFHRILRPILPRIPKENFDIGSLLVLRKGGPLNPNTRPLLQDRDLTFIPRDWSTVISVKSRFNEIKEYFRWMEAYANTIRKGAWYSEMLTSDSVVTTLQEQESWNPFSVFGSAPKAVNLN…	INCENP1-INCENP2
Toxoplasma gondii ME49	SAR	Alveolata	Apicomplexa (sensu stricto)	Coccidia	Sarcocystidae	1	MLASKCGGTGGGQEVVSSSFLMSKPSFSTLPAASSPANVERKGQAEPSSTWLGAESTKTEVGKTGGAGFVWGLSGGGETAEFPGGCRLQAADGSNRAESQHFLPSQGGGQGPCRKADLGARGQVKRGDQAARARADGDGCRVSPKGENVDANCGNSGRNPSSLLVSKGGPEVGCGLSAPHKMDKVSGSSCASAVNSDLSLVCPLHAYRFCLRDFDFGGFLGDGAHGCVFVARERRSGFVCVLKCITKAHLVRGGNEALLKKEVELQAHLKHPHICCMYTWFQTSSAIFLVMEYCLKGDLFALLDKTTFGFDERTVAKQLFQITWAIRTCHDKRIAHLDIKPENVLVDHMDKLKLADFGLSAHIGGEHRKRGVSINRGTCDYFSPEQCTFRLRNAALRAG…	GISH, not RxT	1	MPLPTTRAVPTSPRPTAAPFFKSPHSVSSLPSLDSSCDSQAFSAADQDRSSGLAASASPAPLPSFLSDECASETRSSHPLLPVPAVTSLPSQKHAAPFLGEAASGLASRVFSGLLAASSSIVNTQTLSHHAPSPPASSSFCSPSNSSSASSFSSSERGEKKPPASVFSRAAAWLPQSVGGRSRSDRGQAGDRLSVDLEAGRAEDAKPGHESGARTARWRRQEEQTEEWREEGQPGKTGGADPRRANEEDRAQTAGAADVSSPGSRVPELAFPQQSQHKGERRRETDRSICGPVDPSRRTHASPIGCLFSRRRPPSADDEIFQSPRDPCDSSSSLCTLMSSSSSSFSSLSSSYASASFSSSRTGFSPVEATKKMKRKPPLSPLENDLLVTSDGNRRSARQ…	-	1	MNFLSYKVSSSKQGLPAPACSGYIGDSPPDVTASCAESPFLYRRPSSPAQRHFQPLSSLSPLSKPVSANHVIDNVESPSTDSASESWSHGLPASASPAPLEQYVANPEGCAALDPGHTKIRPTTPARNSNYNGGNNDSVAVVESVAFPHFVTRRMTPTTLYSSQRSEDVVAPQHISLRYPSSPLRQSHSIQTRVPENGSNKPENHDTVCHSLPRHDGGAPSPGSQLAQSGGLSHKNWLQGLWSFPGGAWAAQAGASAFGVHTPQTSGSVLRQQRLGGTRVRQTNQLGASSYASVDCNGNRYPATLMQAHPETVSAESHVAQLQTQSPSAFGVTGVGTQASPMVTATQLRSVTPMLTKPELRRGPMNQQGSNLHQPVVPTQQPQVLNHRGEILASSDRPC…	-	-	-	-	-	-	-	2	MPSSRGKTPPTCGGHDSSERKKAGVNAEASEPSSVSEMSVTAFTALKAHLQCADEQKLNDLFAFVSRRSSLASALSCATPRGTAADTFRESVTTPCGMDFATASSWVSQSARKAARSGAVNGAREPVSPLPSAHKTGLHPSTSVVFASQKVACASKTLLSSHLDSGARVPFLSEAQDNFSTTTTSCPEPSRPARVSTSSSWSSTSPFAAASFFVTQEGLGSTSFCHFDGPLSPDCSPNGSLSSDVPAVFEPKASPASAKKSFKLCRQLASPGSARTSEESQRACETGGAAESSVPRGRQKKASWRDQNGDDKRASPVKLRASPRFSPGAVKLSARKTTNGSTPLSVRTPTRSSPRLQLRAPSPTRAGDSRLRSEGGDSSRQRSIRKGKGQQITSKLASP…	INCENP1-INCENP2
Hammondia hammondi	SAR	Alveolata	Apicomplexa (sensu stricto)	Coccidia	Sarcocystidae	1	MLASKYGGTGGGQEVVSSSFLMSKASSSTLPGASSPANVERKGQAEPSSTWLGAESTKTDVEKAGGAGFIWGLSRGGETPEFPGGCRLQAADGGDHAESHHFLPSQGGGQGPCGKVDLAARGQVKRGDQVARARADGDGCRVSPKGENVDANCSRPGNSGSNTPSLLVISKGGPEVGCGFSAPYKMDKASGSSCASAVNSDLSLVCPLHAYRFCLRDFDFGGFLGDGAHGCVFVARERRSGFVCVLKCITKAHLVRGGNEALLKKEVELQAHLKHPHICCMYTWFQTSSAIFLVMEYCLKGDLFALLDKTTFGFDERTVAKQLFQITWAIRTCHDKRIAHLDIKPENVLVDHMDKLKLADFGLSAHIGGEHRKRGVSINRGTCDYFSPEQCTFRLRNAA…	GISH, not RxT	1	MPPPTTRAAPTSTRPTAAPFLKPPRSFSSIPSSDSSFGSRAFSAADLDRPSGLVASACPVPLPSFLSDESGSETRSSHPLLPVPAVTSLPSQKHAAPFLGEAASGLASRVFSGLLAASSSLVNTSLSHHAPTPSPPASASSFPSPSNSSSASCTSSSERGEKKPSASVFSRAAAWLPQSVGGRSRSDRGEADSRLSVDLEAGRAEDAQPGQESGATTATWRREEERKEEWREEGQPGKTGGADPRRAREDDRAQTAGKADVSSPGTRVSELSFPQQSQHKGERRRERERSTCGPVDPSTRTHASPIGCLFSRRRRPSADDESFQSPRDACDSSSSLCTLLSSSSSSFSSLSSGYASASVSSSRGGFFPCEATKKTKRKSPLSPLENELLVASDETRRSA…	-	1	MNFLSYNVSSSKQGLPASACSGYIGDSPPDVTASCAHSPFLYRRPSSPAQRHFQSLSSLSPLSKSISAYHVIRNVEAPSTGSAGESWSHGLPASASPAPLERSIANPEGRAALEPGHTKIRPTTPTQNRIYNESVAFPHFDTRRMTPTTLYCSQRSEDVVAPQHLSLRCPLSPLRHSHLVQTRVPENGSNKPENHGTACHSVPRDDGGAPSPGSQPAQSAGLSHKNWLQGLWSLPRGAWAAQTAASAFGVHNPQTYEPVLRQQRLGGTRVRQTNQLGGSSYAAVDCNGNRYPAPLMQAHPETASAESHGAQLQTQSPSAFGVTGVGTQASPMVTATQRRSVTPMLTKPELRRGPMNQQRSNLHEPVLPTQQSQVWSHRGEILASSDRPCLSTPWHRPTE…	-	-	-	-	-	-	-	2	MSNSLGSFLLGGLVQPLLGTLQNWTSKKRKQREDDEQVGLHTAASGVACSQSGRPLNSVPAGCVLRQGGRIIPADSLPGRREGCSGGHAKNGSGWSVFPSQKSLAPAAKRRRGSAGRGQGNAPCGNRRDAERNEAGDAGVLTENDSSQSVHQWPATEQPGGQLQRSKRGKALRRKARNSAKKAPEREGAPDSELQRPVESETLREMRSHIPGTDSASENLEARAMRHEALSSHASASIFPSAEIRELQRKTAASFPASGHLSTSLAFPRPLGFAAGSSASATELEARPGQARGNDPYSNLRKQERSGTVEGKVVTRNASSLSPHLSSVNEQTLQNRGGYLSSAPPNLLSSPSAPSLPNSSCSVPCSTGDDERGLAQTQFSSLPSSLDPQTGEVGSRGSD…	INCENP1-INCENP2
Neospora caninum	SAR	Alveolata	Apicomplexa (sensu stricto)	Coccidia	Sarcocystidae	1	MLVSKYATAGGQAEVSSGAFRMAKASGPTLTRGAKGGECRDPARYDSSLKAASSFMASPSKLERTTGWPEPPAAWLPSAETTKAEEGKDAAGAFNWGFSRHEGRETPRDFAAGGCRLQAANRNEHGASQHLPSQGDSQGLGAPDLSGGTKVKRGDEAERTRVNGDGCRVSPKGENVDVNYTSHASSKSGVNASFVGLKGVGGDAASGLLAPQKMDKPSGNNSCASAVYADLSLVCPLHAYRFCLRDFDFGGFLGDGAHGCVFVARERRSGFVCVLKCITKAHLVRGGNEALLKKEVELQAHLKHPHICCMYTWFQTSSAIFLVMEYCLKGDLFALLDKTTFGFDERTVAKWRNGVRGSATIGGGIPCGRVFSPHPGLRTKHAQVFFVFQENVLVDHTDK…	GISH, not RxT	1	MLPPPSRAAPASRRQSAAPPSNPPPSSSSAVPSLDSRNTSSAVACDCPSSLVASSLASLPSFLSDENAGTKTHSSPSLLPVPVVTSFPSQKHSEPFLQDAASGLASRVFSGLLAASSALLNTTLSHSPADPPRGAHAASAASSYASPSCFSATEKEKSTSSVLVCAAAWLPHGGGTGEQGQGAAETDVFDLEAGRREEIARDRKQGDRSERWRGDADDRKTVREEGQQGRRGGEDPRRPREVQSWPGSNKALACGTPRHTFAPFERSQNPGETRNERDKSAGGSADRSMGTDAVSACLRSRARLPLPDEERFHSPRDACASSSSLLCTLSSSSTSFSSVHASASSSSRAGSTDSTQQRKRRYPPSPLENAVPPVSDEGRARDGRGERPVEEGARRRRDD…	-	1	MSETANHALEVTATPACASKRLSMRNSPAQVPLSSSQPGELEATGFPQNPKITRPSTQGLILTDATQVTPTLPMHTRSAAAAVESRSTGTGSGHPGVRCEPATERGEARYVSTASWQVAMPNTSSKKRIESPMPSQRGSDNQTGGASATCAASPQTSETRQLTCETQTSRLKEGPSSTAQGGIDASPSVKGYPAFGGPTPVQPLGPAKQKQLVQRSDAEEADDPAANGSTEVTPARHHMQQCSAPTRRNASGETNAAGVKVRASGTLRGRPKQNGHFCEGDAVRLSANASFSPKARGEGLPSVSSIEEQGDVIPLRSFLWALDAFPGVGGLSKTGKHQEKTPEDALVNCQLDDFELADSRSGGDACLLGRGTYGVVRKLRHRATGKVFAVKSIEKESVV…	-	-	-	-	-	-	-	2	MSNSLGSFLLGGLMQPLLGTLQNWTSKKRKQREDEQTVLDAAVSGVAGGQSGRSLGSLPAGCVLRQGGRIIPADNLPARRDLGAGSRAKDGSGSGVLTEPKSLGPAPKRRRGSAGRGQGNAAGGGRRGGERNETVDRGLLDNGSLQSDQNQPHPWHAAAHNGELQRSKRGKVLKRKARNSARKAAGRGDVCQDTALQGHLDQDPEAALETPPQVSRSDAASENREATATGHDALSVHAVVSSTPAIENGDLQRKTAASFPESGHLSTSVAFPRQLGLPAGSPEMPAQPEMASGQARGNDAHSGLRMQEGLVRVDGGVISRNATSFSSHLSSVSEQVVQKRGAYLSSTSPSFLSSSSPLSLPSASCSAPRPTGDEERDERGLQRLQFSSLPSSLDPCAGE…	INCENP1-INCENP2
Sarcocystis neurona	SAR	Alveolata	Apicomplexa (sensu stricto)	Coccidia	Sarcocystidae	1	MAAAAASATFAGRAGERSVCRRGGEREQQQHLLQSSECHFAAAIAAATFSSSSCSAPSSGPSSGAAATLSGSAVAAAADPGEGGATSPPLPALQAAAAAAPPPSVLRLLAAAASSSSAESSAAAVPAGALPLSFPAAAAAGGAALLPSPLAAARAAPPAAAKEEEAATATAKGEAAAATADEGRAGRRAGSGNSAGFPATLSPGAAPAAAGVAGETAAAGSRAAAAGSRAAAEVSRAAAEVSRAVAAAGSRTAAAAMYGSAGVERGEERAAKKLAVAAVHKEKETPVARAAAAAPAENRSSPSPAPSSAAGGNPTAAASAFAAAASSSTKFEAAKVSAAPSRTPTTEEEEEENVEEEMKKRREKKDTRPFSPQAPPPPPPNPAAAASASSCASRAAGEA…	GISH, not RxT	1	MQLAVRCSASLKTPAERTHEQQPQQQQPAPAFSPRTPRLHRFPKLQQQQHQQLEQEVQQQQQELQQQGHVQELRHQPEPLQHQLYHQQEERLEEQHAQPRRIRKQEGQQQLRPQKPHYPQQQLSCWDGSRGSGSRATFESSSNYFQSVSASSSSVGRSSSDGTSSRSNNSGCTVKSNINFYSPPPRVSNSTSSSPPAFEETAAAARVRRGDEGLQQLLLEGAPAGRDASATATVRAAGGSRAAAAAAGRRLLPNAEDFVIEPKPLGTGRTGSVYKACCIAGPLYHVLTHSSCPPESATAAATARAGASAAGRAASGEEGAAGAEQDAERPTAAGVSVAVKILSKKKIEELGLRDQTREERAIHLQLRHPHIVRLLSSFEGQQHVYFVLEYVNGGTLRER…	-	1	MNCFLSFQRGAAVPISSPPEVSKAASEPALRQYITSRSAGYTTFVKHGQAGAAFVSVKRHISPALLKRATPQMEHSTILRPRFIYPAAVDARGFCQQDLPRHQPSMWPSYEQHQTLQNPQAKQHQQQRKFCVREPSQKELAKKYGAEDHTIYRDVNANDYKNIERQQRGSSLIANGARSQDAQQLLSPAPYGKFPRPTEQQQQLKGDLMRSNASEEKTSYACQPKQQDSVGADTCFSAQGATTAAGGPSTISPRNSAPQDRTLPSSTEQLGSPSFCRPQLPRAATASYGTRARPLQPRSFSVTTTGSGTGAGVTLRDKGTVLHFSVPETSGDHHYSRPRPATSSPSNGNLKTPTLSMPEAVATASVATAVGVEQAIPAAGSTTTTSTPFVRITATSNRF…	-	-	-	-	-	-	-	1	MELLRKDVHILYYARGLHHAAHVETYLRQQQNQQEKQQQGAAAAPGNDTTTTTFGTTSLSVSSAHPVPQCASDNAPPAASTIDAPSTDKRSPAAPCFPSVSAALAGGARPQAVPDWATPQALRDALERQQCYDPFSIFGEAPPELLLSEVYDEQHYTHISPQTRASHPVLARLKHQRSAALMAVFQQKRAALARTQQLLEHEIRQLQRKQRTTFSEQQVLLERGSFSSVLGRAVFSCSSGTAAVKGAAAMKTDMCGKDGGGSSSLQLKKVESEENSESKSNKDKEAMLRLQQRDMLVQQQLLERRLEEQLQQEERIHGELLRNGFRFLGGRVNGGESGAALFRKWVLPALESWWQQQCQVELDWRNDPLTSEECSWYREVMNAAVDASDRISVQQACFC…	INCENP1
Besnoitia besnoiti	SAR	Alveolata	Apicomplexa (sensu stricto)	Coccidia	Sarcocystidae	1	MLAVPAKYGGEGGASGGAPADLGSALFLSAAAGGTTTLLSRGSQGADGSCVKTPGTRGAPCEKFESSRVLRPEALSSSRFAAVGASDCPRTDDGRDPTAATEGSEGCRVQAPDAQGRQDAGATLKTRGAAAGAAGGKPSRGATSALLAAELKGASGAVGGTSYGFAGSSQKTDRLQMSNPCASAVHADLSLVCPLHAYRFCLRDFDFGGFLGDGAHGCVFVARERRSGFVCVLKCITKAHLVRGGNEALLKKEVELQAHLKHPHICCMYTWFQTSSAIFLVMEYCLKGDLFAILDKTTFGFDEQTVAKQLFQITWAIRTCHDKRIAHLDIKPENVLVDHKDQLKLADFGLSAHIGGEHRKRGVSINRGTCDYFSPEQCTFRLRNGDNVCSFDEKSDIWT…	GISH, not RxT	1	MRASLFQSLSRASASPPSAYAHASLPFARREEAEAAEARLRPHDATQNRARRAPPGAKPLPTEDDEHFHSPRDFPTSPRLPLLLTASSVADNTPLSVAAARPLPASCSLLRHFLPTQARRGGRPPSSVDGEGGGLCGARDAAASEKEYARQAGGGLDSAADSVATGVSRFGRNETLNPSQGRQHGGSESDARRSRYGENGAQVKTLQTRTQFRSASRRLPSSKRAPPLLSELDREGRREKVATGTAPDVCRDDAHPARAESVSYPSQASEAGRAKTRMKAEELPPLSGRREREAAPADGREARSEPDERRRPEARSQSPAAPKTDARRVAASFLPRVALLGAAKSLQMRERREIERAEKGDAPVLLENFESLATHASLARRRLAGSPIPDTQRALNRRG…	-	1	MHLIYHNVSSSRSGSPADGAFTRPVVAEKIAPALHPQGPPPPGSQAPLLRAPFISYFKTASSNQDIGQRSGPSTCLPGAPVNHGMFEVPSAATPSGCGSSPERFVFCARGRGEDQTGAVTQHLKHENGSFAPPRGALSPSHYPGYHRSASPMGVPGSQWNGDRGLSQRPFLSHPSTPLTRTASPDVLRSQIKRNPGHPDDGLLSQSFPPQVNLSPANHSFSLQQSAFPTLNAGAGIWPLTSAASAARAAAAACNMQGYRACMPMVRQQRLGGADVTQFNALESCAYLSANYSRPASPSVPVTGRTEGSYASAENMRVLSRCVSNLARSGAQTAAAGAKPQQSVLAPGTIPFGSFNDQLHQQQGYSRTPSPVVQQPAQQHAPALQPSGRAGFPAADVFRG…	-	-	-	-	-	-	-	2	MPGSRGKPPSPSRGGRAAGATKEREVTGAARQSLRDPSSLCEIYVTAFSALKDHLQSVGDQELNDLFSFVARQSSSSQLPSASCFPSGAGTPPAPTAASRGGDQTSCFPRDPSCEIRKPGDGAVDGASRRKPSQGRSAQPTPDHGHAESAASGMADGASLTGELLDDFSTTTTTCGHESSRPARVSTSSSWSSTSPLAAANFFVPADSASSAPFCPSSGGSLSPDCSPINMAVADPLPSLLEQASPSAEKKSSKQPRQMASPASARRSGESPRSWAQRESADSWAVQRRQKKSAADQVADGERSASPTTLRASPRLSPVKVKPETAPTPRRARTPTRSSPRLQRRHPSPPPASDSEVVDDAAVGTRKRVPKQKKAAHSSSKTKCLRKMSHRSSRRSSVA…	INCENP1-INCENP2
Cystoisospora suis	SAR	Alveolata	Apicomplexa (sensu stricto)	Coccidia	Sarcocystidae	1	MLANQTEFDGPGGGESRKVIACSSALLLSTSAAVMSQVVAGAIPDNNVPTESQSCPYQTRPRGPAVREGVNASNPWGSVYPNAESSACTSTSSRDKTQEQLRCPGSGKDQLWLANRADIGEGRDPCAARKETLVVSSSAGVSNSATACAKGVSDWKTGNWNKENCERWTGNNETTRESFCAAKADLSLVCPLHAYRFSLRDFDFGGFLGDGAHGCVFVARERRSGFVCVLKCITKAHLVRGGNEALLKKEVELQAHLKHPHICCMYTWFQTSSAIFLVMEYCLKGDLFALLDKTTCGFDERTVAKHLFQITWAIRTCHDKRIAHLDIKPENVLVNHKDQLKLADFGLSAHIGGEHRKRGVSIHRGTCDYFSPEQCTFRLRGAAMRAARAAAATADPATR…	GISH, not RxT	1	MQAGLYQSPPSQRQPTPQASHRPEEAVGLHHRQGCSEVSDTPAPAMGSRASGPCCVLEDPGVRGAVFRPDGLPAPKMSEATSCREKSNLSPETASSRSISKSPGPSHHHRTVQSSPPAPVASPDAQLTNKGTATFKTQQKVTDQSKGLSGESEELGNSLMPESKSCSDQLHGESHAGAGSSGSTQETSAPQSLASSDSADGRGAVPIGLPQSETTVNEEGIPAAVNPLRASDRCSSTTDSCRRKISESTGDDRHTSVSSAHWRTPPRDESLSAETRFEMLKESMHRRLRNQNAQAEDLTTSPRRLLSSVAGTPRRNRNGTVSSGLGQSESGDVIPLRDFLWDPEKAFAKSSRENRMAEEEDEYVGPSSEETLQGCKIDDFELADPRFGGDASLLGRGTY…	-	1	MQAGLYQSPPSQRQPTPQASHRPEEAVGLHHRQGCSEVSDTPAPAMGSRASGPCCVLEDPGVRGAVFRPDGLPAPKMSEATSCREKSNLSPETASSRSISKSPGPSHHHRTVQSSPPAPVASPDAQLTNKGTATFKTQQKVTDQSKGLSGESEELGNSLMPESKSCSDQLHGESHAGAGSSGSTQETSAPQSLASSDSADGRGAVPIGLPQSETTVNEEGIPAAVNPLRASDRCSSTTDSCRRKISESTGDDRHTSVSSAHWRTPPRDESLSAETRFEMLKESMHRRLRNQNAQAEDLTTSPRRLLSSVAGTPRRNRNGTVSSGLGQSESGDVIPLRDFLWDPEKAFAKSSRENRMAEEEDEYVGPSSEETLQGCKIDDFELADPRFGGDASLLGRGTY…	-	-	-	-	-	-	-	2	MSNSFGSFLLGGLVQPLLGTLQNWTKKREEDKENTPVGGDKSSLSASSVTSSQQFGPILLRQGGRIIPADPAPPAGVGRGRARTPSHEICSARKRRKGGRKTHSCKKGHKLHRTTTGIPEESLEEIDSCVQNVSEGCLLVEKQLACGTGKVMRTPSQEEGGCLTKIIERTQVHTQPTGEEGKQEEFSRGASLPALPYIKQTQDPLQSSGESTETVTPELEIPPSSAFIHSASSSSSRSLPRPGEDVSIVSFAGGTEKQNSFKFIAGTSFAAQGRLNSLQSTQMDHSIPSNFPSLLSGSSSSCSSLVASSSLLVSSSFGGNNRVENTADARVLRHPPPIQSKTCPSSGAVSPFGPASLYSSSASAVEGRSEPGVTHDGHPGKIAEEDEEDDDCTGLQIPR…	INCENP1-INCENP2
Eimeria acervulina	SAR	Alveolata	Apicomplexa (sensu stricto)	Coccidia	Eimeriidae	-	-	GISH, not RxT	1	HPNIIRFLGSFEDEDNLVFVLQARGNKISNKPSLSFYLFFYLLCRDAGGPLSEEEAATYIKQIISALAHLHANNIIHRDVKPENIFLHSDGPSGLLEAPLAAAAAAAAAAAGEAMAVAVAAEAVAEAAKAAAGAAAGAAAAAAPAHYLAPEFYGESHDRGADIYSLGLCLWESLKGSHPTQQQQQQQQQQQQQQQQQQGRQQQWERELELEQQQQQQQQQQQQQRLQFVFEPHIAGDAQDLIKKMCAEDPEERITAAEALNHPWLCRLTGGVS	-	1	MQLPLQREQGVQHSRQRVQLPTSGAQQTPHFLPQFQKGDLLWQQQQLLQRQREVLQQQREKLMQQQASWEQQRQKTLLQSECLPQQKTKAKNSQQFSGCHEALGNFNGVQAKELSPPPSCSVNPRAALHRSCKVLDHEQSSAHVEGKRTEIQYSPRTERMKCNDPSSQGTPGLPEAPPPLKWEVSETTEASVGSSGSADFITTANKKLQFTAVGGSREQRLQLRCEVIGDPTVNSTKSATFKGTTTSEQNPLEAETDVQTDPAAEIGESLSCRQTEASGKSQTAVEYQGAGGAAEAEGECSSSDDGAPTVQHEGNAADAGKSASKEAATNTEDKTADLQVQKRFIWSPRLRRLPQDTFRIGPHDLIPVGPLIAAISSTCNGWNDENCITTENCTEDPSY…	-	-	-	-	-	-	-	1	MPNCLGAPKQNTKKSSSSSSSSISTSSSSISSSSSGSSSSSSMSFAGGALSCLGSSSLLLSSAKLLSSKFGTAFGSSSSSSSNSSSSSSSSKGGVSFPSALDSCLSEGPPLKASSSKGPPPSDKLFELCARTHRARGPQTETKGGPQHSLGASTHLLGAPIHSGGGPLTLLGAPLHSDRGPFNSTGAPIHSGGAPIHSGGAPLSNIKGGPLSNIEGAPLSNIKGGPLSNIKGGPLSHINGGPLSHIDGGPLNNIKGGPLSHIDGGPLSNVKGGPLYKAKGALVNNIEGGPLSGIGVALKGKEEGGPLNDRQEGGPLNKDEEGGPLNEDDEEGGPLNEDEEEGGPLNGYEEGCEAGAVKLLLQDKELLYFTVGHFHPKIALRHLQQQQQQQQQQGQQGQQ…	gene prediction issues
Eimeria brunetti	SAR	Alveolata	Apicomplexa (sensu stricto)	Coccidia	Eimeriidae	1	MEYCNEGDLFTLLDKTEAGFSQEQVSKMAFQIAWAIRTCHDKRIAHLDIKPENVLVNERGQLKLADFGLSAHIGGAHRKKGISIHRGTCEWFRVYRGESNRRSTQLLQQQQQPVTAQQQQELQQLQQQQQQLADALKNAANGIGEGA	GISH, not RxT	1	METPLMPSRVYGEGRQYLEMGDFELCQKTLGSGRHPNIVRFLGSFEDAKSLVFVLQYANRGTLRQRLRSAGGPLGEKETAAYIQQIAAALAHLHTNNIIHRDVKPENIFLHSDGPSDLAPELFGASYERGADVYSLGLCLFETLNGAHPTAAKHKQQQQQQQQQQQQQGVQQVQQGLLRQGEQEGQQQQQQQQQQVLLQQQLQQQQLQQQQLQLQQQQLQQQQLQQQRERMQEEDELQQQLLLQQQQQQQLEFVFEPYVSVDAQDLIRKVRRQSKP	-	1	MDEFEGGAVQNPAHHAGISSSSDVHRGRHPVPTVHWGHTTRNLRYPVQGRDGSQQRIQQSGAANPSEPRPSAPSLNLRQAASCQSPVRVPNAEAAMSLISQKGPLVQERSLGASVDKRNNSHEPVYAWMQVPLQQQQGSQLSHYHVQLRESPTQEAPQFLPQLHKGHLLWQQQQLLQRQREVLQQQKERLMQQQASWKQQRQRTLLLSKRVPEQPAQKTEPQQSPQLSQEASNISSHTQTKDICPPPSCPVNPRVASIRTSGSLNHEYSGAHAEGHRSGVKLQQSPRAESTKCSMPSFQRPSGLPEAPPPLRWEVRESPESSTGTSGGSASIAAAENKRLQFTAVGGSLKQRLQLRCEVIGDPAAMLTKSVLFRESSTPEQHPDEAESDERRYSNLETN…	-	-	-	-	-	-	-	1	MQAPSWLSSSLQLLLQPFAPSLLRKRKAAAAANTSSSSSSSSSSSGSSSSSSSSSSREGPARSFSPLKRQKLIHPSSGAFNLQQQQQQQQQQQQQQQQQQQQQQRNGLSCAYGGAAGALKIAARPEEGCSKQIKKTNKEALNCHQTKQHLAVYGQPKQQQQQQQQQQRQRLQQQHPLVPPLKLQQQQQQQQQQQQQQQQQCGKPLPFPTLLPSALHKQQRSTRPAAAAAAATAAAAAPAAAATATAAAAAAQGPLDCLSLGLSAAEGIHRTKLPPAPSAAAAAAAAAAAKCSSCPPKAENTILNKPVALYNSRQQQLQLQQQQQHVQRQQQHVQQQQQQQQQQQQPQLLLLSGRKYLSGYRRGDKENNIIKPNTKSSSSSSSNSSSSSSSNSSSSSSSI…	gene prediction issues
Eimeria falciformis	SAR	Alveolata	Apicomplexa (sensu stricto)	Coccidia	Eimeriidae	1	MVQEDEVMGNITSKEWTDKVTAEAQQNSAIRNKLDNMSPAFKDFLGCCLHRTSAKRPTAEVLLQHPFLELYNSAVKSSLVFLEQPRHQRGHKGFNQPGMPWQTPRHLPT	GISH, not RxT	1	MAAKHHPDLIMCRKQPGIAIGRLCEKCDGRCPICDSYVRPHTLVRICDECNYGSFQGRCVICGGQGISDAFYCKECCQMEKDRDGCPKIVNLGSAKTDLFYARKQQLLLLVCVGTLDSGWLYTPAALHPQMAGSSSSQARARSRSRRNPSSRNSNSSLPLSARAVFQRPAGPPEKNREGRRLVAKRGPLAAPSNPQEQLPEGPRAGAPPPPTATVAAAAGGLLTTMFSWLARGSSGGEEGPGACYAQDQLLTAREDFVYEEMDVHQQLQPQQQLRLQPQQPTTAETPHEFFSPQSGSPPSERSAEDGGGTEDQQQQQQQQQHWDTSPDSHRERLQGRGNAFAAVQHQYDHPLCPEQQQQHRQQHQLQQHQQRTRGLPPVPSHARHAGADPLWLQQVADR…	-	1	MQQREKSPGPHTRSQLQPLLGRNPAGVAGGPPGSREDISARNPSRSVRANSPQPPFWWPVSLSPQGPPTNSCVGTAANVASLARQGQPGTSRYPSPVGGPHVPHAAHAVHAPHAVHAPHGDFKKNRSASTPPLAGRLSPSLASRFWAFVRGQKETPPPPEKETAEVQQPLHAAGGNQMYRPEKGRTKVAATVSWAHPSPEVLPHAQRMQPGSQQQQQQQQQQQQQQQQQQLRIQQQTGGLRETAQNLNLLPSLQQQTGVSSAQNAAACMRMQQRETLRGEMGPPDGWKGAGAQETPRTSPLLAQQQQQQQQMKCLYTQQAGRQPSPPPIEPLQFGTQLQRESFLWQQQQLLRQQQEVLRQQKEKLLQQQACLQEQKRRAQTKGEGVFPPCMQPPKQQEA…	-	-	-	-	-	-	-	2	MKGQLAPEEAADGGQPCAAAEFTNDILSCLGSSLQTLQTLMEEGEYDEISDVFLRICKEGASKGLLPLQNRSKVLHTTAGLSDEASTNSGVCTRMYFGATRPSSASTAVPSSSLSLSSASMEPSAASDLPQASGSINTNLNLSLEYERKAGRNTGRCIDTSSVEGRRVTEGRCEDSKTNTRTSAGASAQDSSRRIIENSSANLLNKDASSCLARSSKTRDLSCDIQEKAGGNTKTQSGSHAAFLARRSPRLQKARQGTLLHELHFSSPASAKQSLPSQQQQARRGGPPSQGPPSAKERSKAQQLNAAKRRQGGPPLSAEFENKLNEQHLEDLSCSCCKGGQETNQQTHPNHQEPAVAALSPPKNAACKRKRFGREVSAASSSGKKASRGESQRTKTWQR…	INCENP1-INCENP2
Eimeria maxima	SAR	Alveolata	Apicomplexa (sensu stricto)	Coccidia	Eimeriidae	-	-	GISH, not RxT	1	MLPLLQLRPPAETAEDAPMHTAREDLYEGEEQQQQQLLLLQQQQQQRMAMRMWMQQEELLMQQQLQQHQQQLLQQQQQQQQMHSAAETAQDFFSPVSPSEQSIATPNEEEELLLQQQQQQQQQQQQHQQQLQQLQQQQLQQHPQSVFSDHRDPQYYDAYSASHQQQQQLLLQQEQQRLQQQQQVHATARHAGSDPSWLQEVADRLLEQQQQELLQQQQQELEYQQQQQQQRLQEQQQQQHLRRHCFLEEQQQMQQDPQIPKFPWHQQQQQQQQQQQQQQQQQQQELLQHTAAADSQQAATPYSSVSRCSLDSSLEWQELQQQQQQGLQQQQQQELQQQQQQQQAHQHLQQQQHMLRGRTPSWDMYHQQQQQHQQLQQQQQQQQQQQQQQQQQQQQQQQQ…	-	1	MNSSNSKGTACSVGRTMDRQGSPSSTRSAAMRLAEMARFWSPNNARQARERAIPATQSAQQMLHTLRPSPLPPPMSRSRTAVSCGSLVPPGSTPSPQQAEQQAQPGPHQPHAQVLWRSMTPSTFVYSCYRQRQMTARPASTGPRLVPTRTIEVDGQPTQARPQHPSQPSNTNSGLWPGSWAILADRNREFISPQHHACPPVQLAQRSYQLPCASGMEGSPSIQSRFKEDGRPPFTLYPAAVAREHCTLPLRQRPARGNSPGLQCWRPHSVPPQGSSDFRLAGSPNSLHPSNVSRANVGRGVPRLSPAQKPQKMKVEVNVSRSASTPPVPVRQFPSLASRFWSFFRGLREQTVDCEREADKKRVEHARAFPSDNLPKGRHPVPTVRWAHTPRGFRHQVEQ…	-	-	-	-	-	-	-	-	-	INCENP1-INCENP2
Eimeria mitis	SAR	Alveolata	Apicomplexa (sensu stricto)	Coccidia	Eimeriidae	-	-	GISH, not RxT	1	MMIRPTMVATQNRCIDSPVWGRTYSPVDFPVPNQSQAASAGLPTGANGFMRLRPSNSMPCGLPWYEFKQEPPPHSTPQHASPEVLPAYIQDSSTRMWKSAGSFSSRPGGAPCSYGGYTSSRSSLVSYVPPKDVRRACRAQIVKQTSLPEKPPIISQNYNLSGFSAASEATGPDKVTGPPVRRVEAPVLFSSFFDRMQLGHIVAAKDKILKKVKNRDVEGTAMSEASFETSMSDDGRSTRDQAMQFMGAVDLRSLYNRYQKSEEIRASMSDRETSASQGTAEPSPPASDSEIETYVPREKVFRTEAAARLAGSPAPGKMPSHVGTTVGMRVVSAWPRPAEQRHSARRQMDARSVTQPRQSSSSRRVCRITYRRRDDAKSPPPELPRHALNKVAVEGSYTH…	-	1	MWNRSAEHQAQAGPHKPHTQMLWRSMTPSTFVYSCYRPRQATARSASTGPRAVPSHAIEVDGQPAQTRPKHQPQPNNTNAGLWPGSWASLADRTRQFIAPQQHLCSAVLLTQRNGKVPSVPGMEGTPSIQTRLKKDVRNPFTFSPAAVGREQCAAPLQQQPLRGNSPGLQRWRPHSVPPQGHNELRRAGVPSSLHPSMTFRTNEGGRIPYLSPAQKQQKMQAGVSVNRSASTPPVPGRKAPSLASRVWSFFRGSTEQTDDCEGESVQKQTQDALTSSNSDVHRDHHPVPTVRWAHTTRDIRHQAQRGWNNSQQIIQQLQAMNSPGSRPPSPNLNLRQRADYQPSARFPPAGATESLVSQQNPAAQERLLGACAAQEQNKRNMSHEKGPGKMQLPLQRQQ…	-	-	-	-	-	-	-	-	-	INCENP1-INCENP2
Eimeria necatrix	SAR	Alveolata	Apicomplexa (sensu stricto)	Coccidia	Eimeriidae	1	MAFQIAWAIRTCHDKRIAHLDIKPENVLVNERGQLKLADFGLSAHIGGAHRKKGVSINRGTCDYFSPEQCLARMRCMAAERRRQLQQQQQQASDPPTEQQKQQLLLLQQQQQQLAEALRNASSGIGGSFDEKSDIWMLGILAFELYFKAPPFGSQCMVQEEEVMRNITSKAWPDKVAAEAKTNPKIRDKLNSMSPHFKSVAAAAAAAAAAAAAASVTEEVAAAVAEAAAATVTTAAAAAARAAAAAAAAAEVVTAEVAAPVAEGTAAVAAAVTAAVAGAVAAAAAAAATAAHKIAEVAGAVAAAAAAAATAAHKTEEVAAAVAAAAAAAAAVKTEEVAAAVAAAAAAAAASSVGCSFASRPLVRLCCGWQQQQSSEVIAAKQND	GISH, not RxT	1	MPQLPITAARNRSRSRGSICRSSSNTSSSNSSSSSSNALSCRLDLRQREVGPTARREPLSAARNRQQQQQQQQLQQQQHKDRDARATVAPPGAAPAATAAAAAAAAAAPAKMLSWISRGPPEGALQQIDNEEPPMLTAREGFTYGEADASQQLSREQQQQQQQQQYGCPQQQQQRWYPQQQQQMESAAGTPDDFFSPQSASPASEQTPELTELEQDQLQQQQQQQPQQWLPQQQQQQQQRLPQQQQHRSYSASNFHQSSTAHRVEQNCGPYSVWSDSQQQLLRQQQQQQQQQQQQQQQQQQQKPHPVSVRDSGRHAANDPYWLQEVADRLLHQQQEEQLQQQLLQQQQQQSQPLEQQQQHRYCFGGQQVEDLQVLQTSWQQQLQQQQQLYAQQELSLSQ…	-	1	MATSGSRGIPSPPGGPLSTHCSPHVLRSPASGLAGAARFWSPNDVRQARGRQLPDIQMMHQSLHSSTQSPPFLPLGPNKPLVRHGSPAQAAGTVGMTQRAQMQAPASQNQQHAQLLWRSMTPASFVYSCYRPRQTAARHSSTGTRLRSKESTTVEAQPVQERPTHQPNGPNITNNFWPGVWARLADKTHQLVAPQQKQCPGPLVTQCNNELPCALNTGRVSSLKPQLKKPPGSTPAYALPTGHAGKEQCVPHIPQHSVRGKSPCAYGWRPLSVPAQNHSRPRQPAGMERARPSGPQRGVVAGSLNAVGASESQRAQNDVNSNRSASTPPVSGRQSPSLATRIWSLFRAPTEQRAAYESVAAQGSPPDARLRSGSGGARRVVPTVNRAHAPQDISNQILL…	-	-	-	-	-	-	-	1	MDTSPFSGCMDTSPAMSRASWLKDWLPRLLLNPFRSSLSKKRKAEDSSSSSSSSSSSSSSSNDAAHPFKKLRQQIPSRANDRPAATPSSLSAAHSSQQQQQQQQQQQRSGVYAARSLRAHQLTPLVHKCRDAEINKIEKVKTKQAASRGVYRQLHSKTQGLQQQQQQQQQQQRLVPPLSLQQLQQNPQHPRPFPSLLPAAAAAAAAVEKPQTSVFLCKGPAATANTAAAAAAAAAAAAAASGLSSNSVAALRGNRLHPLPATAAATTTTTAAAAAAAAAAAAARSTSSLPLLPRLFAASPLRSRSTSALPLLAPAANRPPALLPQQQQQQQLQQQQQLQQQQQQQQQLFLGRQQGQAAKLRNSSRTEAENAQRPPRPLECSSKSFSISSSCSSSSSSSS…	gene prediction issues
Eimeria praecox	SAR	Alveolata	Apicomplexa (sensu stricto)	Coccidia	Eimeriidae	-	-	GISH, not RxT	1	MHRVKEHMLSRGSPATAAAATAAAAIAAAATAAAATVAAATVAAATAAAATATALQQQHLCQHRHNVKPENIFLHSVGPSGLLIAAAAVAAAAAVAAAAATIETAAAIATATRSVPLCLERGLGLFVVYADLAPELFGDSHERGADIYSLGLCLWELLKGSHPIAAADSSNNPQQQQQQQEEEEQQQQQQQQQQRLEFVFESFIATDAQDLIKKGLGFGS	-	1	MQPPQQRFHTLCPSPQPPPISPHKAVASLSPPLPTGSMTLTKQAEQQTQADTHQHHPQMVWRSMTPSTFVYSCYRPKQAAARPASTGPRVAPSKTIEVDGQPAQPPPKYQPQQNSTNIGLWPGSWASLADRTHQFIAPQQHRCPSVLLTQRSGQLPCAPGIEGGPPIQTRFKKDGRNQLNLCQAVVGRENCTVAYGHQPARGNSPGVLCWRPHSVPPQSHTEFRRAGAPNSFQPSVAFRTNSLGRVPYPSPPQKPQTMQAGGHMNRSVSTPPVPGRQPLSLASRFWSFFRGSVKQTDDCEREAVQESAHHRSRNPVPTVSWAHITRDPRHEVQQGWGNNQKLTQKPQAVNSRGSRPPSPNLNLRQETCCPSSVRFARADATGSLVPQQDPIAQGGSLDA…	-	-	-	-	-	-	-	1	MPQQQQQDMQQQQQQQQQLQQQLQQQLQQQLLMLLALSPSQQQQLEGSRPLWAKQQQLQQQLQQQQSIDPFSVFGEAPPEIVLDEVYGQQHYEAAGPLALSSHPVLSKLAIQIHKNKSSSSSSSNSSNSSSSSSSSSVVGFGSVTQHQQQQQQQHHHHQQQQHLQQQQQQQQQQQKGDDGFEIKIDNNVWIEDILPALKKRWRQDALIELDWREDPLTRIEFIWYKKTLNINNNNNNNNIHNIVSIKQICFCPTPPPYRLWAWTDTRHRLRKQFEAAAAAAAAAANPAAAAAANPAAAAAAALDDDDDDDDDDERGEEGEEEGRQKTDRTHPLVSLSLFLSPSPPKHKKMKHTNAAANTAAAAAANSNSSSSSSSSRNTNSRNALRVTPAAAAAAAAAA…	gene prediction issues
Eimeria tenella	SAR	Alveolata	Apicomplexa (sensu stricto)	Coccidia	Eimeriidae	1	MAFQIAWAIRTCHDKRIAHLDIKPENVLVNERGQLKLADFGLSAHIGGAHRKRGVSINRGTCDYFSPEQCLARMRCMAAERRRQLQQQQQQQQQASEPPTEQQKQQLLLLQQQQQQLAEALRNASSGIGSSFDEKSDIWMLGILAFELYFKAPPFGSQCMVQEEEVMRNITSKAWPDKVAAEAKTNPKIRDKLNSMSPHFKSAAAAAAAAAAASITEEVAAAVAEEAAAATVTTKEAAAALAGAAGPAAAAVVVAEAAAALAEGAAAVAAAVTTEVVAAAVAAAGAAA	GISH, not RxT	2	MAAKHHPDLIMCRKQPGIAIGRLCERCDGKCPICDSYVRPHTLVRICDECNYGSFQGRCVICGGQGISDAFYCKECCQMEKDRDGCPKIVNLGSAKSDLFYARKQFGAKRN;MPQLPITAARNRSRSRGSICRSSSNASSSNNNSSSSSNPLSCRPDLTSRRITLIRQREVGPTARREPLSAARNRQQQQHQQQLQQQQKDRDARATVAPPGAAPAPTAAAAPAAVAPAAAAQSPAKMLSWISRGPPEGALQQIDNEEPPMLTAREGFTYGEAGASQQLSREQQQQQLQQCGCPQQQQQHWYPQLRQQQTESAAGTPDDFFSPQSASPASEQTPELTELEQDQLQQQQQQQQQQWLAQQQQQQQRLPQQQQHRSYSALNFQQSSTAHRVEQHCGPYSVW…	-	1	MATSGSRGIPSPPGGPLSTNCNPHVLRSPASGLAGAARFWSPSDVRQARGRQHPDIQMMHPGLHSSTQTPPFLPLGPNKPLIRHGPPAQAAGTVGVTQRAQMQAPASQNQQHTQLLWRSMTPASFVYSCYRPRQTAARHSSTGTRLRSKESTKVEAQHIQERLMHQPNGPNITNNFWPGVWARLADKTHQLVAPQQKQCPGPLVTQCNNELPCAPSTGRVSSLKPQLKRPPGSTIAYVLPTGHAGKEQCVPHNPQHSVRGNSPCTYGWRPLSVPAQNHSRPRQPAGMEKARPSGPQRGIVAGNLNAVGALECQRAQNDVNSNRSASTPPVSGRQSPSLATRIWSLFRAPTEQRAAYESVAEQGSPPDARLRSASGGARRVVPTVNRAHAPQDISNQILL…	-	-	-	-	-	-	-	1	MRPEEAPEDAGKPRRCAGVSAASSPLSFCVSSSLRNLKSLMEEEDLNAISDIFLQICKNNSLSCPHCKSETPPRPSSASTAAPSSSLSLSAALVAPAAAEPRGVRTPERMHSARTPERMQTHPRPADAPQPLLPFSSKCNSAKDTCAGSSSSSSSSSSSSSSNSSSSSSSSSSKVAEEASLRLATPCKRVCGSFVESSKSKQRDKTSLNKSAAASLTRRSPRLHPPAAAAAAAAAAAGRGSLSRAAAAAAAYGCRKRRQEEDAAAREAKNRKQTKDTRAAGARAAAAPAAAATAAAGADNVERGGLSPLKTDDSKRKGNSKSELLKNSQKDLTEFGEGIKRKEKGPQRKLRRVEEGRGERKGTGVSSCVQIEEISEGEEEPSCEYSFTGEARKDESEAP…	gene prediction issues
Cyclospora cayetanensis	SAR	Alveolata	Apicomplexa (sensu stricto)	Coccidia	Eimeriidae	1	MVQEEEVMRNITSKGWTEKITAEAQHNVAIKEKLNGMSSHFRWVSRLSKGRKEGKWQNTRAAEVGGQVCLVVVCLKTQFLRCQG	GISH, not RxT	1	MFAPRQLHRPPSQAARKRSRSREITSSCTSGPTSCSSINYRPTALQYREGHAASLRDWSPLPRAGVLPATSQPQQTRTQRHIEAASAPRTSTAVAAAASAAQAAGGLLCTMLSWLSGCSNGEEIPCTEHDEAPLLTAREGFAYEEVDMHQLELEEFQQLESAAETPQEFFSPRSSSPLNEHSVGEGGLGHDQRQHQGREQGMLQPQHASSAALSCRQRRDYCPPYPEQQHPRQLSSGPLIQNTARRHAASDELWLHEVADRLQQHQQQLQLQEHLRYEAAHQKRLLERREEPCTPLPRSVSMASSCADVSSMSALRQQQYRQAQEFSRHQAQEFSRHQTLRRQPKPLPPQRQGLSFPQESSRSSSVGVLSRRPTQQQQRGATPATGEKILAASKEVVAA…	-	1	MLYAPLVCPDAGSRHPKGSRWMLDNGSIELPYTFLNRSKAESYFQDNAFSLLDNSSHALGSEPSSDKVSVGALERSPLSFPQKSKITEGSAAGADVFGGSLSPASPQTFPLPLTDGLQREAPKPSDNEFKEEVVGVLTPAHYATYLHWDISQKLRMNPGVTPIIRARWHTGEQFVAAAASLRDDRWKPFFYIVLAQYAPVPSQKSVFFSSEGSLALIPATQESQTDSNGRLLPYPFFLPTPLQLLQGAFGKAYAVKELGNFDTSVSAPAYGDNEANDKQPGDAKTASFPEQEFPAERSNSRRDTSTFLRWVPFGLTRKYSGIGNAHLEGSLERPPPEEDTMVEVAKRDNEELFIEALSRELPNRWLEAPDGRRLVIILNDQIMECRNLLHLAKSAANDG…	-	-	-	-	-	-	-	2	MSALQAQQEVDPFSVFGDAPPELVLHEVYDQQHYSAVGPAIRASHPILAKLDRQRLLLPPAPGNGGCGSKSGGNSLPTVQAQQHAASGVPDKLHLTREMWEEVLLPALQSWWCAESAVELDWRQDPLTAEDCAWYLQAIGASRDLTDQVTLKQPCFCPTPPPLRGWSWTDSRHLLRTKLASGTLTKAAGESGCSWPSFSPPKRRTEREKHTRVFAKQRETGAPAKRRGAAAFAGAAVTVLSPITPGVRHRRQRKYAEMCAPPEGAPASSSSKRSRKEAPRHRCPSDGSTRMTANSSRSAAGAEGGSFTRGVTSSSSLTGELGELLADAQRRLDSLAERMRSRSRSRSRLPPKASNGTDAAVGAASRLVNRLSGNSLAGRAGGRSLSGDAAVDPRPQGHG…	INCENP1-INCENP2
Eleutheroschizon duboscqi	SAR	Alveolata	Apicomplexa (sensu stricto)	Coccidia	Protococcidia	1	MAANSFLKSASRAGAWNDDTTLSCPPAVYVSDQTTASGRDFADCSLASRKMSLLDASSSQPDPSHLAGLSPIAKGPTGREDHGDRRLACDASAASQSFALPLYRRGFYQEASPSGGRPRQEDEVGAPLEETRRGLAVSHGGEKRKILEDPGRPGGRPYGKKPKIGQSLLSADAGGGDAAASPAAGDELNAQRPNYSSDIGGDQSRPPGFDVGAVHTALTSNPQLGQLAPLEAEPNAFHVHQLGPQAGGGSADCGAGRGAQAQKLGQGPAVTGAGEDKQEEQAAKKKETAKMPNTGAAASAAGTVAKVKMATVGGSAAVQNDKPSTYYARTDMALTDPSHCLRFTLRDFDIGKFLAGGAHGLAFVARERRTGYIVCLKSINKIQLLRNGMETILKKEVEL…	GISH, not RxT	1	MARCVHLPNAVESPGINEPLTPPAQCDNQDGLDNVSSSPISVETNSASTLPCKLSESFSTLNIDCKDSTISKSTESLTMAKNALDCSSGSTALNSQARSASKERPRSVMASQNLTSASTAKCPKGAVARRRPVPHYSVGTSTPPPPCRYETEKNGKHGGEESMTTGPNHLVNPAYRCPSGTIGKTALDTKHGSVGVAPTASSSVIRKPAWITALRNASEHVSNQTHHSSNRNVPHATTPTSMHEPGFRFGNPTGRLFEDVAKSRTGAVVASAANAPRWLSNVRPRVDTGLNDERRSRPVAHPHRHVPCSSLQPLAVPSSQGSAGLKMNAYSQPDHPPAMQQSSPASERSARIVSTPVGKNNRSVFPSTAEPAGALGDEASSTPAEIANAEASPSVTATP…	-	-	-	-	-	-	-	-	-	-	2	MNQQQGRARRFGATHRGASPIAGRRPTPRQLGYASPSVKGSPLVGSRALPAAAGAATRVRCTPRVSNSRHAGAAAAGRDPPRNHLEQQQARRSSRDRQEPGCPQPVGATLQPPFGRRKLLDACSPQSGSGLPRVPGGPRPSPRFAVDATRTAGSAASDKYNFSAHASCIGFSGAKPCVAQGTSGAVVPAVISAASELQAAMGCGGDGSGSLCAAATGVEGPGQPPSADCSWGSASGSSSTTASGCDSRLVTTACTDDFEVPPKTKHHFERLPASHLLLGAVNRPFGHRVLLPLPSKVPDENFNAYKTMQDTCIEKRNDDALCALAEDQELRWYGGGTYGRNSALQRELPVWASTSNVEKAVRKQDKWIPSSIFGTAPPAMIMKDILSNWHFSMIQANTW…	INCENP1-INCENP2
Rhystidis sp.1	SAR	Alveolata	Apicomplexa (sensu stricto)	Marosporida	Marosporida	1	MSFRQLVVPSQLCAVEEYRDANGKLYANHGGGSTSSLVSLQIQSEQQDLIDQLAAMDDDAETLKHHLQHQTEQQQQHGNMEEGFVGMTFQSSSSSSAAFGYSNSSYSSKFGAGGIVSSTFPLSSPPIGGVCFGNINEGEEEDRSNTTNKTERLGTGNSGADPEEPFHIADTAAAAAGHERRDKPVPALVLVNNKGDAIGTESGGHVENSGAQCQQGSSGCCRVICSSRQHISLGIKASDKLLPLQTTITPAGRKDVRPKETPENARSHDRAMEPSYSHGMSWSTEDFLYDKILGEGVSAVCVSAIERRSGLAVAVKMLSKAMIVRNRQEMHIQHELELQAHLHHPHIVPVLTWFHNSHSVCIVLRFCDGGDLFGYLHRTNLNVDETATSRMMFDVLYAI…	GISH, not RxT	1	MRDASRHGITAETKSASSCLDPVGDSGPTAVVAVTAVSGRTALTGATAVASVPAVASVASVTPVSSVTPVTSVAAVARTAAVASVTPVASVTAVGSATTVGSATPLLSGVGCLVAPSGPPPIKNSKNSAKTSTKVGSLATRRSSAAVTISGGSARARSLSRSSTSASTPAASRTASMSTSRRQPATTDGVRPHSARNARRGGRAYTRGVARPSSATTGEQRFQGTYEGDGNNSDVDRCGGESLRNGGDEEFWSCRQIYLEPDVNPEVSRCGVSAASAATRCGPTSTAAAAAAAAAATNTATEHVPAGSATIVLTGNVVVPTRSANVSSTMGATDTGAVPVATHARQATQAAVSTTHQICSVAPHVTSPAATVGNASSGGMLVGAAAGTAAKIPTIVPAA…	-	-	-	-	-	-	-	-	-	-	2	MSFAPPPPPTASGRQPSSISSSVKAVRPSPFGLPPKPRQNARKGRTATSENQLRLDTFCKRHENPAASGHTEDPHLVVVEQQHQQPVVQQQSQNLSLHPTETHQHVQQQVQPMQEQQQRPQSSPQVQNQGCRGGVARGLPDGREPRTEQRTSTSSPADGARLQRLVDRQQKEIESLRNTLDQCVTGLMDCQGRLAAIEKERNEDRREREEEEALRPEGDEDCDRISFVSSKSKPTPIRSPIKTMVESNSFSCSMSFASHAKSATAAGCLGLPIHHEQHATTAREEKSAARGTSSSSSCCAVGQPVEETKVTPRRSNSCAALPRPQVGADAVSRSRSRKNNKRATSARPSVNDSHLRETKRHAGKDVPVLRPGVEGGENAPPVSQGNCTPRPCCSSNGDT…	INCENP1-INCENP2
Rhystidis sp.2	SAR	Alveolata	Apicomplexa (sensu stricto)	Marosporida	Marosporida	1	MEEPLSGPVKVLPSQDRRLAKQLLREMRDVCLGRSPPDPQAYHTPVHSGQECAGGTTANCGGERDGRTEGVDECGASLCPSGIINSMHSAMHSKHIIQDESSTGSHPEPPLFGLTLQPCTKELQDNGDASGSSTSLYESSSTGNSLPRAESEHSNRRERFDDWGGGARLIRSGAFESVRAGSTAVRSPLLARSVDLAMQPQYHSLEFSFTDFEIKRVLGEGAMGVCVAARERRTKYPVCIKMITKLSLAKHNQEYVVKNEIELQSHLHHPNIVPLLTWFHDSTRIALVMKYCSQGDLFHFLSRKPRVDAKTTSRYLFDVLWALRYCHHSKIAHLDIKPENILVHRDRLLVGDFGMSEHLNTYTHGISKERGTHDYWSPEQTVRGDEYGKFDTKADVWAV…	GISH, not RxT	-	-	-	-	-	-	-	-	-	-	-	-	1	MTCTIPTLPRHPLSSYSANKAATAAHHTPIHSHAHRHTPSPLLPPSPDSPLLRPSSFPSHNLCSPILSRCRRRFSVHNYHKVMRPLPDHVVKEGNDLVRMLCNHAIGPLLQDIATAKQINDWKTVGELEEMARLGKEQVESSTVLWEGGERGAGKEDKEGIVDEGEGRDNNDKEEEKEDLDKVDSFSVFGHPPSIHIGEVLNKDLYGKGFQGWKRGSHVCMYFAKKNLNIRTIDHTCFIGVMDDYVEGKSMIKGNWRGKPVLDERLEWCRMYGGHSINWEDQVSFLEKCFCPTPNPSMKWQWNFAKISVQQQTKDHACNNSLCCE;	INCENP1
Merocystis kathae	SAR	Alveolata	Apicomplexa (sensu stricto)	Marosporida	Marosporida	-	-	GISH, not RxT	1	IKLADFGWSNILQSTRPRSTFCGTLEYLSPEMIRGEGHDEKLDCWSMGILIYEFLVGRSPFAAPSQDEICRRILRSEVRWPSSMDADAKDLIQRLLRQDPS	-	1	IKLADFGWSNILQSTRPRSTFCGTLEYLSPEMIRGEGHDEKLDCWSMGILIYEFLVGRSPFAAPSQDEICRRILRSEVRWPSSMDADAKDLIQRLLRQDPS	-	-	-	-	-	-	-	-	-	-
Margolisiella islandica	SAR	Alveolata	Apicomplexa (sensu stricto)	Marosporida	Marosporida	1	LWAIRQCHGNKIAHLDLKPENIMVHNDRLLLADFGMSAHTYNTCGNFHTQRGTHDYFCPEQTAHASGKLDHKADIWAMGVLAYEILFGKPPFGSTLDKNFSKEMLFESIRNADWKCNLNKHFAERKVSGISKQFQRFLDCCLRKNAKERSTAEDLFDNEFIVMHNGDRLADERFQRCPYKRWGGFN	GISH, not RxT	-	-	-	-	-	-	-	-	-	-	-	-	-	-	-
Gregarina niphandrodes	SAR	Alveolata	Apicomplexa (sensu stricto)	Gregarinasina	Eugregarina	1	MFAMESGGALSQPSLMNAGSVSVGPSSQACIPAPKDEEEENVTSFDTIRDVMIIQDPIAPVWTIDDFEIARKLGQGQFGNVYLARERRTKYVVAIKAILKTQLLQSSNEHLLRREIEIHSHLIHPNILGFYGWFTTKHCICLIIEVALGELMDQLEAGGLPEPTVSKYMLQMISAIRTCHKLNVIHRDLKPENILLSHDGMLKLADFGWAAHIPDQDTNTGVCANTGVSANTVGLSAQRGLQNSSNRPRTPQYDYLKNRRKTYCGTLDYLSPEIVRHEWYGKEVDLWCLGVLCYELAHGGPPFPCQEYKAQGFKEADARKQQQQDIQQCSIEKRLLPSMSNELKDFLRKTLHKDPKLRMSTDQMIVHSFITKFNDINKELAL	-	-	-	-	-	-	-	-	-	-	-	-	-	1	MTLVREQANWNPYSLFGTGVRVVQFEDVFQTPDFHEVSELKRQSAGRENRMMRWYNDQASCGFNEGEGMTSDQLDRMVLALSKTYDLSDIAYDSKWTPCTEECNHSISRKQPWFKAEPL;	-
Polyrhabdina sp.	SAR	Alveolata	Apicomplexa (sensu stricto)	Gregarinasina	Eugregarina	2	MTFSIFKTDQFQNIISTHCFNITVAHFYDNGHYLFTISFLINSYSPMPTMPEESKREWTIDDFDVGRWIGKGKFGHVYLAREKKSGYVVALKVMFKAELEDAHIEKQLRREIEIQSHLRHKNILRLYGYFYDEKKIYLILEYAAEGELYKKLRKIKTLDETASAKYIAQIAGALMYLHKKNVIHRDIKPENLLIGINGELKIADFGWSVCTDPTENRRTTLCGTLDYLPPEMVERKKHGNKVDLWALGVLCYEMLVGSAPFEEEGHARTYRRIKNVDLKIPDNISKEACFVIESLLQYDPEKRISLVDLLNCEWIAKNI*;MANQQINKENREKHHHQNDALVNLDEHAPVWSIGDFFIGRRLGEGQFGTVYLAKERRSNFLLALKAIKKSQLLMSYNE…	-	-	-	-	-	-	-	-	-	-	-	-	-	2	MCELLLRSGETKNRASVSGMHSWESRNMDEMVDEADANDQINQNPSEASECVMQYALIALQAHTECFFKLSERISQNLEEVAEEYFLETEKKLGLLEASLSSMENQNHVSGNIAAIPLSLFLSQHSPETNASNSEELAQEAVSDISIALRDILRPGLHKLSPEIENLESKMLKVSHEESFSCRRSSLASTKRKLNESISSNFNNVFTPIVRSSYGIGVPQIWARMSNLPSATPGLAKRVATFRASLEKKTAEEEALKAQGVPNESNETHIAALQKVAKEVAGGQDLTAPRLKRTSKTPIAQMVEMFEKRTPHKTNTGPGLIINEITRPKTTEIARRVGQLKVPGHYVFTPKRSSIEDLATAFATTGVEMKATKPSEPPMECPAVEEEKYVEVEIERHHY…	parallel duplication
Monocystis agilis	SAR	Alveolata	Apicomplexa (sensu stricto)	Gregarinasina	Eugregarina	1	MNPHNHSNHQQQPHRHQHHRRRPSDALVMMDSHAPVWGLEDFDIGKKLGEGQFGSVYLARERRSGFIVALKAIKKSQLLCSFNEHLLRREIDIHSHLLHPNILQFYAWFTTSTRIYLVLEVAPLGELMDKLNQGGLTEPEVAKYMKQIISAIRCCHSHNVLHRDLKPENILIDIHGNLKLADFGWAAHVPSDPMPFADHHGNQPTESPSFAYLKKRRKTFCGTLDYLSPEICRHEWYGTEVDSWCLGVLCYELATGGPPFSHQPYQKNGISESEARKRQQKDIQECDIKSRLLSSMSMELRDFLVRALAKDPTKRMTTAKMLKHPFISRHCSLSDESDLSNCDETPNARARNAESRPVTLLRTDLGHDAISRGQQQLQKLVPAGPIIAPQPGTAAMMKQ…	-	-	-	-	-	-	-	-	-	-	-	-	-	3	MIRNWQLEPQMDNEEKPIEVKKEVKENSEGRSKIDADGDEQMNVVLGDDIDDDYDDGEDGDEDGDEDGDQDGDQDGEEEGEDGDDCEEDESDNNDEEIEDSSEGEDGGLKDTESIEENEEVKQRMQEQATTTTTSPNNDNDDHSDQPRSTSSSDLIVSSTRWHEEQYKLQNSDDHSGHILTSLKPCPNIQACPNSQACPTSQTCPKTGDHQTTIITNNIDSRNCKPQTSTISPNLLPVSPIVSKKADVDMLEQPLKRSRKSPPISAAAQLSASKQHQASSSTSGFLFNSSLVSTAIPRAQPNVSMLKLSAIQQPPSTITDEAKVYYRDGDGKLQGLEASRAAELGTRLTPRAPPQRRRMHRFLKKIGDKNWSDQADLSESDDKCGKSGARYASWARNTA…	parallel duplication
Lecudina tuzetae	SAR	Alveolata	Apicomplexa (sensu stricto)	Gregarinasina	Eugregarina	1	INAEYMGLQKRRKTFCGTLDYLSPEICRHEWYGPEVDVWCLGVLCYELATGGPPFSHEQYQQNGMTEQESRRCQQRDIQNCDVHRKLKAWMSTELKDFLTKALAKNPAHRPSTAMLIKHPFVQKYNALDDESDV	-	-	-	-	-	-	-	-	-	-	-	-	-	-	-	-
Pterospora schizosoma	SAR	Alveolata	Apicomplexa (sensu stricto)	Gregarinasina	Eugregarina	1	MIESMYNGSCRSPTTVGEPQDALVVFDHHAPLWSLNDFDIGKKLGEGQFGAVYLARERRSGFIVALKVVKKSQLLSTFNEHLLRREIDIHSHLLHPNILQFYGWFTTSTRIYLILEIAPNGELMDQLERGGLPEHTVSKYMKQMISAIRCCHKLNIMHRDLKPENILLDVSGNVKLADFGWASHVPTQPNNCDHMVLGEGVHRGPQGSPTFRYLQKRRKTFCGTLDYLSPEICRHEWYGPEVDVWCLGVLCYELATGGPPFSHEIYQQRGMNEQESRRCQQKDIQDCDIQRKLKNGMSSELKDFLVKALTKTPSQRPTTLSLMKHPFILKYNNLNDESDIEDVPQQKSEMHQQRALYMPYIPNSPMPATSLPTIREQ	-	-	-	-	-	-	-	-	-	-	-	-	-	1	MTYETCSTATPHDRTHHSYQSRMLFSPSTSSTPLLNRAAESESEERRLKAELKMKLTKERRDRVFEEKIRGYEEKLHLKMLISSRTSSQRRAMTEQFLMSRQKSNLSKLKTPKDIYYHLRYSPKSLNIKSPFEKALNANISKHDNSHKSSTNINNKENVILRVKDDTPPASSVKRLQNAAATTAEEIKIENKDISLQETSNVYLKTPKPEEQANVISDKIQRSTPSQRRMHRRLRPVGPKNVKNSVPVTDEEEDWILKDAAKTNKVAPWAEKNSEWRAVVEQQQRIDALSIFGCGSRPVNFQEVFQTPDFRRAAQEMIHRRRENNPRIGDLVTRDGRKEMEKRWELDREYCGFKPYEGVTIAAVKRFKQRMQHVEDISHKVWESSWNICDNECEHNSAI…	-
Heliospora caprellae	SAR	Alveolata	Apicomplexa (sensu stricto)	Gregarinasina	Eugregarina	1	MTTETDFLSHSFPPKDLGAPTWSLRDFDIGRKLGEGQFGCVYLARERRSGFLVALKGIIKSNILVSKSAHLLRREVDIHSRLLHPNVLQFYGWFNTPHKLWLILELCPSGELMDRILGGGIKDESKVSRCMKQMIQAIHACHEMNVLHRDIKPENILIDTEGNLKLADFGWAAHVPNLENNDSEKSPNSSGKDSSARYMKRRRKTYCGTLDYLSPELCRKEWYGKEVDIWCLGVLCYEIATGSPPFSAEQYLNNGVTEREARSKQQVDIQNSDIDEKLASRRDMSPNLKDFLRRTLAKDPKSRLSTQAMLQHPFITKHHTNNEP*	-	-	-	-	-	-	-	-	-	-	-	-	-	1	YPRRVHGENSQYYCTKKFRFLTTPESTLKMKRKDLITAVGQLSAVHHVLKSVLDAYIEEEGLLLSQDLGDAVSNRSLGRINTGSKRLYITQVFQSENELMRKSDDILLRANELSSEEVAHTASCGCSDTPVPSHKFPSQEKHTAPHQMSWIAKPEVAATTRNDDVEEEDDLLKYLGQDDELPVAPTMALKPAGSPIPPQNTWGNAINSMSQNVVDPDLSNTQHSKSLTLKQQVFRDNLDRRMQEAHRKRMGQSNIAQKENSPVVNNVASNHATDNLVKSNNNNKTPSRSNAKTVKKMHRTLKKLPLKTMEESLLLSDDEEDNFASFQGAVEITKPPRTCVNWCKEKESWVRLSKQQRNIDPFSIFGSCPRPPIQFDEVFSFFDFKKVAFEQAEKNDPNC…	-
Ancora sagittata	SAR	Alveolata	Apicomplexa (sensu stricto)	Gregarinasina	Eugregarina	1	DPSKKKEEPRKQWSLDNFDIGKPLGKGKFGNVYLAREKKSKFILALKVLFKSQLQKANVEHQLRREIEIQSHLRHPHILRLYGFFYDDTRVYLILEYAPHGELYKKLQKAGRFNEQQAAAYIFQLADALIYCHEKKVIHRDIKPENLLLGLKGELKIADFGWSVHAPSSRRTTLCGTLDYLPPEMVEGKMHDSSVDLWSLGILCYELLVGKPPFESEGHSETYKRITRVDLKFPAYVSEGARDLISKLLRKDPAGRLPLMQVVLHPWVQSHCKTPPTPGSVMHSL	-	-	-	-	-	-	-	-	-	-	-	-	-	2	METMEMEPMEMETMEMETMEMETMEDGEDAPPPMMMDEEEEETAADSIEPTEATVEKEEDEEGAVEIRPENGEAEFNPDIEEDHDPNRLTFGEGQEQLNIEEQTHENMSNSDPVDTNTGTDDQELFVSPSAYHTEMNHDMQEESIADPIIEERENRSIMFSPIRASFGLGHEEDSTVMKDVQITEEPPMAENDYEGGNDENQENVPVEYDQKAQQKLVDDSVQKCAPEAESGTKSEPVSPEYTAPTVDPSVHIKTADNYSKPRTPKSFTRLAQKEGARTPIFNPQQLKDLVGAEKRQRLLEKMGEKDRAVEERLEQSRKRQLQSQEERRAMAEIKMRQAQERRQKLEQEEQRKRQEKLKLRRPLTPGPHASAISPRVPLTTGRSPIRTLKPPILQQDKS…	parallel duplication
Cephaloidophora Bamfield	SAR	Alveolata	Apicomplexa (sensu stricto)	Gregarinasina	Eugregarina	1	MASMEDEMKKEGFSFKDQPRWSLRDFDIGCKLGEGQFGKVYLARERRSKFIVALKNIKKNKLMMNAGVHLLRREIEIHSRLIHPNILEFYGWFCSDTGIWIVLEVCPAGELLEKIVNGGLRTPQNTVDERKVALCMRQMIDAIHHCHKTNTLHRDIKPENILIDSKGNLKLADFGWAAQVPTNLEPPADETSSNTASNLKNSKLDQKYIVRRRKTYCGTLDYLSPEICRKEWYGKEVDLWCLGVLCFEIATGGPPFPHEPYLTIGLNEREARMKQQEEIQKCDIELKLKHRKDMGPELKDFLSKTLAADPQRRLTTIQMLRHPFIKMFNPDISDDQLARMENEELALEKYL*	-	-	-	-	-	-	-	-	-	-	-	-	-	1	MICDTSSSPPIGTEEVPMPSRPDAIGLNQEGIYFCQESDEDEDGVMNNCPWLLDSLVRLKLTGCYSKALQVHHIHTEARCLADDFEQLINNPRSILTSKNIGGGSEVEFGSDSKWARWRRECRDGTAIEKATPKVEADPDVPSHVFDWLVCKSELLGNDFHEDLEDASPKHPWNALDILDVSPIRPSTSRNSIVPIPDILNHSNQHDSDEAMSEEPVGLRNHKDSMQRISVLSADFEAAKERRELKMQYQQRQAAVDQHHHVVSVHSDERPCHAPLIEHHHSQPASSHNDPCCVQETPQCRPEARTPVIATYHTKTPQLCRPPPVQRREHTSLKEIGPKNCQDSLVISDDEANMYANFDPVPSPSERPKVVQWAASRKDWEKQVREQSEYDPRTVFGFG…	-
Selenidium pygospionis	SAR	Alveolata	Apicomplexa (sensu stricto)	Gregarinasina	Archigregarines	1	MDTVKAERISTDTSHTSTTAPTSSTPVSKGGVPSRGESFEWQTPGSLVDPSEPSPTNHSATPTFSSTDKRVHPLSACSSTPAMCTPAPVPSEREKTVKERQLEDVAYTVDYHAPNWSLNDFDIGRKLGEGQFGSVYLVKERRVGYVVALKAMKKSQVLKAASELQLRREIEIQSHLRHPNILQFYGWFHTDTRIYLILEVAPQGELMDQLADGGLPEEIVSRYMKEMISAIRHCHRRNVLHRDLKPENILIDVNGHLKLADFGWAAHVPDPGNEEERPANGATGATPAILAQRESVEEGKPRNDGPGPQSGAGTGTVMAVSGISSAIGQSPQWAYMQQRRRTFCGTYDYLAPEICRREWYGKEVDVWCLGVLCFELATGGPPFAMDPYVESVRGEQYAR…	-	-	-	-	-	-	-	-	-	-	-	-	-	1	SQASDMVNKLGKDRNTLSTLTHLFANKPHVSEMESSEDSRVTTDKEKGVQHERVKAERLSRGDVDCGGNENSARRGNEEVNLAVTQRSPSSQGNRGEKKGIATPNRTTGGESVTKKTGKMGPPSLGKGGSSAKRGAATPPTGKKANRNKIHVPEGKRMHRELKKVGPKVYGIESIYLSEEEEEAKRALNPPRARAKWATSQAQTPWSETVKKQSDIDPNSIFGFGCLQPEFTKIFDSEVVFQAGTMSKREELRTANSVTLLAEKWNQDERRFGFRRSEGVKLSDLERLKSRIGQHRDVSNQVFDTKWTCCGAECDHNSAIRQPWFKKIEDLPSPSPYRGGAGGGATGMPPPLDVQPHNVITPIDLYHATTPNARQAVKSKDGAEQGGTQTSEMVPVEEG…	-
Cryptosporidium andersoni	SAR	Alveolata	Apicomplexa (sensu stricto)	Cryptosporidia	Cryptosporidia	1	MSEVCDNQNGSNQRLTSTRVIRRSSPFLRAPRMYSISDLALACPLHCPELSLSDFDIGRRLGSGQFGSVYLARERRTKYVVALKALRKKNLVRSGMEAQVRREIEIQAHLKHPNILQLYAWFEENSRIWLVIEIAPGGELYEKLCTEGPLRELQAACYMKMMIEAIQCCHKKHVIHRDIKPENILIGVDGQLKLADFGWSSHINNNRSRRRTFCGTYDYLPPEITRKQEYGPEVDIWSLGVLCYELVKGEPPFPSNQGHNVQYYLIQNKQPEYSSHWSPVLISFIHAALQKLPQNRISIDDMLKHPFITKYTTTSVPMQPKGSLSNNINMSNNDENLTISHNQA	-	-	-	-	-	-	-	-	-	-	-	-	-	1	MDPESTYFQRVESGFKKLLNSMDIAKMNSIKRLERITEKLAENIPLCIEKIRNNDGKFDYTIADIDLPNIIIEPNDEYMEHLLKECYMDIMCSEITGYIEDTKSTGTVAIDDTSCNDDTINIEKLLCNKAMELDKNNGNIQVGDYHFSPNAKPTKDEVGFVASMKRLWENKTPKVRNLWQDKKDSLINNDDKSLPNKLVKVDISPLYIGGNMSHIMGNTNNYFDVNIQDNDKEYMDDIEDNVEDDGKGFQSEKSSIVKSICSVSCDRDVTSPGYTNVLTTELSPAQSPPLLVMTPETPVPLVKSIPSTSQRTIQVLDSSAKTECKVNTIEDTNKSIESSNLVNEDSPLPPRPIRRLTNDQISSQEEKVIENMTSNLTENEARQSSQYAGCDVILRDKSI…	-
Cryptosporidium muris	SAR	Alveolata	Apicomplexa (sensu stricto)	Cryptosporidia	Cryptosporidia	1	MSEVCDNQNGSNQRLTSTRVIRRSSPFLRAPRMYSISDLALACPLHCPELSLSDFDIGRRLGSGQFGSVYLARERRTKYIVALKALRKKNLVRSGMEAQVRREIEIQAHLKHPNILQLYAWFEENSRIWLVIEIAPGGELYEKLCTEGPLRELQAACYMKMMIEAIQCCHKKHVIHRDIKPENILIGVDGQLKLADFGWSSHINNNRSRRRTFCGTYDYLPPEITRKQEYGPEVDIWSLGVLCYELVKGEPPFPSNQGHNVQYYLIQNKQPEYSSHWSPVLISFIHAALQKLPQNRISIDDMLKHPFITKYTTTSIPMQPKDSLSNNINMSNNDENLAISHNQA	-	-	-	-	-	-	-	-	-	-	-	-	-	1	MDPESTHFQRVESGFKKLLNSMEIAKVNSIKRLEKITEKLTENIPLCIEKIRNSDGKFDYTIADIDLPDIIIEPNDEYMEHLLKECYMDIICSGITGYIEDAKSTETVAIDDTSCNDETVNIEKLFCNKAMELEKNNGNIQVDDYHFSPNVKPTKDEVGFVASMKRLWENKTPKVRNLWQDKKDSLINNDDKTLPNKLVKVDISPLYIGGNMSNIMSNTNNYFDVNIQDNKDKEYMDDIEDNIEDDGRGFQSEQSSIVKSICSVSCDRDVTSPGYTNVLTTELSPAQSPPLLVMTPETPVPLVKSIPSTSQRTIQVLDSSAKTECKVNTIEDTNKSIESSNLVNEDSPLPPRPIRRLTNDQISSQEEKVIENMTGNLTENEARQSSQYAGCDIILRDKS…	-
Cryptosporidium hominis	SAR	Alveolata	Apicomplexa (sensu stricto)	Cryptosporidia	Cryptosporidia	1	MTINEEMNGSEKRMTTTRVIRRNSPYLRAPRMYSISDLALACPLHCPELSISDFDIGRKLGSGQFGSVYLARERRTKYIVGLKVLRKKNLVKSGMEVQVRREIEIQAHLKHENILQLYAWFEDKSRIWLVIEIAPGGELYEKLCTDGPLKEYQAARYMKMMIEAIQCCHRKHVIHRDIKPENILIGVDGQLKLADFGWSSHINNNKSRRRTFCGTYDYLPPEITRKQEYGPEVDIWSLGVLCYELVKGEPPFPSNQGHNVQYYLIQNKQPEYSPHWSPILVGFIHSALQKLPQNRITIADMLKHPFITKYTSGETLTQEISLTENPNKNLNVESYSNNDENVCKNSKINQQS	-	-	-	-	-	-	-	-	-	-	-	-	-	1	METENKVEVIDFEIEKGNDNGDTKEMEQLLALDDFKKLIGLLERAKESSLRRLDRTLLLIEENFEQVSKRLDQDDLSYLDYRMCDVDLPEMEVDPTEEEINNTVNCFLSKLIETGKIQLRQLKRELSEVKEVTENILVSEVNEEENKQIFESPKPKKVKDESGFVASMKRLWENKTPKLSSIWRRNEESKNLIVNRLGVSRLDKLDIVDGFLSKDDDTEKKDGVSLDIEMESIVEAEADVEVDPETEFGVETEIEGSGETEVDVDMEQNIETETEVMTSARNNTSFKSISNEDVISPKPPNAILSMGGSSPLQSPPLLVLTPSTPIPIVPTTISQQAQGGEARNSIAKVQVEETSARTEILRTSVVIGSGEIESHTTEGKERVSKSTTNANEDSPLPPR…	-
Cryptosporidium meleagridis	SAR	Alveolata	Apicomplexa (sensu stricto)	Cryptosporidia	Cryptosporidia	1	MSEHTKMTINEEINGSEKRMTTTRVIRRNSPYLRAPRMYSISDLALACPLHCPELSISDFDIGRKLGSGQFGSVYLARERRTKYIVGLKVLRKKNLVKSGMEVQVRREIEIQAHLKHENILQLYAWFEDKSRIWLVIEIAPGGELYEKLCTDGPLKEYQAARYMKMMIEAIQCCHRKHVIHRDIKPENILIGVDGQLKLADFGWSSHINNNKSRRRTFCGTYDYLPPEITRKQEYGPEVDIWSLGVLCYELVKGEPPFPSNQGHNVQYYLIQNKQPEYSPHWSPILVGFIHSALQKLPQNRITIADMLKHPFITKYTSGETLTQEISLAENPNKNLNIENYSNNDENVCKNSKINQQS	-	-	-	-	-	-	-	-	-	-	-	-	-	1	METENKAEVNDFEISGKGKDTVDHTKEVEPLLALGDFKKVIGLLEKAKESSIRRLDRTLLLIEENFEEVSKRLTQDDLSCLDYRMCDVDLPEMEVDPTEEEINNTVNCFLSKLVETGKIQLRQLKRELSEVKEVTENILVSEVNEEENKQIFDSPKPKKVKDESGFVASMKRLWENKTPKLSSIWRRNEESKNRIVNRLGVSKLDKLNIVDDFLSKKYDTEKKDGVSLDIEMESVVEAEADVDPETGFGVEIEIEGNGETEVEMEQNIETETEVMTSARNKTSFKSISNKDVISPKPPNAILSMGGSSPLQSPPLLVLTPSTPVPIVPTAISQQAQGGETRNSITKVQAGETSAGTGILRNSVDIGSGEIENHTIEGKERASKSTTNANEDSPLPPRPI…	-
Cryptosporidium parvum	SAR	Alveolata	Apicomplexa (sensu stricto)	Cryptosporidia	Cryptosporidia	1	MSEHTKMAINEEMNGSEKRMTTTRVIRRNSPYLRAPRMYSISDLALACPLHCPELSISDFDIGRKLGSGQFGSVYLARERRTKYIVGLKVLRKKNLVKSGMEVQVRREIEIQAHLKHENILQLYAWFEDKSRIWLVIEIAPGGELYEKLCTDGPLKEYQAARYMKMMIEAIQCCHRKHVIHRDIKPENILIGVDGQLKLADFGWSSHINNNKSRRRTFCGTYDYLPPEITRKQEYGPEVDIWSLGVLCYELVKGEPPFPSNQGHNVQYYLIQNKQPEYSPHWSPILVGFIHSALQKLPQNRITIADMLKHPFITKYTSGETLTQEISLTENPNKNLNVESYSNNDENVCKNSKIN	-	-	-	-	-	-	-	-	-	-	-	-	-	1	METENKVEVIDFEIGEKGKDNADTKEMEQLLALDDFKKVIGLLERAKESSLRRLDRTLLLIEENFEQVSKRFDQDDLSCLDYRMCDVDLPEMEVDPTEEEINNTVNCFLSKLVETGKIQLRQLKRELSEVKEVTESILVSEVNEEENKQIFESPKPKKVKDESGFVASMKRLWENKTPKLSSIWRRNEESKNLIVNKLGVSRLDKLDIVDGFLFKDDDTEKKDGVSLDIEMESIVEAEADVEVDPETEFGVETEIEGTGEAEADMEQNIETETEVMTSARNNTSFKSISNEDVISPKPPNAILSMGGSSPLQSPPLLVLTPSTPIPIVPTTISHQAQGGEARNSIAKVQVGETSAGTEILRTSVVIGSGEIESHTIEGKERVSKSTTNANEDSPLPPRP…	-
Colpodella angusta/sp	SAR	Alveolata	Apicomonada	Chrompodellida	Chrompodellida	1	MRTSLKISEDKCFDVTSPSASPDYAKRDPSQLYEWSLDDFDIGKTLGRGQHGKVFLARERRSGYLVAIKRMKKMSIIRSNMDRQIMTEIEIQSHFRHPNVLRVFCHFTDVENIYIVLELAGYGEVYYMVCREGRFEEEKAAGFVGQVCCGLSALHAKKVIHRDIKPENLLIGHDCTLKLADFGWSTRALSGRRKTLCGTKDYIAPEMAAKKVYNEKIDVWMVGILTFEFVHGNPPFCEDDLAKQCEVIQRGQYTINEELSEHCKDFISKCLTMEHEKRPTIDEMLDHIWLKKHRHLNNPYIGSYYSAILKDAEAAAEIEEKAKELRMQREQFEESQAQMEAATKENEQCTTSDNPNDQTNSESSSTVKRPFDKTGLSSAIKAKRPSIPCDVPPRIHESE…	-	-	-	-	-	-	-	-	-	-	-	-	-	1	NAEYMGRRALEAMDSSVKASDVYQYLMQNHCQRVAFEFKTLVENNSFPPPRVNSQDRTPRNSVARESIRRQEIFTEPRGRRIKALGPKNPLDNICLSDNEDNGESNPSISAVWAKTANWTVAWLGQKHINPDSIFGCGIRSVSSEHLFANARVAPERLKRVLDRGQRGSSAKWEGSHKLRRVDIDSYAKMNNQFLNVHKKVWYSPLNSNNADPPPPPENKHQLGNSLLQSAQKHRLVSKVNNQNNCSTVEANNFQKNLVNHPKGYEVKNIVPVVEGPGEDEDDSIDVMRHSQSTTSIKSLTQKYHNSTKNTHPETPPPSLQHVEYSKDARFVSPGVLGASKDAQSSSGLINGMLTKSLITDIEMLVSDEE*;	-
Colpoda aspera	SAR	Alveolata	Apicomonada	Chrompodellida	Chrompodellida	2	MNLSRRSLLTLSTASTSKGSSFQNAPAEWKLADFEVGEFLGKGKFGVVYKATHIRTSQPVALKIITKDVVRKHKMVKQLRRELEIHSKLKHPHIMLMYGFFVDKNYIYVVLEYVPNGNLYTKLCNEKQLSEELVAKYIFQILSAIGYSQARKVSHRDLKLENVLIDQNGDLKIGDFGWSVHNMTNARTTICGTIDYLAPELVNEQEYDETVDIWCLGIIMFEMLYGYPPFYSKIKEETMEKIKAAQLVFKDSDRVISPEAKDLLSKMLQVEPEKRIKVEGAIPHEFFTKNLGAWHEELVKTRK*;GRGKFGHVYLAREKQSHFIVALKILSKKQLIKSGVEHQLRREVEIQSHLRHPNILRMYGFFWDLKKIYLILEYAPGGELYKDLQSQPGKRYDEP…	-	-	-	-	-	-	-	-	-	-	-	-	-	1	LQILHQQIPQFLENPIVSKDNVIPQEAPLQASQEYNFNQAFEDLLFNSLNTLKLSKPQPAPQTQIFPTQNVPQKEQIQPIQPVQTVQPQLPANQTKPVLFSKPMNFIDADSDFDDYENGHRDADRRSSLFYSFEEDDKENFHLNLEEKLQYVLTDYSDNSSSNENSYVYHEEEEEIIEEPKKKPPKMFDLFDKVHLNLQEATSNNSHMNHPPPPKNGKENKQQNANGPKAGMFSNLASQANSLQNSQTGAMFADLLNSWKPKGNEDFKPDVDLTKEKRRSKKQSPVRTKTKRLFCNDKKIPLWATDMKEVEKISKEQKKRFNCALIFGMFNVDNLDLVEVFQRRDPRLLKPRGSSANWKNEPQTPSTSKQVNEKSQRSINLTKTKKNIDFQNYL*;	-
Chromera veila	SAR	Alveolata	Apicomonada	Chrompodellida	Chrompodellida	1	MAGLSPGLCLQQAEDFWQLDFEVFYSRGGNVCGRPFGPVPSSGGRVHIVRRGENNNEDEGQNGEKQEEGQKKAFDSDNGKFKMTFRVHKEPQVHLRRLMSYSPDEDTYRLFIFVCEDAGEEFKDPNSDLYKFLTAVQTYAPPKHVQHPRPAPPPKFHAVVWVCRPNGFKAEAVVGDDHLLAVYRHGRNHIRHECHSHSNFAVMIEAYSNAPQEEATYLLTKYCKDFRYRIQEEEFETDGLTDDVPDLWALSLRRAREAWHVANEKPSAAEVTKKETAASASGSKEVAEGEKENAGHHQKDENPHPLAATKKRGWRVLQEVFVDPSTAAAAAAAAGVDKNKKADDSKAGGRSKESKAKPKEISKMKFNVPPPLPEETAAATSGTAFVGHVEAPLPRKKLV…	-	-	-	-	-	-	-	-	-	-	-	-	-	1	MDRRAISPKTRAAIAEGLRAYHKDDAQLQTQLRDQALSKMRDLYAKHKDDNVRPQMPVEPATFEEGMTFLMSKFKPQPHCLLKEIFGDHSLPKGAGKENSRPLTNANGQRDKDQTRGGGPLQPQKGGGAGGANEPLKGKRQRPISPHPTTEAKPQEADAAAKPKRARNAPAAVAATGAAAAAAAPKKERDQKLKAQEGKETGGQKPQGAQKKYADLQRLKRLQNLQVKQMEAKQRGGGADRAPKDPGPAAPAETATATAAGGRKVLKPNSKEKKSKGAAPPKREQKEKEKPKRPVLVMPKAKANVQIPTRLGIPTKGQQKTKLVREKTQPAGNAPAALPESNLPRLGGGAGKRKEVEKGKEGEKENGDTEKEQRVGGGRQAKAAAIERIKNNAESSRRG…	-
Piridium sociabile	SAR	Alveolata	Apicomonada	Chrompodellida	Chrompodellida	-	-	-	-	-	-	-	-	-	-	-	-	-	-	-	1	CRQQLRIDLDKIFGEAVPEVNLRKIFASGWKEDEEHDKAEVIASPGNGPNQWVGADKLTRDEIEAYREMTGHTDDLSRLVWMPAPSTTTPFSSRPVSFDPKAGAAAASASSNRSIRQPSATARDKTPLRSKSPR*;	-
Vitrella brassicaformis	SAR	Alveolata	Apicomonada	Chrompodellida	Chrompodellida	1	MLPPLAPRQKASLSPSSVGTQESNTTDVVDAASPASSKPPLPTRQQQKKPPSASRPPLPATAKQGESASPSTSAPSAAAAEAAVVPRQPRISALPTRVPLCKALGGARLSNAPPQRKPRRSASQPPAEPSISTSQPAGGDVRAADVRRKDVIPRPTRRPTLAPRSATPGPFSQRTVAVKEPRQNQVVRKKRDASVGPKVRPSAVRSPSVPPERVEEGPKRRGREAGDGGAGEKGGDSGVFSLSAFEMGRPLGKGRFGCVYLARHRPTGQMVALKVMHRSMVLGESFVHQIRREVEIQARLRHPHVLRLHGFFRDQQRLYLVLEYAAKGPLFNKLKQQGRLSEAETAKYAAQLALGLQFLHSRGILHRDLKPENLLITEDDTLKIADFGWAVLAPREKRR…	-	-	-	-	-	-	-	-	-	-	-	-	-	1	MGRAQGDAERILVVLGQLRGLAQTVGDDATAAVQRKGRIGREKAEECWERVLAAGKDVHQMAKAVDAFEKSMALGLMGKPLPSDKSLLIAEETRRPVMVSSSRGGARNKRAADGDVADHDVAEMAVRKHNKKGSDKGGTSGSSMACDEPADVHMSPTDGGGVLDEYPPVGAVAHLREVWEKRDHQYCKPPSVHDLRLQGKLSPAAVEKKLSSVPLPLCPSGPHTPHFGRYPHPPHSRKASQQQQQQQQHGHDAQGGGGVGGDGMDGHVILRGMKQLGQQEGVSPDGDAKALLFRVGRGDMYQFNGRVTPSAPQRVRVPQLQLGMNGGAVKGLGQLIGVSRQCVRAEEDMYDEVVVHDDEDEIYARPYDSEILDLDQQHDNNTNNNKASDAPCFSPRVMD…	-
Platyproteum vivax	SAR	Alveolata	Apicomonada	Squirmida	Squirmida	2	MVHKKSLCALQEDCELNNENQPPLAMRFPPHAKVDDLAGEFPVLDWKRSDFDIGCPLGNGRFGSVYLARERRTNFLVALKAVYKSQLIKSGVWLKFHREIEIQAHLRHPNILRLFGWFEEGERLFLVLEYCAEGELYNFLNKQKRFSEGRTAFYMEQLMCALEYCHSKNIMHRDLKPENILIGENHCLKLADFGWSVHSTDRRQTLCGTMDYLAPEVVKKDAHGVYVDLWACGIMCYELLCGAPPFEEKTPKLTYNRIQQVDFQFPEHVSSDAKDFIKRMCCRDAKQRMPLSEALEHPFIVKNVKLWLDDKRKTGSKLAKVRPIRCNYMFGHKKHITPKKSTKCCC;MEMKPFNTLYPSMDMYCESLEANSKSCDDLTKARKLEDQVEQREWRLADFDI…	-	-	-	-	-	-	-	-	-	-	-	-	-	2	LVSTQSTWGWSKPEQVNQAFKAQQQINPDSIFGVSVGKPDLSAMFPPGEYPHIHEVLARNTRRDSLNWSRDKLTKAEIADYEERMNYHHRVEHLVYEYVHATAPPTPLLGGA;CMGGNKGHLVPHEPAEARGASLGPRESDGWYSLAGRIDEDNEATSTIPSQFENKPATQQVVIQPVDNSKALPSSQSILLTKVPSAKEIVPEIIAPSKTPIANKVVCLNVANVQNTPVSTPVGIQYSTPANVTIGNQKTPYYGWSTCKSGPSTPTSTPGKNFFVHNRKNLKAIAPPAAEDQWQMSDEEDANHDEEDPDNMRRRRRNKKIPAWCRDRAAIINLWHQQRDIDPDTIFGIRVRSVVVDEV	parallel duplication
Digyalum oweni	SAR	Alveolata	Apicomonada	Squirmida	Squirmida	1	MTGRVDLKEKEITAASECALPHDFAEQYMQHAMNEKVDFAFDLPVTEWTRDDFDIGIPLGNGRFGTVYLARERRTGFYAALKTIYKKQLVQNGVWLKFHREIEIQIHLRHPNILRLYGWFEDKRRIYLVLEYCPDGELYHFLNKQKCLSEGRTAFYLEQLMCALEYCHSKNVMHRDLKPENLLIGENHRIKLADFGWSVHSRERRMTLCGTMDYLAPEVIKKDAHSEYVDLWACGIMCYELLCGAPPFEERSPQNTYARIQKVDFKFPKHVSDAAMDFITRMCNPVASKRMSLSDALDHPFIVNNLKKWLSEKNHRHHAEVRPIRLSKIPNSVENVPPIIEEEDEGDSSPEDDGQQPEFPKVLNGKALIKSDTDAQHPLDRHQTILESHNQQSSGVRQS…	-	-	-	-	-	-	-	-	-	-	-	-	-	2	MTEAAVIEVLCRRFLDHASSCRDDAKKSLQDLDHRSNQLRNEIARKCPENPMLDTSLMPKCIPQKQGKQWGWNEFINQVSESYKKANPEFVVNPETVSSRVFNESSQENEQKVVKNALQKDAKAKTKPKVTDNKIKKPISVTKASPKHGLAKLSRTDTPVGGGGRNGGTSVKNRQGLPPKGGTVGKPESDAHETSFGKSNGEVKDFCSPHFAAATASISEDSSIAAETEVSSPDNKKEIPPTFGSWSSSLLEEAKNQQTPYLQCASPDDVPTTPSPQLILQNPAMQGQEGMKNLSPMLCQIFVENGAATPGGSHQTTMAAWRESDTSGKLTNTTEPTRTPFISSVNMHHKHLNWTPVTPAGVPHLTRSKIELTSVNDEDQYEMSDEEDMDLSDREADEK…	parallel duplication
Perkinsus marinus	SAR	Alveolata	Perkinsidae	-		2	MVLSPTLIRGIDAQPLDAALHGITLDDLVKVTIGHGGGLSGHTTLSDSDDSPPRPVLARNTSLRDIRKDEKKLGKGSFGEVLCVKIRGDPSGSYTGRLYALKTLRKRDVEQGHLAAQVEREISVQSRLPAHSNILRLYSHFEDREHVYLLLEYCAKGELYHLLRTQQKRRFPVERAARYFLMAARAVAHLHSHGIMHRDIKPENLLVAADDTLKLADFGWCAEFPSTVVSGYTTRSHARRHTFCGTLDYLSPEMLLGRGHDHSIDLWGLGILLYELLAGRPPFNATDQRTVVSNIINVNLSFPIDFPLVAEDLVRRLLVRDEGRRSSIAEVLSHPLCTSIGAPQPPLPQPVLRLSSTQQVTRRHKSPPRPRQRDQGVPSGLARVPTLRVASLLQGRLVC…	-	-	-	-	-	-	-	-	-	-	-	-	-	2	MASKHLSNVLEAAGEWFELQVLAAETEFSAIGKASMEFRVAVAKLKTFEEQALQLIAGTPLPEMPTLKEEAIMKQVMKMDKAAVALDEMKAPQIPKTAPNLQSAVPRSGVGKAPARVIAPPSQPEGVTKPPKVVPKSKAAVVKDAVVEEVTVDDDSEDDDVGAAADISEAVVDITAREEATPPHPAGGIVNQLKNRFMLNKKEQAAPKTPSAEDLRQIPSQASNPFKAGDKWKGPAGFRTPRFVAPPPMREEDTVVCEPGPSVNEAAMQIDDAEEADDETEESEHERSILKTCYESNGESSVAASSDGSLLLAFDSLPGYPSGKNGPTEDDVKFVDALESFGSIKKNTNNPPTPVKACTLTLNTTPVVIGRRSCAPQRQELKPLPALDSNDQYDVSEKD…	parallel duplication
Symbiodinium sp	SAR	Alveolata	Dinophyceae	-		7	MARPLAGDYGCSNPRCTRIHADQVLLECRCGAGFCTEACWIQEWHAGHQDRCPCADELLAAARAQQSRRRGAALLATLALSRRVPDKDAEGTKAQPVAKRNESSKSHFASSKASSWISLAEAESLPDPDKGHRPFGCCVDDFHILEQLGEGSCGTVAKVAHVLTGEVFALKAIARQRVKEHQLQKYVEREVATQQRLNHPNIVRLYEYFEDVERVYLLLEFAPEGTLYAKIHQQGCLAHAEAASIFADVTRAVMHLHRHGIIHRDLKPENVLLFEDGRAKLADFGWCAESTDDGRKTFCGTMDYLSPEMVTRKPHDHCVDTWALGVLLYEMLTGMPPFAGRSTADCVERILSVSLSVPVSVPAGAADLIRSLLKAEAEERLTLTAVLHWPWLEDMLTDP…	-	-	-	-	-	-	-	-	-	-	-	-	-	7	DSISPSSRAQSARLWRQIRAQPLPPRDPEENYEMSSQGEFLDMDEDLHRDMRLLEEVEVELHLEQLRAAKRSPRWCENYKEVVRSQADWNPDDVFGVRAPEVNLDQILPDKLYLAQKLHRSYKKRRGIEPKSSGKWEKDRCKDDDVTQYRSKMGHSKAWLLDVEALSAAARARQEGAMFPESGSSNEYLAAGEGGMQDNVVRHEPESGDEQPEGAELEPESGSWSEQRAVPEGLQDAEQNPSDHAPESASEPTEGGVRQSERRPSNPELPVWEGGTTDLERCRSNPAATGAECLTAAAVAADLPPGPSASSGSAWGPFRNRRSPRSATSEEFYSPERQHQVGHVFWSSFRRNLPGCCAMQSWGGGDDIELVQSYRPHDTGIARIAVERCHRRLVLSASA…	parallel duplication
Tetrahymena thermophila	SAR	Alveolata	Ciliophora	-		17	MDFAKYFFNTSNTSFFKSSNSNEANNSKIQQNISNKNSDSELSVQSKQIKSNSKDLQQSTGKFNETAFFNNQSTNSSQNIFSSQYKANINKQGQQNALNNMQVGPFQIGNNTNGSIQKANQQQELIFDIKENKTFFPFLSCLKQKKEISDKENDDPNNNENKNKSPLINQQAQQNIKKSPPYHNIYKGTQDRIFNPYEWSIQDFEIGRPLGSGKFGHVYLARERKTKFIVAIKVLSKKQLIDNNAEIQFRREIEIQSHLKHENILQMYGFFWDDKKIYLILEYASGGELYKELKSQPLRRFDEVTAAKYIKQVASALKYLHSKHVIHRDIKPENLLNCDGTIKISDFGWSAHAPSNKRNTLCGTLDYLPPEMVEHQSHGSHADLWCLGILTYEFCVGSP…	many orthologs - possibly also polo kinases in this list	-	-	-	-	-	-	1	MAATTQDYGLIENAILNNIQIIKNDFMLLHQRQKGMINQLENDFLQAIPEKIKNMSVADFLYKFDGDLNKAFCQLSVVDLNLSQTLSNASTLPLQNNTNFVSNNNKLIYSQVQSSSFMENFPKSNNYNPINSSNSKSILKNSKRKRNEYEQNQKKLLNNLYQTHQNNYSNNKENFSQNGTSQMHFQQQSKQNTAKKNNNTNNNNQNQNTTSKSGKKIWKF	-	-	-	-	1	MVSIQQKDIFLKKSGLIRIDQLLGMKDKNHLCLVQAEDDVILFEIWDMYAERIIEQKKINLYNYELSSNVITLESNQLAFYGVIQETGVQCLFLVDVFASSDKKKKEIETQKIKNQQLIQMMIEEQQLDELDENNQLYKINLDNPESDILYRKDTAVSLNPQIKNKGVELANDCNHYKQTNFKNQNKEDFDANILDVDEDGNVELNEKLQQNDIEKKNYNQNGQMFKQANKKQQLNSFDESNIQSLPVIEDRNLPLFIEQLENKQDMSLMNSFITQDFQGISGINDLIEDINCINNFEYINFNRNEMLNYKEFLPSQQAKNEIQQPLDTVKEANDLSIRDNFSLTNSNIKNHQIDKYAPDYDASKLSSDKYQTEQDRSSSNNNKNNNNNNLNIRDTLLQ…	-
Stentor coeruleus	SAR	Alveolata	Ciliophora	-		51	MNCNNLSCSNKAIEITACTKCFLRAYCSESCRKDDWVSFHKTECQAHCFTFSDFIPVPEKKFLGKGSYGHVQLVRHKSTGELYALKDIKKVTKTRQAPIKMLYREISVQKKLIHENIIRLYDSLETPDQVTLVLEYADAGNLYYYLKKKIRLTERKGCFFFTQLCNAVKYLHDLNIIHRDLKPDNILLTKADCVKVCDFGWCVEGIEERTTYCGTLDYMAPEILKGGQYTNKIDIWSLGIILYELLQGQTPFNGRNQVEKLKSISCQKLEFKTSVSQAAKALLKKLLAYHAEDRPSIDEVLENEWILRYKSFHTTEDSLKSSCSTGRLGFEAQNDDDFDFKLSKNYPPSYTRLTGVSNIHANKFSAVTSANILSLREDTNSNKSSYAEENEEKIMCSVI…	many orthologs - possibly also polo kinases in this list	-	-	-	-	-	-	1	MSQIANLSKIEKSVCESSRSRVNLSMEDDIFTNYLEPQGNDIFDTRRFNLKKRNSQILNTATPKVQRRSNPGCKKISISTRANSVKLISKCLYRICPSTQGSEGRLLKRVENLEKKEELWKERASVWEKERKNYKKAIDNVSTIKISGDPTSYYKNQLEIWKNSKFLNKISESTKINPMQEVKNLFDWMNSQPESTPFKSIKLSFPTIAAKLEELGNYVSSLHFHSENSEISVALKDLSEKNNQLAESLQEIEHELKSKIQALHQLQEDIVDLRARLKNKDIEITEXILKLQK	-	-	-	-	1	MNLGELLELTEIHKDMNALIKCDFRDIQKSFAILQERYMRICQYKHDTPTKSIPITRTPSTNFSTPKTTPKRKLKLTPQKSSKSSRKSSNNSEIDPENIFGRPLKVNLHDIFQDYVSSSDEGKLSFN;	-
Arabidopsis thaliana	Archaeplastida	Viridiplantae	Streptophyta	Embryophyta	Magnoliaphyta	3	MSKKSTESDAGNTEKQWSLADFEIGRPLGKGKFGRVYLAREAKSKYIVALKVIFKEQIEKYKIHHQLRREMEIQTSLRHPNILRLFGWFHDNERIFLILEYAHGGELYGVLKQNGHLTEQQAATYIASLSQALAYCHGKCVIHRDIKPENLLLDHEGRLKIADFGWSVQSSNKRKTMCGTLDYLAPEMVENRDHDYAVDNWTLGILCYEFLYGNPPFEAESQKDTFKRILKIDLSFPLTPNVSEEAKNLISQLLVKDPSKRLSIEKIMQHPWIVKNADPKGVCASIDI;MGISTETQQIAASEAAQKRWTTSDFDIGKPLGRGKFGHVYLAREKRSDHIVALKVLFKAQLQQSQVEHQLRREVEIQSHLRHPNILRLYGYFYDQKRVYLILEYAVRGEL…	AUR1;2;3	-	-	-	-	-	-	1	MPKRKAKECVKLTEEDRNDEKRIRIEEKKEDFVDEEVERQIAAIRAIRDVEIEQMLTALRLLRSYFTEEQLHTPVLDFFKENLPDLSISRNEETGEIELKWRDENGDSFAGNENGVDMNYSILKRLSMRFTDLYMKANLLGTDNPQLDNLVFQGTSENQMLPGHDAFQTPGVNGQRLSFGMTPKTLRLPKAGEMMLSVHGSPLGVYKEDHNMGAINEENS	BORR	2	MVPPLLKLDFTQGPRAGDSLGFKPGSTIRIGRIVRGNEIAIKDAGISTKHLRIVSDSENWIIHDLGSSNGTILNSDTIDSDTPVNLSHGDEIKLGEYTSILVNFGSDVVQAPQEHKLPPRPRRNNKRLAASDPDPDPIESVQEKPKRTRGSSKQEENELPKSTRASRKKNLDDIADKEEELDVEIEKVVKARVGRPRKNAGSAIAKEEEVVEEKKRVGRPRKNASSAITEEEEVVEEKKGNSRARRGKNSEIVQKSIKLEVEDTPKAVEISEVKSRKRVTRSKQIENECFGLEVKDEKRTTRSTRSKTTEIGGESFLELEMVLNQARKSRAKRKKMDEEPSKETRNDDAGEEVLKNCHVEEDKENEAQEGCSGRSDDICDQEDEKECDGSKRVEQVEIE…	BORI1;BORI2	1	MIRDSENKTTTAKVLKDREKRHRMKKSRSSAMFSVKENPRGKTANVKIENLFVQIFERKRRIVEQVQQQVDLYDQHLASKCLLAGVSPPSWLWSPSLPSQTSELNKEEIISELLFPSSRPSIVCPSSRPFSYQRPVRFLADNVVRQDLTSVVNNPLEEQLLEEEPQHNLSHNLVRQVSNHSHEQDVNIASPRDVHEKERLPESVSIDCRENQSCSSPEHSKNQRVETNLDATSPGCSQGEKVPKCVSTTGCKRKSSSLGYCQEEIEPDTCIDPGLSLAKMQRSRSRQKALELRSSAKASKSRSNSRNELKPSPGGDIGFGIASLRSDSVSEIKLFKHDENDEECREEVENSNSQGKRGDQCIKISVPTESFTLHHEVDSVSISSSGDAYASIVPECLLE…	WYRD1
Trypanosoma brucei	Discoba	Euglenozoa	Kinetoplastea	Trypanosomatida		3	MVIWFSAGDGVGFPTPTPWEIQPPRGLTSADGCRGGLRDGGEPAVISRQQRQQKPSRHQQQHHCVRQPKPKVVIQQSDLRDEQFQRLSVLGEGSYSVVVAARHLPSRQVVALKELSRQRLRDAKLETQLQWEINLHRTLRHPNIVRLLSYYITPRSVVLVLELCRGGSLLRRLQATAERRFDEGRATRYIRHVAQALAYLHEHGIVHRDLKPGNILVDARGVARLADFGWSKGLAGSAAAAVITNGYDASEVAPRCAAGETDACSETEDGHGRLTVCGTLDYMPPELLGGTPCSYKADMWSLGALLVEILSGQPPFYRTSQQETLQAIQDEGPQLDVDGSVLSPLARDLALQLLQKDPNVRPTAAEVLQHPWLRGKRPRV;MSTRLCEPSLRDDGAQRG…	AUK1;2;3	-	-	-	-	-	-	-	-	-	-	-	-	1	MSNPWNAKLVEELLFRQYEKGEDVSMLLPPPPALSVDQYLKEYEQSTKVLFAYVRNGPANALTPQNINNPRMYGGTPTKGSSSMQRTGNQGGATCATTSSSSACGVDSKAQMQRHPRGLDGSQSAAPSLPLTAGDAAAGQGSMAPPEHIRKRIEWPATVPTNSALKSNSRSRVANLTTKRVAAQERVDPDLIFMQNPEELPLHTIFAKYPKAVESIAALRGGSGDWREDTFTEEEEILYKRELRYSHMGPSQCGFFRSNLIQR;	CPC1
Giardia intestinales	Metamonada	Fornicata	Diplomonadida	-		1	MPQHLVPHTGTGKRTTIEDFEIGRFLGRGKYGLVYLAREQSSKLVVALKVLYKSYIKSERVEGQVRRELDIHLNVRHINIIRLYTWFQDETRVFLVLEVAPYGELYQRLQQFGKFPLPVVSKIIRDVAQAIQYLHRKNIFHRDLKAENILICKGKETKEHTDAHNSDDSISVHEHELVRMAHYTYKIADFGWSVHHPTHGGRRRTQCGTLDYLPPEVMLGQSYDKACDIWSLGALCYELICGTAPFYHDEIKITRQNIANVEYSFTKDFSPASKDFIQRMLIRSPEARISIEDILRHPFLRQTDHRSKVPK	Aurora kinase	-	-	-	-	-	-	-	-	-	-	-	-	1	MTLNLSFPLYRIYDHYRDAHYAFGEEITSIFAGLEPAIKAFGVELDQYKLSDPINMAPFPEVLHAVATTSSSRFSSVFKRLDDLSLIKEMISEIRAASKSRESRMQHTIQVQRDVSVALHKTPAGSVSEPDLKKALGQKPNQIPDNLEEIVRQKQVELEKEMRARVEVMVEKEKELQERVEQMDAEIKRLERQNAELDQKMKKEIDEERSLREKEANLATEYEKKIKSLANELAELHQQKSTYEQNFAIKKAECEDELHSIQQALLKVKTELAQVSAAKTTTQTELESVGKKRQQNAEDIVNLASQLSEAGPLIDRNIKIFEYVMDSGEEMISSAIHRLMKTGSRVESTEFEGTREFTMPLTENLRGIGENKDSTHSERCLLLDKLKQSDQDSAQQQQQ…	-
Dictyostelium discoideum	Amoebozoa	Evosea	Eumycetozoa	Dictyostelida		1	MSYPNNKENSNNIGGGSFSVPSKQPQRVLQQQNTNINNHQTTSTVKSTITKPTTTGATTSTNTSTIPPTTTASSSSSSSSSSSSSSSSSSSSSSSSSQSVPKKKWCIDDFDIGKLLGMGRFGHVYLAREKKSQFIVALKVLFKNQLQTHNIEHQLRREIEIQSHLRHPNILRLFGYFYDDKRVFLIIEFAKGGECFKELQKVGSFNEQTAATYTLQIADALRYCHSKHVIHRDIKPENLLIGVGGEIKIADFGWSVHAPNTKRSTFCGTLEYLPPEVIEKKGYDQTADVWSLGILIFEFLVGRSPFTSDEEKNIFHNIQENDVYYPSSISPEAKDLISRLLVSDPHQRITLKDVINHPWIKKHAHPKSLEPTKLGLPLPSQMTY	AUK1	-	-	-	-	-	-	1	MSNNESYEILKFGLEHFDKEGKNNNHNNNNNNNNNNNTFNIFETHIESLRNESKMLSELLKKNLQSELLNLPNSIRKMSMEEFLQHCLDIDAINVTSVPTLINNKDNNSETEQQQQQQQNGNNGLSLTELLFSPEKSVNEIDNSNSNTSIDSESMNNIKQKVIDILNSPQLILKKKGFNSNNNL	-	1	MDKKDQLYKQMSMDSNSGLNFEQLKKLKVEEYIEFQYNRQIELLNKYTENKIQEIVNHKEKLKRELIEQQRNQEN	-	1	MDSIKKNTINRINGLPINHNNLSKTSIISMDDDYNSNSSFYSTNNSILNSVTKNSNYLNNNNNNNNNNNNNNNISISNCNNNNTNNKINEQLKTFNNIFEEKGEFLKEEIDNKFNDIISLMNQSKNQLFLSLNDIDSLYDLSPLSTTSTITLENNNNNNNNLIKFKLFNNDSIKKYILPVSSKTIKFKQRQILIEQQEFNEKHNQQKHLLELQRQQVLSDQQNQFQEQHKQQLSLKQQELEAIQQDTNKVKQQLIETHDKLLIEKEKQFKQDLNSLELNLQNKFTNEYQSKEQEFNKKLEQQQQQLEKQFQQTKELLIVQETLTLKSKLTTEFQEQLKTHQDQINKQELLLKQQEYQLFLKQQEISSIQKQHQDDLSSLKSKLSSDQDQIKKQLLQQES…	Icp-A
Saccharomyces cerevisiae	Opisthokonta	Fungi	Ascomycete	-		1	MQRNSLVNIKLNANSPSKKTTTRPNTSRINKPWRISHSPQQRNPNSKIPSPVREKLNRLPVNNKKFLDMESSKIPSPIRKATSSKMIHENKKLPKFKSLSLDDFELGKKLGKGKFGKVYCVRHRSTGYICALKVMEKEEIIKYNLQKQFRREVEIQTSLNHPNLTKSYGYFHDEKRVYLLMEYLVNGEMYKLLRLHGPFNDILASDYIYQIANALDYMHKKNIIHRDIKPENILIGFNNVIKLTDFGWSIINPPENRRKTVCGTIDYLSPEMVESREYDHTIDAWALGVLAFELLTGAPPFEEEMKDTTYKRIAALDIKMPSNISQDAQDLILKLLKYDPKDRMRLGDVKMHPWILRNKPFWENKRL	IPL1	-	-	-	-	-	-	1	MIPALTPEERQKLRSAILHRMQLELETTEKLIENIKEETLKKLNLLQQPDATSAPQSKELIREVLEQEGRRIE	-	1	MDGQIDKMEKRYSMTKLENRLRTFQDGVALEKKKLKWSFKVIPYQAMAKLGFYFDPVIDPKTSKLKKDSVRCCYCHRQTYNVRDCRSKRKDVLETLSNIMRQHLTVTDNKQVCLLIYLRNKLLTDYSFHMGVSDWKNDKYFSNPDDENVINLRKFTFQDNWPHSGSQNEHPLGIEKMVNAGLMRYDSSIEGLGDPSMDKTLMNDTCYCIYCKQLLQGWSINDDPMSRHYKVSQNGNCYFFQTRNRFERIKNDNDSITKNCEVSPTLGENGKREVINTKTASQRQCPLFESPPSSTGPQLDDYNEKTDISVIQHNISVLDGAQGENVKRNSVEEKEQINMENGSTTLEEGNINRDVLADKKEVISTPTAKEIKRPNVQLTQSSSPIKKKRKFKRISPRKI…	-	1	MDWAIKAARKKTQRKPGSTRSIIETLDDLNNLTTDAHSEINQRLYESSEWLRNNVYMNTLKYEDKKMEESLISPENTHNKMDVEFPKMKGEYELSNSQNDAAKDVTKTPRNGLHNDKSITPKSLRRKEVTEGMNRFSIHDTNKSPVEPLNSVKVDANESEKSSPWSPYKVEKVLRESSKTSESPINTKRFDNQTWAAKEEMENEPILQALKKAESVKVKPPPNSGIARSQRRSNMFVPLPNKDPLIIQHIPPTKSSGSIPKVRTVKESPIAFKKKSTINSPAIRAVENSDTAGSTKASSVFDRLSSIPTKSFENKISRGNVGHKYSSSSIDLTGSPMKKVSQKFKSINSTDTDMQEALRDIFSVKNKITKNNSPKGKNSRKSSIPRFDKTSLKLTTHKK…	-
Homo sapiens	Opisthokonta	Metazoa	Bilateria	Chordata	Vertebrata	3	MSSPRAVVQLGKAQPAGEELATANQTAQQPSSPAMRRLTVDDFEIGRPLGKGKFGNVYLARLKESHFIVALKVLFKSQIEKEGLEHQLRREIEIQAHLQHPNILRLYNYFHDARRVYLILEYAPRGELYKELQKSEKLDEQRTATIIEELADALTYCHDKKVIHRDIKPENLLLGFRGEVKIADFGWSVHTPSLRRKTMCGTLDYLPPEMIEGRTYDEKVDLWCIGVLCYELLVGYPPFESASHSETYRRILKVDVRFPLSMPLGARDLISRLLRYQPLERLPLAQILKHPWVQAHSRRVLPPCAQMAS;MDRSKENCISGPVKATAPVGGPKRVLVTQQFPCQNPLPVNSGQAQRVLCPSNSSQRIPLQAQKLVSSHKPVQNQKQKQLQATSVPHPVS…	AURKA;B;C	-	-	-	-	-	-	1	MAPRKGSSRVAKTNSLRRRKLASFLKDFDREVEIRIKQIESDRQNLLKEVDNLYNIEILRLPKALREMNWLDYFALGGNKQALEEAATADLDITEINKLTAEAIQTPLKSAKTRKVIQVDEMIVEEEEEEENERKNLQTARVKRCPPSKKRTQSIQGKGKGKRSSRANTVTPAVGRLEVSMVKPTPGLTPRFDSRVFKTPGLRTPAAGERIYNISGNGSPLADSKEIFLTVPVGGGESLRLLASDLQRHSIAQLDPEALGNIKKLSNRLAQICSSIRTHK	-	1	MGAPTLPPAWQPFLKDHRISTFKNWPFLEGCACTPERMAEAGFIHCPTENEPDLAQCFFCFKELEGWEPDDDPIGPGTVAYACNTSTLGGRGGRITREEHKKHSSGCAFLSVKKQFEELTLGEFLKLDRERAKNKIAKETNNKKKEFEETAEKVRRAIEQLAAMD	-	1	MGTTAPGPIHLLELCDQKLMEFLCNMDNKDLVWLEEIQEEAERMFTREFSKEPELMPKTPSQKNRRKKRRISYVQDENRDPIRRRLSRRKSRSSQLSSRRLRSKDSVEKLATVVGENGSVLRRVTRAAAAAAAATMALAAPSSPTPESPTMLTKKPEDNHTQCQLVPVVEIGISERQNAEQHVTQLMSTEPLPRTLSPTPASATAPTSQGIPTSDEESTPKKSKARILESITVSSLMATPQDPKGQGVGTGRSASKLRIAQVSPGPRDSPAFPDSPWRERVLAPILPDNFSTPTGSRTDSQSVRHSPIAPSSPSPQVLAQKYSLVAKQESVVRRASRRLAKKTAEEPAASGRIICHSYLERLLNVEVPQKVGSEQKEPPEEAEPVAAAEPEVPENNGNN…	-
